# Supplementary material for: Stereoselective, borane-catalysed synthesis of syn-β-hydroxyketones from α,β-unsaturated ketones
Source: Royal Society of Chemistry journal article supplement (doi:10.1039/d6sc03052a), 2026-05-12
Supplement: d6sc03052a1.pdf [file d6sc03052a1.pdf]

# **Stereoselective, Borane-catalysed Synthesis of *syn*- $\beta$ -Hydroxyketones from $\alpha,\beta$ -Unsaturated Ketones**

Julie Macleod, Alastair J. Nimmo, Joseph H. P. Cockcroft, Paula Dominguez-Molano, Gary S. Nichol,  
and Stephen P. Thomas\*

## Supporting Information

|                                                                                                              |      |
|--------------------------------------------------------------------------------------------------------------|------|
| 1. General Experimental .....                                                                                | S2   |
| 2. General Procedures .....                                                                                  | S4   |
| 3. Reaction Optimisations .....                                                                              | S6   |
| 4. Preparation of $\alpha,\beta$ -Unsaturated Ketones .....                                                  | S13  |
| 5. Preparation of Boron Reagents .....                                                                       | S16  |
| 6. Racemic Substrate Scope .....                                                                             | S18  |
| 7. Unsuccessful Substrates .....                                                                             | S41  |
| 8. Enantioenriched Substrate Scope .....                                                                     | S42  |
| 9. Proposed Mechanism .....                                                                                  | S51  |
| 10. References .....                                                                                         | S52  |
| Appendix I: $^1\text{H}$ , $^{19}\text{F}\{^1\text{H}\}$ and $^{13}\text{C}\{^1\text{H}\}$ NMR Spectra ..... | S54  |
| Appendix II: HPLC Traces of Novel Compounds .....                                                            | S135 |
| Appendix III: Single Crystal X-ray Diffraction Data .....                                                    | S145 |

## 1. General Experimental

**Reaction Setup:** All reactions were performed in oven (180 °C) dried glassware under an atmosphere of anhydrous nitrogen or argon, unless otherwise indicated. All air- and moisture sensitive reactions were carried out using standard vacuum line and Schlenk techniques, or in a glovebox with a purified argon atmosphere. Glassware was cleaned using base (KOH, <sup>i</sup>PrOH) and acid (HNO<sub>3</sub>(aq)) baths. All reported reaction temperatures correspond to external heating block temperatures. Room temperature was approximately 16 - 20 °C. "Brine" refers to a saturated solution of sodium chloride in H<sub>2</sub>O.

**NMR Spectroscopy:** <sup>1</sup>H, <sup>11</sup>B, <sup>13</sup>C{<sup>1</sup>H}, and <sup>19</sup>F{<sup>1</sup>H} NMR spectra were recorded on Bruker Avance III 400 and 500 MHz; Bruker AVI 400 MHz; Bruker Avance I 600 MHz spectrometers. Chemical shifts are reported in parts per million (ppm). <sup>1</sup>H NMR spectra were referenced to the residual proteo solvent peak (CHCl<sub>3</sub>: 7.26 ppm; C<sub>6</sub>H<sub>6</sub>: 7.16 ppm). <sup>13</sup>C NMR spectra were referenced to the deuterated solvent peak (CDCl<sub>3</sub>: 77.00 ppm; C<sub>6</sub>D<sub>6</sub>: 128.06). <sup>11</sup>B NMR spectra were referenced to Et<sub>2</sub>O·BF<sub>3</sub> and a background suppression function was applied. Multiplicities are indicated by br. (broad), s (singlet), d (doublet), t (triplet), q (quartet), quin. (quintet), sext. (sextet) and app. (apparent). Coupling constants, *J*, are reported in Hertz and rounded to the nearest 0.1 Hz. MestReNova processing software was used to analyse all NMR spectra.

**Infrared Spectroscopy:** Infrared (IR) spectra were recorded on a Shimadzu IR-Spirit spectrometer. Relevant peaks are reported in cm<sup>-1</sup>.

**Mass Spectrometry:** Mass spectrometry (MS) was performed by the University of Edinburgh, School of Chemistry, Mass Spectrometry Laboratory. High-resolution mass spectra were recorded on a VG autospec, or Thermo/Finnigan MAT 900, mass spectrometer. Electrospray Ionization (ESI<sup>+</sup>) spectra were performed using a time-of-flight (TOF) mass analyser. Data are reported in the form of *m/z*.

**Chromatography:** Analytical thin-layer chromatography was performed on aluminium-backed silica plates (Merck 60 F<sub>254</sub>). Product spots were visualised by UV light at 254 nm. Flash column chromatography was carried out on a Teledyne ISCO CombiFlash NextGen 300+ using normal phase silica flash columns (Chromatography Direct; Modulus B Series; 12, 25 or 40 g; 40 – 63 μm; 60 Å).

**HPLC Analyses:** HPLC analyses were obtained on a Shimadzu LC-2050C 3D. Separation was achieved using Daicel CHIRALPAK IB, IC and IG columns using the method stated. HPLC traces of enantiomerically enriched compounds were compared with authentic racemic traces.

**Optical Rotations ([α]<sub>D</sub> values):** Specific rotations were recorded using a Bellingham and Stanley Ltd. ADP 450 polarimeter operating at sodium D line with a Bellingham and Stanley Ltd. 0.5 mL cell (*l* = 0.25 dm). Concentrations (*c*) are reported in g/100 mL.

**Melting Point:** Melting points were determined using a Stuart Scientific SMP10 melting point apparatus and are uncorrected.

**Solvents:** All solvents for air- and moisture sensitive techniques were obtained from an anhydrous solvent system (Innovative Technology). Reaction solvent tetrahydrofuran (THF) (Fisher, HPLC grade) was dried by percolation through two columns packed with neutral alumina under a positive pressure of argon. Reaction solvent toluene (ACS grade) was dried by percolation through a column packed with neutral alumina and a column packed with Q5 reactant (supported copper catalyst for scavenging oxygen) under a positive pressure of argon. Reaction solvent methyl *tert*-butyl ether (MTBE) was purchased from Fisher Scientific UK (extra dry). Solvents for work-up, filtration, transfers, chromatography, and recrystallisation were chloroform (CHCl<sub>3</sub>) (ACS grade, amylene stabilised), dichloromethane (CH<sub>2</sub>Cl<sub>2</sub>) (ACS grade, amylene stabilised), diethyl ether (Et<sub>2</sub>O) (Fisher, BHT stabilised ACS grade), ethyl acetate (EtOAc) (Fisher, ACS grade), hexane (ACS grade), methanol (MeOH) (ACS grade), ethanol (EtOH) (ACS grade), pentane (ACS grade), and petroleum ether (40–60 °C, ACS grade).

**Chemicals:** All reagents were purchased from Sigma Aldrich, Alfa Aesar, Acros Organics, Fluorochem and Fisher Scientific UK and used as received, or synthesised within the laboratory.

**Diastereoselectivity:** For optimisation reactions, the diastereoselectivity was determined using <sup>1</sup>H NMR spectroscopy of the crude reaction mixture. For the substrate scope, the diastereoselectivity was determined using <sup>1</sup>H NMR spectroscopy of both the crude reaction mixture and isolated product (i.e. before and after purification).

## 2. General Procedures

### General Procedure A: Substrate Synthesis

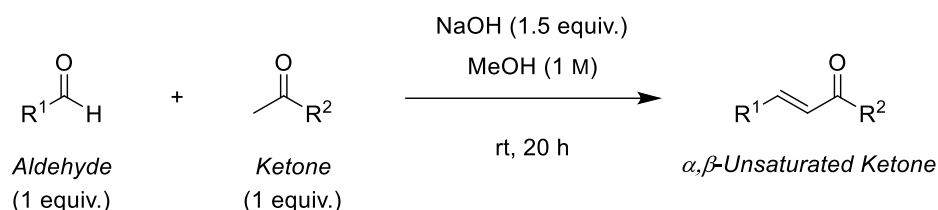

Following the procedure of Nicholson and Thomas,<sup>1</sup> the ketone (20 mmol, 1 equiv.) was added to a stirred solution of NaOH (30 mmol, 1.5 equiv.) in MeOH (20 mL, 1 M) and stirred at room temperature for 10 minutes. The aldehyde (20 mmol, 1 equiv.) was added dropwise and the solution was stirred for 20 hours at room temperature. Brine (20 mL) was added to the solution resulting in the precipitation of salts. The solution was extracted with dichloromethane (3 × 15 mL). The combined organic extracts were washed with brine (20 mL), water (20 mL), dried (Na<sub>2</sub>SO<sub>4</sub>), filtered and reduced *in vacuo*. The resulting  $\alpha,\beta$ -unsaturated ketones were purified by recrystallisation (*n*-hexane).

### General Procedure B: Racemic Reductive-coupling Conditions

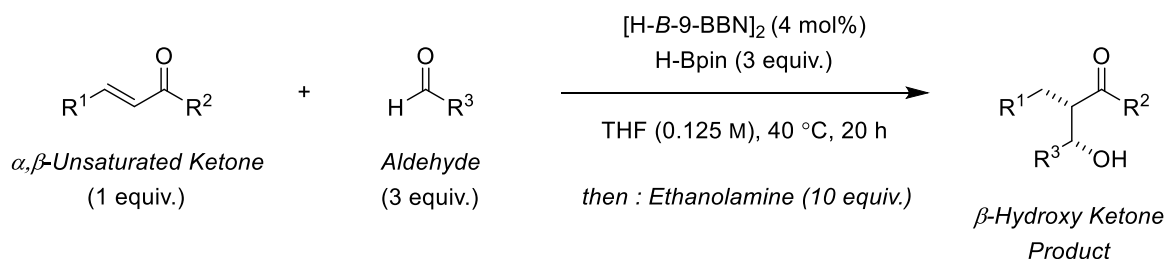

$\alpha,\beta$ -Unsaturated ketone (0.5 mmol, 1.0 equiv.), aldehyde (1.5 mmol, 3 equiv.) 9-borabicyclo(3.3.1)nonane ([H-B-9-BBN]<sub>2</sub>) (0.02 mmol, 4 mol%) and 4,4,5,5-tetramethyl-1,3,2-dioxaborolane (HBpin) (1.5 mmol, 3 equiv.) were stirred in tetrahydrofuran (THF) (0.125 M) at 40 °C for 20 hours. The reaction was cooled to room temperature and ethanolamine (5.0 mmol, 10 equiv.) was added dropwise. The precipitate was removed by filtration, washing with Et<sub>2</sub>O, then the crude product was concentrated *in vacuo*. The crude product was purified by flash column chromatography.

## General Procedure C: Enantioenriched Reductive-coupling Conditions

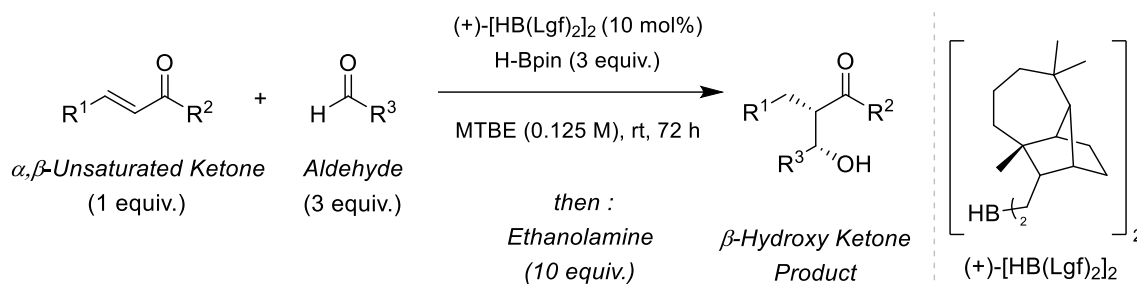

$\alpha,\beta$ -Unsaturated ketone (0.5 mmol, 1.0 equiv.), aldehyde (1.5 mmol, 3 equiv.) dilongifolylborane ((+)-[HB(Lgf)<sub>2</sub>]<sub>2</sub>) (0.05 mmol, 10 mol%) and 4,4,5,5-tetramethyl-1,3,2-dioxaborolane (HBpin) (1.5 mmol, 3 equiv.) were stirred in MTBE (0.125 M) at room temperature for 72 hours. Ethanolamine (5.0 mmol, 10 equiv.) was added dropwise. The precipitate was removed by filtration, washing with Et<sub>2</sub>O, then the crude product was concentrated *in vacuo*. The crude product was purified by flash column chromatography.

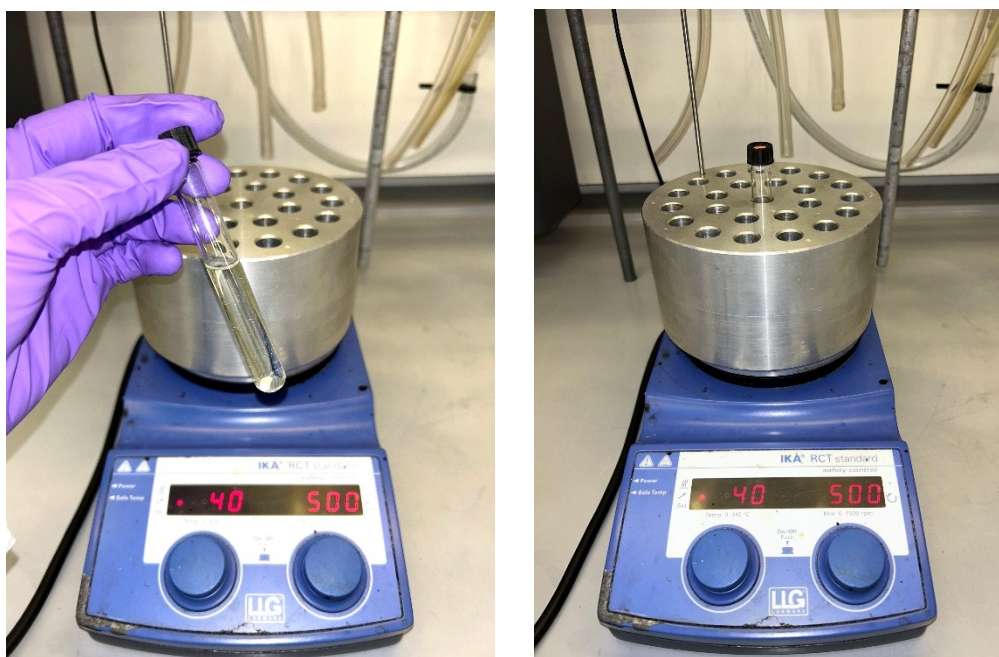

Reaction Set-up for General Procedures B and C

### 3. Reaction Optimisations

**Table S1: Optimisation of Reaction Conditions**

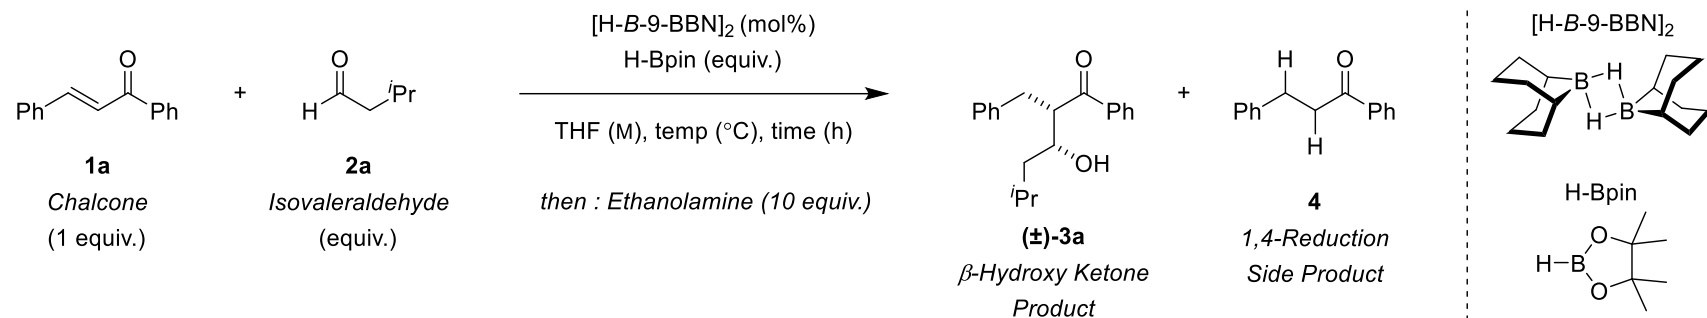

| Entry    | 2a (equiv.) | H-Bpin (equiv.) | $[H-B-9-BBN]_2$ (mol %) | Concentration (M) | Time (h)  | Temperature (°C) | Unreacted Chalcone (%) | Aldol Product ( $\pm$ )-3a Yield (%) | Side Product 4 Yield (%) | d.r. (syn:anti) |
|----------|-------------|-----------------|-------------------------|-------------------|-----------|------------------|------------------------|--------------------------------------|--------------------------|-----------------|
| 1        | 2.0         | None            | 50                      | 0.125             | 18        | 40               | <5                     | >95                                  | <5                       | >95:5           |
| 2        | 1.0         | 2.0             | 4                       | 0.125             | 18        | 40               | <5                     | 67                                   | 23                       | >95:5           |
| 3        | 1.2         | 2.0             | 4                       | 0.125             | 18        | 40               | <5                     | 81                                   | 15                       | >95:5           |
| 4        | 1.5         | 2.0             | 4                       | 0.125             | 18        | 40               | <5                     | 89                                   | <5                       | >95:5           |
| <b>5</b> | <b>2.0</b>  | <b>2.0</b>      | <b>4</b>                | <b>0.125</b>      | <b>18</b> | <b>40</b>        | <b>&lt;5</b>           | <b>&gt;95</b>                        | <b>&lt;5</b>             | <b>&gt;95:5</b> |
| <b>6</b> | <b>3.0</b>  | <b>2.0</b>      | <b>4</b>                | <b>0.125</b>      | <b>18</b> | <b>40</b>        | <b>&lt;5</b>           | <b>&gt;95</b>                        | <b>&lt;5</b>             | <b>&gt;95:5</b> |
| 7        | 4.0         | 2.0             | 4                       | 0.125             | 18        | 40               | <5                     | 91                                   | 6                        | >95:5           |
| 8        | 6.0         | 2.0             | 4                       | 0.125             | 18        | 40               | <5                     | 86                                   | 12                       | >95:5           |
| 9        | 1.5         | 2.0             | 4                       | 0.125             | 4         | 40               | 6                      | 56                                   | 40                       | >95:5           |
| 10       | 2.0         | 2.0             | 4                       | 0.125             | 4         | 40               | 12                     | 66                                   | 36                       | >95:5           |
| 11       | 3.0         | 2.0             | 4                       | 0.125             | 4         | 40               | 8                      | 70                                   | 26                       | >95:5           |

|           |            |            |          |              |           |           |              |               |              |                 |
|-----------|------------|------------|----------|--------------|-----------|-----------|--------------|---------------|--------------|-----------------|
| 12        | 4.0        | 2.0        | 4        | 0.125        | 4         | 40        | 10           | <b>75</b>     | 24           | >95:5           |
| 13        | 6.0        | 2.0        | 4        | 0.125        | 4         | 40        | 21           | <b>43</b>     | 58           | >95:5           |
| 14        | 2.0        | 2.0        | 4        | 0.125        | 6         | 40        | 6            | <b>76</b>     | 28           | >95:5           |
| 15        | 3.0        | 2.0        | 4        | 0.125        | 6         | 40        | 5            | <b>83</b>     | 21           | >95:5           |
| 16        | 4.0        | 2.0        | 4        | 0.125        | 6         | 40        | 7            | <b>84</b>     | 25           | >95:5           |
| 17        | 1.5        | 2.0        | 4        | 0.125        | 7         | 40        | 11           | <b>62</b>     | 24           | >95:5           |
| 18        | 1.5        | 2.0        | 4        | 0.125        | 7         | 50        | <5           | <b>79</b>     | 8            | >95:5           |
| 19        | 2.0        | 2.0        | 4        | 0.125        | 8         | 40        | 6            | <b>82</b>     | 16           | >95:5           |
| 20        | 3.0        | 2.0        | 4        | 0.125        | 8         | 40        | 8            | <b>76</b>     | 29           | >95:5           |
| 21        | 1.5        | 2.0        | 1        | 0.125        | 18        | 40        | 6            | <b>54</b>     | 26           | >95:5           |
| 22        | 1.5        | 2.0        | 2        | 0.125        | 18        | 40        | <5           | <b>62</b>     | 10           | >95:5           |
| 23        | 1.5        | 2.0        | 3        | 0.125        | 18        | 40        | <5           | <b>87</b>     | <5           | >95:5           |
| 24        | 1.5        | 2.0        | 5        | 0.125        | 18        | 40        | <5           | <b>91</b>     | <5           | >95:5           |
| 25        | 1.5        | 2.0        | 6        | 0.125        | 18        | 40        | <5           | <b>87</b>     | <5           | >95:5           |
| 26        | 1.5        | 2.0        | 8        | 0.125        | 18        | 40        | <5           | <b>80</b>     | <5           | >95:5           |
| 27        | 1.5        | 2.0        | 4        | 0.125        | 18        | 30        | <5           | <b>81</b>     | 10           | >95:5           |
| 28        | 1.5        | 2.0        | 4        | 0.125        | 18        | RT        | 7            | <b>63</b>     | 29           | >95:5           |
| 29        | 1.5        | 1.0        | 4        | 0.125        | 18        | 40        | 7            | <b>59</b>     | 33           | >95:5           |
| 30        | 1.5        | 1.4        | 4        | 0.125        | 18        | 40        | 5            | <b>81</b>     | <5           | >95:5           |
| 31        | 1.5        | 1.8        | 4        | 0.125        | 18        | 40        | <5           | <b>86</b>     | <5           | >95:5           |
| <b>32</b> | <b>1.5</b> | <b>3.0</b> | <b>4</b> | <b>0.125</b> | <b>18</b> | <b>40</b> | <b>&lt;5</b> | <b>&gt;95</b> | <b>&lt;5</b> | <b>&gt;95:5</b> |
| 33        | 1.2        | 2.0        | 4        | 0.100        | 18        | 40        | <5           | <b>74</b>     | <5           | >95:5           |
| 34        | 1.2        | 2.0        | 4        | 0.166        | 18        | 40        | <5           | <b>25</b>     | 32           | >95:5           |

**Table S2: Solvent Screening**

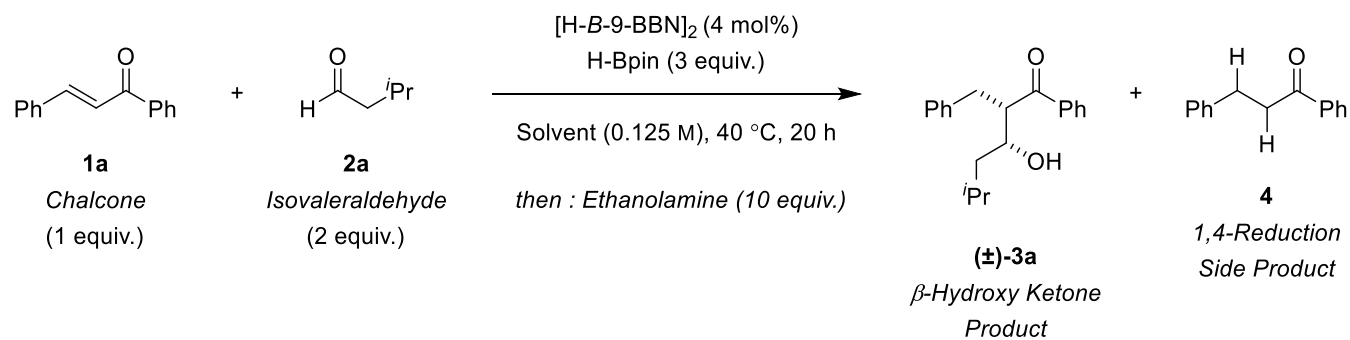

| Entry | Solvent                 | Unreacted Chalcone (%) | Aldol Product 3a Yield (%) | Side Product 4 Yield (%) | d.r. (syn:anti) |
|-------|-------------------------|------------------------|----------------------------|--------------------------|-----------------|
| 1     | THF                     | <5                     | >95                        | <5                       | >95:5           |
| 2     | 2,2,5,5-tetramethyl THF | 34                     | 21                         | 11                       | >95:5           |
| 3     | MTBE                    | <5                     | 83                         | <5                       | >95:5           |
| 4     | Toluene                 | <5                     | 89                         | <5                       | >95:5           |
| 5     | Acetonitrile            | <5                     | 90                         | <5                       | >95:5           |
| 6     | Pentane                 | <5                     | 40                         | <5                       | >95:5           |
| 7     | Hexane                  | <5                     | 43                         | <5                       | >95:5           |
| 8     | Cyclohexane             | <5                     | 32                         | <5                       | >95:5           |

**Table S3: Borane Screening**

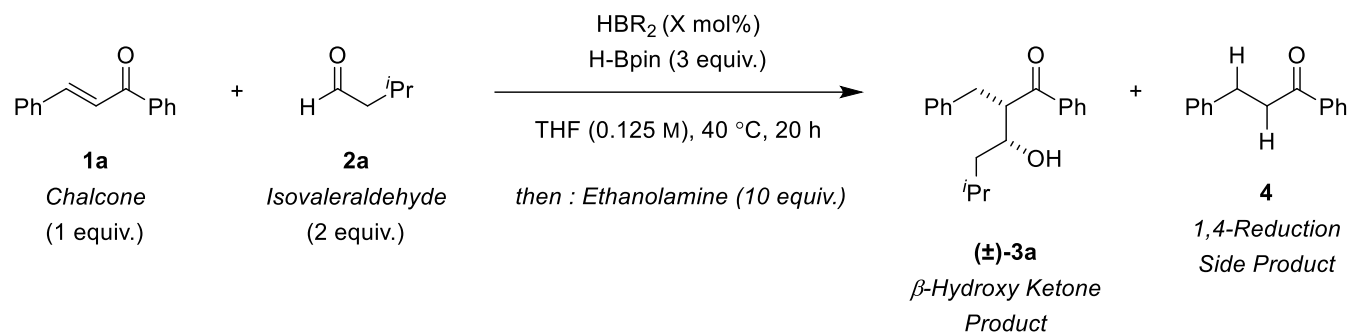

| Entry | HBR <sub>2</sub>                                                | mol%     | Unreacted Chalcone (%) | Aldol Product 3a Yield (%) | Side Product 4 Yield (%) | d.r. (syn:anti) |
|-------|-----------------------------------------------------------------|----------|------------------------|----------------------------|--------------------------|-----------------|
| 1     | -                                                               | -        | 34                     | 14                         | 45                       | -               |
| 2     | Me <sub>2</sub> S·BH <sub>3</sub>                               | 20       | <5                     | -                          | -                        | -               |
| 3     | THF·HBSia <sub>2</sub>                                          | 5        | 5                      | <b>32</b>                  | 36                       | 85:15           |
| 4     |                                                                 | 10       | 7                      | <b>41</b>                  | 34                       | 92:8            |
| 5     | [HB(C <sub>6</sub> F <sub>5</sub> ) <sub>2</sub> ] <sub>2</sub> | 5        | 7                      | <b>34</b>                  | 43                       | 95:5            |
| 6     | [HBCy <sub>2</sub> ] <sub>2</sub>                               | 4        | 6                      | <b>68</b>                  | 34                       | >95:5           |
| 7     |                                                                 | 5        | <5                     | <b>79</b>                  | 15                       | >95:5           |
| 8     | <b>[H-B-9-BBN]<sub>2</sub></b>                                  | <b>4</b> | <b>&lt;5</b>           | <b>&gt;95</b>              | <b>&lt;5</b>             | <b>&gt;95:5</b> |

**Figure S1: Effect of a One-pot Versus Two-step Protocol on Product Diastereoselectivity**

**A) One-pot Protocol: Excellent Diastereoselectivity**

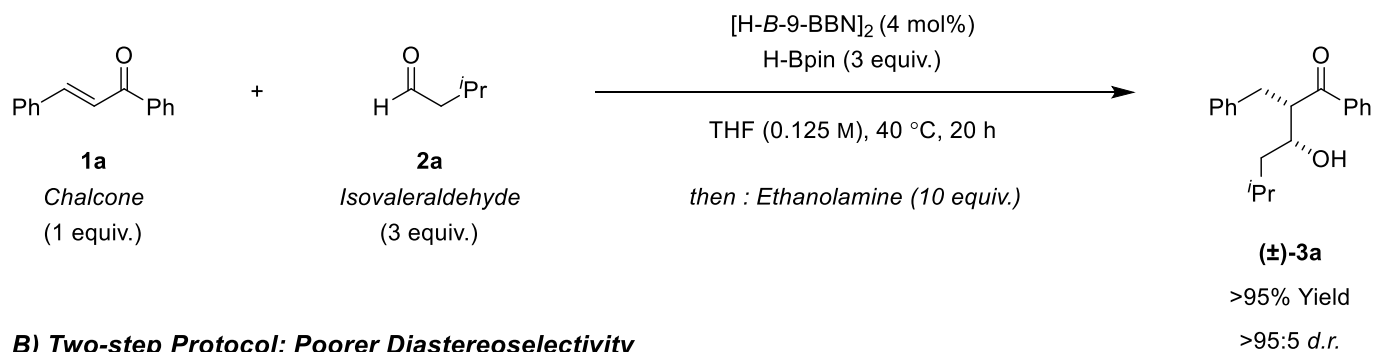

**B) Two-step Protocol: Poorer Diastereoselectivity**

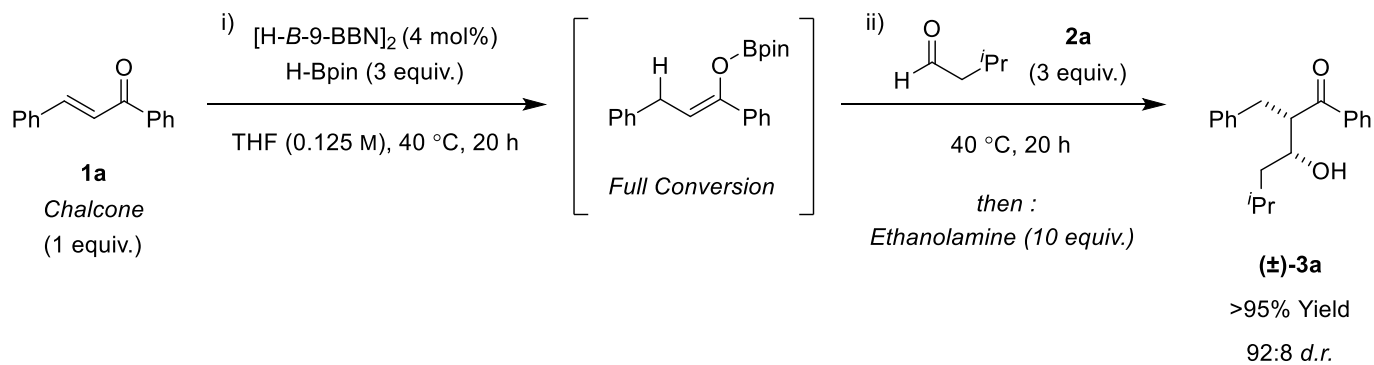

**Table S4: Enantioenriched Borane Screen**

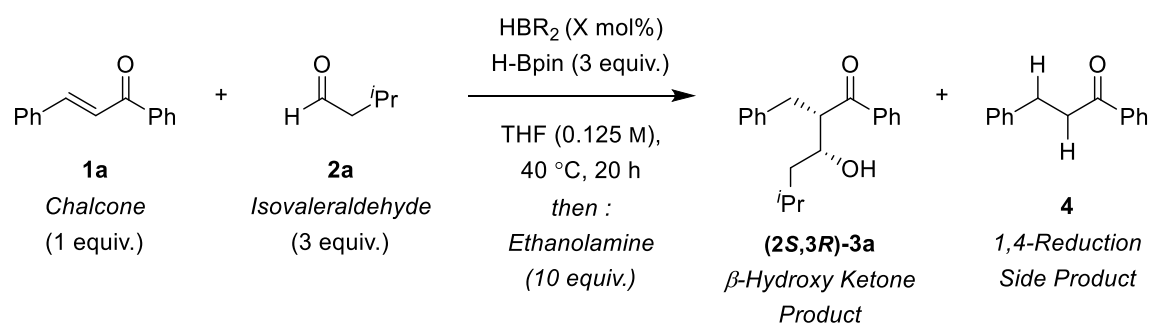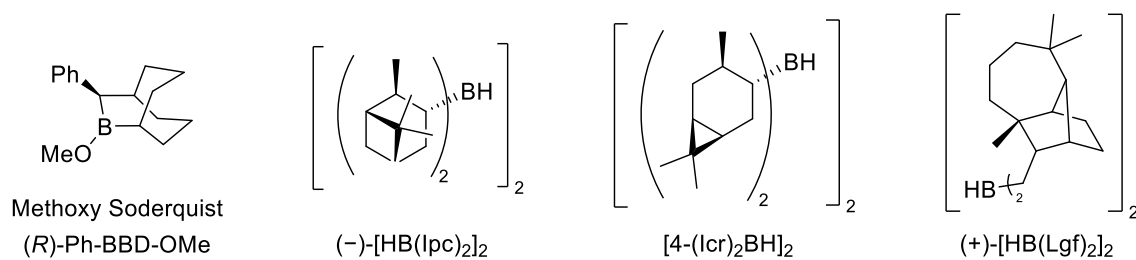

| Entry | HBR <sub>2</sub>                         | mol%          | Unreacted Chalcone (%) | (2S,3R)-3a Yield (%) | Side Product 4 Yield (%) | d.r. (syn:anti) | e.r.  |
|-------|------------------------------------------|---------------|------------------------|----------------------|--------------------------|-----------------|-------|
| 1     | ( <i>R</i> )-Ph-BBD-OMe + 5 equiv. HBpin | 10            | <5                     | 92 (77)              | <5                       | >95:5           | 48:52 |
| 2     | (-)-[HB(lpc) <sub>2</sub> ] <sub>2</sub> | 10            | <5                     | 67 (57)              | 18                       | 90:10           | 59:41 |
| 3     |                                          | 50 (no HBpin) | <5                     | 69 (54)              | 12                       | 90:10           | 69:31 |
| 4     | [4-(lcr) <sub>2</sub> BH] <sub>2</sub>   | 10            | 15                     | 67 (56)              | 6                        | 85:15           | 56:44 |
| 5     |                                          | 50            | 15                     | 24 (16)              | 55                       | -               | 68:32 |
| 6     | (+)-[HB(Lgf) <sub>2</sub> ] <sub>2</sub> | 10            | <5                     | 79 (67)              | 24                       | >95:5           | 86:14 |
| 7     |                                          | 50            | <5                     | 87 (80)              | 19                       | >95:5           | 87:13 |

**Table S5: Enantioenriched Reaction Optimisation with Dilongifolylborane**

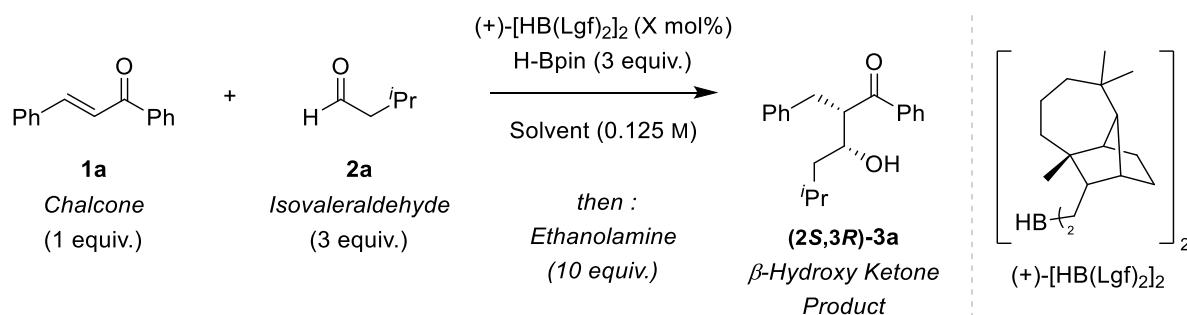

| Entry | Mol%           | Solvent                  | Temperature (°C) | Time (h) | Yield (%) | d.r. (syn:anti) | e.r.  |
|-------|----------------|--------------------------|------------------|----------|-----------|-----------------|-------|
| 1     | 10             | THF                      | 40               | 24       | 62 (48)   | >95:5           | 82:18 |
| 2     | Stoichiometric | THF                      | 40               | 24       | 74 (64)   | >95:5           | 82:18 |
| 3     | 10             | THF                      | rt               | 72       | 79 (67)   | >95:5           | 86:14 |
| 4     | Stoichiometric | THF                      | rt               | 72       | 87 (80)   | >95:5           | 87:13 |
| 5     | 10             | MTBE                     | rt               | 72       | 91 (80)   | >95:5           | 90:10 |
| 6     | Stoichiometric | MTBE                     | rt               | 72       | 84 (78)   | >95:5           | 92:8  |
| 7     | 10             | MTBE                     | 5                | 168      | >95 (95)  | >95:5           | 86:16 |
| 8     | 10             | DME                      | rt               | 72       | 92 (79)   | >95:5           | 85:15 |
| 9     | 10             | Dioxane                  | rt               | 72       | 84 (76)   | >95:5           | 89:11 |
| 10    | 10             | Cyclopentyl Methyl Ether | rt               | 72       | >95 (90)  | >95:5           | 87:13 |
| 11    | 10             | EtOAc                    | rt               | 72       | >95 (77)  | >95:5           | 88:12 |
| 12    | Stoichiometric | EtOAc                    | rt               | 72       | >95 (70)  | >95:5           | 90:10 |
| 13    | 10             | Ethyl Isovalerate        | rt               | 72       | >95 (90)  | >95:5           | 86:14 |
| 14    | 10             | <i>t</i> -Butyl acetate  | rt               | 72       | >95 (86)  | >95:5           | 86:14 |
| 15    | 10             | Dimethyl Carbonate       | rt               | 72       | >95 (93)  | >95:5           | 86:14 |
| 16    | 10             | Hexane                   | rt               | 72       | 70 (64)   | >95:5           | 77:23 |
| 17    | 10             | Toluene                  | rt               | 72       | >95 (88)  | >95:5           | 83:17 |
| 18    | Stoichiometric | Toluene                  | rt               | 72       | 93 (90)   | >95:5           | 89:11 |

## 4. Preparation of $\alpha,\beta$ -Unsaturated Ketones

The following  $\alpha,\beta$ -unsaturated ketones were available in the laboratory, previously prepared in accordance with literature: **S1**,<sup>1</sup> **S2**,<sup>1</sup> **S3**,<sup>1</sup> **S4**,<sup>1</sup> **S5**,<sup>1</sup> **S6**,<sup>1</sup> **S7**,<sup>1</sup> **S8**<sup>1</sup> and **7**.<sup>2</sup>

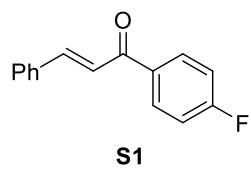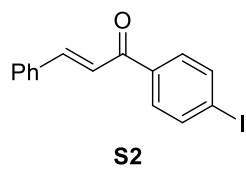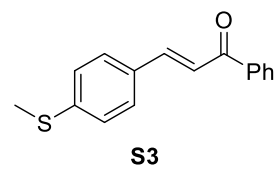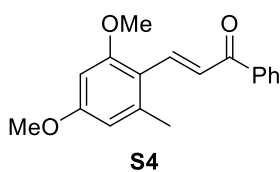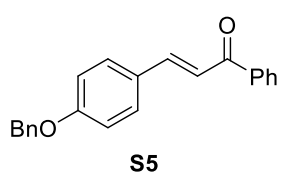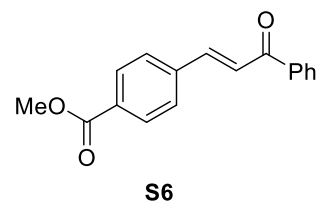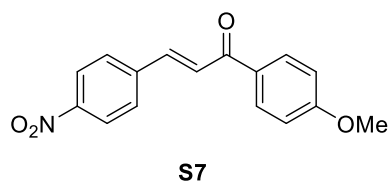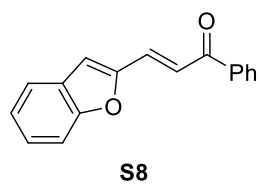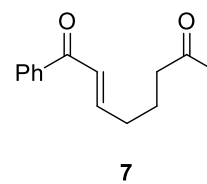

### (2E)-1-Cyclopropyl-3-phenyl-2-propen-1-one (S9)

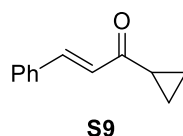

Following General Procedure A, cyclopropyl methyl ketone (2.0 mL, 20 mmol, 1 equiv.), benzaldehyde (2.5 mL, 20 mmol, 1 equiv.), sodium hydroxide (1.2 g, 30 mmol, 1.5 equiv.) and methanol (20 mL, 1 M) gave crude product that was purified by trituration with *n*-hexane to give the  $\alpha,\beta$ -unsaturated ketone **S9** as an amorphous white solid (1.1 g, 6.4 mmol, 33%).

**<sup>1</sup>H NMR:** (600 MHz, CDCl<sub>3</sub>)

0.96 – 1.00 (m, 2H), 1.16 – 1.18 (m, 2H), 2.25 (tt,  $J = 7.9, 4.6$  Hz, 1H), 6.88 (d,  $J = 16.2$  Hz, 1H), 7.39 – 7.40 (m, 3H), 7.56 – 7.58 (m, 2H), 7.62 (d,  $J = 16.1$  Hz, 1H).

**<sup>13</sup>C{<sup>1</sup>H} NMR:** (126 MHz, CDCl<sub>3</sub>)

11.5, 19.8, 126.6, 128.4, 129.1, 130.5, 134.9, 142.1, 200.2.

Spectroscopic data were in accordance with those previously reported.<sup>3</sup>

### (1E)-4,4-Dimethyl-1-phenyl-1-penten-3-one (S10)

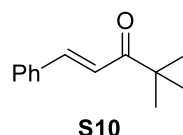

Following General Procedure A, 3,3-dimethyl-2-butanone (2.0 mL, 20 mmol, 1 equiv.), benzaldehyde (2.5 mL, 20 mmol, 1 equiv.), sodium hydroxide (1.2 g, 30 mmol, 1.5 equiv.) and methanol (20 mL, 1 M) gave crude product that was purified by trituration with *n*-hexane to give the  $\alpha,\beta$ -unsaturated ketone **S10** as an amorphous white solid (0.31 g, 1.6 mmol, 8%).

**<sup>1</sup>H NMR:** (500 MHz, CDCl<sub>3</sub>)

1.24 (s, 9H), 7.13 (d,  $J = 15.6$  Hz, 1H), 7.37 – 7.40 (m, 3H), 7.57 – 7.58 (m, 2H), 7.68 (d,  $J = 15.6$  Hz, 1H).

**<sup>13</sup>C{<sup>1</sup>H} NMR:** (126 MHz, CDCl<sub>3</sub>)

26.5, 43.4, 120.9, 128.4, 129.0, 130.3, 135.1, 143.0, 204.4.

Spectroscopic data were in accordance with those previously reported.<sup>4</sup>

**(E)-7-Oxo-7-phenylhept-5-enal (5)**

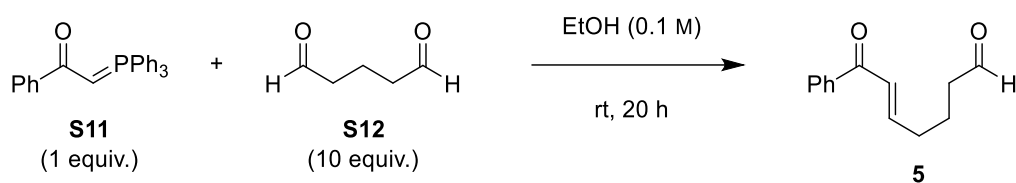

By modification of procedure reported by Benaglia and co-workers,<sup>5</sup> 1-phenyl-2-(triphenylphosphanylidene)ethan-1-one **S11** (1.00 g, 2.5 mmol, 1 equiv.) was dissolved in EtOH (30 mL) at room temperature, then glutaric aldehyde **S12** (4.7 mL, 50 mmol, 10 equiv.) was added. The reaction was stirred at room temperature for 20 hours. Water (50 mL) was added and the reaction mixture was extracted with Et<sub>2</sub>O (3 × 50 mL). The combined organic extracts were washed with HCl (0.2 M, 3 × 50 mL), brine (3 × 50 mL), dried (Na<sub>2</sub>SO<sub>4</sub>), filtered and reduced *in vacuo*. The crude compound was purified by flash silica gel chromatography (80:20 *n*-hexane/EtOAc) to give the product as a yellow oil (325 mg, 1.6 mmol, 64%).

**<sup>1</sup>H NMR:** (500 MHz, CDCl<sub>3</sub>)

1.87 (quin., *J* = 7.2 Hz, 2H), 2.31 – 2.40 (m, 2H), 2.51 (dt, *J* = 7.3, 1.4 Hz, 2H), 6.90 (dt, *J* = 15.4, 1.4 Hz, 1H), 7.00 (dt, *J* = 15.4, 6.8 Hz, 1H), 7.42 – 7.50 (m, 2H), 7.51 – 7.58 (m, 1H), 7.91 (dd, *J* = 8.4, 1.3 Hz, 2H), 9.78 (s, 1H).

**<sup>13</sup>C{<sup>1</sup>H} NMR:** (126 MHz, CDCl<sub>3</sub>)

20.6, 32.0, 43.1, 126.7, 128.6, 128.7, 132.9, 137.9, 148.1, 190.6, 201.7.

Spectroscopic data were in accordance with those previously reported.<sup>6</sup>

## 5. Preparation of Boron Reagents

The following boranes were available in the laboratory, previously prepared in accordance with literature: **S13**<sup>7</sup>, **S14**<sup>8</sup>, **S15**<sup>9</sup>.

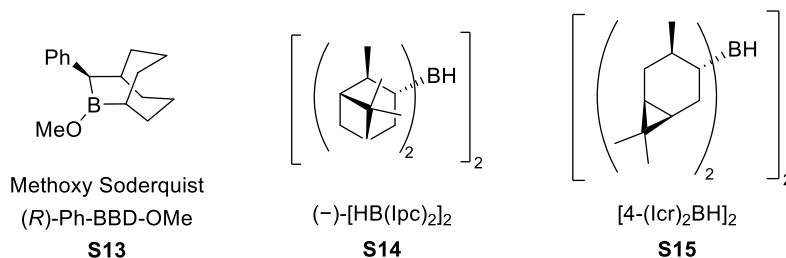

### 4,4,5,5-Tetraethyl-1,3,2-dioxaborolane (HB(Epin)) (**S16**)

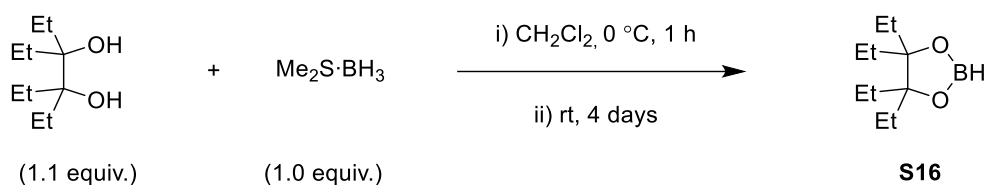

Procedure adapted from Kochi and co-workers.<sup>10</sup> A solution of 3,4-diethylhexane-3,4-diol (4.8 g, 28 mmol, 1.1 equiv.) in CH<sub>2</sub>Cl<sub>2</sub> (10 mL, 2.8 M) was added dropwise over 1 hour to a solution of Me<sub>2</sub>S·BH<sub>3</sub> (2.5 mL, 26 mmol, 1 equiv.) in CH<sub>2</sub>Cl<sub>2</sub> (10 mL, 2.6 M) at 0 °C. The solution was warmed to room temperature and stirred for 4 days. The crude mixture was purified using a method reported by Thomas and co-workers to obtain the resulting dioxaborolane **S16** as a colourless liquid (2.6 g, 14 mmol, 54%).<sup>11</sup>

**<sup>1</sup>H NMR:** (500 MHz, CHCl<sub>3</sub>)

0.78 (t, *J* = 7.5 Hz, 12H), 1.43 (sext., *J* = 7.5 Hz, 4H), 1.55 (sext., *J* = 7.5 Hz, 4H), 4.20 (br q, *J* = 147.8 Hz, 1H)

**<sup>13</sup>C{<sup>1</sup>H} NMR:** (126 MHz, CDCl<sub>3</sub>)

8.9, 26.4, 88.6

**<sup>11</sup>B NMR:** (128 MHz, C<sub>6</sub>D<sub>6</sub>)

27.7 (d)

Spectroscopic data were in accordance with those previously reported.<sup>10, 11</sup>

## Dilongifolylborane, (+)-[HB(Lgf)<sub>2</sub>]<sub>2</sub>, (**S17**)

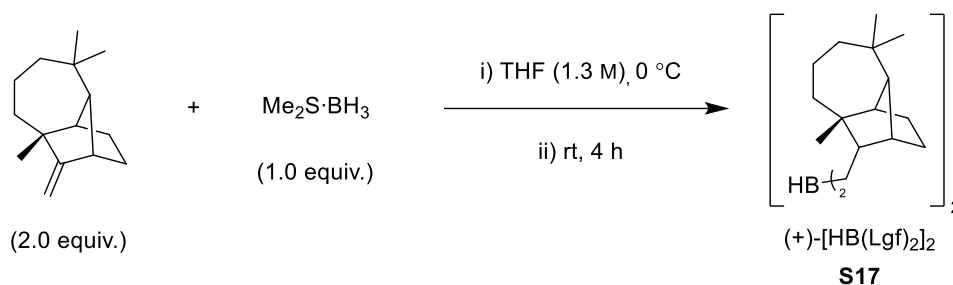

Procedure adapted from Brown and co-workers.<sup>9, 12</sup> (+)-Longifolene (4.4 mL, 20 mmol, 2.0 equiv.) was added dropwise to a solution of Me<sub>2</sub>S·BH<sub>3</sub> (0.95 mL, 10 mmol, 1.0 equiv.) in THF (8.0 mL, 1.3 M) at 0 °C. The solution was warmed to room temperature and stirred overnight. Precipitation of an amorphous white solid was observed. The solvent (THF) and SMe<sub>2</sub> were removed by cannula filtration and the amorphous white solid was washed with diethyl ether (3 × 10 mL). Residual solvent was removed *in vacuo*. The resulting dialkylborane **S17** was obtained as an amorphous white solid (1.6 g, 3.8 mmol, 38%).

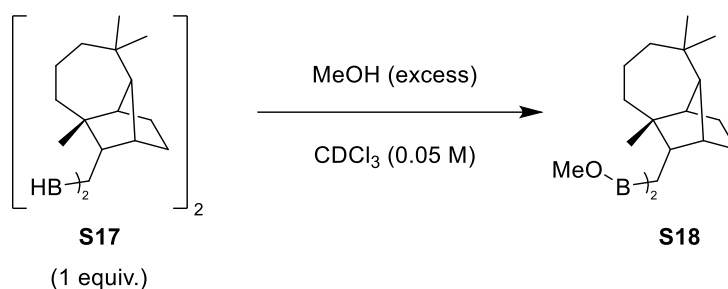

Dilongifolylborane **S17** is insoluble in all common solvents. Therefore, to analyse the sample, dilongifolylborane **S17** was methanolysed in an NMR tube with excess MeOH to form soluble *B*-methoxy-dilongifolylborane **S18**.

**<sup>1</sup>H NMR:** (500 MHz, CHCl<sub>3</sub>)

0.82 (s, 6H), 0.86 (s, 6H), 0.88 (s, 6H), 0.89 – 0.92 (m, 2H), 1.04 – 1.09 (m, 2H), 1.14 – 1.18 (m, 4H), 1.25 (s, 2H), 1.26 – 1.59 (m, 18H), 1.87 (d, *J* = 4.2 Hz, 2H), 3.62 (s, 3H)

**<sup>13</sup>C{<sup>1</sup>H} NMR:** (126 MHz, CDCl<sub>3</sub>)

21.4, 22.7 (br s), 25.0, 31.0, 31.5, 32.2, 32.9, 34.3, 37.3, 39.3, 44.8, 45.7, 45.7, 51.5, 53.2, 64.7

**<sup>11</sup>B NMR:** (160 MHz, THF)

54.6 (br s)

Spectroscopic data were in accordance with those previously reported.<sup>9, 12</sup>

## 6. Racemic Substrate Scope

### 2-Benzyl-3-hydroxy-5-methyl-1-phenylhexan-1-one (3a)

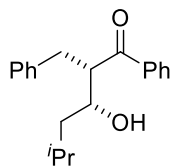

**3a**

Following General Procedure B, (*E*)-chalcone (100 mg, 0.50 mmol, 1.0 equiv.), isovaleraldehyde (0.16 mL, 1.5 mmol, 3 equiv.), [H-B-9-BBN]<sub>2</sub> (5 mg, 0.02 mmol, 4 mol%), HBpin (0.22 mL, 1.5 mmol, 3 equiv.) and THF (4 mL, 0.125 M) were reacted to give the crude aldol product (>95:5 *d.r.*) that was purified by flash column chromatography (hexane:ethyl acetate, 99:1 to 90:10) to give the β-hydroxy ketone product **3a** as an amorphous white solid (130 mg, 0.44 mmol, 87%, >95:5 *d.r.*).

**<sup>1</sup>H NMR:** (500 MHz, CDCl<sub>3</sub>)

0.91 (d, *J* = 6.6 Hz, 3H), 0.93 (d, *J* = 6.7 Hz, 3H) 1.25 – 1.30 (m, 1H), 1.57 – 1.63 (m, 1H), 1.79 – 1.89 (m, 1H), 2.63 (d, *J* = 3.3 Hz, 1H), 3.09 – 3.18 (m, 2H), 3.75 – 3.78 (m, 1H), 4.00 – 4.04 (m, 1H), 7.06 – 7.10 (m, 1H), 7.12 – 7.17 (m, 4H), 7.32 -7.35 (m, 2H), 7.46 – 7.49 (m, 1H), 7.67 – 7.69 (m, 2H).

**<sup>13</sup>C{<sup>1</sup>H} NMR:** (126 MHz, CDCl<sub>3</sub>)

22.0, 23.6, 25.0, 33.7, 44.1, 53.7, 70.3, 126.3, 128.5, 128.6, 128.6, 129.1, 133.3, 137.6, 139.8, 205.2.

Spectroscopic data were in accordance with those previously reported.<sup>13</sup>

## 2-Benzyl-3-hydroxy-1-phenyloctan-1-one (3b)

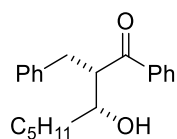

**3b**

Following General Procedure B, (*E*)-chalcone (100 mg, 0.50 mmol, 1.0 equiv.), hexanal (0.18 mL, 1.5 mmol, 3 equiv.), [H-*B*-9-BBN]<sub>2</sub> (5 mg, 0.02 mmol, 4 mol%), HBpin (0.22 mL, 1.5 mmol, 3 equiv.) and THF (4 mL, 0.125 M) gave crude product (>95:5 *d.r.*) that was purified by flash column chromatography (hexane:ethyl acetate, 99:1 to 90:10) to give the β-hydroxy ketone product **3b** as a colourless oil (120 mg, 0.39 mmol, 77%, >95:5 *d.r.*).

**<sup>1</sup>H NMR:** (500 MHz, CDCl<sub>3</sub>)

0.88 (t, *J* = 7.0 Hz, 3H), 1.26 – 1.39 (m, 5H), 1.50 – 1.53 (m, 2H), 1.58 – 1.64 (m, 1H), 2.76 (s, 1H), 3.11 – 3.19 (m, 2H), 3.80 – 3.83 (m, 1H), 3.92 – 3.96 (m, 1H), 7.06 – 7.10 (m, 1H), 7.12 – 7.17 (m, 4H), 7.31 – 7.35 (m, 2H), 7.46 – 7.49 (m, 1H), 7.68 – 7.69 (m, 2H).

**<sup>13</sup>C{<sup>1</sup>H} NMR:** (126 MHz, CDCl<sub>3</sub>)

14.1, 22.7, 25.9, 31.8, 33.7, 35.0, 53.5, 72.3, 126.3, 128.4, 128.5, 128.6, 129.1, 133.3, 137.6, 139.8, 205.1.

**IR ν<sub>max</sub>:** (neat)

3439 (w, br), 2956 (m), 2930 (m), 2858 (m), 1668 (s).

**HRMS:** (*m/z*, ESI<sup>+</sup>)

Requires: 311.2006 (C<sub>21</sub>H<sub>27</sub>O<sub>2</sub>, [M + H]<sup>+</sup>), Found: 311.2006

## 2-Benzyl-3-hydroxy-1-phenyldodecan-1-one (3c)

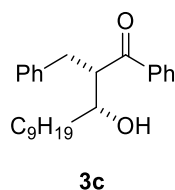

Following General Procedure B, (*E*)-chalcone (100 mg, 0.50 mmol, 1.0 equiv.), decanal (0.28 mL, 1.5 mmol, 3 equiv.), [H-*B*-9-BBN]<sub>2</sub> (5 mg, 0.02 mmol, 4 mol%), HBpin (0.22 mL, 1.5 mmol, 3 equiv.) and THF (4 mL, 0.125 M) gave crude product (>95:5 *d.r.*) that was purified by flash column chromatography (hexane:ethyl acetate, 99:1 to 90:10) to give the β-hydroxy ketone product **3c** as a colourless oil (160 mg, 0.45 mmol, 90%, >95:5 *d.r.*).

**<sup>1</sup>H NMR:** (500 MHz, CDCl<sub>3</sub>)

0.87 – 0.90 (m, 3H), 1.26 – 1.30 (m, 12H), 1.35 – 1.39 (m, 1H), 1.46 – 1.56 (m, 2H), 1.58 – 1.66 (m, 1H), 2.70 – 2.71 (m, 1H), 3.10 – 3.19 (m, 2H), 3.81 (dt, *J* = 9.4, 4.4 Hz, 1H), 3.91 – 3.95 (m, 1H), 7.06 – 7.10 (m, 1H), 7.12 – 7.17 (m, 4H), 7.32 – 7.35 (m, 2H), 7.46 – 7.49 (m, 1H), 7.67 – 7.69 (m, 2H).

**<sup>13</sup>C{<sup>1</sup>H} NMR:** (126 MHz, CDCl<sub>3</sub>)

14.2, 22.8, 26.2, 29.4, 29.6, 29.6, 29.7, 32.0, 33.7, 35.0, 53.4, 72.3, 126.3, 128.4, 128.5, 128.6, 129.1, 133.3, 137.6, 139.8, 205.1.

**IR ν<sub>max</sub>:** (neat)

3426 (w, br), 2924 (m), 2854 (m), 1672 (s).

**HRMS:** (*m/z*, ESI<sup>+</sup>)

Requires: 367.2632 (C<sub>25</sub>H<sub>35</sub>O<sub>2</sub>, [M + H]<sup>+</sup>), Found: 367.2634 (+0.65 ppm)

## 2-Benzyl-3-cyclopropyl-3-hydroxy-1-phenylpropan-1-one (3d)

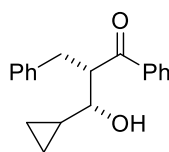

**3d**

Following General Procedure B, (*E*)-chalcone (100 mg, 0.50 mmol, 1.0 equiv), cyclopropanecarboxaldehyde (0.10 mL, 1.5 mmol, 3 equiv.), [H-*B*-9-BBN]<sub>2</sub> (5 mg, 0.02 mmol, 4 mol%), HBpin (0.22 mL, 1.5 mmol, 3 equiv.) and THF (4 mL, 0.125 M) gave crude product (>95:5 *d.r.*) that was purified by flash column chromatography (hexane:ethyl acetate, 99:1 to 90:10) to give the β-hydroxy ketone product **3d** as an amorphous white solid (110 mg, 0.39 mmol, 77%, >95:5 *d.r.*).

**<sup>1</sup>H NMR:** (500 MHz, CDCl<sub>3</sub>)

0.20 – 0.25 (m, 1H), 0.34 – 0.43 (m, 2H), 0.51 – 0.56 (m, 1H), 0.96 – 1.02 (m, 1H), 2.47 (d, *J* = 2.7 Hz, 1H), 3.16 – 3.19 (m, 1H), 3.21 – 3.28 (m, 2H), 4.02 (dt, *J* = 9.9, 4.8 Hz, 1H), 7.07 – 7.11 (m, 1H), 7.15 – 7.17 (m, 4H), 7.31 – 7.34 (m, 2H), 7.45 – 7.48 (m, 1H), 7.70 – 7.72 (m, 2H).

**<sup>13</sup>C{<sup>1</sup>H} NMR:** (126 MHz, CDCl<sub>3</sub>)

3.6, 3.8, 16.3, 34.7, 54.4, 77.5, 126.3, 128.4, 128.5, 128.5, 129.1, 133.1, 138.1, 139.9, 204.2.

Spectroscopic data were in accordance with those previously reported.<sup>13</sup>

## 2-Benzyl-3-cyclohexyl-3-hydroxy-1-phenylpropan-1-one (3e)

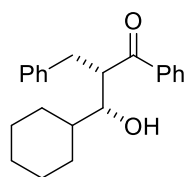

**3e**

Following General Procedure B, (*E*)-chalcone (100 mg, 0.50 mmol, 1.0 equiv.), cyclohexanecarboxaldehyde (0.18 mL, 1.5 mmol, 3 equiv.), [H-B-9-BBN]<sub>2</sub> (5 mg, 0.02 mmol, 4 mol%), HBpin (0.22 mL, 1.5 mmol, 3 equiv.) and THF (4 mL, 0.125 M) gave crude product (>95:5 *d.r.*) that was purified by flash column chromatography (hexane:ethyl acetate, 99:1 to 90:10) to give the β-hydroxy ketone product **3e** as an amorphous white solid (100 mg, 0.31 mmol, 62%, >95:5 *d.r.*).

**<sup>1</sup>H NMR:** (500 MHz, CDCl<sub>3</sub>)

0.95 – 1.03 (m, 1H), 1.09 – 1.19 (m, 3H), 1.21 – 1.31 (m, 1H), 1.55 – 1.61 (m, 1H), 1.66 – 1.74 (m, 2H), 1.78 – 1.83 (m, 2H), 2.02 – 2.05 (m, 1H), 2.76 (d, *J* = 2.9 Hz, 1H), 3.05 (dd, *J* = 13.7, 3.7 Hz, 1H), 3.21 (dd, *J* = 13.7, 10.4 Hz, 1H), 3.61 (dt, *J* = 7.8, 3.1 Hz, 1H), 4.01 (dt, *J* = 10.5, 3.6 Hz, 1H), 7.06 – 7.10 (m, 1H), 7.13 – 7.18 (m, 4H), 7.32 – 7.35 (m, 2H), 7.46 – 7.49 (m, 1H), 7.66 – 7.68 (m, 2H).

**<sup>13</sup>C{<sup>1</sup>H} NMR:** (126 MHz, CDCl<sub>3</sub>)

26.0, 26.2, 26.5, 29.3, 29.6, 32.7, 40.8, 50.1, 76.2, 126.3, 128.4, 128.5, 128.7, 129.1, 133.3, 137.3, 140.1, 205.3.

**IR ν<sub>max</sub>:** (neat)

3498 (w, br), 2924 (s), 2854 (m), 1663 (s).

**HRMS:** (*m/z*, ESI<sup>+</sup>)

Requires: 323.2006 (C<sub>22</sub>H<sub>27</sub>O<sub>2</sub>, [M + H]<sup>+</sup>), Found: 323.2006

## 2-Benzyl-3-hydroxy-4,4-dimethyl-1-phenylpentan-1-one (3f)

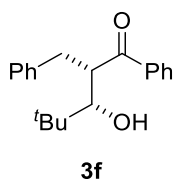

Following General Procedure B, (*E*)-chalcone (100 mg, 0.50 mmol, 1.0 equiv.), trimethylacetaldehyde (0.16 mL, 1.5 mmol, 3 equiv.), [H-*B*-9-BBN]<sub>2</sub> (5 mg, 0.02 mmol, 4 mol%), HBpin (0.22 mL, 1.5 mmol, 3 equiv.) and THF (4 mL, 0.125 M) gave crude product (75:25 *d.r.*) that was purified by flash column chromatography (hexane:ethyl acetate, 99:1 to 90:10) to give the β-hydroxy ketone product **3f** as an amorphous white solid (30 mg, 0.10 mmol, 20%, >95:5 *d.r.*).

**<sup>1</sup>H NMR:** (500 MHz, CDCl<sub>3</sub>)

1.02 (s, 9H), 2.46 (d, *J* = 3.8 Hz, 1H), 3.14 (dd, *J* = 13.7, 10.6 Hz, 1H), 3.27 (dd, *J* = 13.7, 3.7 Hz, 1H), 3.63 (app. t, *J* = 3.7 Hz, 1H), 4.03 (app. dt, *J* = 10.6, 3.7 Hz, 1H), 7.03 – 7.06 (m, 1H), 7.09 – 7.13 (m, 4H), 7.29 – 7.32 (m, 2H), 7.43 – 7.46 (m, 1H), 7.63 – 7.65 (m, 2H).

**<sup>13</sup>C{<sup>1</sup>H} NMR:** (126 MHz, CDCl<sub>3</sub>)

27.1, 34.8, 36.4, 49.5, 78.6, 126.3, 128.4, 128.5, 128.6, 129.1, 133.1, 137.3, 140.0, 205.2.

**IR ν<sub>max</sub>:** (neat)

3458 (w, br), 2956 (m), 2928 (w), 2869 (w), 1667 (s).

**HRMS:** (*m/z*, ESI<sup>+</sup>)

Requires: 297.1849 (C<sub>20</sub>H<sub>25</sub>O<sub>2</sub>, [M + H]<sup>+</sup>), Found: 297.1835 (−4.71 ppm)

## 2-Benzyl-3-hydroxy-5,5-dimethyl-1-phenylhexan-1-one (3g)

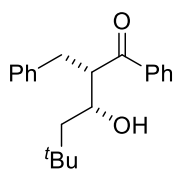

**3g**

Following General Procedure B, (*E*)-chalcone (100 mg, 0.50 mmol, 1.0 equiv.), 3,3-dimethylbutanal (0.19 mL, 1.5 mmol, 3 equiv.), [H-*B*-9-BBN]<sub>2</sub> (5 mg, 0.02 mmol, 4 mol%), HBpin (0.22 mL, 1.5 mmol, 3 equiv.) and THF (4 mL, 0.125 M) gave crude product (>95:5 *d.r.*) that was purified by flash column chromatography (hexane:ethyl acetate, 99:1 to 90:10) to give the  $\beta$ -hydroxy ketone product **3g** as an amorphous white solid (100 mg, 0.32 mmol, 64%, >95:5 *d.r.*).

**<sup>1</sup>H NMR:** (500 MHz, CDCl<sub>3</sub>)

0.97 (s, 9H), 1.41 (d, *J* = 14.5 Hz, 1H), 1.58 (dd, *J* = 14.5, 8.6 Hz, 1H), 2.58 (d, *J* = 2.2 Hz, 1H), 3.08 – 3.20 (m, 2H), 3.73 (dt, *J* = 10.0, 4.1 Hz, 1H), 4.08 – 4.11 (m, 1H), 7.06 – 7.09 (m, 1H), 7.12 – 7.17 (m, 4H), 7.31 – 7.34 (m, 2H), 7.46 – 7.49 (m, 1H), 7.66 – 7.68 (m, 2H).

**<sup>13</sup>C{<sup>1</sup>H} NMR:** (126 MHz, CDCl<sub>3</sub>)

30.2, 30.6, 33.8, 49.2, 55.1, 69.8, 126.3, 128.4, 128.5, 128.6, 129.1, 133.3, 137.6, 139.8, 205.2.

Spectroscopic data were in accordance with those previously reported.<sup>13</sup>

## 2-Benzyl-3-hydroxy-5,9-dimethyl-1-phenyldec-8-en-1-one (3h)

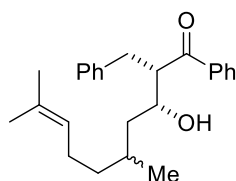

**3h**

Following General Procedure B, (*E*)-chalcone (100 mg, 0.50 mmol, 1.0 equiv.), ( $\pm$ )-citronellal (0.27 mL, 1.5 mmol, 3 equiv.), [H-B-9-BBN]<sub>2</sub> (5 mg, 0.02 mmol, 4 mol%), HBpin (0.22 mL, 1.5 mmol, 3 equiv.) and THF (4 mL, 0.125 M) gave crude product (1:1 *d.r.*) that was purified by flash column chromatography (hexane:ethyl acetate, 99:1 to 90:10) to give the  $\beta$ -hydroxy ketone product **3h** as a colourless oil (160 mg, 0.45 mmol, 90%, 1:1 *d.r.*). The product was a mixture of inseparable diastereomers.

**<sup>1</sup>H NMR:** (500 MHz, CDCl<sub>3</sub>)

0.90 (d, *J* = 6.0 Hz, 3H), 0.92 (d, *J* = 6.0 Hz, 3H), 1.13 – 1.22 (m, 3H), 1.26 – 1.34 (m, 1H), 1.37 – 1.44 (m, 1H), 1.48 – 1.51 (m, 2H), 1.59 (d, *J* = 8.5 Hz, 6H), 1.64 – 1.72 (m, 9H), 1.95 – 2.05 (m, 4H), 2.56 (br s, 1H), 2.71 (br s, 1H), 3.07 – 3.18 (m, 4H), 3.74 – 3.79 (m, 2H), 4.04 – 4.05 (m, 2H), 5.06 – 5.12 (m, 2H), 7.06 – 7.09 (m, 2H), 7.11 – 7.17 (m, 8H), 7.32 – 7.35 (m, 4H), 7.46 – 7.49 (m, 2H), 7.67 – 7.69 (m, 4H).

**<sup>13</sup>C{<sup>1</sup>H} NMR:** (126 MHz, CDCl<sub>3</sub>)

17.8, 17.8, 19.1, 20.4, 25.5, 25.6, 25.9, 25.9, 25.9, 29.2, 29.6, 33.4, 33.9, 36.7, 37.9, 42.2, 42.4, 53.2, 60.0, 70.0, 70.2, 124.8, 126.3, 128.5, 128.5, 128.6, 128.6, 128.6, 129.1, 131.5, 131.6, 133.3, 133.3, 137.5, 137.6, 139.8, 139.9, 205.1, 205.3.

**IR  $\nu_{\max}$ :** (neat)

3675 (w, br), 2989 (m), 2971 (m), 2911 (m), 1901 (m), 1671 (s).

**HRMS:** (*m/z*, ESI<sup>+</sup>)

Requires: 365.2475 (C<sub>25</sub>H<sub>33</sub>O<sub>2</sub>, [M + H]<sup>+</sup>), Found: 365.2472 (-0.85 ppm)

## 2-Benzyl-1-(4-fluorophenyl)-3-hydroxy-5-methylhexan-1-one (3i)

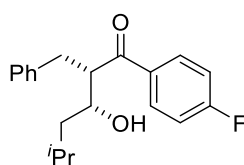

Following General Procedure B, (*E*)-1-(4-fluorophenyl)-3-phenylprop-2-en-1-one (110 mg, 0.50 mmol, 1.0 equiv.), isovaleraldehyde (0.16 mL, 1.5 mmol, 3 equiv.), [H-*B*-9-BBN]<sub>2</sub> (5 mg, 0.02 mmol, 4 mol%), HBpin (0.22 mL, 1.5 mmol, 3 equiv.) and THF (4 mL, 0.125 M) gave crude product (>95:5 *d.r.*) that was purified by flash column chromatography (hexane:ethyl acetate, 99:1 to 90:10) to give the β-hydroxy ketone product **3i** as a colourless oil (130 mg, 0.42 mmol, 84%, >95:5 *d.r.*).

**<sup>1</sup>H NMR:** (500 MHz, CDCl<sub>3</sub>)

0.90 – 0.94 (m, 6H), 1.23 – 1.29 (m, 1H), 1.56 – 1.62 (m, 1H), 1.82 – 1.89 (m, 1H), 2.71 (br s, 1H), 3.11 – 3.13 (m, 2H), 3.69 – 3.72 (m, 1H), 4.00 – 4.04 (m, 1H), 6.96 – 6.99 (m, 2H), 7.07 – 7.11 (m, 3H), 7.14 – 7.17 (m, 2H), 7.67 – 7.70 (m, 2H).

**<sup>13</sup>C{<sup>1</sup>H} NMR:** (126 MHz, CDCl<sub>3</sub>)

21.9, 23.6, 24.9, 34.1, 44.1, 53.9, 70.3, 115.7 (d, *J* = 21.4 Hz), 126.4, 128.6, 129.1, 131.2 (d, *J* = 10.8 Hz), 134.1 (d, *J* = 2.5 Hz), 139.6, 165.9 (d, *J* = 252.0 Hz), 203.7.

**<sup>19</sup>F{<sup>1</sup>H} NMR:** (470 MHz, CDCl<sub>3</sub>)

-104.7.

**IR ν<sub>max</sub>:** (neat)

3450 (w, br), 2957 (w), 2931 (w), 2870 (w), 1668 (s), 1596 (s).

**HRMS:** (*m/z*, ESI<sup>+</sup>)

Requires: 315.1755 (C<sub>20</sub>H<sub>24</sub>FO<sub>2</sub>, [M + H]<sup>+</sup>), Found: 315.1756 (0.36 ppm)

## 2-Benzyl-3-hydroxy-1-(4-iodophenyl)-5-methylhexan-1-one (3j)

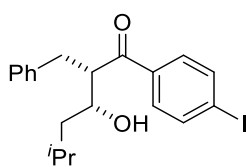

**3j**

Following General Procedure B, (*E*)-1-(4-iodophenyl)-3-phenylprop-2-en-1-one (170 mg, 0.50 mmol, 1.0 equiv.), isovaleraldehyde (0.16 mL, 1.5 mmol, 3 equiv.), [H-*B*-9-BBN]<sub>2</sub> (5 mg, 0.02 mmol, 4 mol%), HBpin (0.22 mL, 1.5 mmol, 3 equiv.) and THF (4 mL, 0.125 M) gave crude product (>95:5 *d.r.*) that was purified by flash column chromatography (hexane:ethyl acetate, 99:1 to 90:10) to give the β-hydroxy ketone product **3j** as an amorphous white solid (100 mg, 0.23 mmol, 46%, >95:5 *d.r.*).

**<sup>1</sup>H NMR:** (500 MHz, CDCl<sub>3</sub>)

0.91 (d, *J* = 6.6 Hz, 3H), 0.93 (d, *J* = 6.7 Hz, 3H), 1.23 – 1.27 (m, 1H), 1.54– 1.59 (m, 1H), 1.80 – 1.84 (m, 1H), 2.57 (d, *J* = 3.7 Hz, 1H), 3.11 (d, *J* = 7.2 Hz, 2H), 3.68 (td, *J* = 7.2, 4.1 Hz, 1H), 3.98 – 4.02 (m, 1H), 7.08 – 7.11 (m, 3H), 7.15 – 7.18 (m, 2H), 7.34 – 7.37 (m, 2H), 7.67 – 7.69 (m, 2H).

**<sup>13</sup>C{<sup>1</sup>H} NMR:** (126 MHz, CDCl<sub>3</sub>)

21.9, 23.7, 24.9, 34.0, 44.1, 54.0, 70.4, 101.5, 126.5, 128.7, 129.1, 129.8, 136.9, 137.9, 139.6, 204.5.

**IR ν<sub>max</sub>:** (neat)

3466 (w, br), 2956 (w), 2931 (w), 2870 (w), 1668 (m), 1579 (m).

**HRMS:** (*m/z*, ESI<sup>+</sup>)

Requires: 423.0816 (C<sub>20</sub>H<sub>24</sub>I<sub>2</sub>O<sub>2</sub>, [M + H]<sup>+</sup>), Found: 423.0826 (+2.48 ppm)

### 3-Hydroxy-5-methyl-2-(4-(methylthio)benzyl)-1-phenylhexan-1-one (3k)

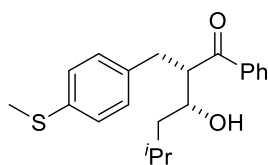

**3k**

Following General Procedure B, (*E*)-3-(4-(methylthio)phenyl)-1-phenylprop-2-en-1-one (130 mg, 0.50 mmol, 1.0 equiv), isovaleraldehyde (0.16 mL, 1.5 mmol, 3 equiv.), [H-B-9-BBN]<sub>2</sub> (5 mg, 0.02 mmol, 4 mol%), HBpin (0.22 mL, 1.5 mmol, 3 equiv.) and THF (4 mL, 0.125 M) gave crude product (>95:5 *d.r.*) that was purified by flash column chromatography (hexane:ethyl acetate, 99:1 to 90:10) to give the β-hydroxy ketone product **3k** as an amorphous white solid (130 mg, 0.39 mmol, 78%, >95:5 *d.r.*).

**<sup>1</sup>H NMR:** (500 MHz, CDCl<sub>3</sub>)

0.91 (d, *J* = 6.6 Hz, 3H), 0.93 (d, *J* = 6.7 Hz, 3H), 1.24 – 1.29 (m, 1H), 1.56 – 1.61 (m, 1H), 1.79 – 1.84 (m, 1H), 2.39 (s, 3H), 2.52 (d, *J* = 4.5 Hz, 1H), 3.10 – 3.15 (m, 2H), 3.72 – 3.76 (m, 1H), 3.99 – 4.03 (m, 1H), 7.03 – 7.08 (m, 4H), 7.34 – 7.37 (m, 2H), 7.48 – 7.51 (m, 1H), 7.69 – 7.71 (m, 2H).

**<sup>13</sup>C{<sup>1</sup>H} NMR:** (126 MHz, CDCl<sub>3</sub>)

16.4, 22.0, 23.6, 25.0, 33.1, 44.1, 53.7, 70.3, 127.3, 128.5, 128.7, 129.7, 133.4, 136.0, 136.9, 137.4, 205.0.

**IR *v*<sub>max</sub>:** (neat)

3513 (s), 3395 (w, br), 2962 (m), 2929 (m), 2902 (m), 2868 (w), 1657 (s).

**HRMS:** (*m/z*, ESI<sup>+</sup>)

Requires: 343.1726 (C<sub>21</sub>H<sub>27</sub>O<sub>2</sub>S, [M + H]<sup>+</sup>), Found: 343.1730 (+1.08 ppm)

## 2-(2,4-Dimethoxy-6-methylbenzyl)-3-hydroxy-5-methyl-1-phenylhexan-1-one (3I)

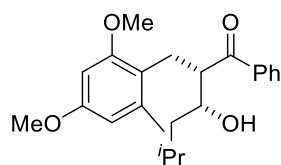

3I

Following General Procedure B, (*E*)-3-(2,4-dimethoxy-6-methylphenyl)-1-phenylprop-2-en-1-one (140 mg, 0.50 mmol, 1.0 equiv.), isovaleraldehyde (0.16 mL, 1.5 mmol, 3 equiv.), [H-B-9-BBN]<sub>2</sub> (5 mg, 0.02 mmol, 4 mol%), HBpin (0.22 mL, 1.5 mmol, 3 equiv.) and THF (4 mL, 0.125 M) gave crude product (90:10 *d.r.*) that was purified by flash column chromatography (hexane:ethyl acetate, 99:1 to 90:10) to give the β-hydroxy ketone product **3I** as an amorphous white solid (170 mg, 0.46 mmol, 91%, >95:5 *d.r.*).

**<sup>1</sup>H NMR:** (500 MHz, CDCl<sub>3</sub>)

0.92 (d, *J* = 6.7 Hz, 6H), 1.25 – 1.30 (m, 1H), 1.60 – 1.65 (m, 1H), 1.85 – 1.87 (m, 1H), 2.21 (s, 3H), 3.05 – 3.11 (m, 2H), 3.36 (d, *J* = 3.0 Hz, 1H), 3.62 (s, 3H), 3.70 (s, 3H), 3.73 – 3.76 (m, 1H), 4.04 – 4.08 (m, 1H), 6.11 (d, *J* = 2.5 Hz, 1H), 6.17 (d, *J* = 2.5 Hz, 1H), 7.27 – 7.30 (m, 2H), 7.42 – 7.46 (m, 1H), 7.61 – 7.63 (m, 2H).

**<sup>13</sup>C{<sup>1</sup>H} NMR:** (126 MHz, CDCl<sub>3</sub>)

20.4, 22.2, 23.6, 24.3, 24.9, 43.8, 49.9, 55.1, 55.4, 70.6, 96.0, 106.7, 119.0, 128.3, 128.3, 133.1, 137.5, 138.3, 158.6, 158.8, 207.1.

**IR ν<sub>max</sub>:** (neat)

3482 (w, br), 2956 (w), 2870 (w), 2838 (w), 1661 (m), 1595 (m).

**HRMS:** (*m/z*, ESI<sup>+</sup>)

Requires: 371.2217 (C<sub>23</sub>H<sub>31</sub>O<sub>4</sub>, [M + H]<sup>+</sup>), Found: 371.2207 (-2.66 ppm)

### 3-Hydroxy-5-methyl-2-(4-phenoxybenzyl)-1-phenylhexan-1-one (3m)

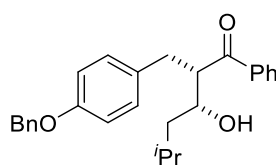

**3m**

Following General Procedure B, (*E*)-3-(4-phenoxyphenyl)-1-phenylprop-2-en-1-one (150 mg, 0.50 mmol, 1.0 equiv.), isovaleraldehyde (0.16 mL, 1.5 mmol, 3 equiv.), [H-B-9-BBN]<sub>2</sub> (5 mg, 0.02 mmol, 4 mol%), HBpin (0.22 mL, 1.5 mmol, 3 equiv.) and THF (4 mL, 0.125 M) gave crude product (>95:5 *d.r.*) that was purified by flash column chromatography (hexane:ethyl acetate, 99:1 to 90:10) to give β-hydroxy ketone product **3m** as an amorphous white solid (120 mg, 0.30 mmol, 59%, >95:5 *d.r.*).

**<sup>1</sup>H NMR:** (500 MHz, CDCl<sub>3</sub>)

0.91 (d, *J* = 6.6 Hz, 3H), 0.93 (d, *J* = 6.7 Hz, 3H), 1.24 – 1.29 (m, 1H), 1.56 – 1.62 (m, 1H), 1.78 – 1.86 (m, 1H), 2.63 (br s, 1H), 3.06 – 3.15 (m, 2H), 3.72 – 3.75 (m, 1H), 4.01 – 4.02 (m, 1H), 4.90 – 4.96 (m, 2H), 6.69 – 6.75 (m, 3H), 7.05 – 7.08 (m, 1H), 7.29 – 7.37 (m, 7H), 7.47 – 7.51 (m, 1H), 7.67 – 7.69 (m, 2H).

**<sup>13</sup>C{<sup>1</sup>H} NMR:** (126 MHz, CDCl<sub>3</sub>)

22.0, 23.6, 24.9, 33.8, 44.1, 53.5, 70.0, 70.2, 112.9, 115.7, 121.8, 127.5, 128.0, 128.7, 129.6, 133.3, 137.2, 137.6, 141.5, 158.9, 205.2.

**IR ν<sub>max</sub>:** (neat)

3484 (m), 3032 (w), 2956 (m), 2943 (m), 2962 (m), 2901 (m), 2867 (w), 1658 (s).

**HRMS:** (*m/z*, ESI<sup>+</sup>)

Requires: 403.2268 (C<sub>27</sub>H<sub>31</sub>O<sub>3</sub>, [M + H]<sup>+</sup>), Found: 403.2270 (+0.57 ppm)

### Methyl 4-(2-benzoyl-3-hydroxy-5-methylhexyl)benzoate (**3n**)

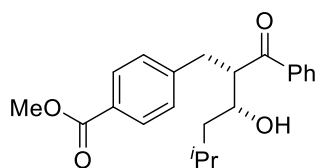

**3n**

Following General Procedure B, methyl (*E*)-4-(3-oxo-3-phenylprop-1-en-1-yl)benzoate (130 mg, 0.50 mmol, 1.0 equiv.), isovaleraldehyde (0.16 mL, 1.5 mmol, 3 equiv.), [H-*B*-9-BBN]<sub>2</sub> (5 mg, 0.02 mmol, 4 mol%), HBpin (0.22 mL, 1.5 mmol, 3 equiv.) and THF (4 mL, 0.125 M) gave crude product (94:6 *d.r.*) that was purified by flash column chromatography (hexane:ethyl acetate, 99:1 to 90:10) to give the β-hydroxy ketone product **3n** as an amorphous white solid (110 mg, 0.31 mmol, 61%, >95:5 *d.r.*).

**<sup>1</sup>H NMR:** (600 MHz, CDCl<sub>3</sub>)

0.91 (d, *J* = 6.6 Hz, 3H), 0.93 (d, *J* = 6.7 Hz, 3H), 1.24 – 1.29 (m, 1H), 1.57 – 1.61 (m, 1H), 1.79 – 1.86 (m, 1H), 2.54 (d, *J* = 4.3 Hz, 1H), 3.13 – 3.24 (m, 2H), 3.76 – 3.79 (m, 1H), 3.85 (s, 3H), 4.01 – 4.04 (m, 1H), 7.19 – 7.20 (m, 2H), 7.33 – 7.35 (m, 2H), 7.47 – 7.50 (m, 1H), 7.67 – 7.69 (m, 2H), 7.82 – 7.84 (m, 2H).

**<sup>13</sup>C{<sup>1</sup>H} NMR:** (126 MHz, CDCl<sub>3</sub>)

21.9, 23.6, 25.0, 33.7, 44.2, 52.1, 53.5, 70.3, 128.3, 128.4, 128.8, 129.2, 129.9, 133.6, 137.3, 145.5, 167.1, 204.5.

**IR  $\nu_{\max}$ :** (neat)

3454 (m, br), 2955 (w), 2935 (w), 2899 (w), 1697 (s), 1668 (s), 1432 (m), 1282 (s).

**HRMS:** (*m/z*, ESI<sup>+</sup>)

Requires: 355.1904 (C<sub>22</sub>H<sub>27</sub>O<sub>4</sub>, [M + H]<sup>+</sup>), Found: 355.1892 (−3.35 ppm)

### 3-hydroxy-1-(4-methoxyphenyl)-5-methyl-2-(4-nitrobenzyl)hexan-1-one (3o)

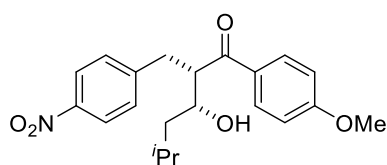

Following General Procedure B, (*E*)-1-(4-methoxyphenyl)-3-(4-nitrophenyl)prop-2-en-1-one (140 mg, 0.50 mmol, 1.0 equiv.), isovaleraldehyde (0.16 mL, 1.5 mmol, 3 equiv.), [H-B-9-BBN]<sub>2</sub> (5 mg, 0.02 mmol, 4 mol%), HBpin (0.22 mL, 1.5 mmol, 3 equiv.) and THF (4 mL, 0.125 M) gave crude product (>95:5 *d.r.*) that was purified by flash column chromatography (hexane:ethyl acetate, 99:1 to 90:10) to give the β-hydroxy ketone product **3o** as a colourless oil (100 mg, 0.28 mmol, 55%, >95:5 *d.r.*).

**<sup>1</sup>H NMR:** (500 MHz, CDCl<sub>3</sub>)

0.91 (d, *J* = 6.6 Hz, 3H), 0.93 (d, *J* = 6.7 Hz, 3H), 1.24 – 1.28 (m, 1H), 1.57 – 1.62 (m, 1H), 1.79 – 1.87 (m, 1H), 2.57 (d, *J* = 2.5 Hz, 1H), 3.17 (dd, *J* = 13.5, 4.0 Hz, 1H), 3.28 (dd, *J* = 13.6, 10.4 Hz, 1H), 3.70 – 3.73 (m, 1H), 3.82 (s, 3H), 4.00 – 4.04 (m, 1H), 6.81 – 6.84 (m, 2H), 7.27 – 7.29 (m, 2H), 7.68 – 7.71 (m, 2H), 8.00 – 8.02 (m, 2H).

**<sup>13</sup>C{<sup>1</sup>H} NMR:** (126 MHz, CDCl<sub>3</sub>)

21.9, 23.7, 25.0, 33.6, 44.3, 52.8, 55.7, 70.3, 114.1, 123.7, 130.0, 130.1, 130.8, 146.6, 148.1, 164.2, 202.0.

**IR ν<sub>max</sub>:** (neat)

3463 (w, br), 2956 (m), 2870 (w), 2841 (w), 1656 (m), 1596 (s), 1343 (s), 1168 (s).

**HRMS:** (*m/z*, ESI<sup>+</sup>)

Requires: 372.1805 (C<sub>21</sub>H<sub>26</sub>N<sub>1</sub>O<sub>5</sub>, [M + H]<sup>+</sup>), Found: 372.1804 (-0.40 ppm)

## 2-(Benzofuran-2-ylmethyl)-3-hydroxy-5-methyl-1-phenylhexan-1-one (3p)

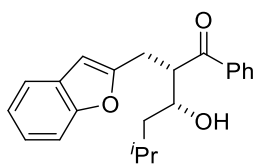

**3p**

Following General Procedure B, (*E*)-3-(benzofuran-2-yl)-1-phenylprop-2-en-1-one (120 mg, 0.50 mmol, 1.0 equiv.), isovaleraldehyde (0.16 mL, 1.5 mmol, 3 equiv.), [H-*B*-9-BBN]<sub>2</sub> (5 mg, 0.02 mmol, 4 mol%), HBpin (0.22 mL, 1.5 mmol, 3 equiv.) and THF (4 mL, 0.125 M) gave crude product (>95:5 *d.r.*) that was purified by flash column chromatography (hexane:ethyl acetate, 99:1 to 90:10) to give the β-hydroxy ketone product **3p** as an amorphous white solid (110 mg, 0.31 mmol, 61%, >95:5 *d.r.*).

**<sup>1</sup>H NMR:** (500 MHz, CDCl<sub>3</sub>)

0.91 (d, *J* = 6.6 Hz, 3H), 0.93 (d, *J* = 6.7 Hz, 3H), 1.28 – 1.33 (m, 1H), 1.57 – 1.63 (m, 1H), 1.80 – 1.89 (m, 1H), 2.66 (d, *J* = 3.3 Hz, 1H), 3.24 – 3.36 (m, 2H), 4.01 – 4.04 (m, 1H), 4.08 – 4.12 (m, 1H), 6.33 (d, *J* = 0.8 Hz, 1H), 7.10 – 7.18 (m, 2H), 7.31 – 7.33 (m, 1H), 7.36 – 7.39 (m, 3H), 7.48 – 7.51 (m, 1H), 7.87 – 7.89 (m, 2H).

**<sup>13</sup>C{<sup>1</sup>H} NMR:** (126 MHz, CDCl<sub>3</sub>)

22.0, 23.6, 24.9, 26.2, 44.0, 50.0, 69.9, 103.8, 110.8, 120.5, 122.6, 123.5, 128.6, 128.8, 128.8, 133.6, 136.9, 154.8, 156.6, 204.1.

**IR ν<sub>max</sub>:** (neat)

3440 (w, br), 2956 (m), 2931 (w), 2870 (w), 1671 (s), 1596 (m), 1252 (s).

**HRMS:** (*m/z*, ESI<sup>+</sup>)

Requires: 337.1798 (C<sub>22</sub>H<sub>25</sub>O<sub>3</sub>, [M + H]<sup>+</sup>), Found: 337.1797 (+0.36 ppm)

## 2-Benzyl-1-cyclopropyl-3-hydroxy-5-methylhexan-1-one (3q)

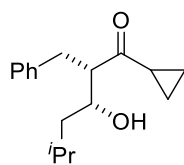

**3q**

Following General Procedure B, (*E*)-1-cyclopropyl-3-phenylprop-2-en-1-one (90 mg, 0.50 mmol, 1.0 equiv.), isovaleraldehyde (0.16 mL, 1.5 mmol, 3 equiv.), [H-*B*-9-BBN]<sub>2</sub> (5 mg, 0.02 mmol, 4 mol%), HBpin (0.22 mL, 1.5 mmol, 3 equiv.) and THF (4 mL, 0.125 M) gave crude product (>95:5 *d.r.*) that was purified by flash column chromatography (hexane:ethyl acetate, 99:1 to 90:10) to give the β-hydroxy ketone product **3q** as an amorphous white solid (100 mg, 0.40 mmol, 79%, >95:5 *d.r.*).

**<sup>1</sup>H NMR:** (500 MHz, CDCl<sub>3</sub>)

0.67 – 0.72 (m, 1H), 0.83 – 0.91 (m, 2H), 1.00 (d, *J* = 6.6 Hz, 3H), 1.02 – 1.06 (m, 4H), 1.29 – 1.34 (m, 1H), 1.61 – 1.65 (m, 1H), 1.69 – 1.73 (m, 1H), 1.86 – 1.94 (m, 1H), 2.73 (d, *J* = 3.3 Hz, 1H), 3.01 – 3.07 (m, 2H), 3.09 – 3.14 (m, 1H), 4.04 – 4.08 (m, 1H), 7.24 – 7.28 (m, 3H), 7.33 – 7.36 (m, 2H).

**<sup>13</sup>C{<sup>1</sup>H} NMR:** (126 MHz, CDCl<sub>3</sub>)

11.7, 11.8, 22.0, 22.4, 23.7, 24.9, 33.1, 43.7, 60.0, 69.8, 126.4, 128.6, 129.1, 140.2, 215.5.

**IR  $\nu_{\max}$ :** (neat)

3418 (w, br), 2989 (m), 2961 (m), 2912 (m), 1869 (m), 1685 (s).

**HRMS:** (*m/z*, ESI<sup>+</sup>)

Requires: 261.1849 (C<sub>17</sub>H<sub>25</sub>O<sub>2</sub>, [M + H]<sup>+</sup>), Found: 261.1846 (-1.19 ppm)

#### 4-Benzyl-5-hydroxy-2,2,7-trimethyloctan-3-one (3r)

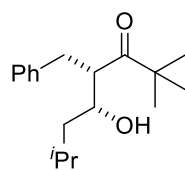

3r

Following General Procedure B, (1*E*)-4,4-dimethyl-1-phenyl-1-penten-3-one (95 mg, 0.50 mmol, 1.0 equiv.), isovaleraldehyde (0.16 mL, 1.5 mmol, 3 equiv.), [H-B-9-BBN]<sub>2</sub> (5 mg, 0.02 mmol, 4 mol%), HBpin (0.22 mL, 1.5 mmol, 3 equiv.) and THF (4 mL, 0.125 M) gave crude product (>95:5 *d.r.*) that was purified by flash column chromatography (hexane:ethyl acetate, 99:1 to 90:10) to give the β-hydroxy ketone product **3r** as a colourless oil (63 mg, 0.23 mmol, 46%, >95:5 *d.r.*).

**<sup>1</sup>H NMR:** (500 MHz, CDCl<sub>3</sub>)

0.79 (s, 9H), 0.93 (d, *J* = 6.6 Hz, 3H), 0.96 (d, *J* = 6.6 Hz, 3H), 1.23 – 1.28 (m, 1H), 1.63 – 1.69 (m, 1H), 1.76 – 1.86 (m, 1H), 2.87 (dd, *J* = 13.4, 3.9 Hz, 1H), 2.92 (br. s, 1H), 2.99 (dd, *J* = 13.4, 10.7 Hz, 1H), 3.27 (ddd, *J* = 10.7, 4.0, 1.8 Hz, 1H), 3.79 (ddd, *J* = 8.7, 4.4, 1.9 Hz, 1H), 7.09 – 7.10 (m, 2H), 7.14 – 7.17 (m, 1H), 7.21 – 7.24 (m, 2H).

**<sup>13</sup>C{<sup>1</sup>H} NMR:** (126 MHz, CDCl<sub>3</sub>)

22.3, 23.5, 25.0, 25.7, 32.5, 43.8, 52.8, 69.5, 126.5, 128.5, 129.5, 140.1, 220.9.

**IR ν<sub>max</sub>:** (neat)

3532 (w, br), 3956 (m), 2933 (m), 2869 (w), 1684 (s).

**HRMS:** (*m/z*, ESI<sup>+</sup>)

Requires: 277.2162 (C<sub>18</sub>H<sub>29</sub>O<sub>2</sub>, [M + H]<sup>+</sup>), Found: 277.2161 (-0.40 ppm)

## 2-Ethyl-3-hydroxy-1-(2,6,6-trimethylcyclohex-1-en-1-yl)octan-1-one (3s)

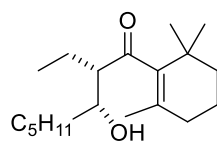

3s

Following General Procedure B, (*E*)- $\beta$ -damascone (0.10 mL, 0.50 mmol, 1.0 equiv.), hexanal (0.18 mL, 1.5 mmol, 3 equiv.), [H-B-9-BBN]<sub>2</sub> (5 mg, 0.02 mmol, 4 mol%), HBpin (0.22 mL, 1.5 mmol, 3 equiv.) and THF (4 mL, 0.125 M) gave crude product (>95:5 *d.r.*) that was purified by flash column chromatography (hexane:ethyl acetate, 99:1 to 90:10) to give the  $\beta$ -hydroxy ketone product **3s** as a colourless oil (130 mg, 0.44 mmol, 88%, >95:5 *d.r.*).

**<sup>1</sup>H NMR:** (500 MHz, CDCl<sub>3</sub>)

0.88 – 0.91 (m, 3H), 1.01 (t, *J* = 7.5 Hz, 3H), 1.07 (s, 3H), 1.16 (s, 3H), 1.29 – 1.35 (m, 5H), 1.43 – 1.45 (m, 3H), 1.49 – 1.53 (m, 1H), 1.61 (s, 3H), 1.63 – 1.73 (m, 4H), 1.74 – 1.82 (m, 1H), 2.02 – 2.04 (m, 2H), 2.67 (td, *J* = 6.1, 2.3 Hz, 1H), 2.83 (d, *J* = 4.6 Hz, 1H), 3.97 (dtd, *J* = 9.1, 4.7, 2.3 Hz, 1H)

**<sup>13</sup>C{<sup>1</sup>H} NMR:** (126 MHz, CDCl<sub>3</sub>)

13.7, 14.2, 18.1, 18.7, 21.7, 22.8, 26.3, 29.2, 29.3, 31.9, 32.0, 33.2, 34.5, 40.1, 58.1, 71.2, 134.0, 142.9, 215.5.

**IR  $\nu_{\max}$ :** (neat)

3488 (w, br), 2956 (m), 2932 (m), 2872 (w), 1664 (m), 1459 (m).

**HRMS:** (*m/z*, ESI<sup>+</sup>)

Requires: 295.2632 (C<sub>19</sub>H<sub>35</sub>O<sub>2</sub>, [M + H]<sup>+</sup>), Found: 295.2624 (-2.57 ppm)

**(3S,8R,9S,10R,13S,14S,17S)-17-Acetyl-17-((S)-1-hydroxy-3-methylbutyl)-10,13-dimethyl-2,3,4,7,8,9,10,11,12,13,14,15,16,17-tetradecahydro-1H-cyclopenta[a]-phenanthren-3-yl acetate (3t)**

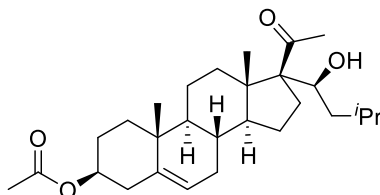

**3t**

Following General Procedure B, 16-dehydropregnenolone acetate (180 mg, 0.50 mmol, 1.0 equiv.), isovaleraldehyde (0.16 mL, 1.5 mmol, 3 equiv.), [H-B-9-BBN]<sub>2</sub> (5 mg, 0.02 mmol, 4 mol%), HBpin (0.22 mL, 1.5 mmol, 3 equiv.) and THF (4 mL, 0.125 M) gave crude product that was purified by flash column chromatography (hexane:ethyl acetate, 99:1 to 90:10) to give the title compound **3t** as an amorphous white solid (120 mg, 0.27 mmol, 53%). The product was isolated as a single diastereomer. The product was crystallised in minimal Et<sub>2</sub>O to obtain colourless, block-shaped crystals for X-ray analysis. The absolute configuration of product **3t** was supported by single crystal X-ray crystallography.

**<sup>1</sup>H NMR:** (500 MHz, CDCl<sub>3</sub>)

0.70 (s, 3H), 0.92 (m, 6H), 0.97 – 1.02 (m, 4H), 1.05 – 1.15 (m, 2H), 1.24 – 1.36 (m, 2H), 1.46 – 1.54 (m, 4H), 1.55 – 1.62 (m, 3H), 1.68 – 1.74 (m, 1H), 1.83 – 1.86 (m, 3H), 1.92 – 1.99 (m, 2H), 2.00 – 2.06 (m, 4H), 2.24 (s, 3H), 2.28 – 2.35 (m, 2H), 2.38 – 2.44 (m, 1H), 2.67 (d, *J* = 8.4 Hz, 1H), 3.82 – 3.86 (m, 1H), 4.58 – 4.62 (m, 1H), 5.36 – 5.37 (m, 1H).

**<sup>13</sup>C{<sup>1</sup>H} NMR:** (126 MHz, CDCl<sub>3</sub>)

16.7, 19.4, 20.9, 21.5, 21.6, 24.2, 25.1, 25.2, 27.8, 28.2, 32.2, 32.4, 32.5, 34.6, 36.7, 37.1, 38.2, 44.1, 47.6, 49.5, 52.0, 68.8, 72.8, 74.0, 122.3, 139.9, 170.6, 216.0.

**IR  $\nu_{\max}$ :** (neat)

3411 (w, br), 2956 (m), 2903 (m), 2825 (w), 1732 (s), 1675 (s), 1238 (s), 1031 (s).

**HRMS:** (*m/z*, ESI<sup>+</sup>)

Requires: 445.3312 (C<sub>28</sub>H<sub>45</sub>O<sub>4</sub>, [M + H]<sup>+</sup>), Found: 445.3305 (−1.66 ppm)

**$[\alpha]_D^{22}$ :** (c 1.00, CHCl<sub>3</sub>)

−93.0

**mp:** (Et<sub>2</sub>O)

139 – 140 °C

**(2-Hydroxycyclohexyl)(phenyl)methanone (6)**

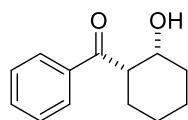

**6**

Following General Procedure B, (*E*)-7-oxo-7-phenylhept-5-enal (100 mg, 0.50 mmol, 1.0 equiv.), [H-*B*-9-BBN]<sub>2</sub> (5 mg, 0.02 mmol, 4 mol%), HBpin (0.22 mL, 1.5 mmol, 3 equiv.) and THF (4 mL, 0.125 M) gave crude product (>95:5 *d.r.*) that was purified by flash column chromatography (hexane:ethyl acetate, 99:1 to 90:10) to give the β-hydroxy ketone product **6** as a colourless oil (22 mg, 0.11 mmol, 22%, >95:5 *d.r.*).

**<sup>1</sup>H NMR:** (500 MHz, CDCl<sub>3</sub>)

1.39 - 1.48 (m, 2H), 1.72 - 2.02 (m, 6H), 3.36 (ddd, *J* = 12.1, 3.6, 2.0 Hz, 1H), 3.91 - 3.92 (m, 1H), 4.29 (br s, 1H), 7.47 - 7.50 (m, 2H), 7.57 - 7.61 (m, 1H), 7.92 - 7.94 (m, 2H).

**<sup>13</sup>C{<sup>1</sup>H} NMR:** (126 MHz, CDCl<sub>3</sub>)

19.8, 24.8, 25.8, 32.1, 48.4, 66.6, 128.6, 128.9, 133.6, 136.0, 206.2.

Spectroscopic data were in accordance with those previously reported.<sup>14</sup>

**(2-Hydroxy-2-methylcyclohexyl)(phenyl)methanone (8)**

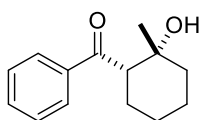

**8**

Following General Procedure B, (*E*)-1-phenyl-2-octene-1,7-dione (110 mg, 0.50 mmol, 1.0 equiv.), [H-*B*-9-BBN]<sub>2</sub> (5 mg, 0.02 mmol, 4 mol%), HBpin (0.22 mL, 1.5 mmol, 3 equiv.) and THF (4 mL, 0.125 M) gave crude product (>95:5 *d.r.*) that was purified by flash column chromatography (hexane:ethyl acetate, 99:1 to 90:10) to give the β-hydroxy ketone product **8** as a colourless oil (22 mg, 0.10 mmol, 20%, >95:5 *d.r.*).

**<sup>1</sup>H NMR:** (500 MHz, CDCl<sub>3</sub>)

1.19 (s, 3H), 1.31 – 1.35 (m, 2H), 1.51 – 1.57 (m, 1H), 1.69 – 1.86 (m, 5H), 3.31 (dd, *J* = 12.2, 3.6 Hz, 1H), 4.46 (s, 1H), 7.47 – 7.51 (m, 2H), 7.58 – 7.62 (m, 1H), 7.94 – 7.96 (m, 2H).

**<sup>13</sup>C{<sup>1</sup>H} NMR:** (126 MHz, CDCl<sub>3</sub>)

21.4, 25.7, 27.2, 29.8, 39.1, 51.6, 70.3, 128.4, 129.0, 133.8, 136.8, 207.3.

Spectroscopic data were in accordance with those previously reported.<sup>15</sup>

## 2-Benzyl-3-hydroxy-3-methyl-1-phenylbutan-1-one (10)

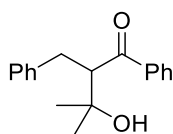

10

Following General Procedure B, (*E*)-chalcone (100 mg, 0.50 mmol, 1.0 equiv.), acetone (0.11 mL, 1.5 mmol, 3 equiv.), [H-*B*-9-BBN]<sub>2</sub> (5 mg, 0.02 mmol, 4 mol%), HBpin (0.22 mL, 1.5 mmol, 3 equiv.) and THF (4 mL, 0.125 M) gave crude product that was purified by flash column chromatography (hexane:ethyl acetate, 99:1 to 90:10) to give the β-hydroxy ketone product **10** as an amorphous white solid (110 mg, 0.43 mmol, 85%).

**<sup>1</sup>H NMR:** (500 MHz, CDCl<sub>3</sub>)

1.23 (s, 3H), 1.38 (s, 3H), 3.14 – 3.20 (m, 2H), 3.36 (s, 1H), 3.79 (dd, *J* = 8.9, 5.9 Hz, 1H), 7.02 – 7.05 (m, 1H), 7.08 – 7.13 (m, 4H), 7.26 – 7.29 (m, 2H), 7.41 – 7.45 (m, 1H), 7.57 – 7.59 (m, 2H).

**<sup>13</sup>C{<sup>1</sup>H} NMR:** (126 MHz, CDCl<sub>3</sub>)

27.9, 29.8, 35.5, 57.0, 72.5, 126.3, 128.3, 128.5, 128.6, 129.1, 133.2, 138.9, 139.6, 207.7.

**IR ν<sub>max</sub>:** (neat)

3501 (m, br), 2988 (m), 2968 (m), 2901 (m), 1655 (s).

**HRMS:** (*m/z*, ESI<sup>+</sup>)

Requires: 269.1536 (C<sub>18</sub>H<sub>21</sub>O<sub>2</sub>, [M + H]<sup>+</sup>), Found: 269.1531 (−1.89 ppm)

## 7. Unsuccessful Substrates

### $\alpha,\beta$ -Unsaturated Ketones

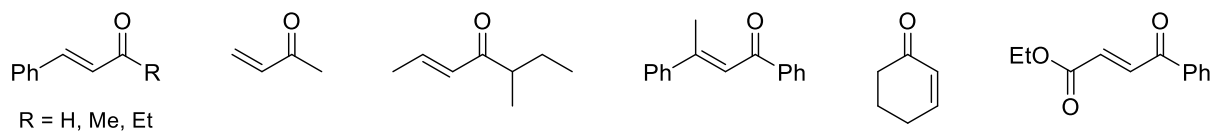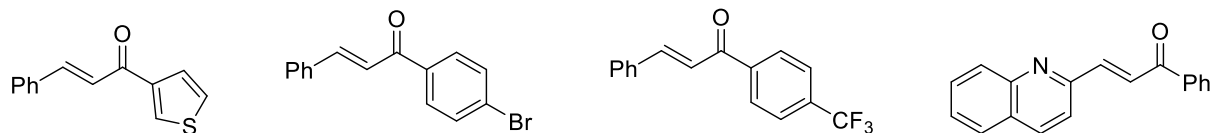

### Aldehydes

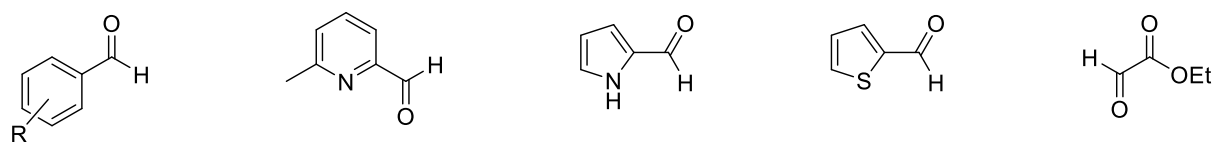

## 8. Enantioenriched Substrate Scope

### (2*S*,3*R*)-2-Benzyl-3-hydroxy-5-methyl-1-phenylhexan-1-one (3a)

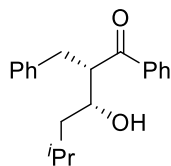

(2*S*,3*R*)-3a

Following General Procedure C, (*E*)-chalcone (100 mg, 0.50 mmol, 1.0 equiv.), isovaleraldehyde (0.16 mL, 1.5 mmol, 3 equiv.), (+)-[HB(Lgf)<sub>2</sub>]<sub>2</sub> (42 mg, 0.050 mmol, 10 mol%), HBpin (0.22 mL, 1.5 mmol, 3 equiv.) and THF (4 mL, 0.125 M) gave crude product (>95:5 *d.r.*) that was purified by flash column chromatography (hexane:ethyl acetate, 99:1 to 90:10) to give the β-hydroxy ketone product (2*S*,3*R*)-3a as an amorphous white solid (140 mg, 0.48 mmol, 96%, >95:5 *d.r.*, 90:10 *e.r.*). The product was crystallised in minimal Et<sub>2</sub>O to obtain colourless, block-shaped crystals for X-ray analysis. The absolute configuration of (2*S*,3*R*)-3a was supported by single crystal X-ray crystallography. Since the crystal used to obtain the X-ray structure was grown from a mixture of enantiomers, the crystal used to obtain the X-ray structure was analysed by HPLC to confirm it was the major enantiomer.

**Chiral HPLC:** (CHIRALPAK IB, 95:5 *n*-hexane:isopropanol, flow rate 1.0 mL/min, 244 nm, 30 °C)

*t*<sub>R</sub> (2*S*,3*R*)-3a 6.8 min, *t*<sub>R</sub> (2*R*,3*S*)-3a 9.8 min, 90:10 *e.r.*

*t*<sub>R</sub> of single crystal (2*S*,3*R*)-3a 6.7 min

[α]<sub>D</sub><sup>23</sup>: (c 1.05, CHCl<sub>3</sub>)

-41.9

**mp:** (Et<sub>2</sub>O)

93 - 95 °C

Spectroscopic data were in accordance with those reported for product 3a.

**(2S,3R)-2-Benzyl-3-cyclohexyl-3-hydroxy-1-phenylpropan-1-one (3e)**

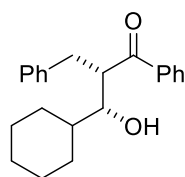

**(2S,3R)-3e**

Following General Procedure C, (*E*)-chalcone (100 mg, 0.50 mmol, 1.0 equiv.), cyclohexanecarboxaldehyde (0.18 mL, 1.5 mmol, 3 equiv.), (+)-[HB(Lgf)<sub>2</sub>]<sub>2</sub> (42 mg, 0.050 mmol, 10 mol%), HBpin (0.22 mL, 1.5 mmol, 3 equiv.) and THF (4 mL, 0.125 M) gave crude product (>95:5 *d.r.*) that was purified by flash column chromatography (hexane:ethyl acetate, 99:1 to 90:10) to give the β-hydroxy ketone product **(2S,3R)-3e** as an amorphous white solid (90 mg, 0.27 mmol, 54%, >95:5 *d.r.*, 85:15 *e.r.*).

**Chiral HPLC:** (CHIRALPAK IC, 95:5 *n*-hexane:isopropanol, flow rate 1.0 mL/min, 244 nm, 30 °C)

*t<sub>R</sub>* **(2R,3S)-3e** 10.8 min, *t<sub>R</sub>* **(2S,3R)-3e** 12.7 min, 85:15 *e.r.*

$[\alpha]_D^{23}$ : (c 1.03, CHCl<sub>3</sub>)

-10.1

Spectroscopic data were in accordance with those reported for product **3e**.

**(2S,3S)-2-Benzyl-3-hydroxy-4,4-dimethyl-1-phenylpentan-1-one (3f)**

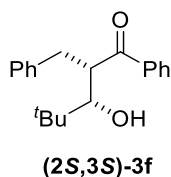

Following General Procedure C, (*E*)-chalcone (100 mg, 0.50 mmol, 1.0 equiv.), trimethylacetaldehyde (0.16 mL, 1.5 mmol, 3 equiv.), (+)-[HB(Lgf)<sub>2</sub>]<sub>2</sub> (42 mg, 0.050 mmol, 10 mol%), HBpin (0.22 mL, 1.5 mmol, 3 equiv.) and THF (4 mL, 0.125 M) gave crude product (74:26 *d.r.*) that was purified by flash column chromatography (hexane:ethyl acetate, 99:1 to 90:10) to give the β-hydroxy ketone product **(2S,3S)-3f** as an amorphous white solid (48 mg, 0.16 mmol, 32%, >95:5 *d.r.*, 86:14 *e.r.*).

**Chiral HPLC:** (CHIRALPAK IC, 95:5 *n*-hexane:isopropanol, flow rate 1.0 mL/min, 244 nm, 30 °C)

*t*<sub>R</sub> **(2R,3R)-3f** 6.7 min, *t*<sub>R</sub> **(2S,3S)-3f** 8.6 min, 86:14 *e.r.*

[α]<sub>D</sub><sup>23</sup>: (c 0.40, CHCl<sub>3</sub>)

-44.0

Spectroscopic data were in accordance with those reported for product **3f**.

**(2S,3R)-2-Benzyl-1-(4-fluorophenyl)-3-hydroxy-5-methylhexan-1-one (3i)**

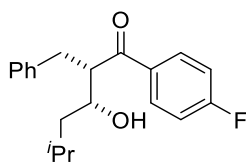

Following General Procedure C, (*E*)-1-(4-fluorophenyl)-3-phenylprop-2-en-1-one (110 mg, 0.50 mmol, 1.0 equiv.), isovaleraldehyde (0.16 mL, 1.5 mmol, 3 equiv.), (+)-[HB(Lgf)<sub>2</sub>]<sub>2</sub> (42 mg, 0.050 mmol, 10 mol%), HBpin (0.22 mL, 1.5 mmol, 3 equiv.) and THF (4 mL, 0.125 M) gave crude product (>95:5 *d.r.*) that was purified by flash column chromatography (hexane:ethyl acetate, 99:1 to 90:10) to give the β-hydroxy ketone product **(2S,3R)-3i** as an amorphous white solid (140 mg, 0.45 mmol, 89%, >95:5 *d.r.*, 85:15 *e.r.*).

**Chiral HPLC:** (CHIRALPAK IB, 95:5 *n*-hexane:isopropanol, flow rate 1.0 mL/min, 244 nm, 30 °C)

*t*<sub>R</sub> **(2S,3R)-3i** 6.9 min, *t*<sub>R</sub> **(2R,3S)-3i** 10.7 min, 85:15 *e.r.*

[α]<sub>D</sub><sup>23</sup>: (c 1.15, CHCl<sub>3</sub>)

-41.0

Spectroscopic data were in accordance with those reported for product **3i**.

**(2S,3R)-2-(2,4-Dimethoxy-6-methylbenzyl)-3-hydroxy-5-methyl-1-phenylhexan-1-one (3I)**

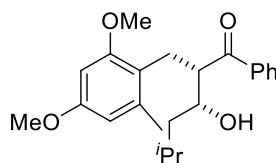

**(2S,3R)-3I**

Following General Procedure C, (*E*)-3-(2,4-dimethoxy-6-methylphenyl)-1-phenylprop-2-en-1-one (140 mg, 0.50 mmol, 1.0 equiv.), isovaleraldehyde (0.16 mL, 1.5 mmol, 3 equiv.), (+)-[HB(Lgf)<sub>2</sub>]<sub>2</sub> (42 mg, 0.050 mmol, 10 mol%), HBpin (0.22 mL, 1.5 mmol, 3 equiv.) and THF (4 mL, 0.125 M) gave crude product (93:7 *d.r.*) that was purified by flash column chromatography (hexane:ethyl acetate, 99:1 to 90:10) to give the β-hydroxy ketone product **(2S,3R)-3I** as an amorphous white solid (161 mg, 0.44 mmol, 87%, >95:5 *d.r.*, 80:20 *e.r.*).

**Chiral HPLC:** (CHIRALPAK IC, 95:5 *n*-hexane:isopropanol, flow rate 1.0 mL/min, 244 nm, 30 °C)

*t<sub>R</sub>* **(2R,3S)-3I** 12.0 min, *t<sub>R</sub>* **(2S,3R)-3I** 19.3 min, 80:20 *e.r.*

[α]<sub>D</sub><sup>23</sup>: (c 1.00, CHCl<sub>3</sub>)

-75.2

Spectroscopic data were in accordance with those reported for product **3I**.

**(2S,3R)-Methyl-4-(2-benzoyl-3-hydroxy-5-methylhexyl)benzoate (3n)**

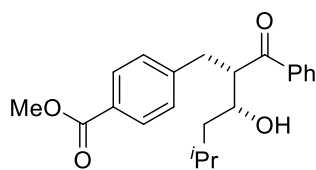

**(2S,3R)-3n**

Following General Procedure C, methyl-(*E*)-4-(3-oxo-3-phenylprop-1-en-1-yl)benzoate (130 mg, 0.50 mmol, 1.0 equiv.), isovaleraldehyde (0.16 mL, 1.5 mmol, 3 equiv.), (+)-[HB(Lgf)<sub>2</sub>]<sub>2</sub> (42 mg, 0.050 mmol, 10 mol%), HBpin (0.22 mL, 1.5 mmol, 3 equiv.) and THF (4 mL, 0.125 M) gave crude product (93:7 *d.r.*) that was purified by flash column chromatography (hexane:ethyl acetate, 99:1 to 90:10) to give the β-hydroxy ketone product **(2S,3R)-3n** as a yellow oil (80 mg, 0.23 mmol, 45%, >95:5 *d.r.*, 84:16 *e.r.*).

**Chiral HPLC:** (CHIRALPAK IC, 95:5 *n*-hexane:isopropanol, flow rate 1.0 mL/min, 244 nm, 30 °C)

*t<sub>R</sub>* **(2R,3S)-3n** 14.4 min, *t<sub>R</sub>* **(2S,3R)-3n** 18.3 min, 84:16 *e.r.*

[α]<sub>D</sub><sup>23</sup>: (c 0.45, CHCl<sub>3</sub>)

+7.1

Spectroscopic data were in accordance with those reported for product **3n**.

**(2S,3R)-2-Benzyl-1-cyclopropyl-3-hydroxy-5-methylhexan-1-one (3q)**

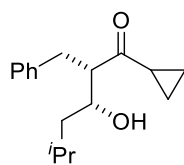

**(2S,3R)-3q**

Following General Procedure C, (*E*)-1-cyclopropyl-3-phenylprop-2-en-1-one (90 mg, 0.50 mmol, 1.0 equiv.), isovaleraldehyde (0.16 mL, 1.5 mmol, 3 equiv.), (+)-[HB(Lgf)<sub>2</sub>]<sub>2</sub> (42 mg, 0.050 mmol, 10 mol%), HBpin (0.22 mL, 1.5 mmol, 3 equiv.) and THF (4 mL, 0.125 M) gave crude product (>95:5 *d.r.*) that was purified by flash column chromatography (hexane:ethyl acetate, 99:1 to 90:10) to give the β-hydroxy ketone product **(2S,3R)-3q** as an amorphous white solid (98 mg, 0.38 mmol, 75%, >95:5 *d.r.*, 80:20 *e.r.*).

**Chiral HPLC:** (CHIRALPAK IC, 95:5 *n*-hexane:isopropanol, flow rate 1.0 mL/min, 210 nm, 30 °C)

*t*<sub>R</sub> **(2R,3S)-3q** 7.4 min, *t*<sub>R</sub> **(2S,3R)-3q** 9.0 min, 80:20 *e.r.*

[α]<sub>D</sub><sup>23</sup>: (c 1.10, CHCl<sub>3</sub>)

-40.7

Spectroscopic data were in accordance with those reported for product **3q**.

**(2S,3R)-4-Benzyl-5-hydroxy-2,2,7-trimethyloctan-3-one (3r)**

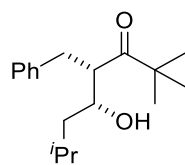

**(2S,3R)-3r**

Following General Procedure C, (1*E*)-4,4-dimethyl-1-phenyl-1-penten-3-one (95 mg, 0.50 mmol, 1.0 equiv.), isovaleraldehyde (0.16 mL, 1.5 mmol, 3 equiv.), (+)-[HB(Lgf)<sub>2</sub>]<sub>2</sub> (42 mg, 0.050 mmol, 10 mol%), HBpin (0.22 mL, 1.5 mmol, 3 equiv.) and THF (4 mL, 0.125 M) gave crude product (>95:5 *d.r.*) that was purified by flash column chromatography (hexane:ethyl acetate, 99:1 to 90:10) to give the β-hydroxy ketone product **(2S,3R)-3r** as a colourless oil (96 mg, 0.44 mmol, 87%, >95:5 *d.r.*, 72:28 *e.r.*).

**Chiral HPLC:** (CHIRALPAK IB, 95:5 *n*-hexane:isopropanol, flow rate 1.0 mL/min, 251 nm, 30 °C)

*t<sub>R</sub>* **(2S,3R)-3r** 8.3 min, *t<sub>R</sub>* **(2R,3S)-3r** 10.7 min, 72:28 *e.r.*

$[\alpha]_D^{23}$ : (c 0.97, CHCl<sub>3</sub>)

+13.2

Spectroscopic data were in accordance with those reported for product **3r**.

**(2*R*,3*R*)-2-Ethyl-3-hydroxy-1-(2,6,6-trimethylcyclohex-1-en-1-yl)octan-1-one (3s)**



**(2*R*,3*R*)-3s**

Following General Procedure C, (*E*)- $\beta$ -damascone (0.10 mL, 0.50 mmol, 1.0 equiv.), hexanal (0.18 mL, 1.5 mmol, 3 equiv.), (+)-[HB(Lgf)<sub>2</sub>]<sub>2</sub> (42 mg, 0.050 mmol, 10 mol%), HBpin (0.22 mL, 1.5 mmol, 3 equiv.) and THF (4 mL, 0.125 M) gave crude product (>95:5 *d.r.*) that was purified by flash column chromatography (hexane:ethyl acetate, 99:1 to 90:10) to give the  $\beta$ -hydroxy ketone product **(2*R*,3*R*)-3s** as a colourless oil (58 mg, 0.20 mmol, 40%, >95:5 *d.r.*, 80:20 *e.r.*).

**Chiral HPLC:** (CHIRALPAK IG, 99:1 *n*-hexane:isopropanol, flow rate 1.0 mL/min, 244 nm, 30 °C)

$t_R$  **(2*S*,3*S*)-3s** 17.2 min,  $t_R$  **(2*R*,3*R*)-3s** 18.5 min, 80:20 *e.r.*

$[\alpha]_D^{23}$ : (c 1.08, CHCl<sub>3</sub>)

-20.7

Spectroscopic data were in accordance with those reported for product **3s**.

## 9. Proposed Mechanism

The proposed mechanism is based on previous work in the Thomas group.<sup>1, 13</sup> The mechanism for the hydrolysis of the O-Bpin bond was reported by Brown.<sup>16</sup>

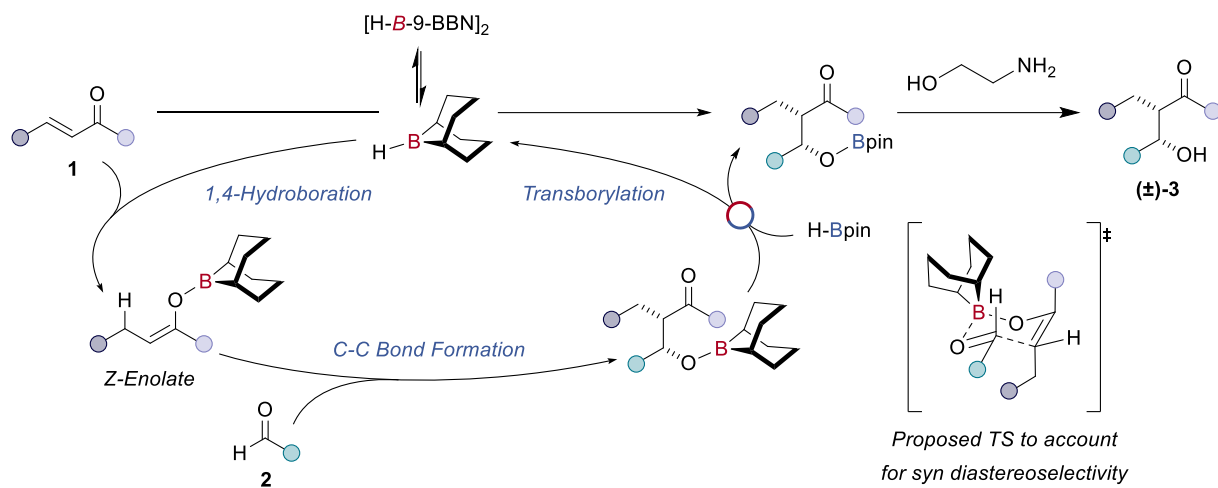

## 10. References

- (1) Nicholson, K.; Langer, T.; Thomas, S. P. Borane-Catalyzed, Chemoselective Reduction and Hydrofunctionalization of Enones Enabled by B–O Transborylation. *Org. Lett.* **2021**, *23* (7), 2498-2504.
- (2) Eastman, H.; Ryan, J.; Maciá, B.; Caprio, V.; O'Reilly, E. Alcohol Dehydrogenase-Triggered Oxa-Michael Reaction for the Asymmetric Synthesis of Disubstituted Tetrahydropyrans and Tetrahydrofurans. *ChemCatChem* **2019**, *11* (16), 3760-3762.
- (3) Wang, D.; Zhang, Y.; Harris, A.; Gautam, L. N. S.; Chen, Y.; Shi, X. Triazole-Gold-Promoted, Effective Synthesis of Enones from Propargylic Esters and Alcohols: A Catalyst Offering Chemoselectivity, Acidity and Ligand Economy. *Adv. Synth. Catal.* **2011**, *353* (14-15), 2584-2588.
- (4) Thiot, C.; Mioskowski, C.; Wagner, A. Sequential Hiyama Coupling/Narasaka Acylation Reaction of (E)-1,2-Disilylethene: Rapid Assembly of  $\alpha,\beta$ -Unsaturated Carbonyl Motifs. *Eur. J. Org. Chem.* **2009**, *2009* (19), 3219-3227.
- (5) Medici, F.; Resta, S.; Presenti, P.; Caruso, L.; Puglisi, A.; Raimondi, L.; Rossi, S.; Benaglia, M. Stereoselective Visible-Light Catalyzed Cyclization of Bis(enones): A Viable Approach to the Synthesis of Enantiomerically Enriched Cyclopentane Rings. *Eur. J. Org. Chem.* **2021**, *2021* (32), 4521-4524.
- (6) Richards, E. L.; Murphy, P. J.; Dinon, F.; Fratucello, S.; Brown, P. M.; Gelbrich, T.; Hursthouse, M. B. Assessing the scope of the tandem Michael/intramolecular aldol reaction mediated by secondary amines, thiols and phosphines. *Tetrahedron* **2001**, *57* (36), 7771-7784.
- (7) Gonzalez, A. Z.; Román, J. G.; Gonzalez, E.; Martinez, J.; Medina, J. R.; Matos, K.; Soderquist, J. A. 9-Borabicyclo[3.3.2]decanes and the Asymmetric Hydroboration of 1,1-Disubstituted Alkenes. *ACS Catal.* **2008**, *130* (29), 9218-9219. Nicholson, K.; Peng, Y.; Llopis, N.; Willcox, D. R.; Nichol, G. S.; Langer, T.; Baeza, A.; Thomas, S. P. Boron-Catalyzed, Diastereo- and Enantioselective Allylation of Ketones with Allenes. *ACS Catalysis* **2022**, *12* (17), 10887-10893.
- (8) Brown, H. C.; Desai, M. C.; Jadhav, P. K. Hydroboration. 61. Diisopinocampheylborane of high optical purity. Improved preparation and asymmetric hydroboration of representative cis-disubstituted alkenes. *J. Org. Chem.* **1982**, *47* (26), 5065-5069.
- (9) Jadhav, P. K.; Prasad, J. V. N. V.; Brown, H. C. A convenient method for upgrading the enantiomeric purities of (+)-longifolene and (+)-3-carene to materials approaching 100% ee. *J. Org. Chem.* **1985**, *50* (17), 3203-3206.
- (10) Kanno, S.; Kakiuchi, F.; Kochi, T. Palladium-Catalyzed Hydroboration/Cyclization of 1,n-Dienes. *J. Org. Chem.* **2023**, *88* (4), 2621-2630.
- (11) Macleod, J.; Thomas, S. P. Colorimetric indication of hidden catalysis. *Nat. Chem.* **2026**, *18* (1), 173-179.
- (12) Jadhav, P. K.; Brown, H. C. Dilongifolylborane: a new effective chiral hydroborating agent with intermediate steric requirements. *J. Org. Chem.* **1981**, *46* (14), 2988-2990.
- (13) Moreno González, A.; Nicholson, K.; Llopis, N.; Nichol, G. S.; Langer, T.; Baeza, A.; Thomas, S. P. Diastereoselective, Catalytic Access to Cross-Aldol Products Directly from Esters and Lactones. *Angew. Chem. Int. Ed.* **2022**, *61* (39), e202209584.

(14) Baik, T.-G.; Luis, A. L.; Wang, L.-C.; Krische, M. J. Diastereoselective Cobalt-Catalyzed Aldol and Michael Cycloreductions. *J. Am. Chem. Soc.* **2001**, *123* (21), 5112-5113.

(15) Huddleston, R. R.; Cauble, D. F.; Krische, M. J. Borane-Mediated Aldol Cycloreduction of Monoenone Monoketones: Diastereoselective Formation of Quaternary Centers. *J. Org. Chem.* **2003**, *68* (1), 11-14.

(16) Krishnamurthy, S.; Brown, H. C. Selective reductions. 22. Facile reduction of .alpha.,.beta.-unsaturated aldehydes and ketones with 9-borabicyclo[3.3.1]nonane. A remarkably convenient procedure for the selective conversion of conjugated aldehydes and ketones to the corresponding allylic alcohols in the presence of other functional groups. *J. Org. Chem.* **1977**, *42* (7), 1197-1201.

## Appendix I: $^1\text{H}$ , $^{19}\text{F}\{^1\text{H}\}$ and $^{13}\text{C}\{^1\text{H}\}$ NMR Spectra



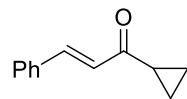

S9

$^{13}\text{C}\{^1\text{H}\}$ ,  $\text{CDCl}_3$ , 126 MHz

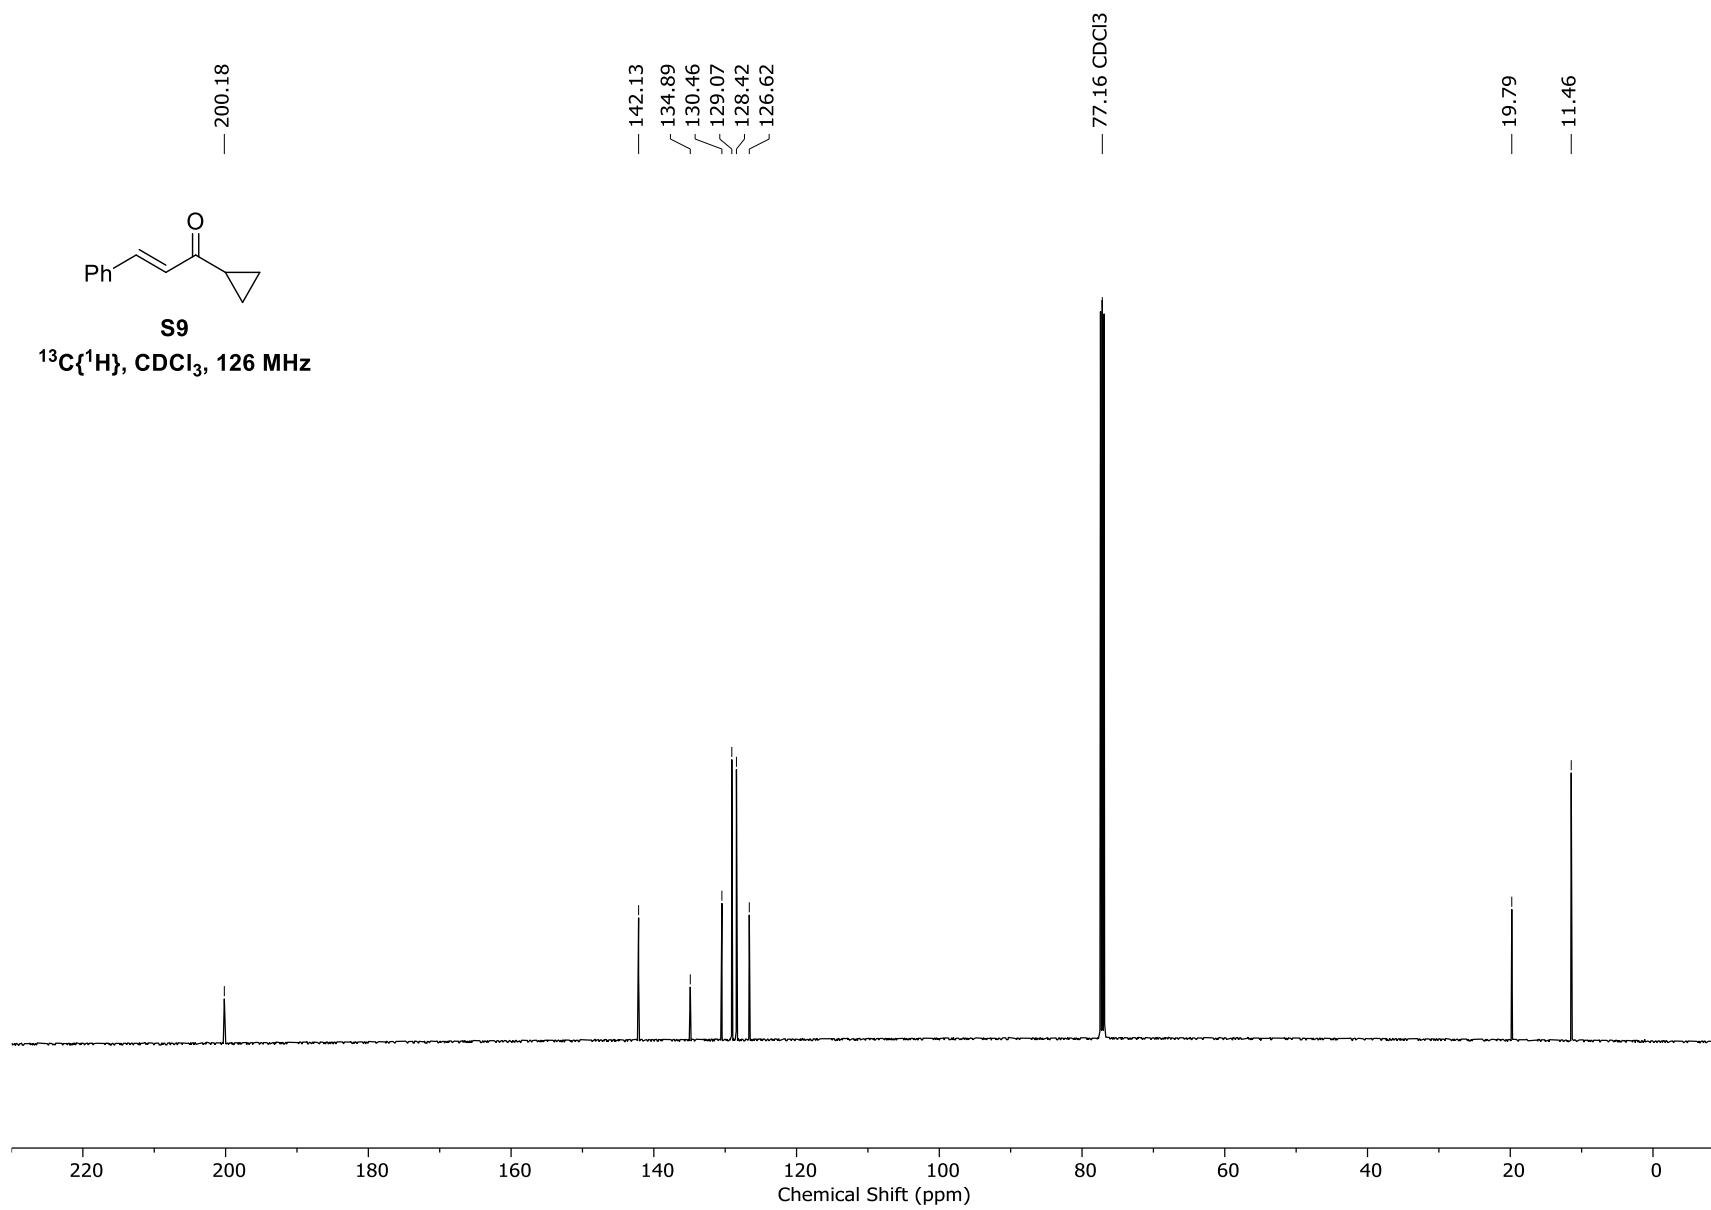

S56

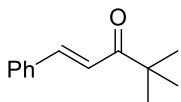

S10

<sup>1</sup>H, CDCl<sub>3</sub>, 500 MHz

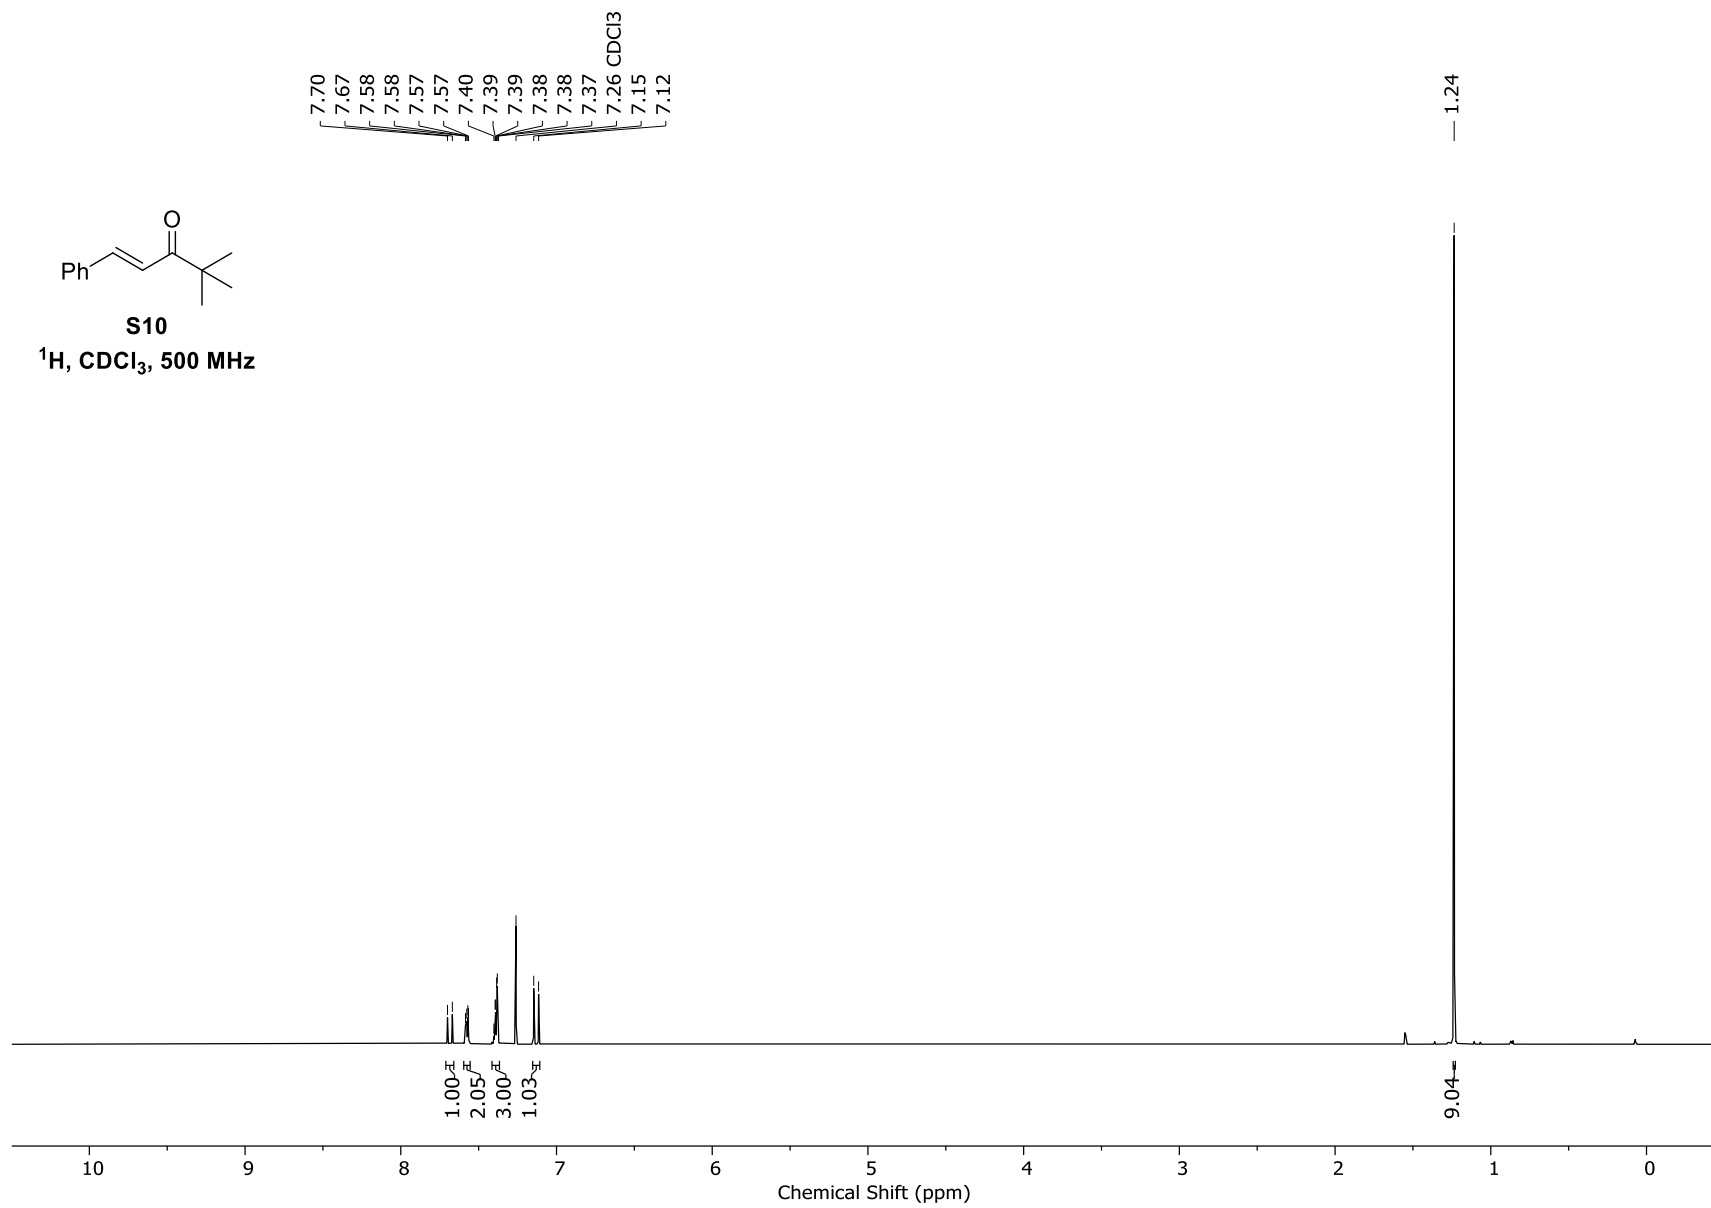

S57

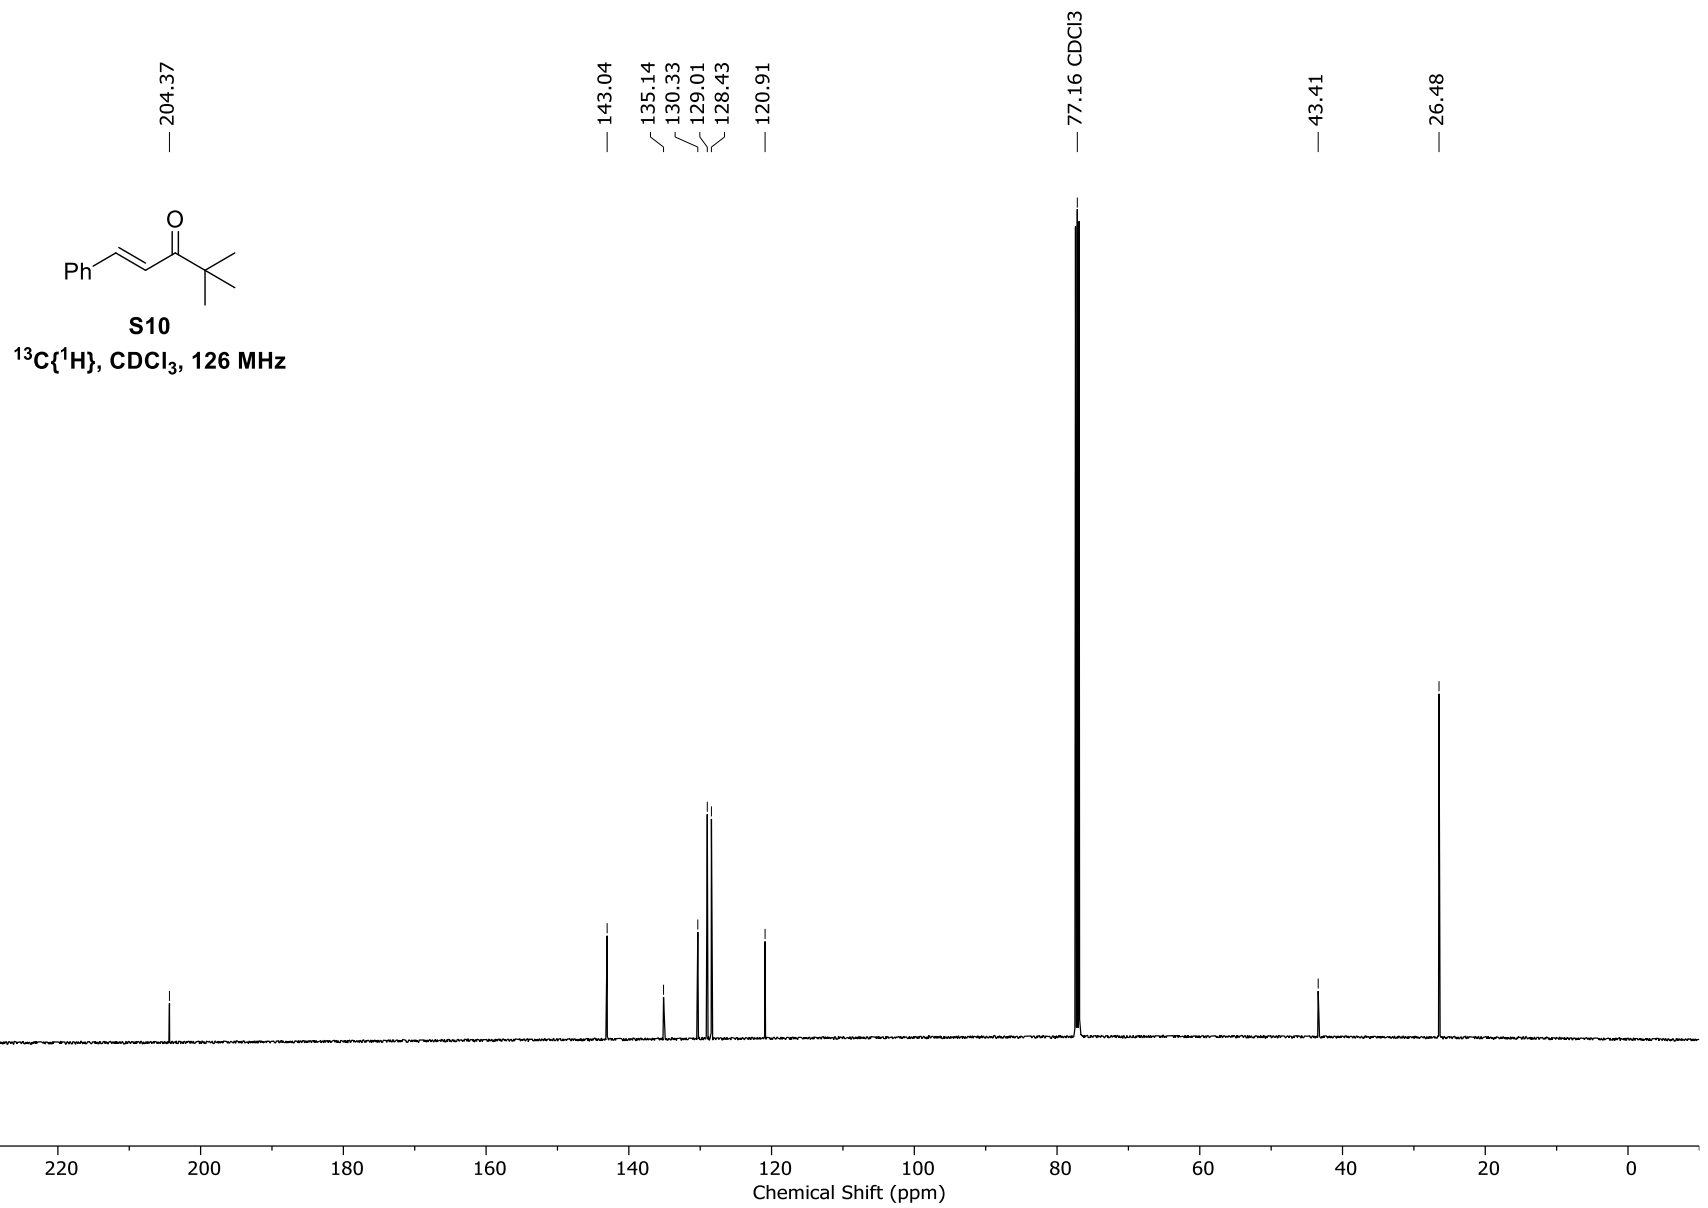

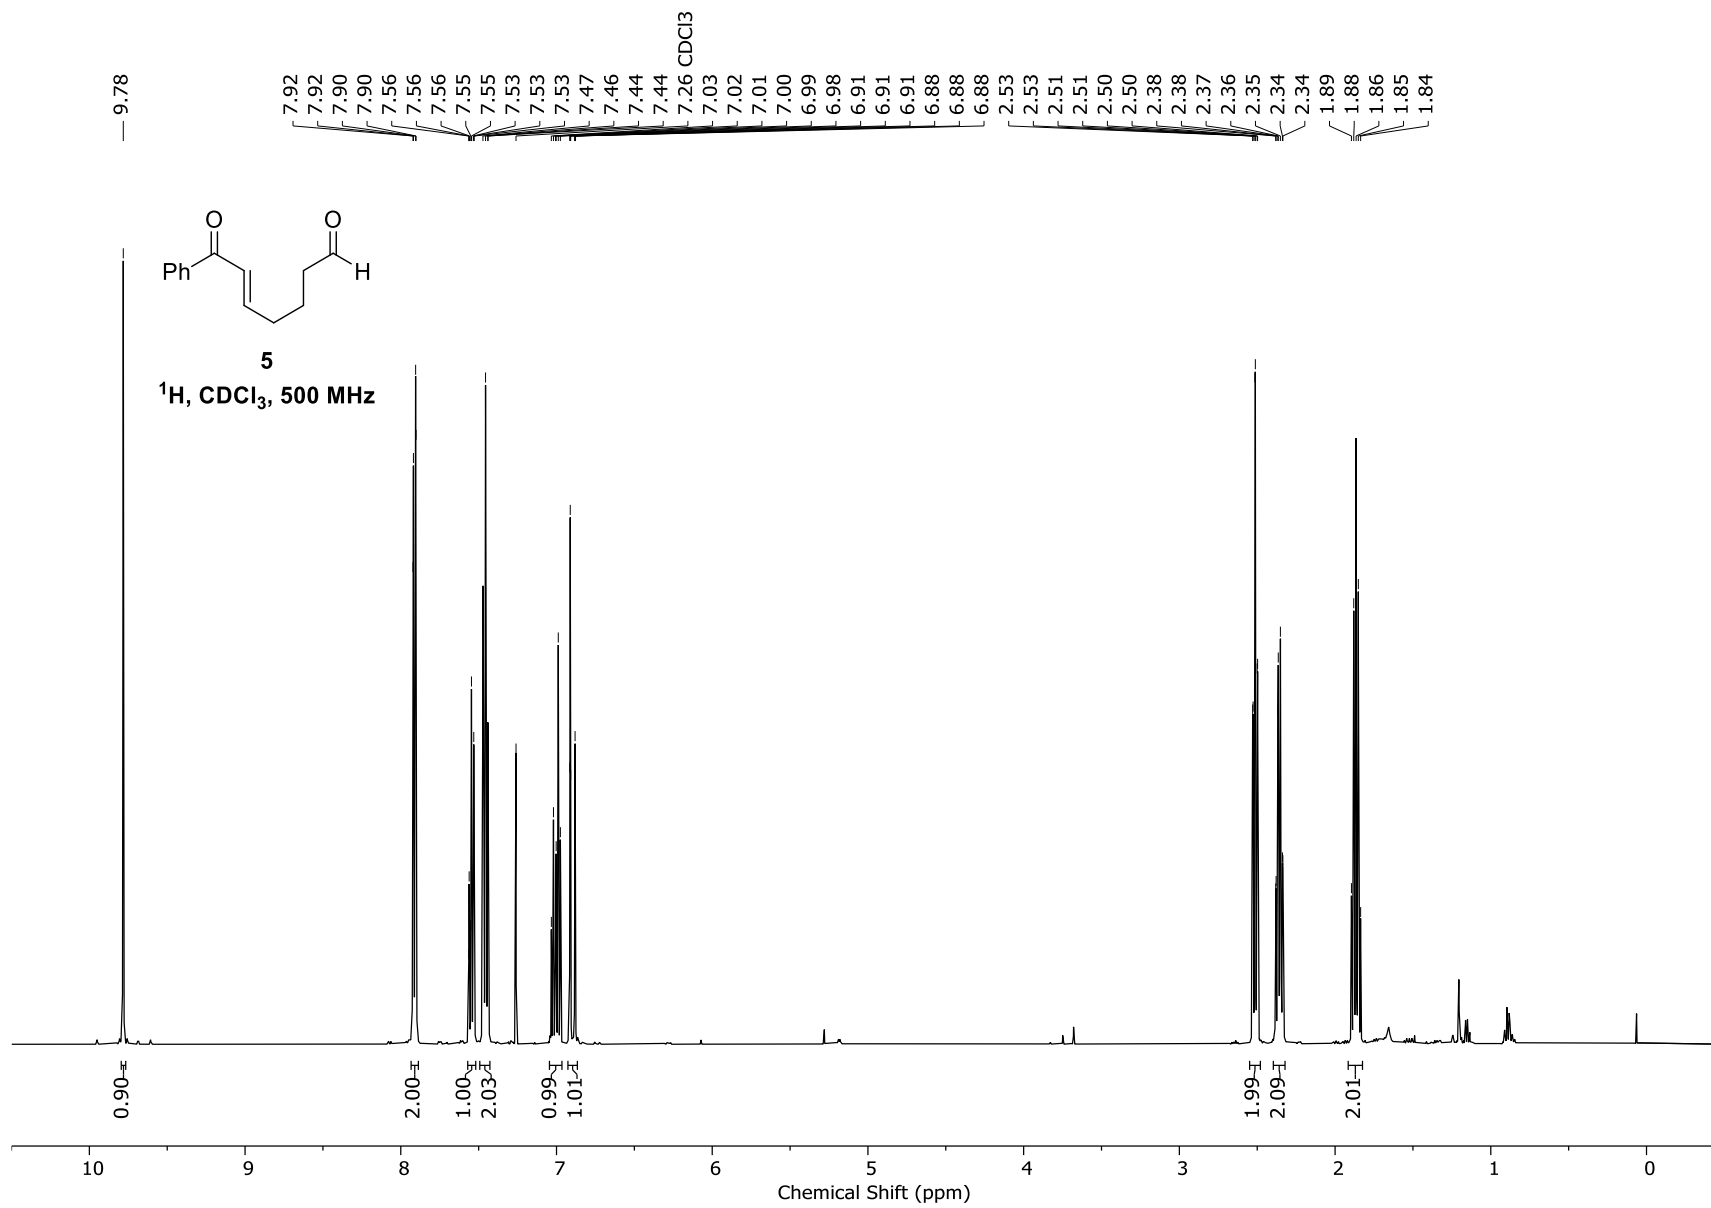

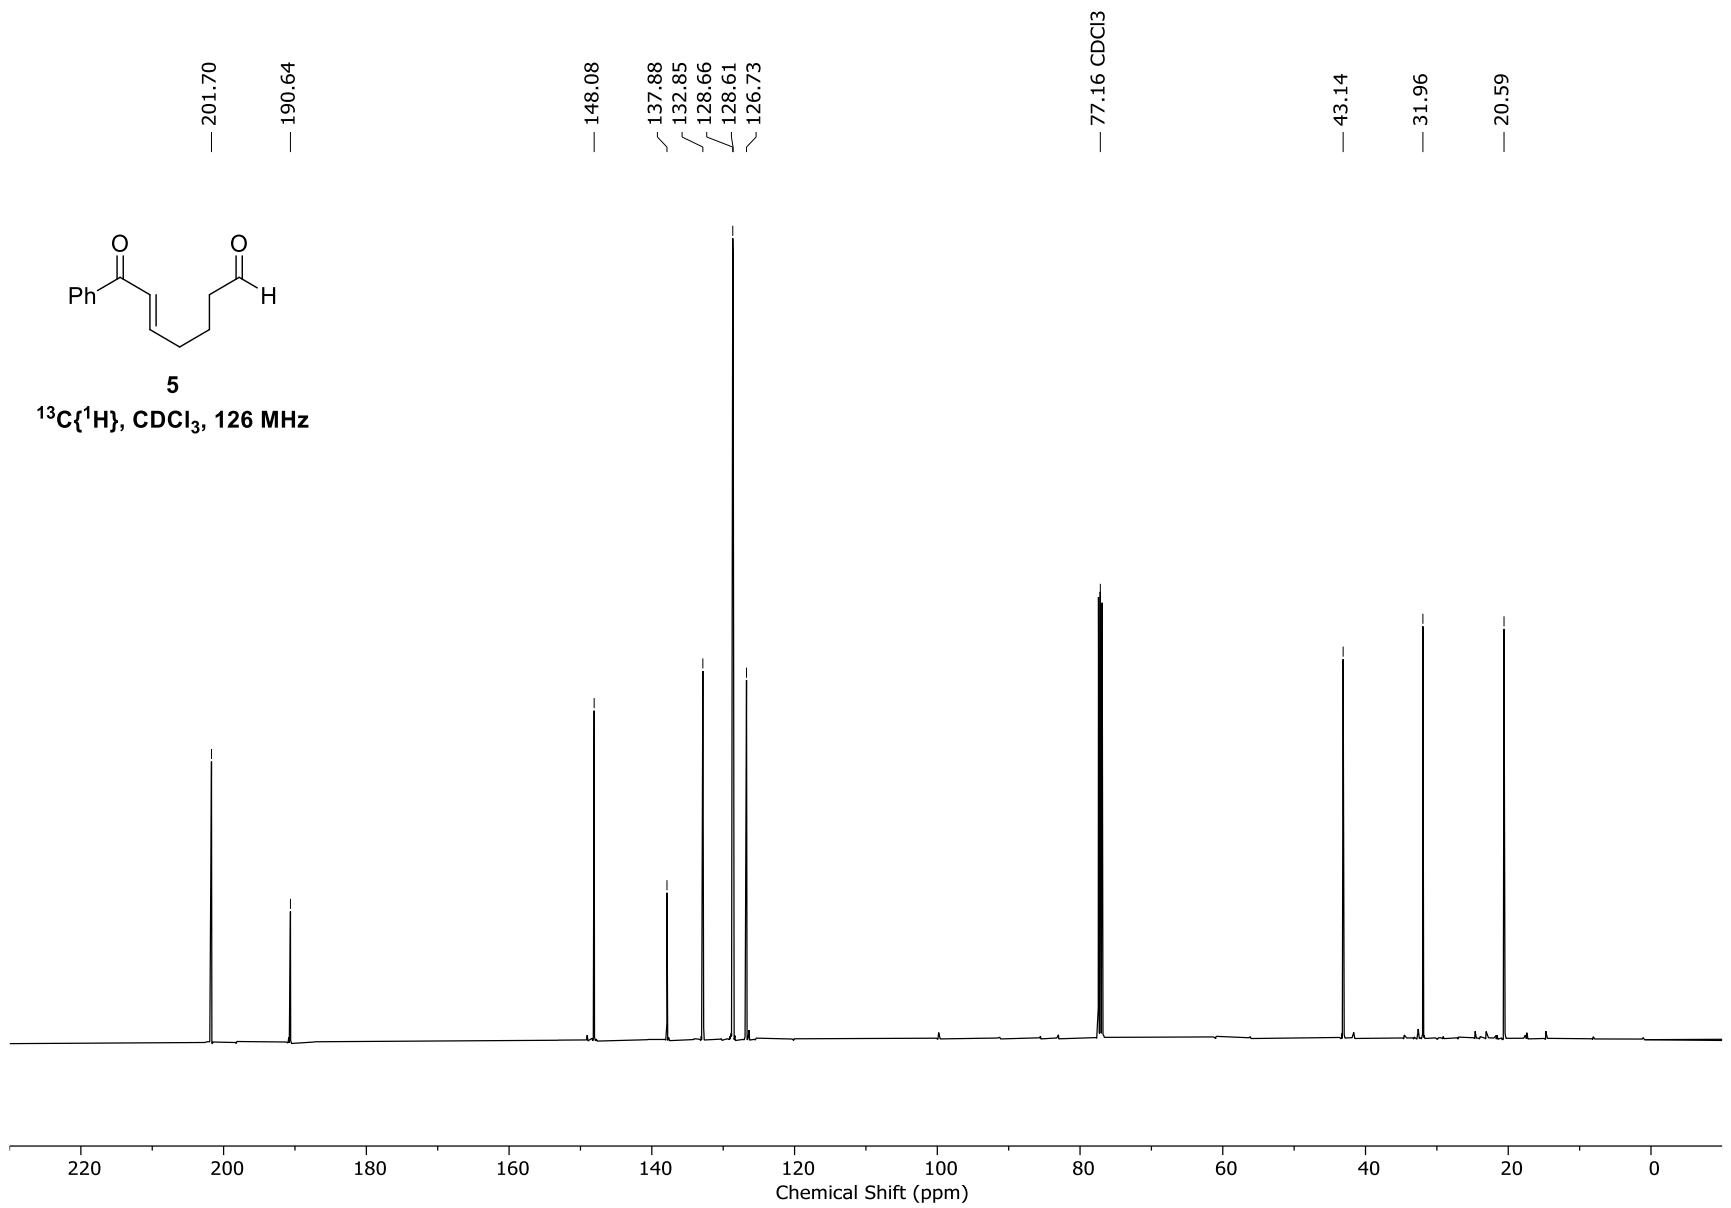

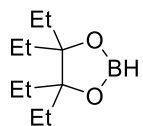

**S16**  
 $^1\text{H}$ ,  $\text{CDCl}_3$ , 500 MHz

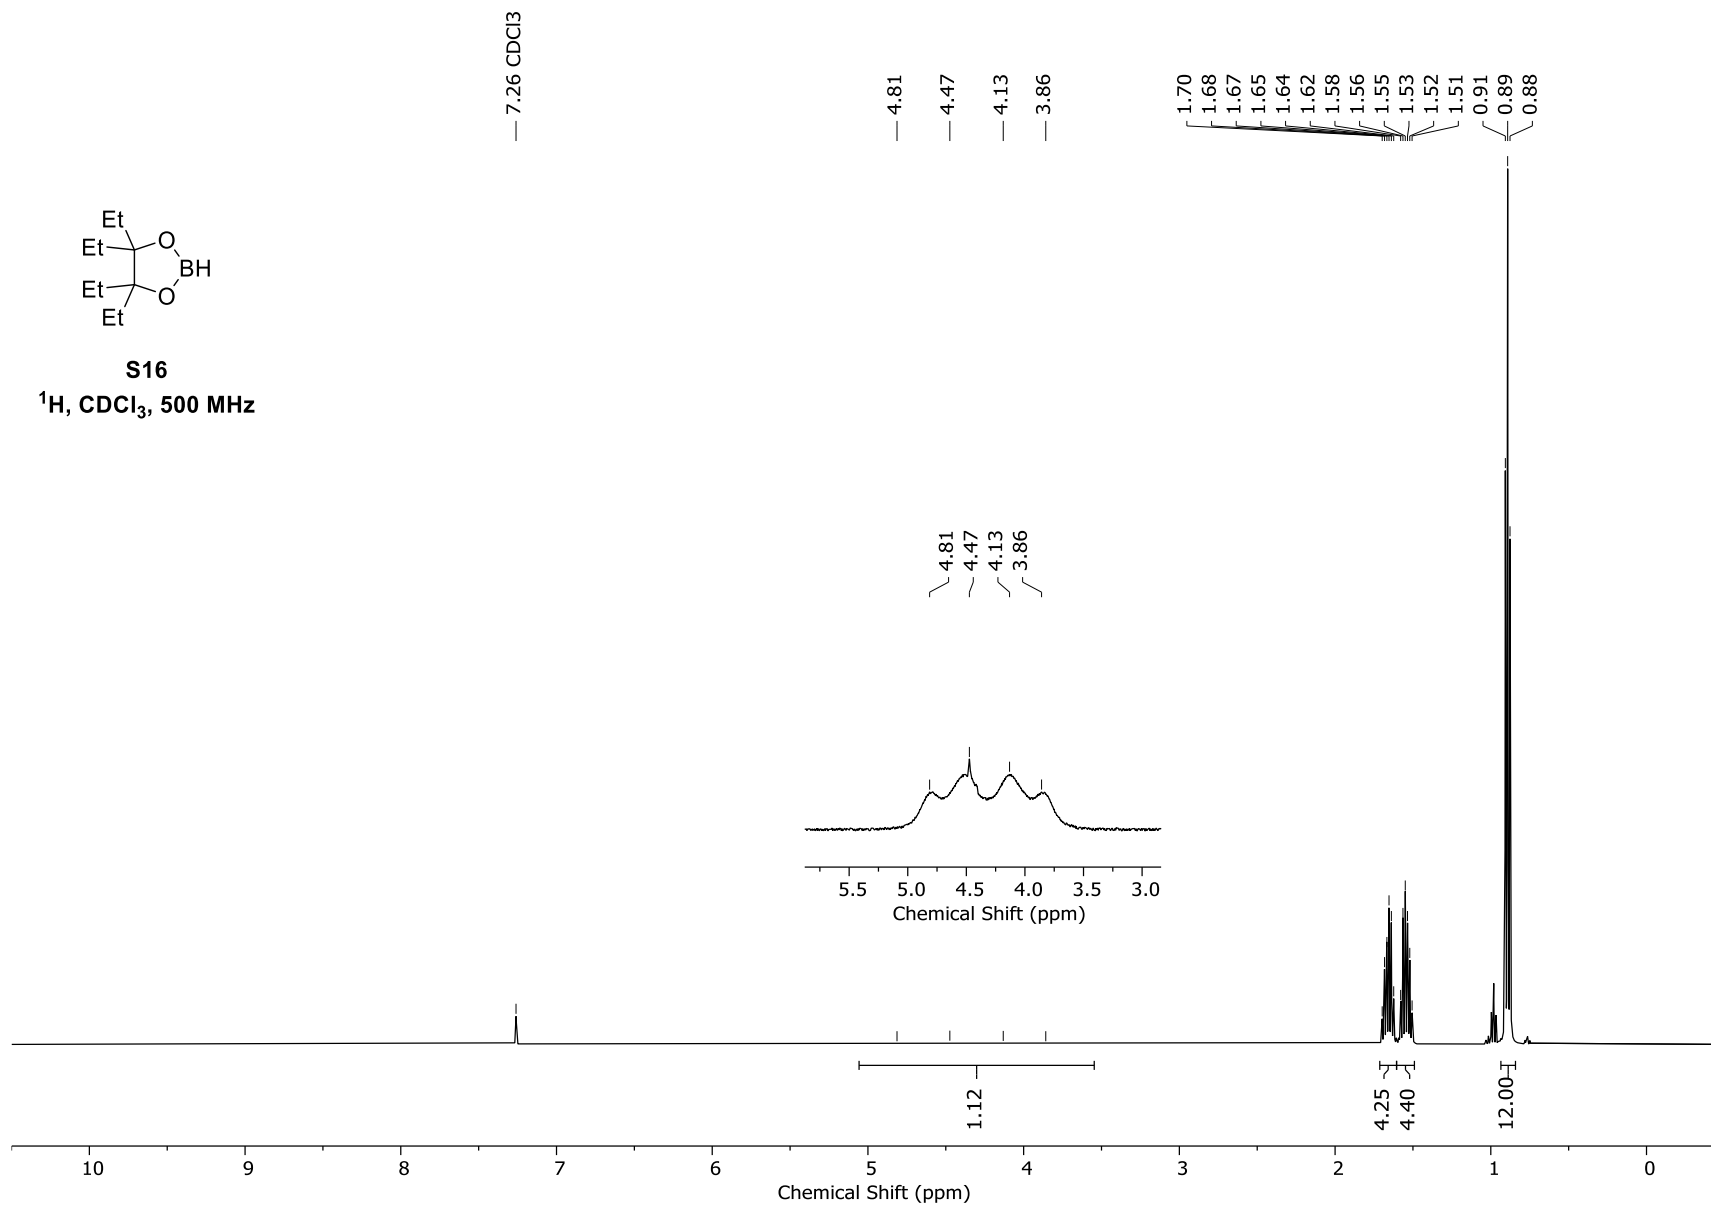

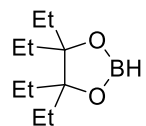

S16

$^{13}\text{C}\{^1\text{H}\}$ ,  $\text{CDCl}_3$ , 126 MHz

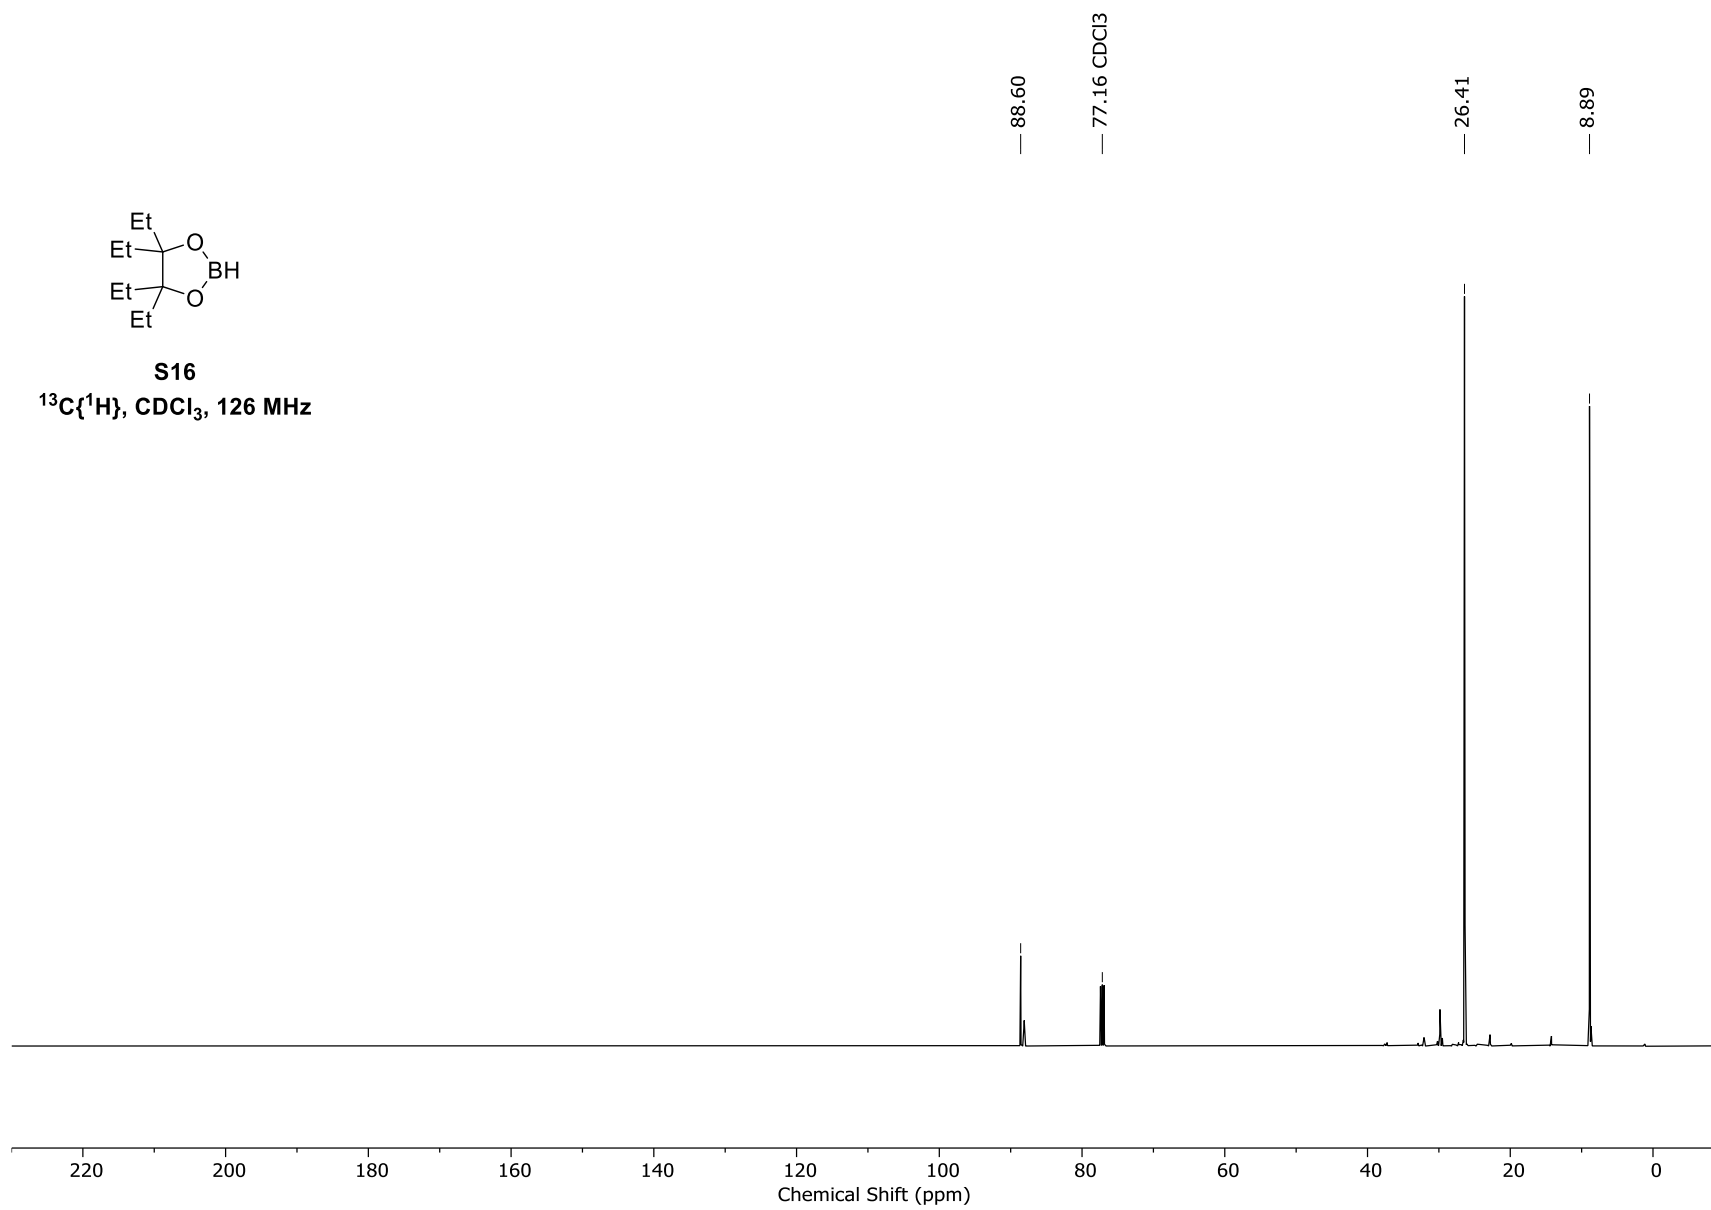

S62

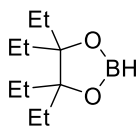

**S16**  
**<sup>11</sup>B, C<sub>6</sub>D<sub>6</sub>, 128 MHz**

28.41  
27.07

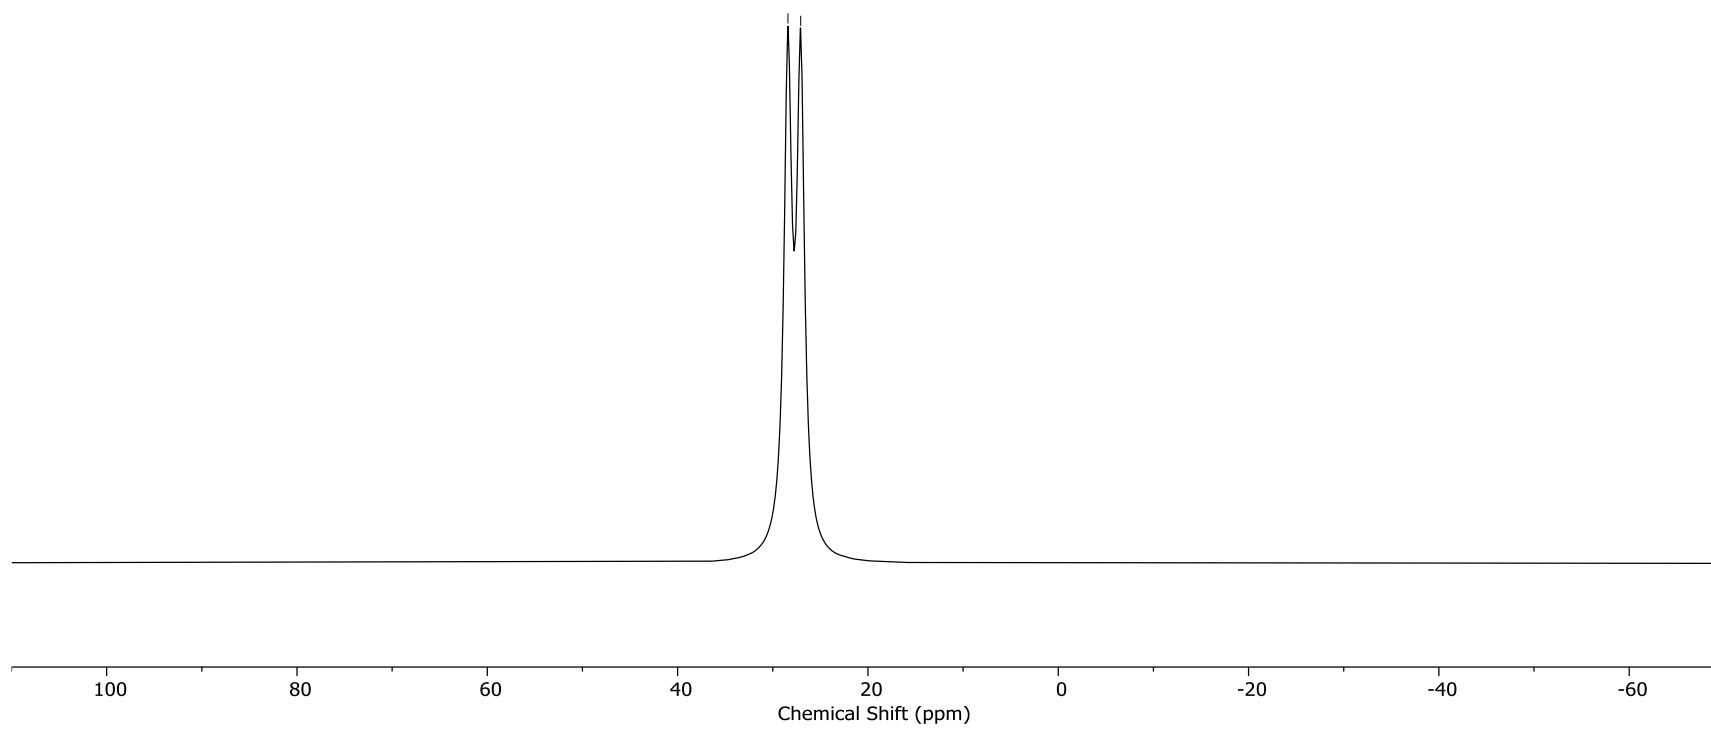

**S63**



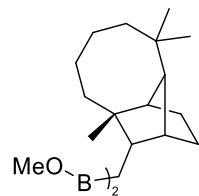

**S18**

$^{13}\text{C}\{^1\text{H}\}$ ,  $\text{CDCl}_3$ , 126 MHz

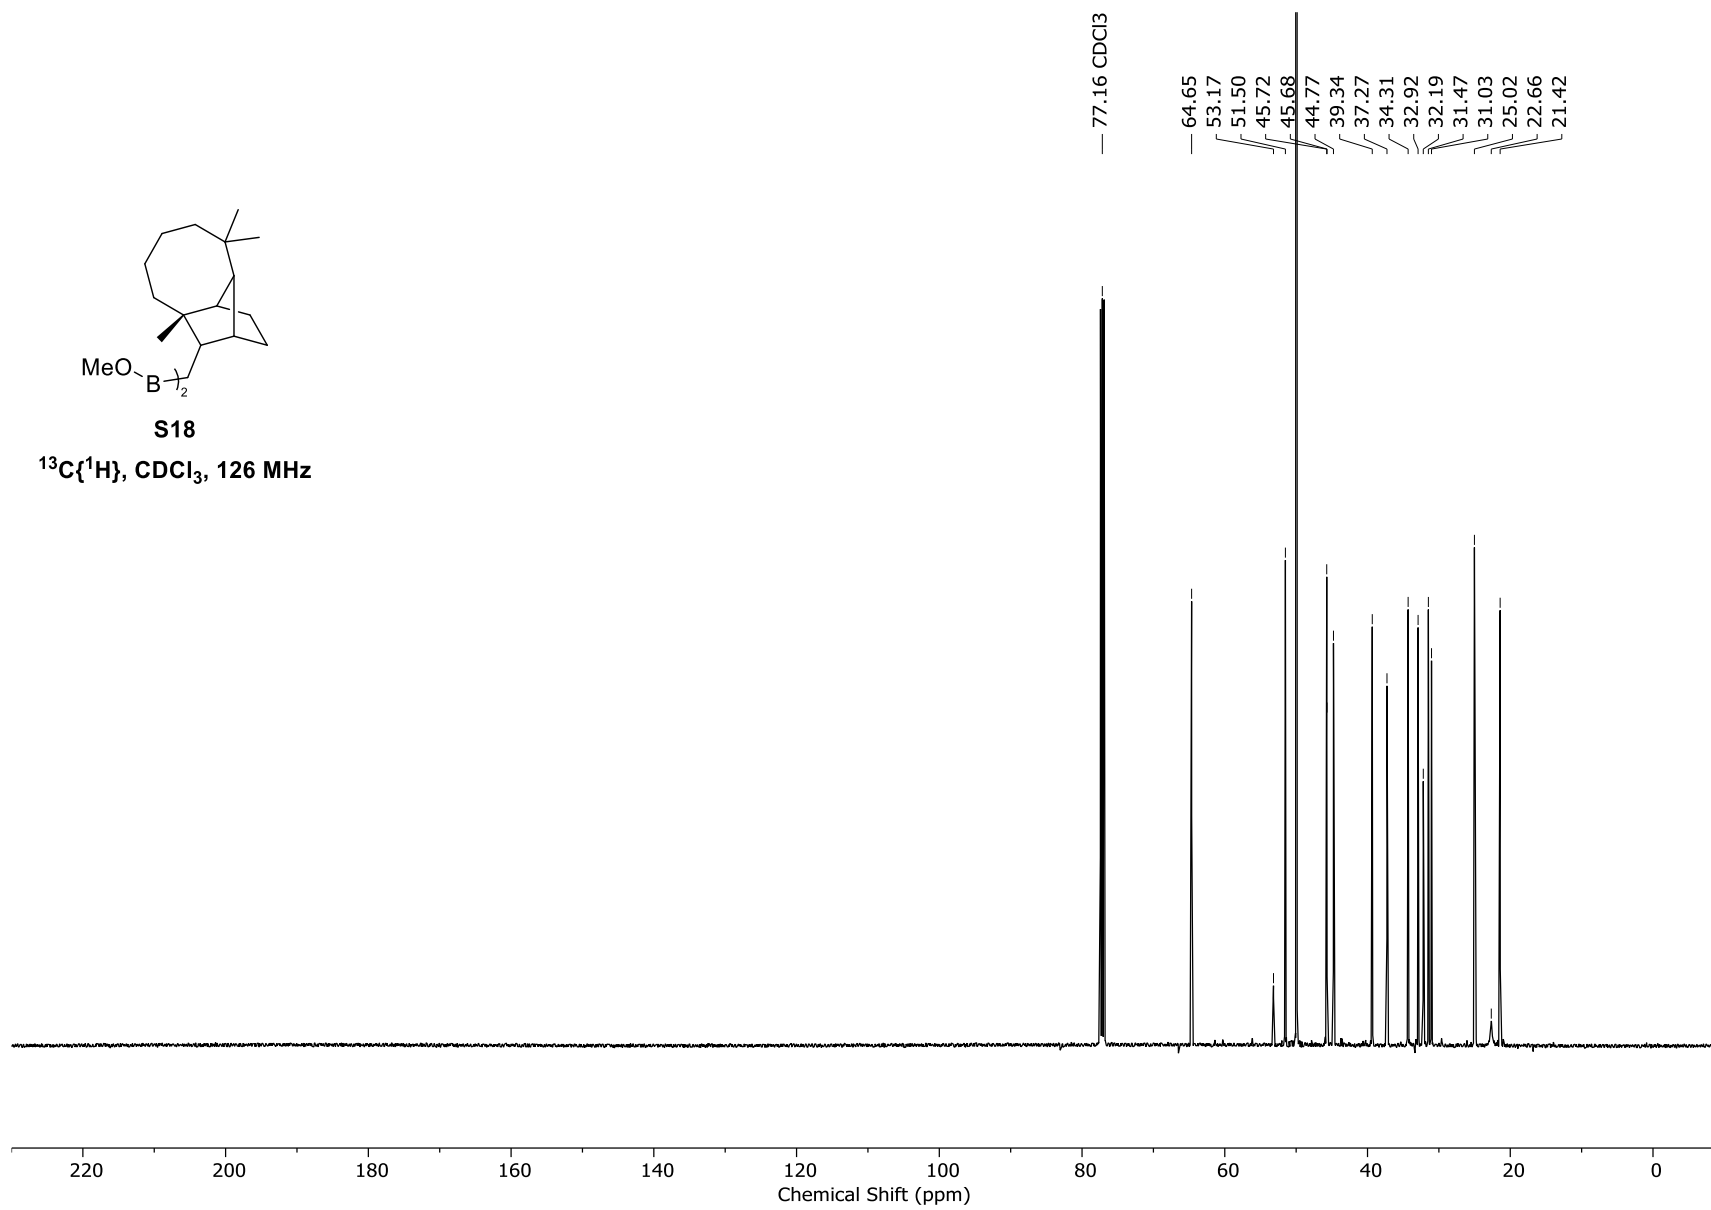

S65

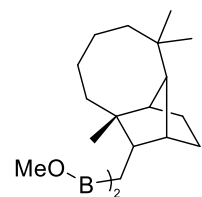

**S18**

**<sup>11</sup>B, THF, 160 MHz**

— 54.58

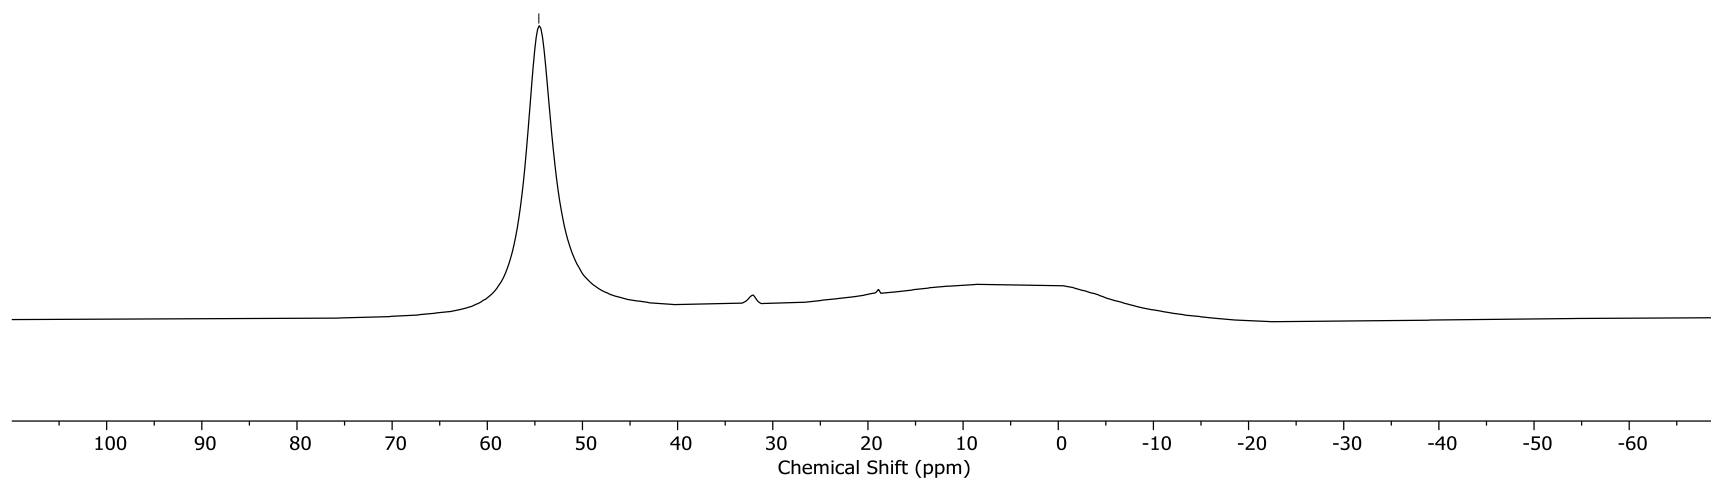

S66

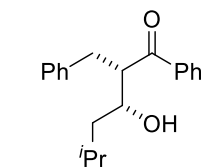

**3a**  
Crude Reaction  
<sup>1</sup>H, CDCl<sub>3</sub>, 600 MHz

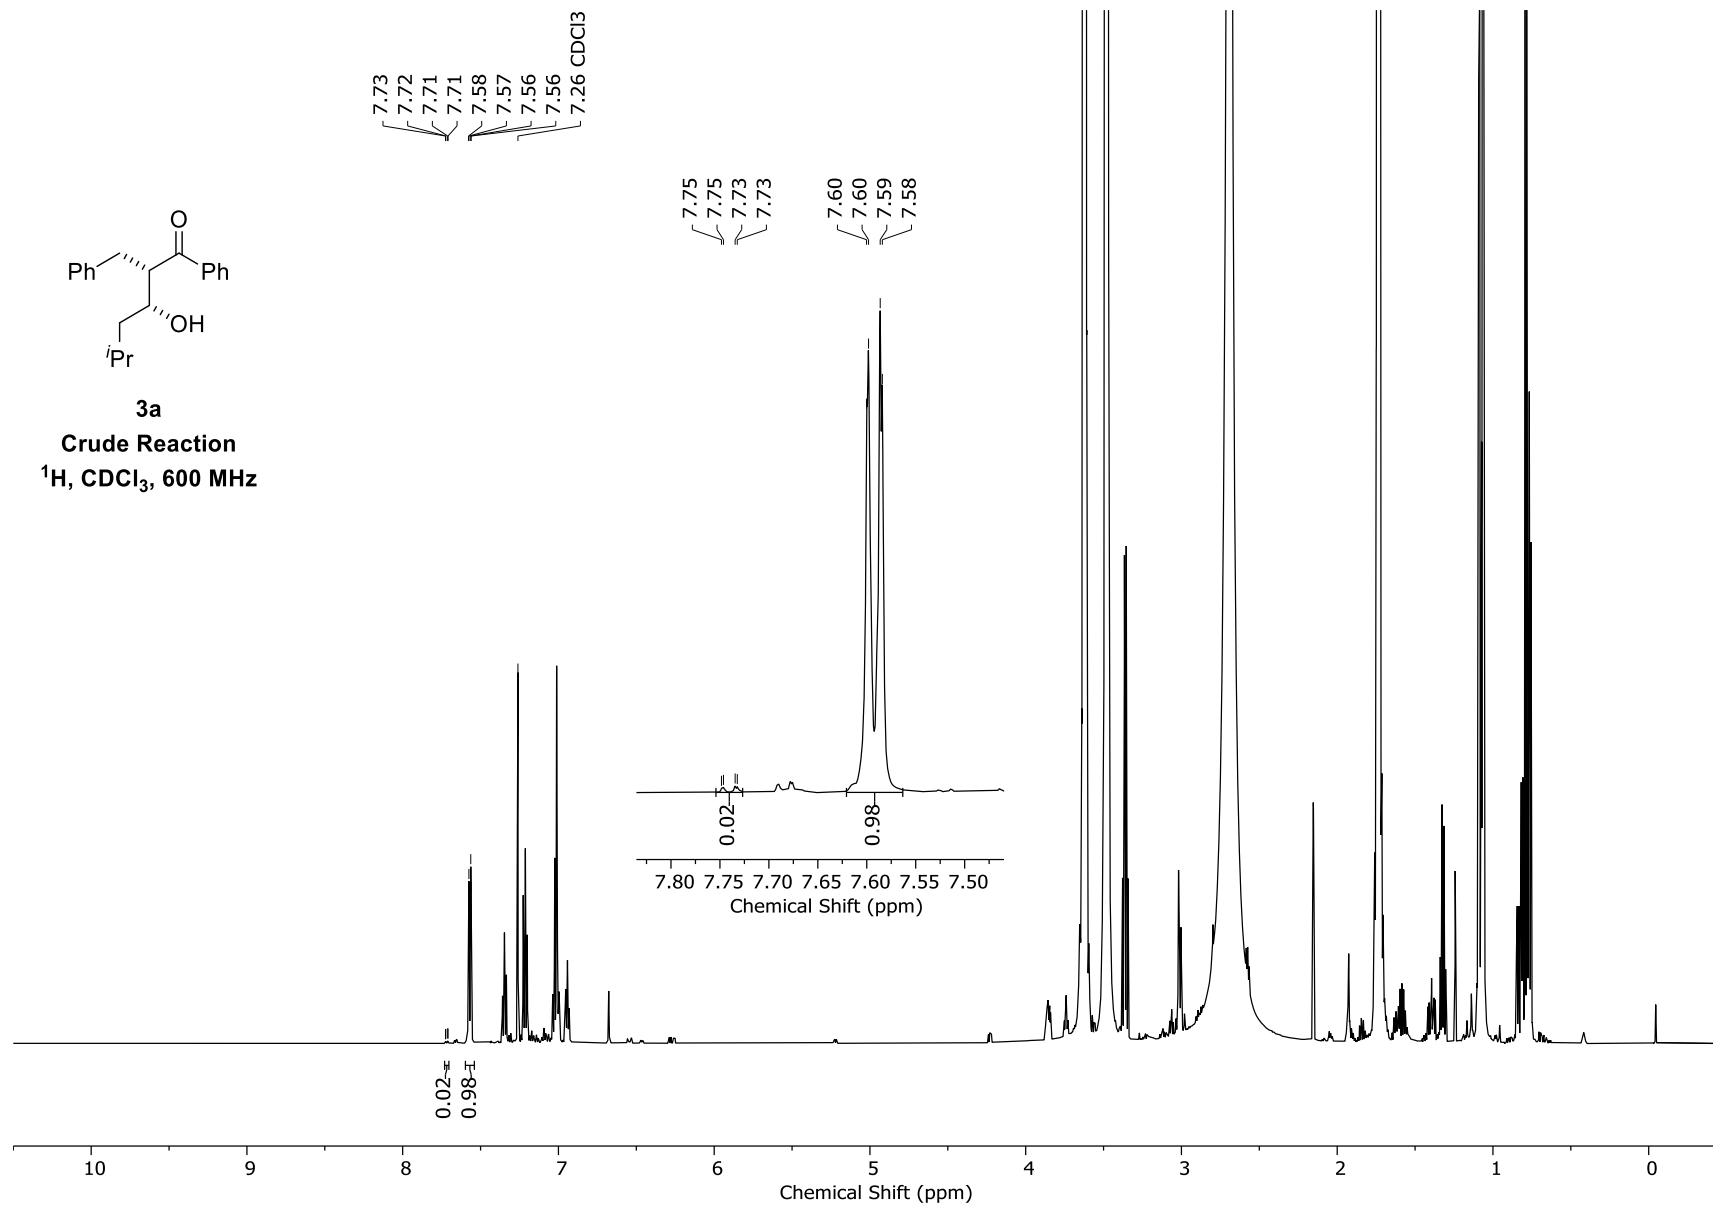

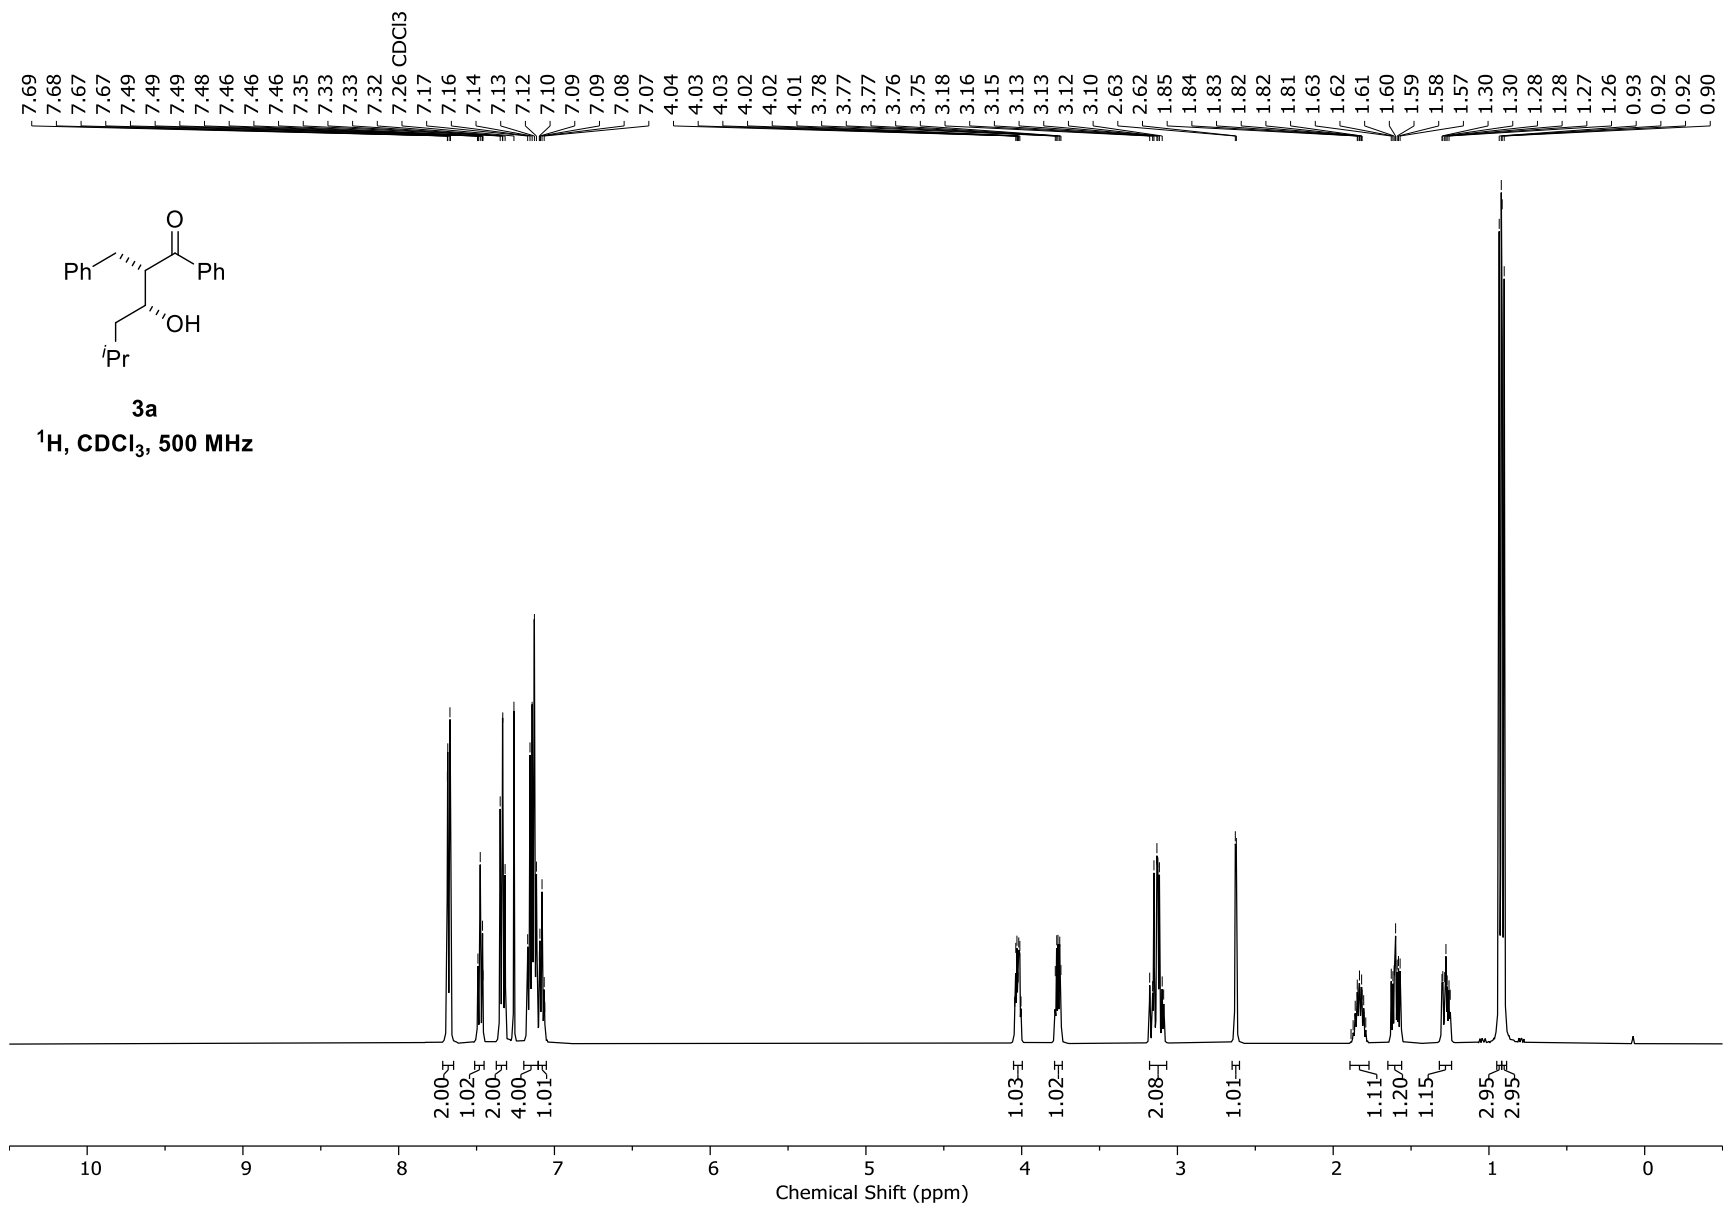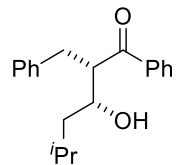

**3a**  
<sup>1</sup>H, CDCl<sub>3</sub>, 500 MHz

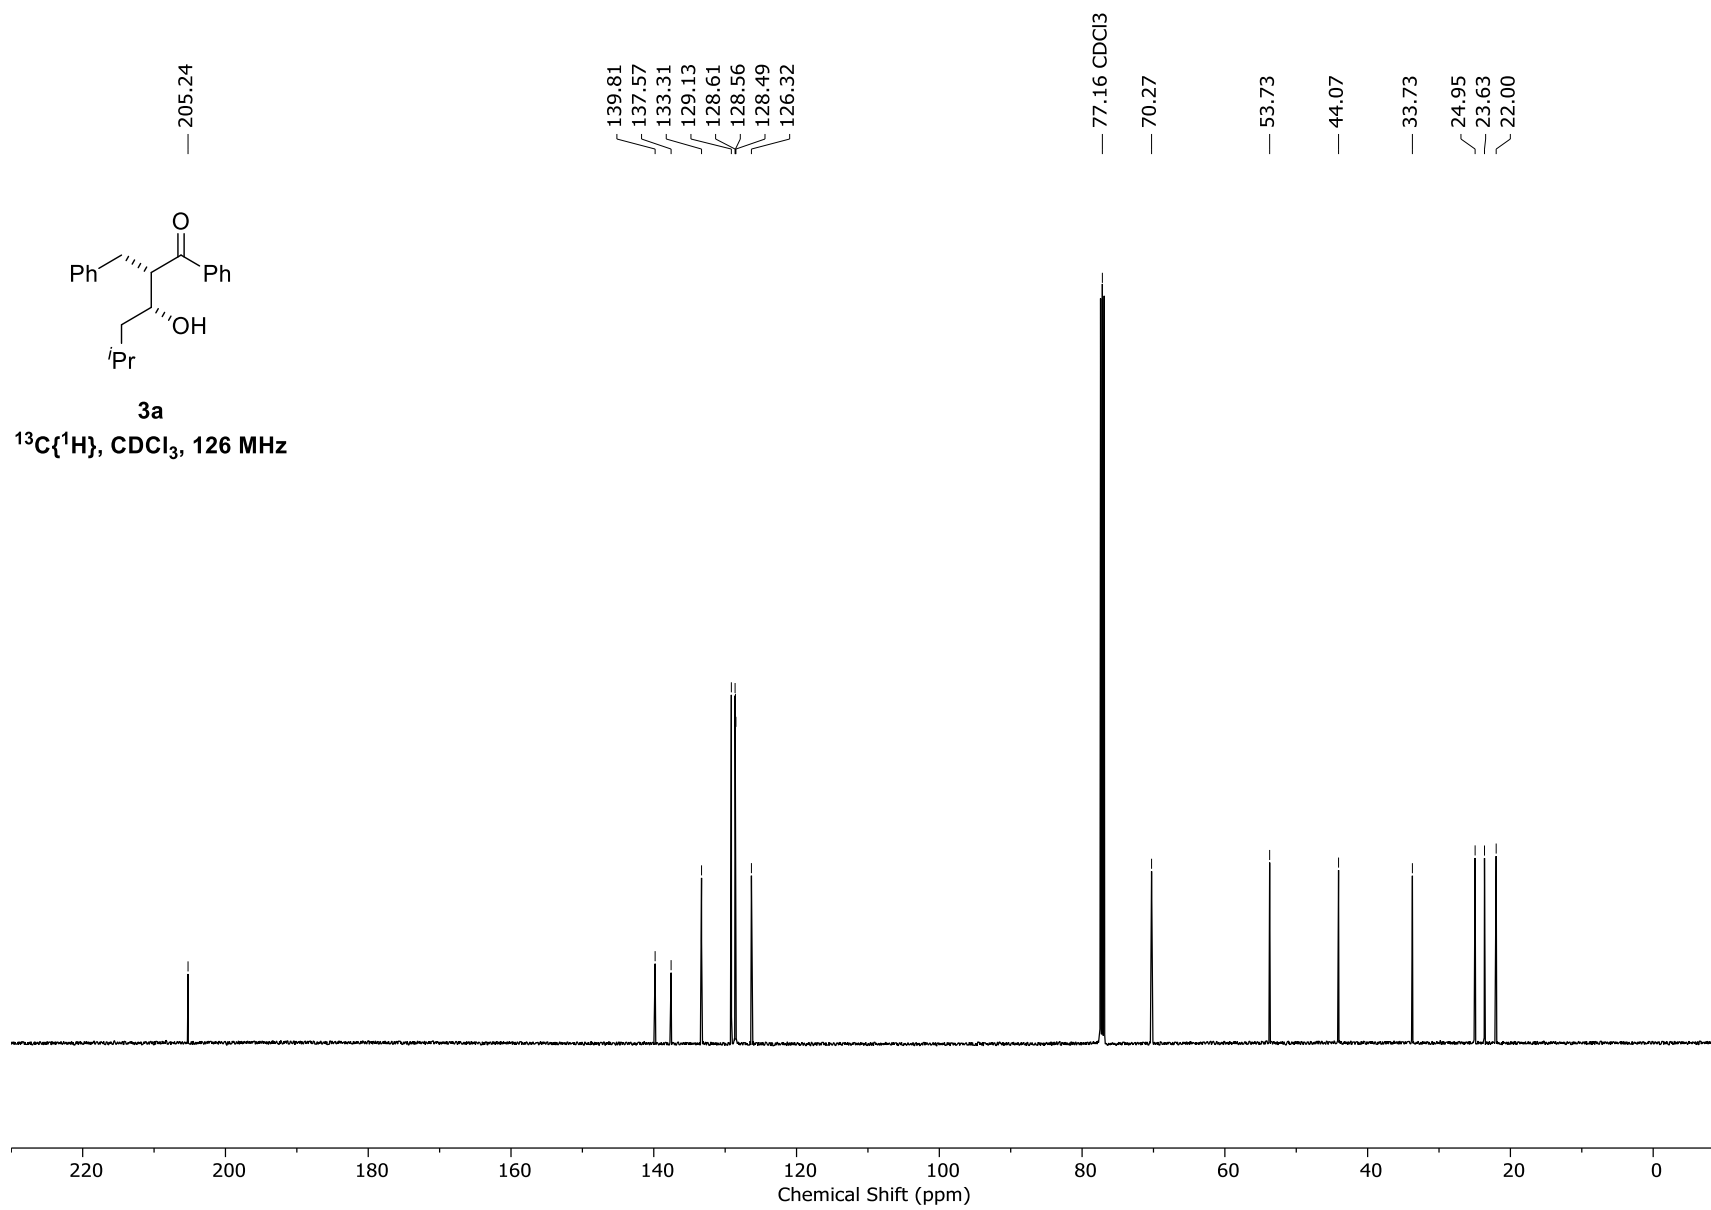

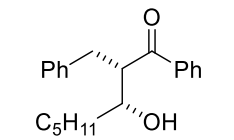

**3b**  
Crude Reaction  
 $^1\text{H}$ ,  $\text{CDCl}_3$ , 400 MHz

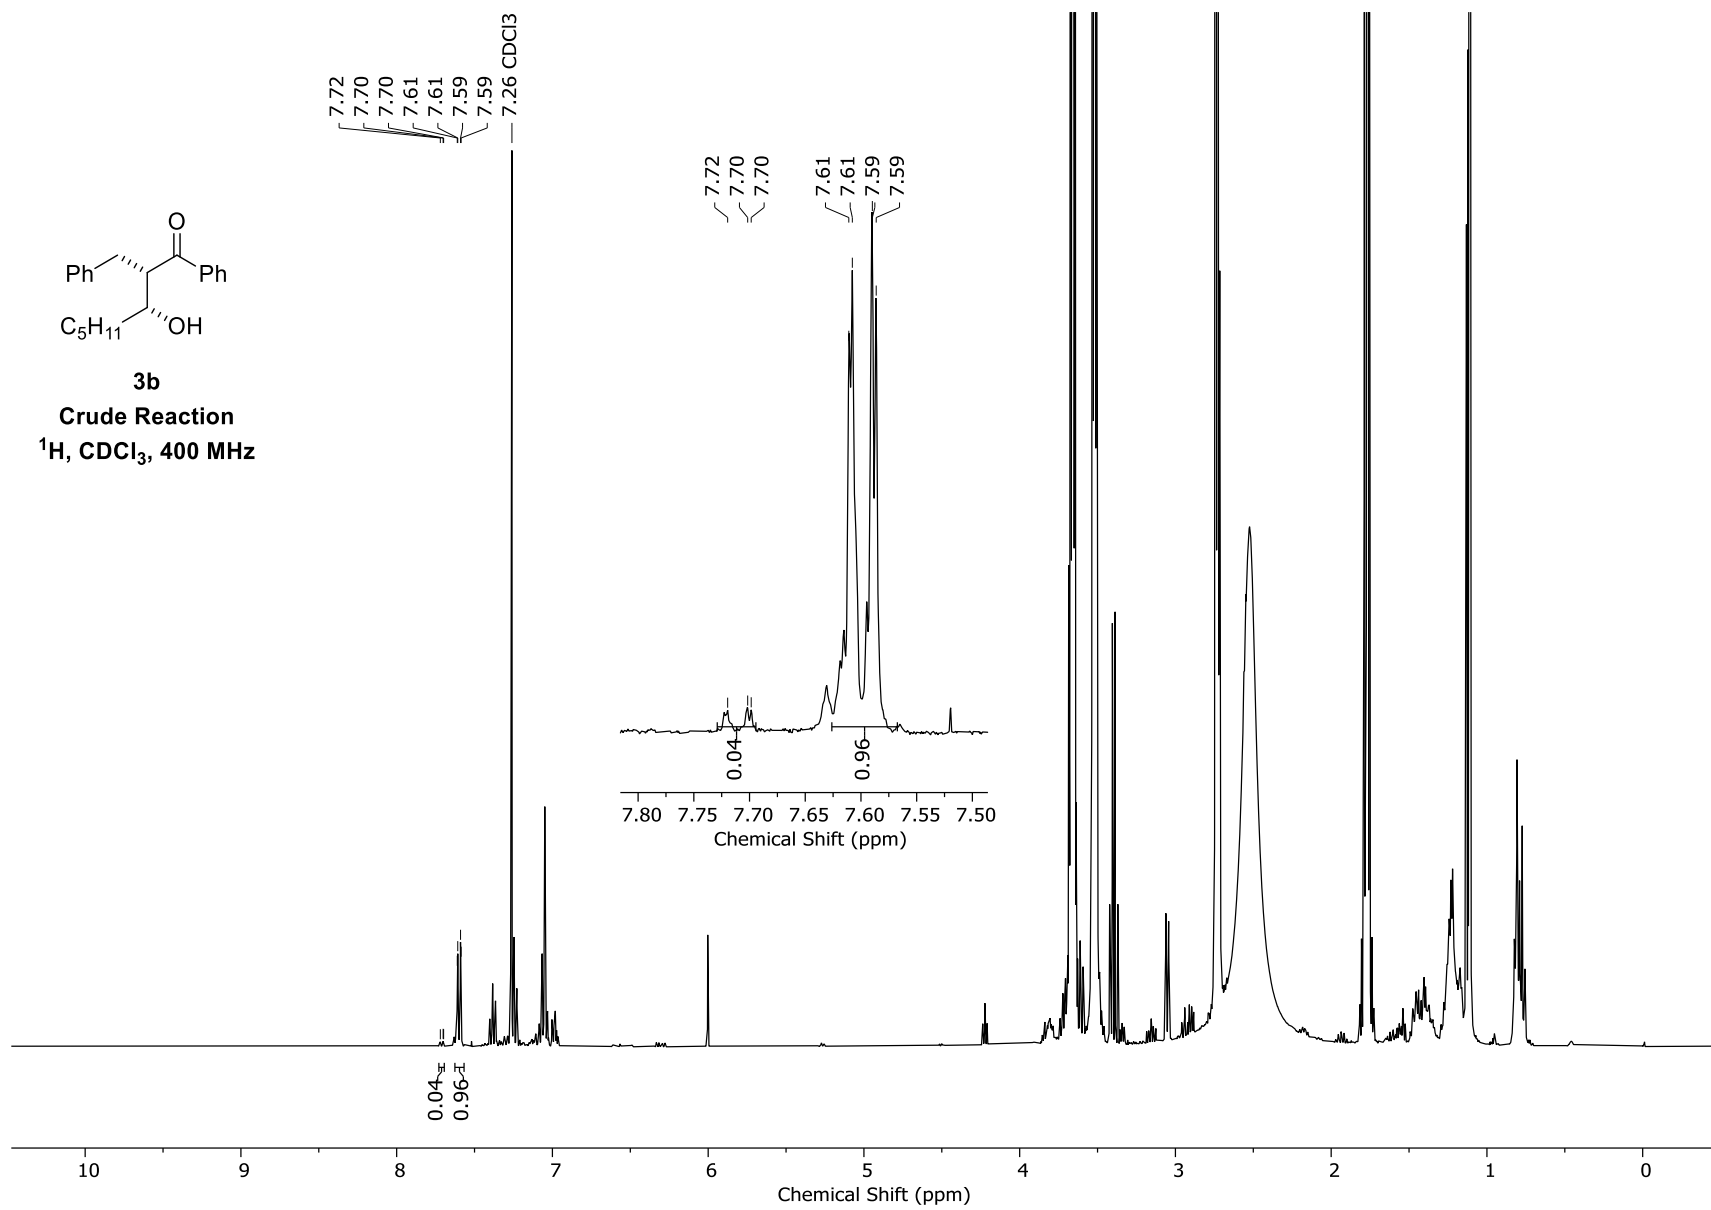

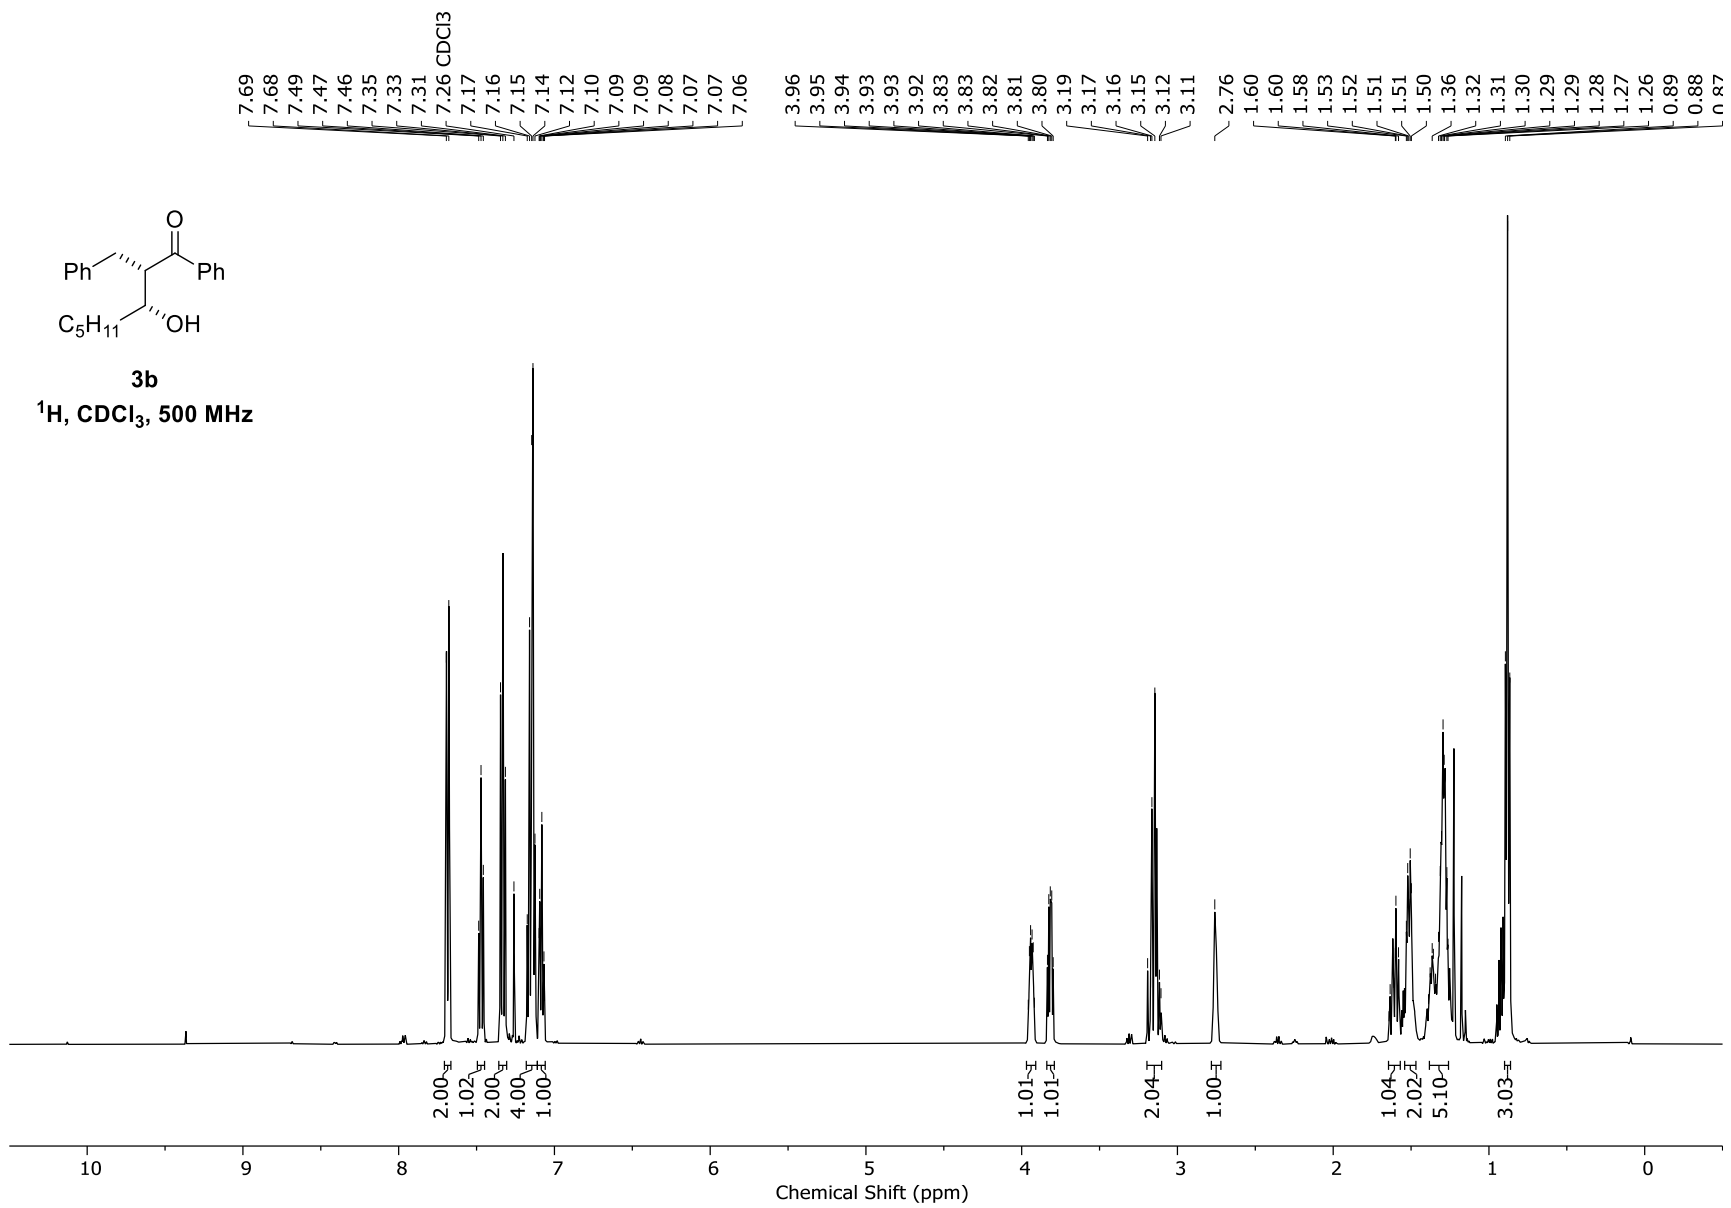

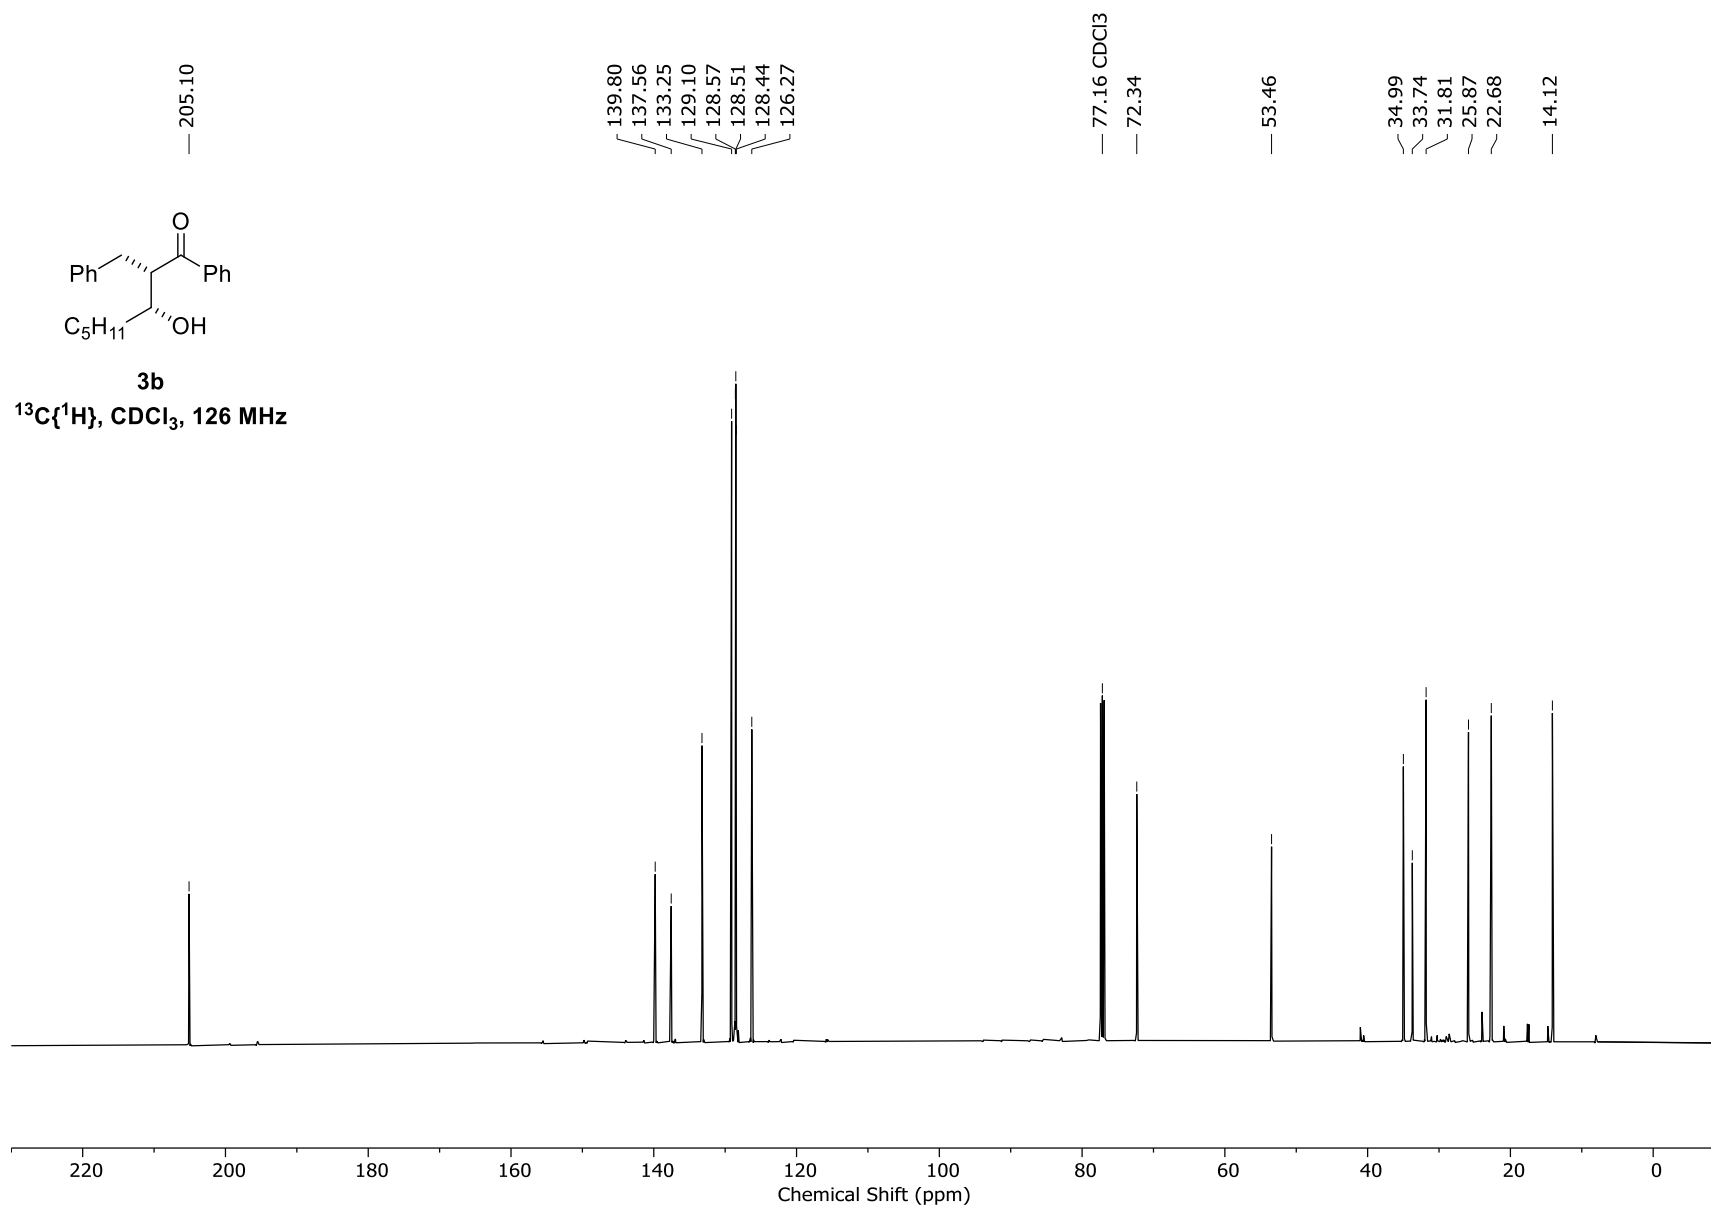

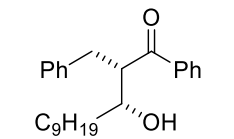

**3c**  
Crude Reaction  
 $^1\text{H}$ ,  $\text{CDCl}_3$ , 600 MHz

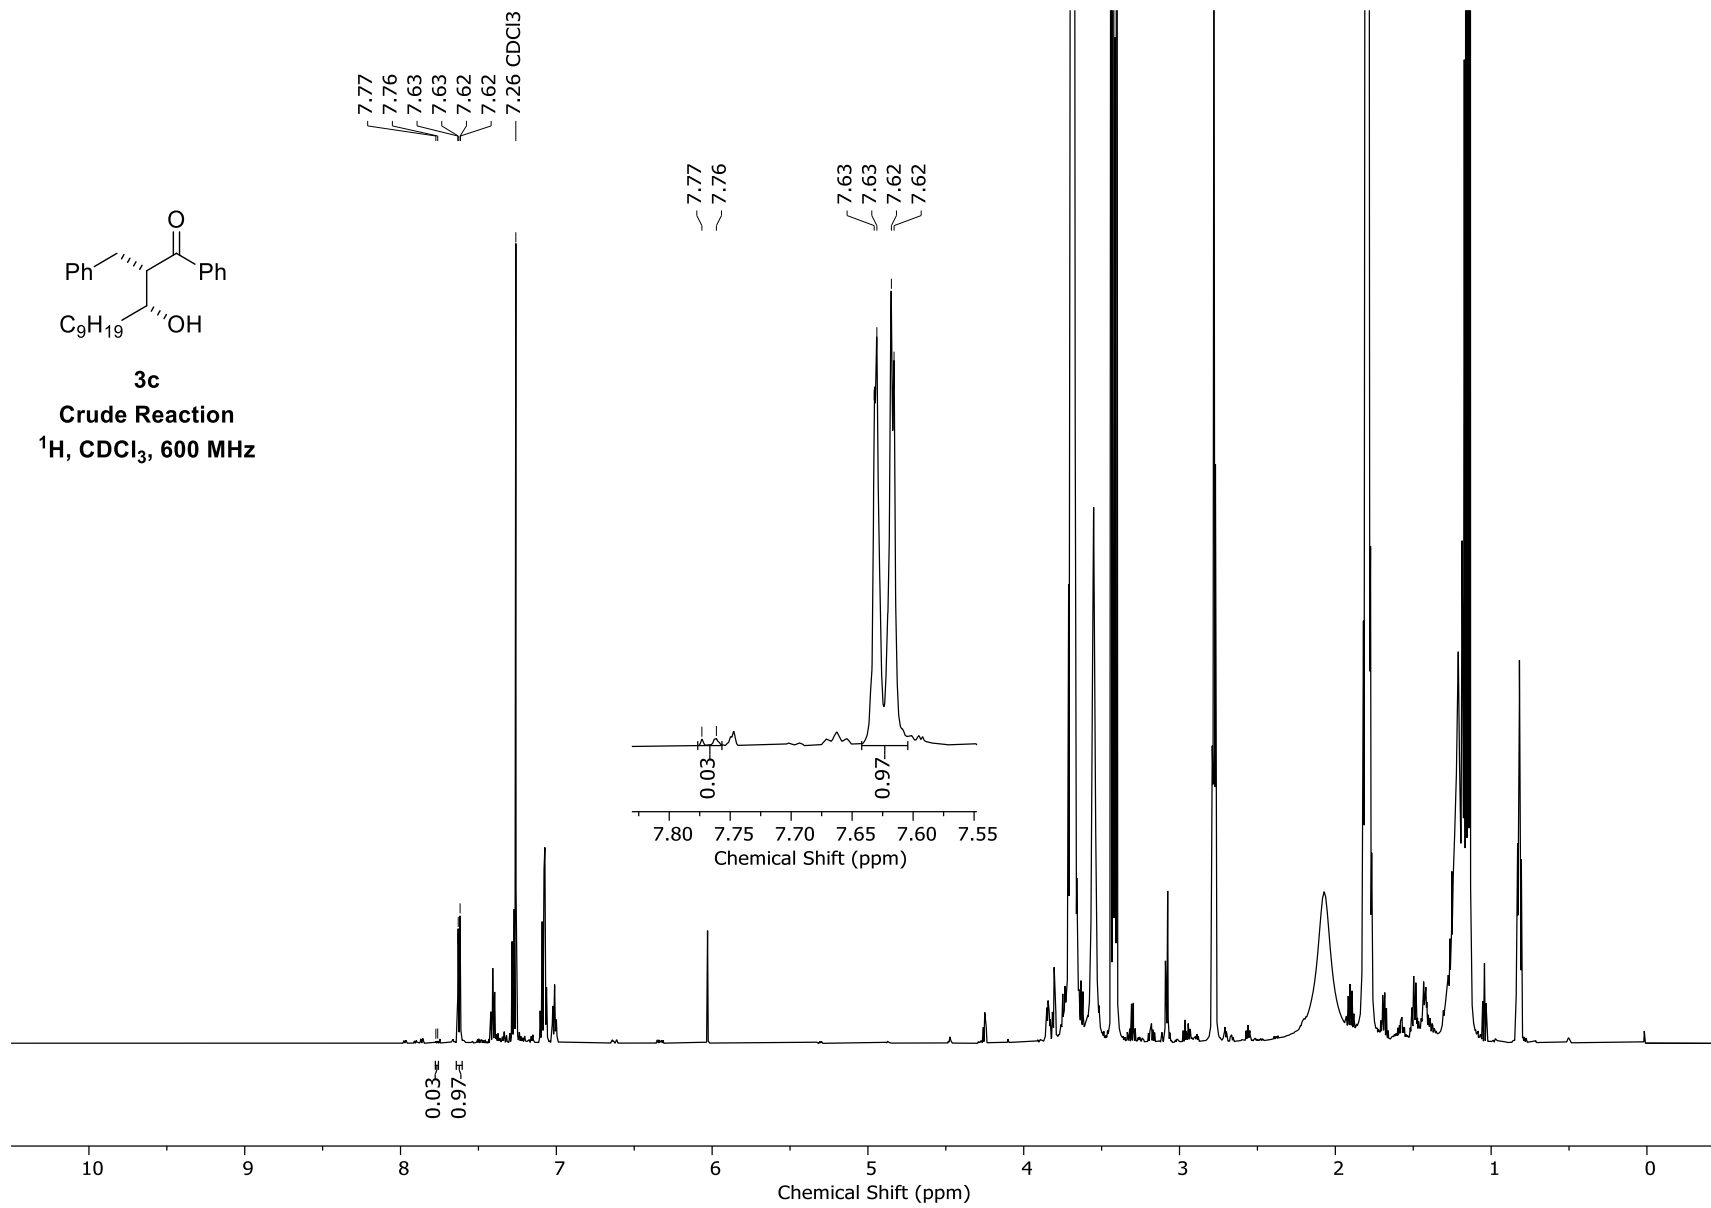

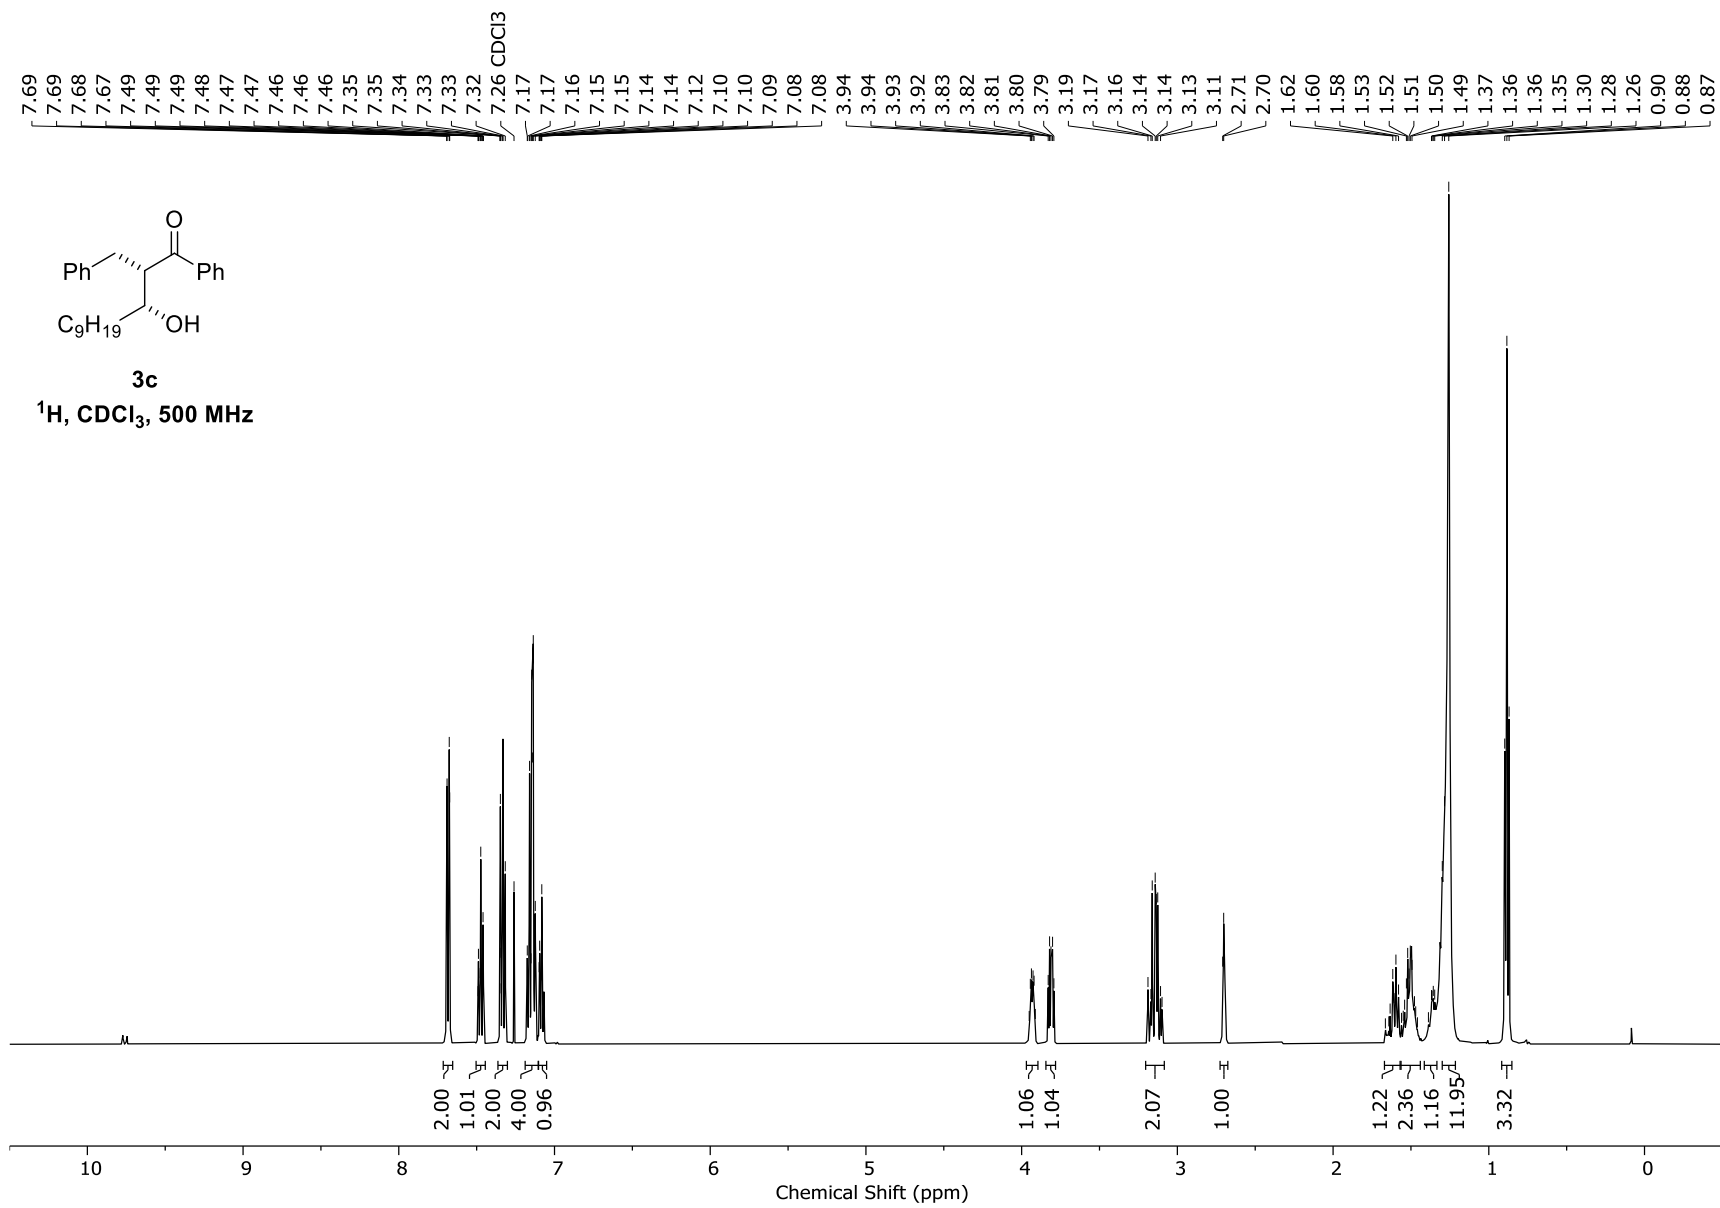

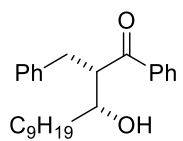

**3c**

$^{13}\text{C}\{^1\text{H}\}$ ,  $\text{CDCl}_3$ , 126 MHz

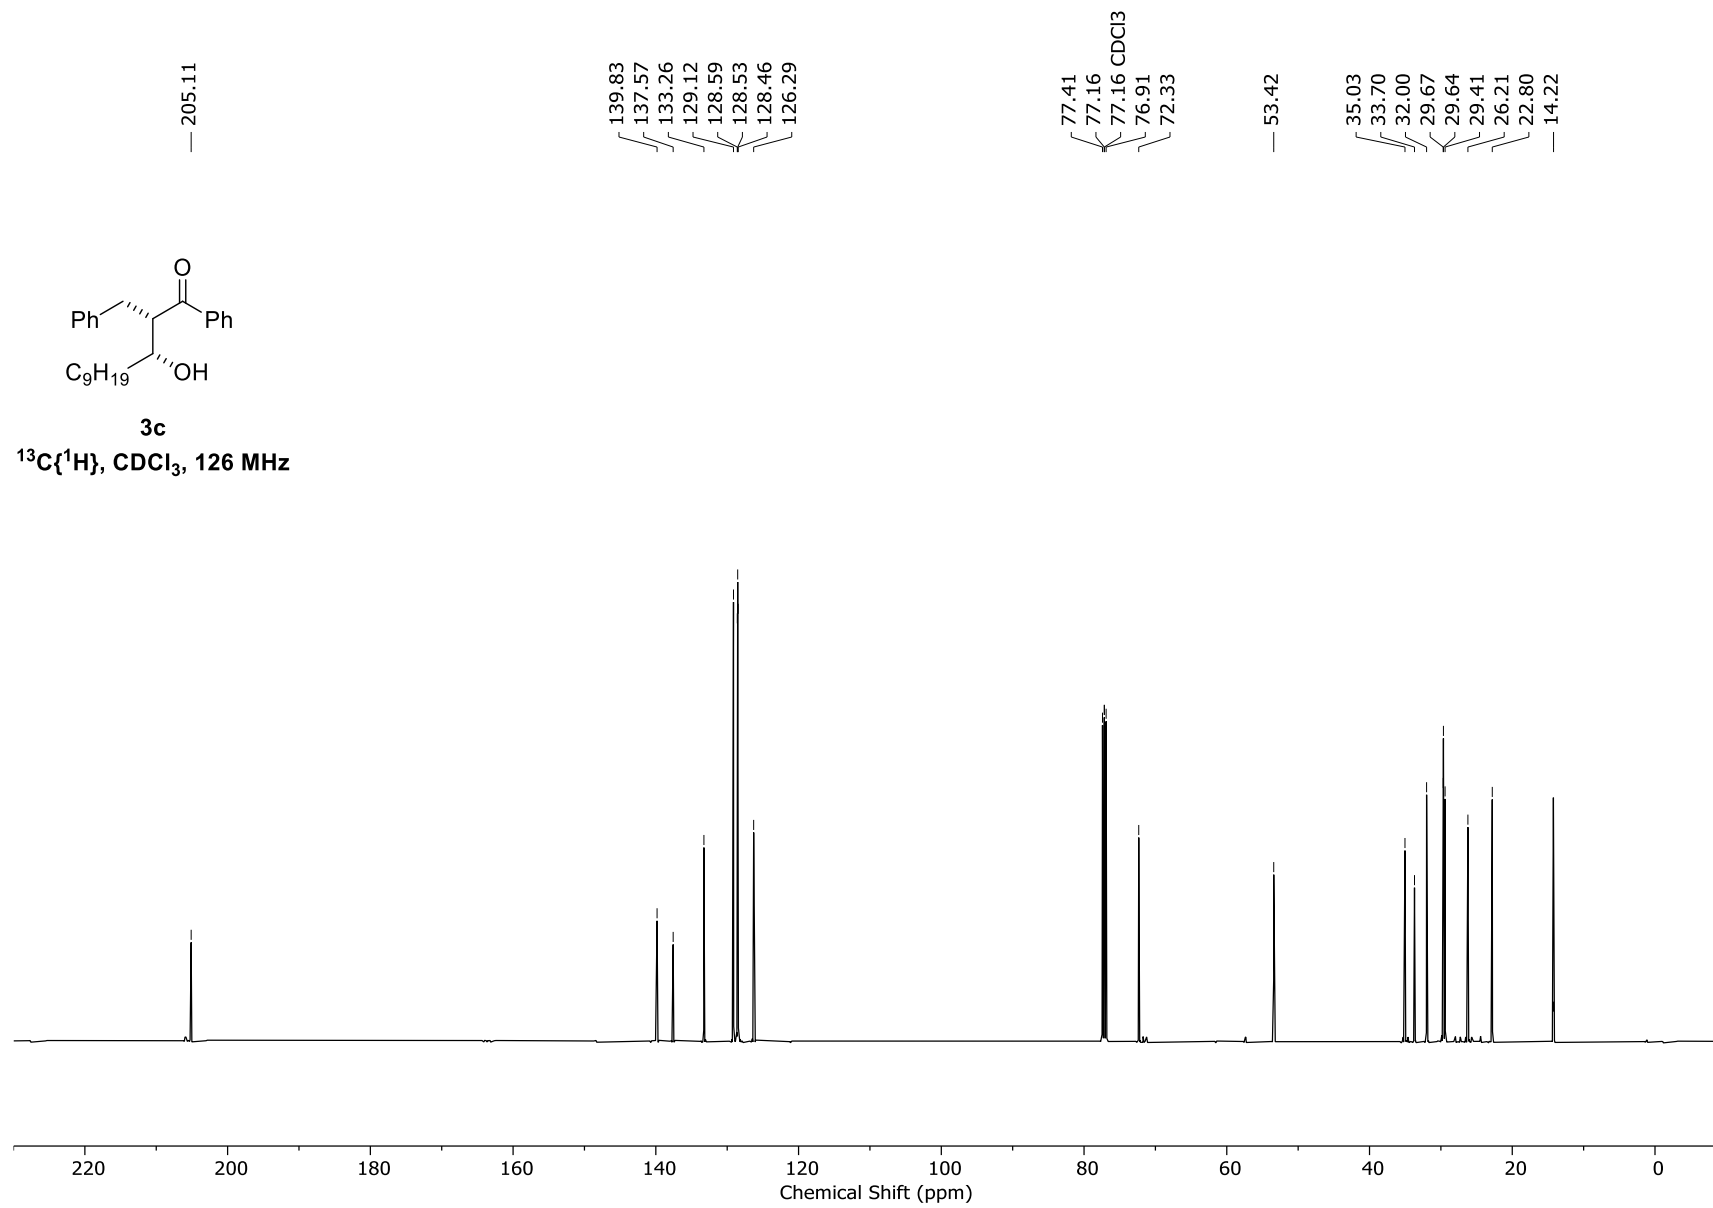

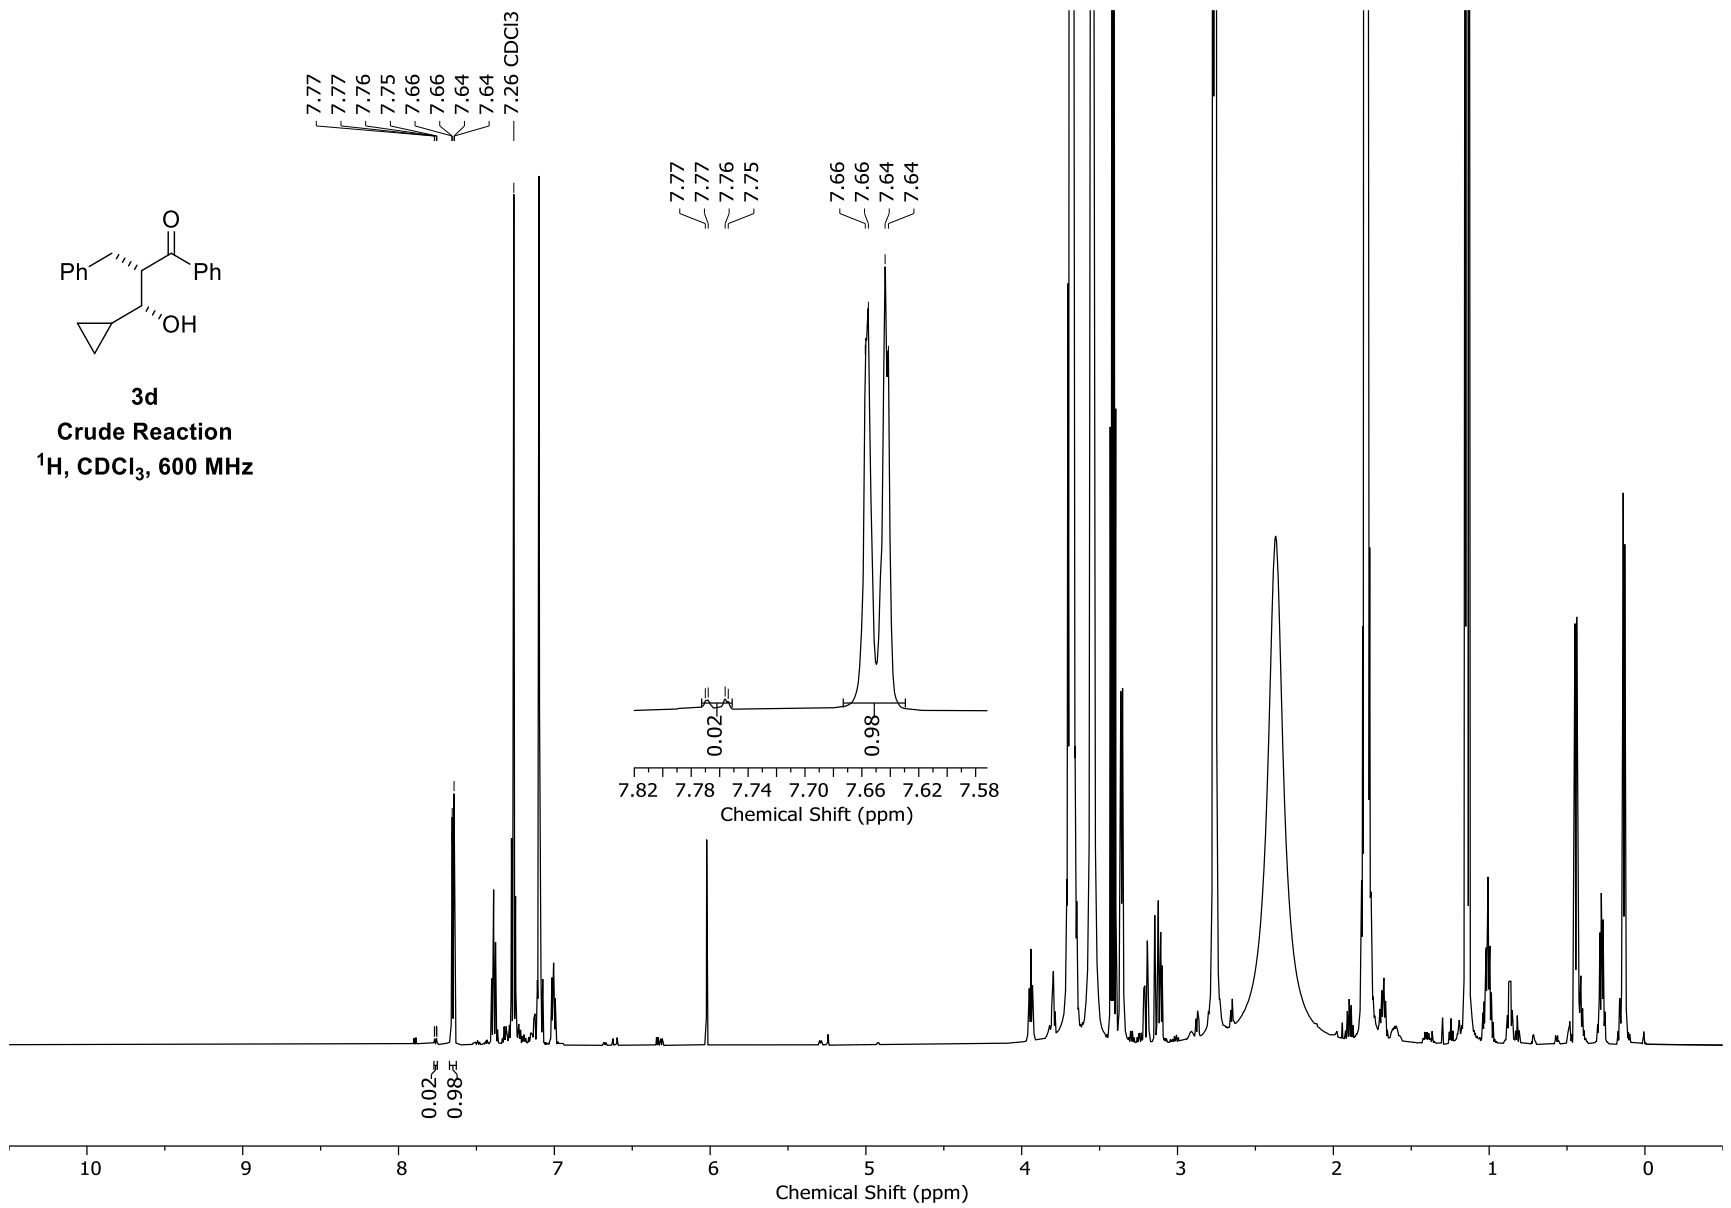

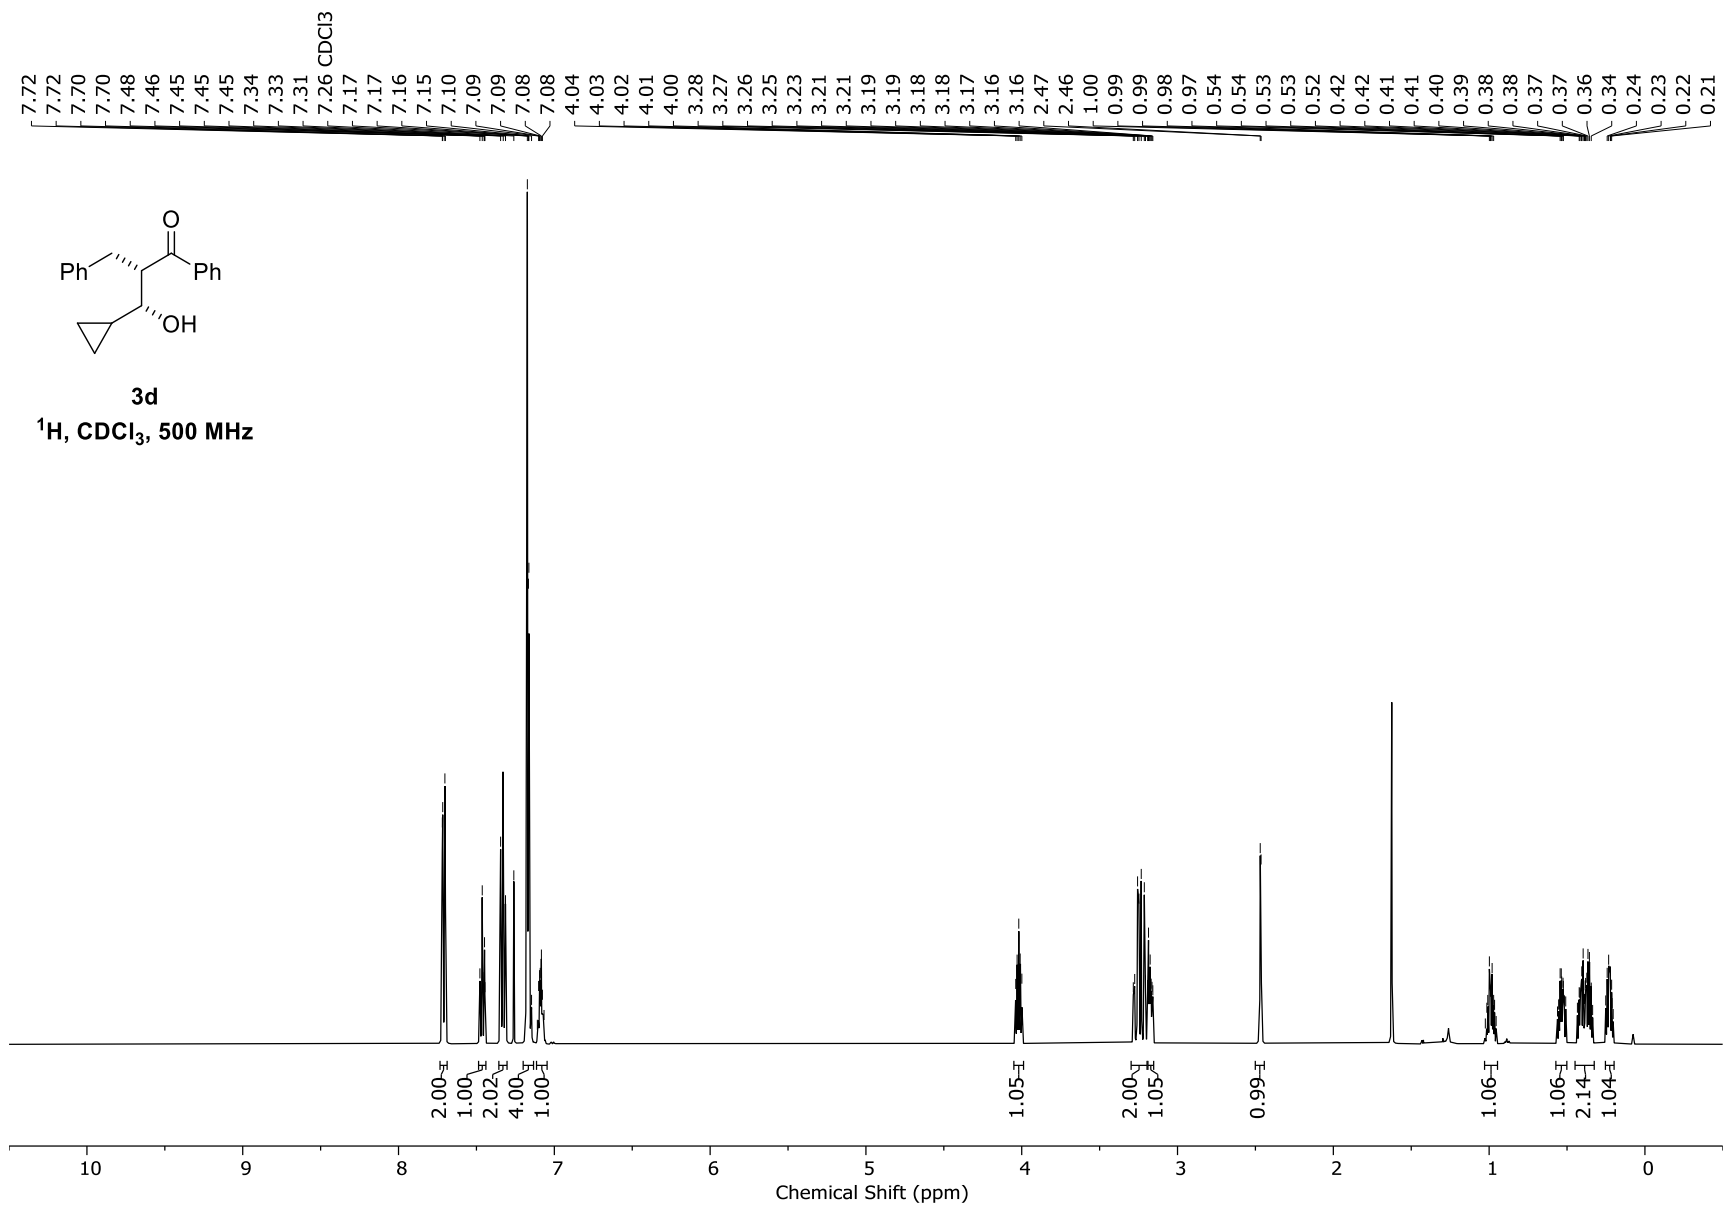

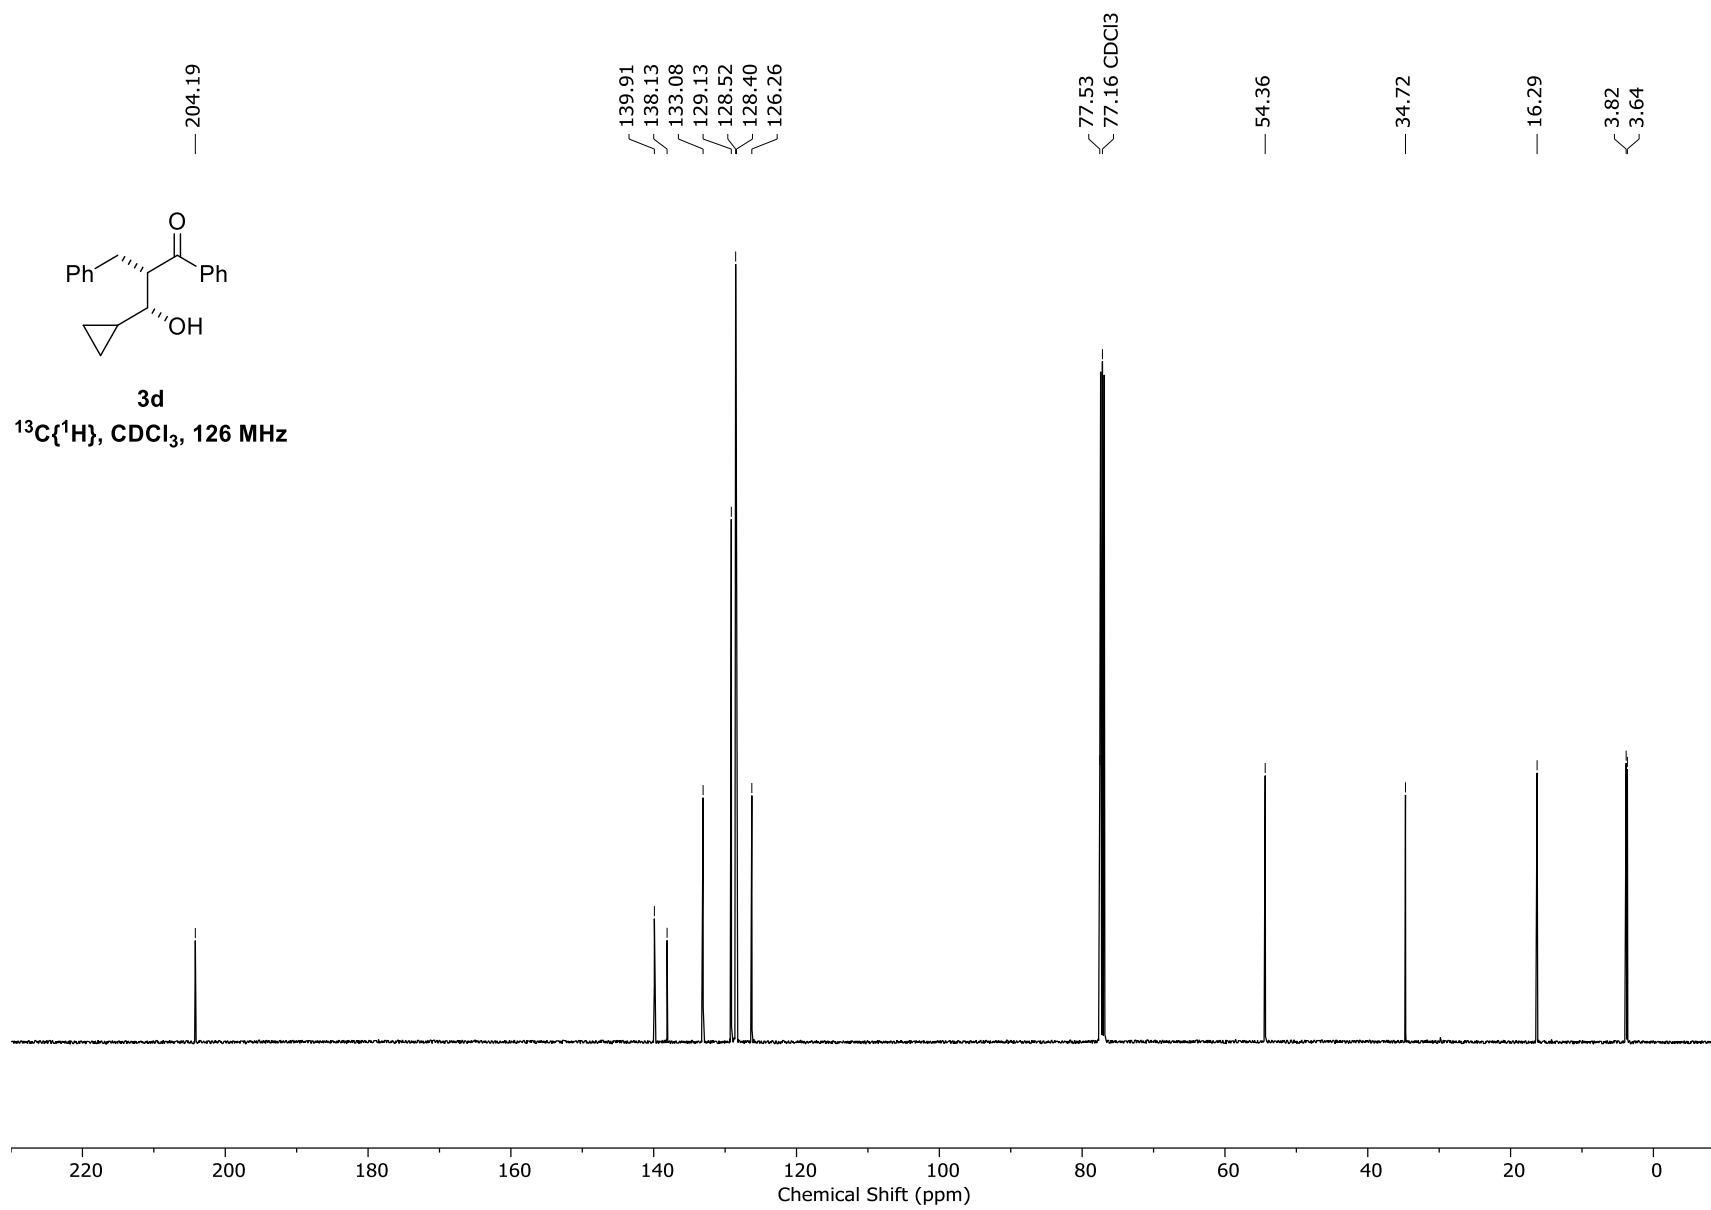

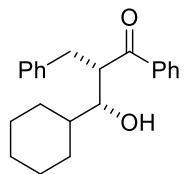

**3e**  
Crude Reaction  
<sup>1</sup>H, CDCl<sub>3</sub>, 400 MHz

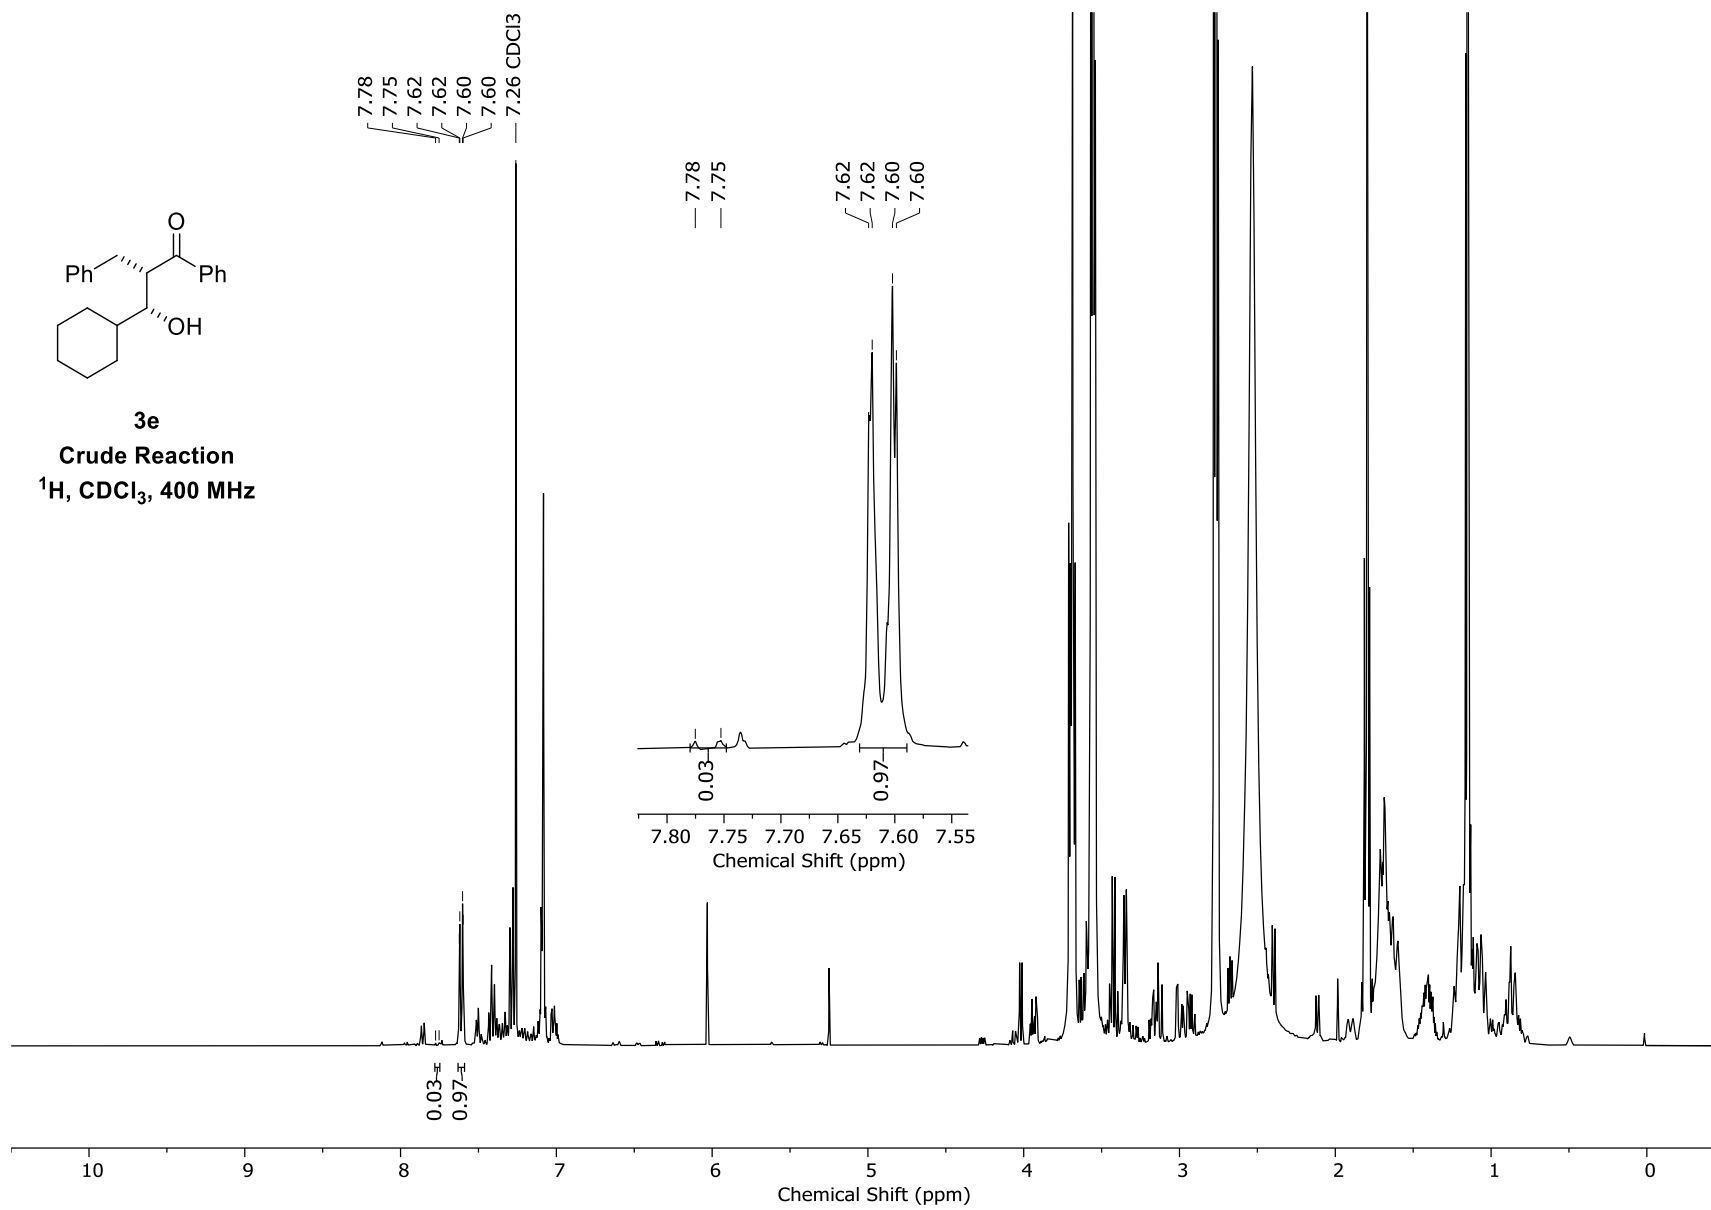

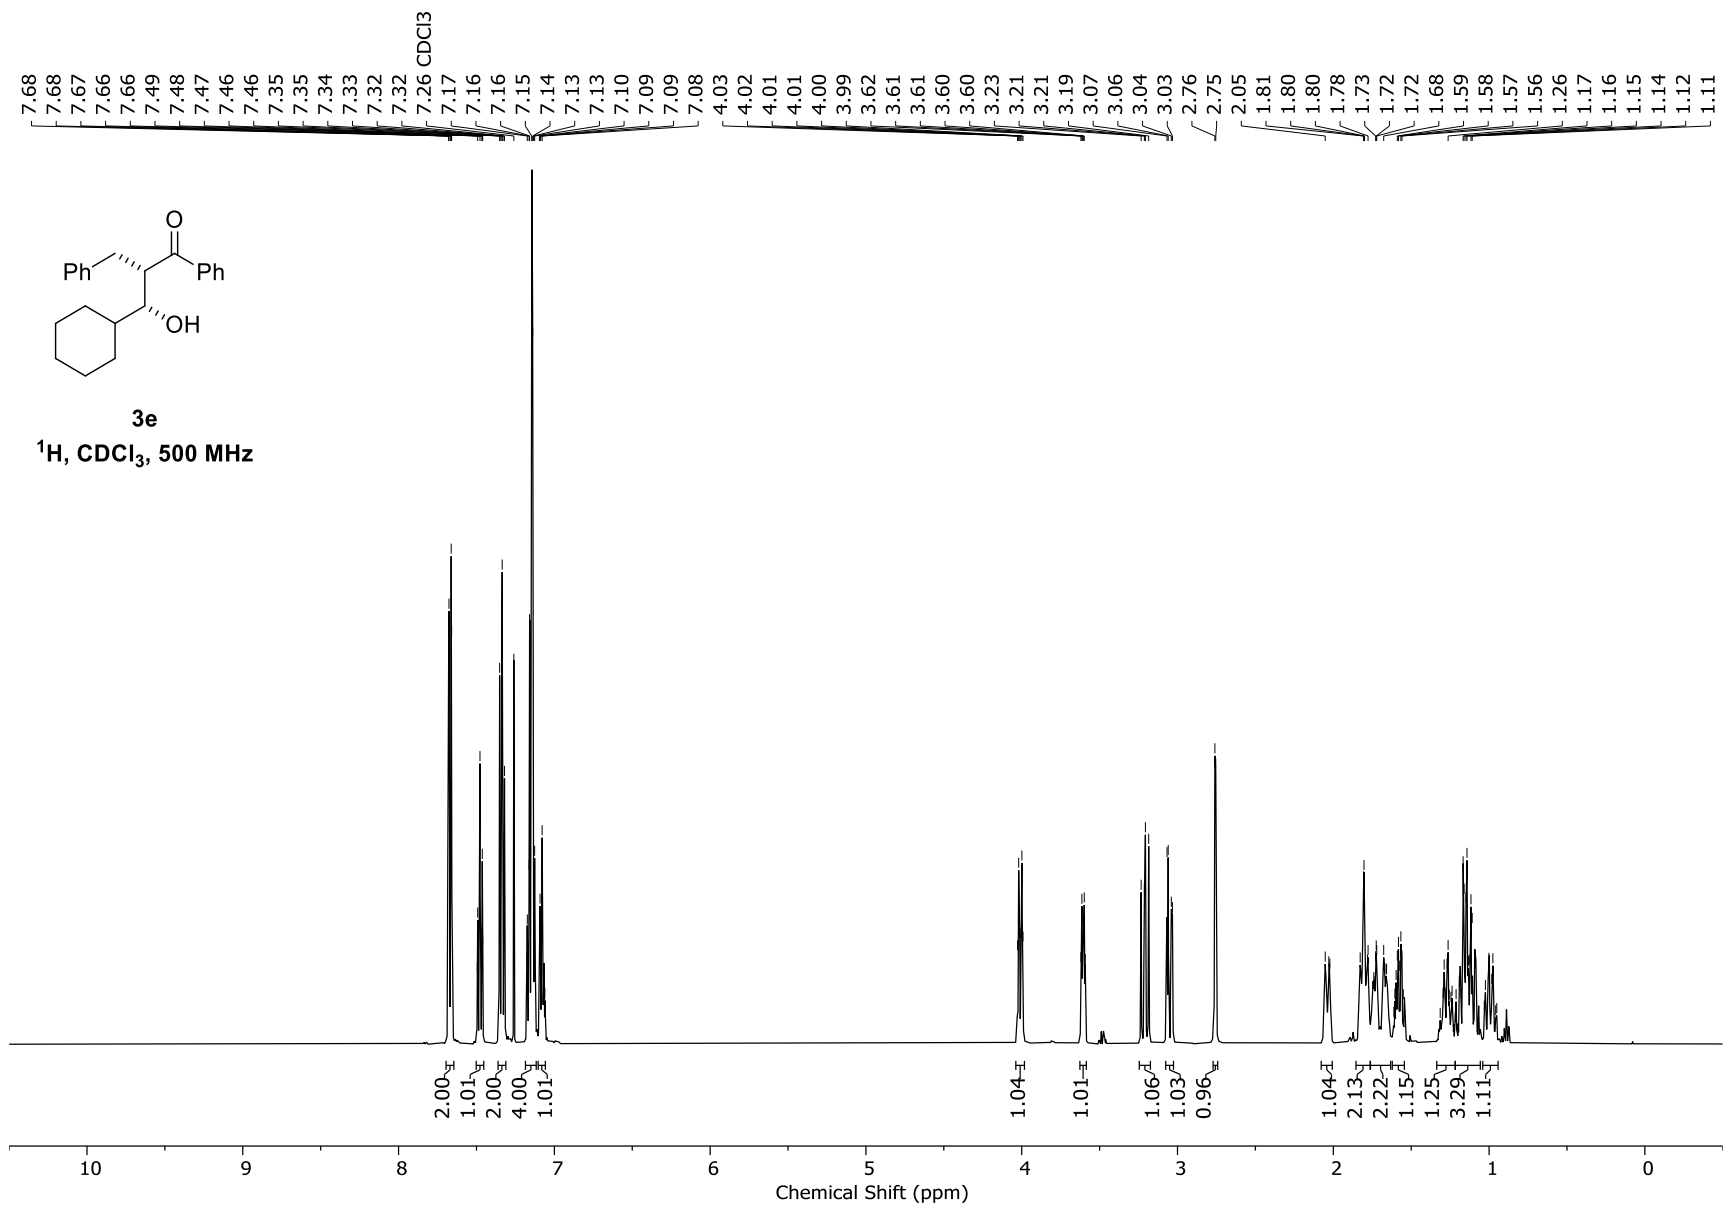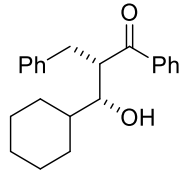

**3e**  
<sup>1</sup>H, CDCl<sub>3</sub>, 500 MHz

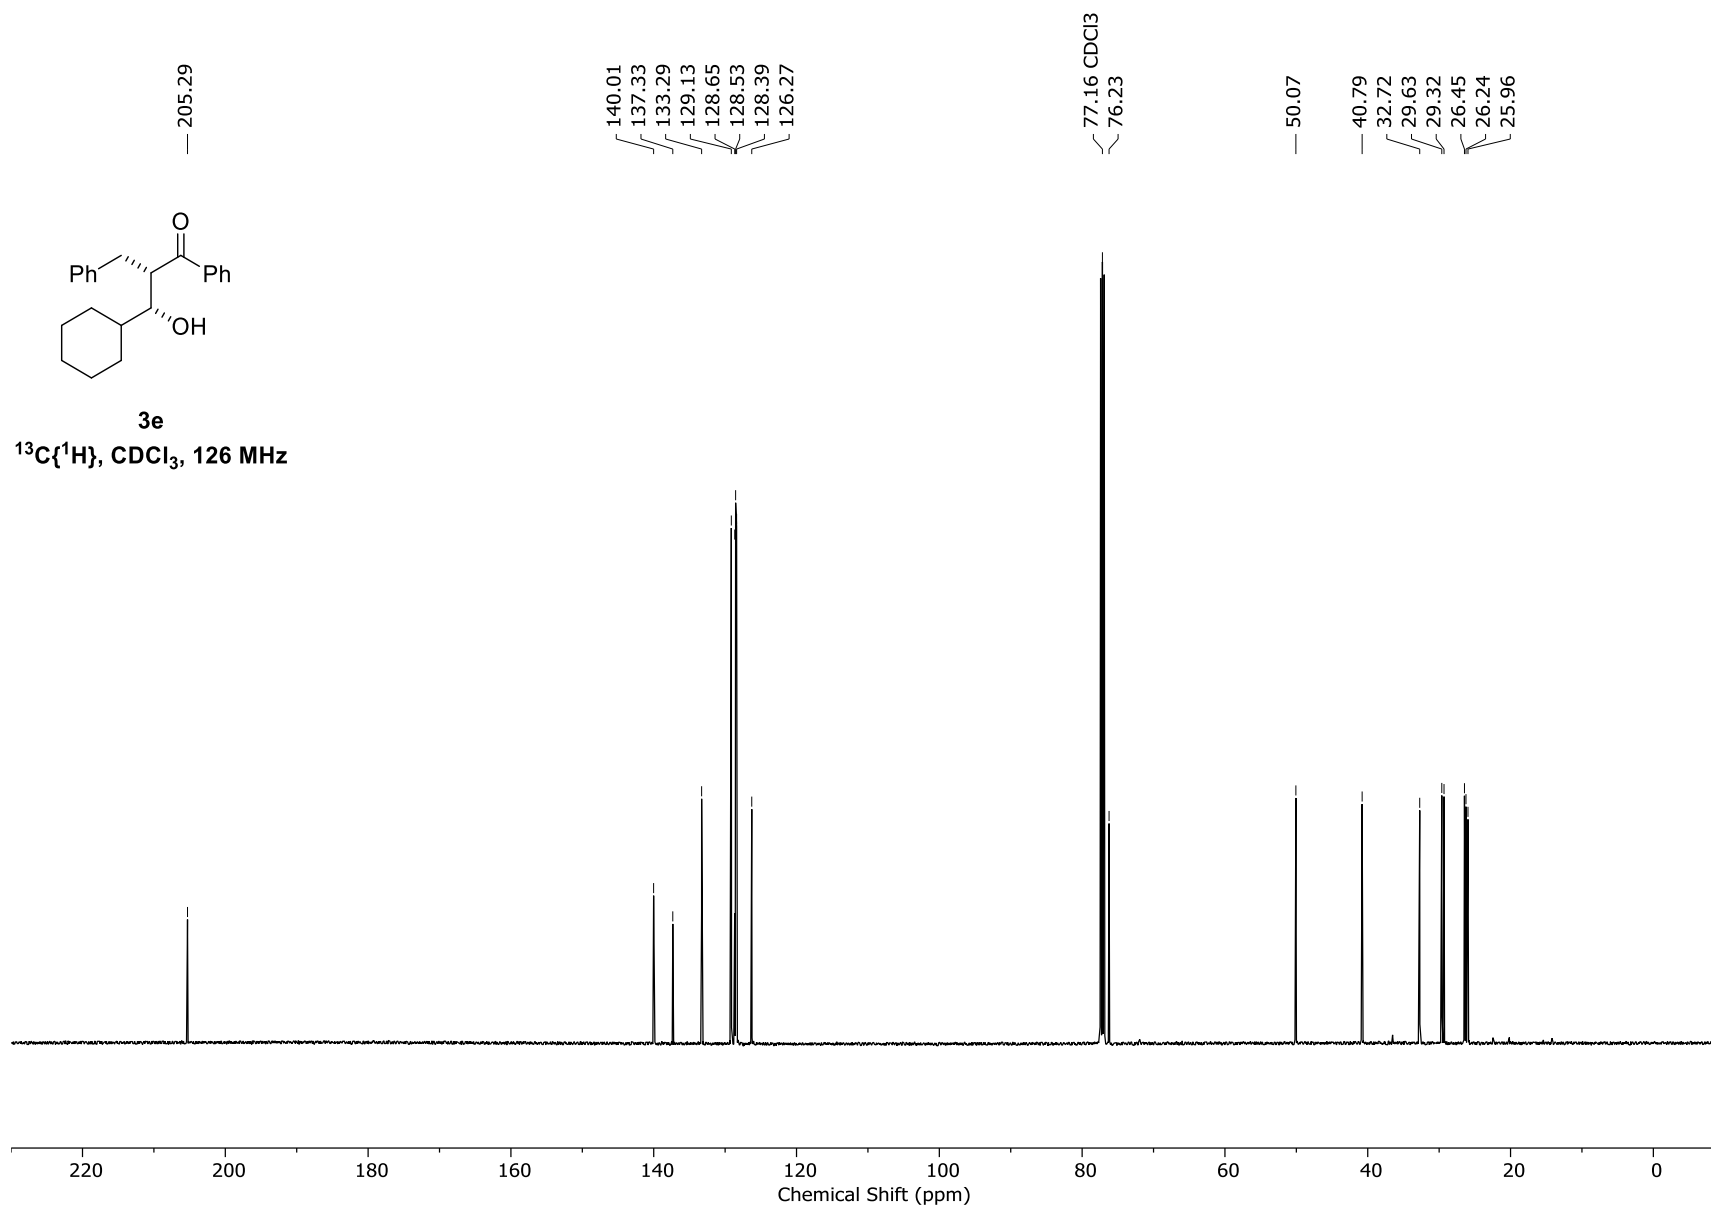

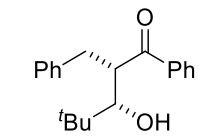

**3f**  
**Crude Reaction**  
 $^1\text{H}$ ,  $\text{CDCl}_3$ , 400 MHz

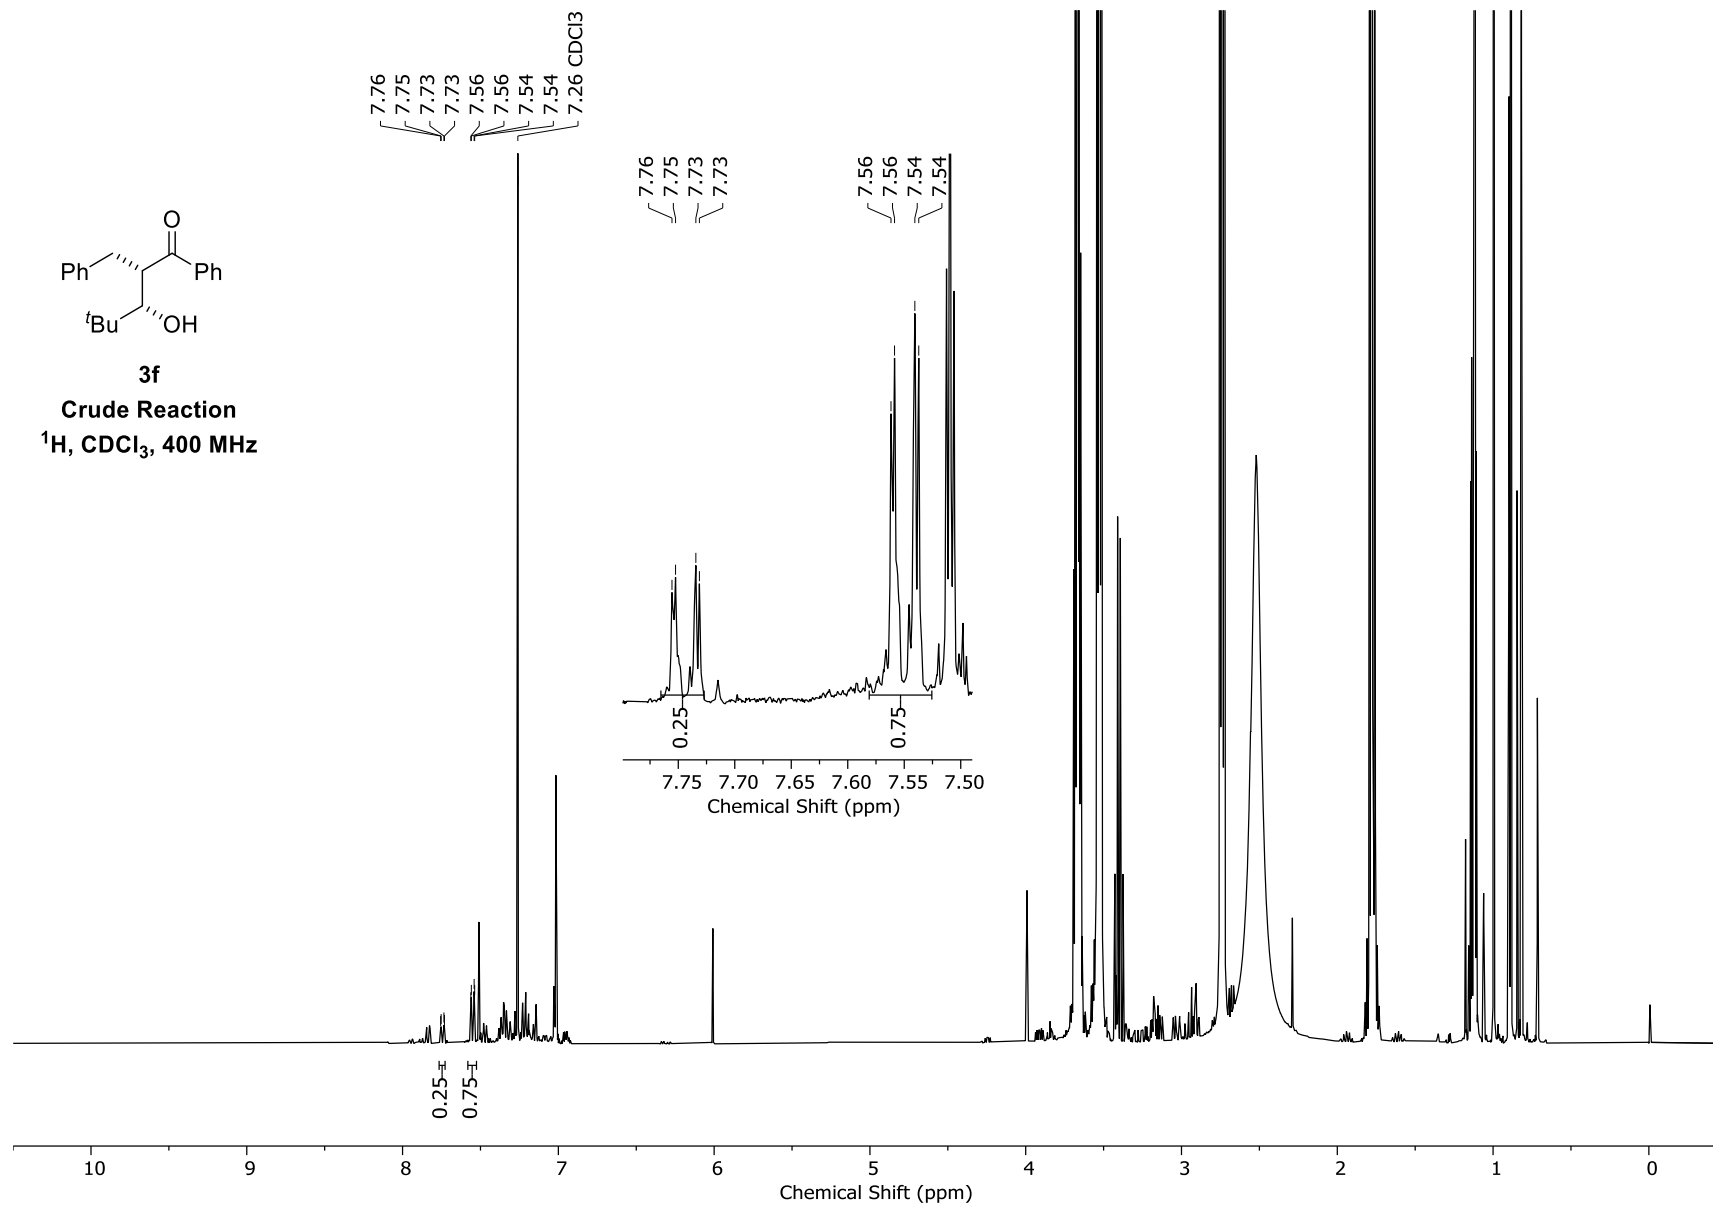

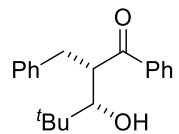

**3f**

<sup>1</sup>H, CDCl<sub>3</sub>, 500 MHz

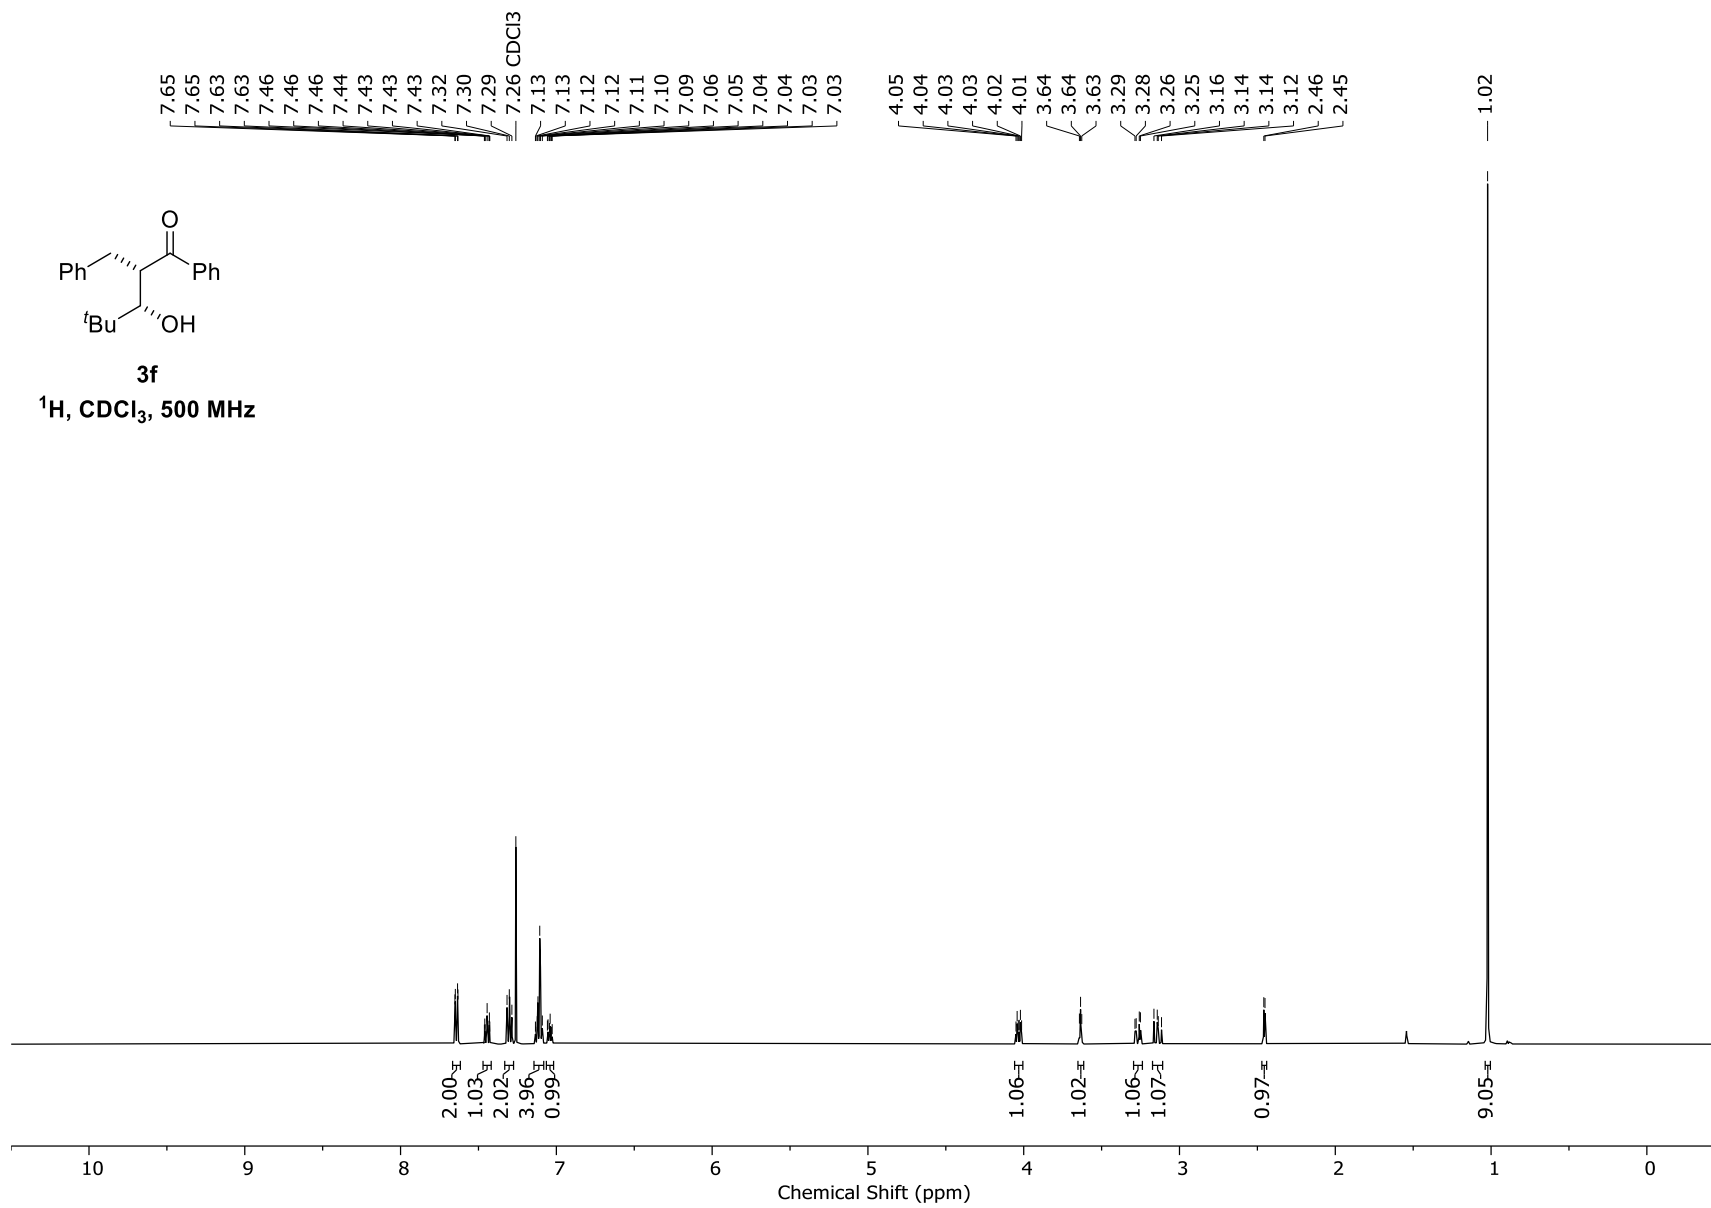

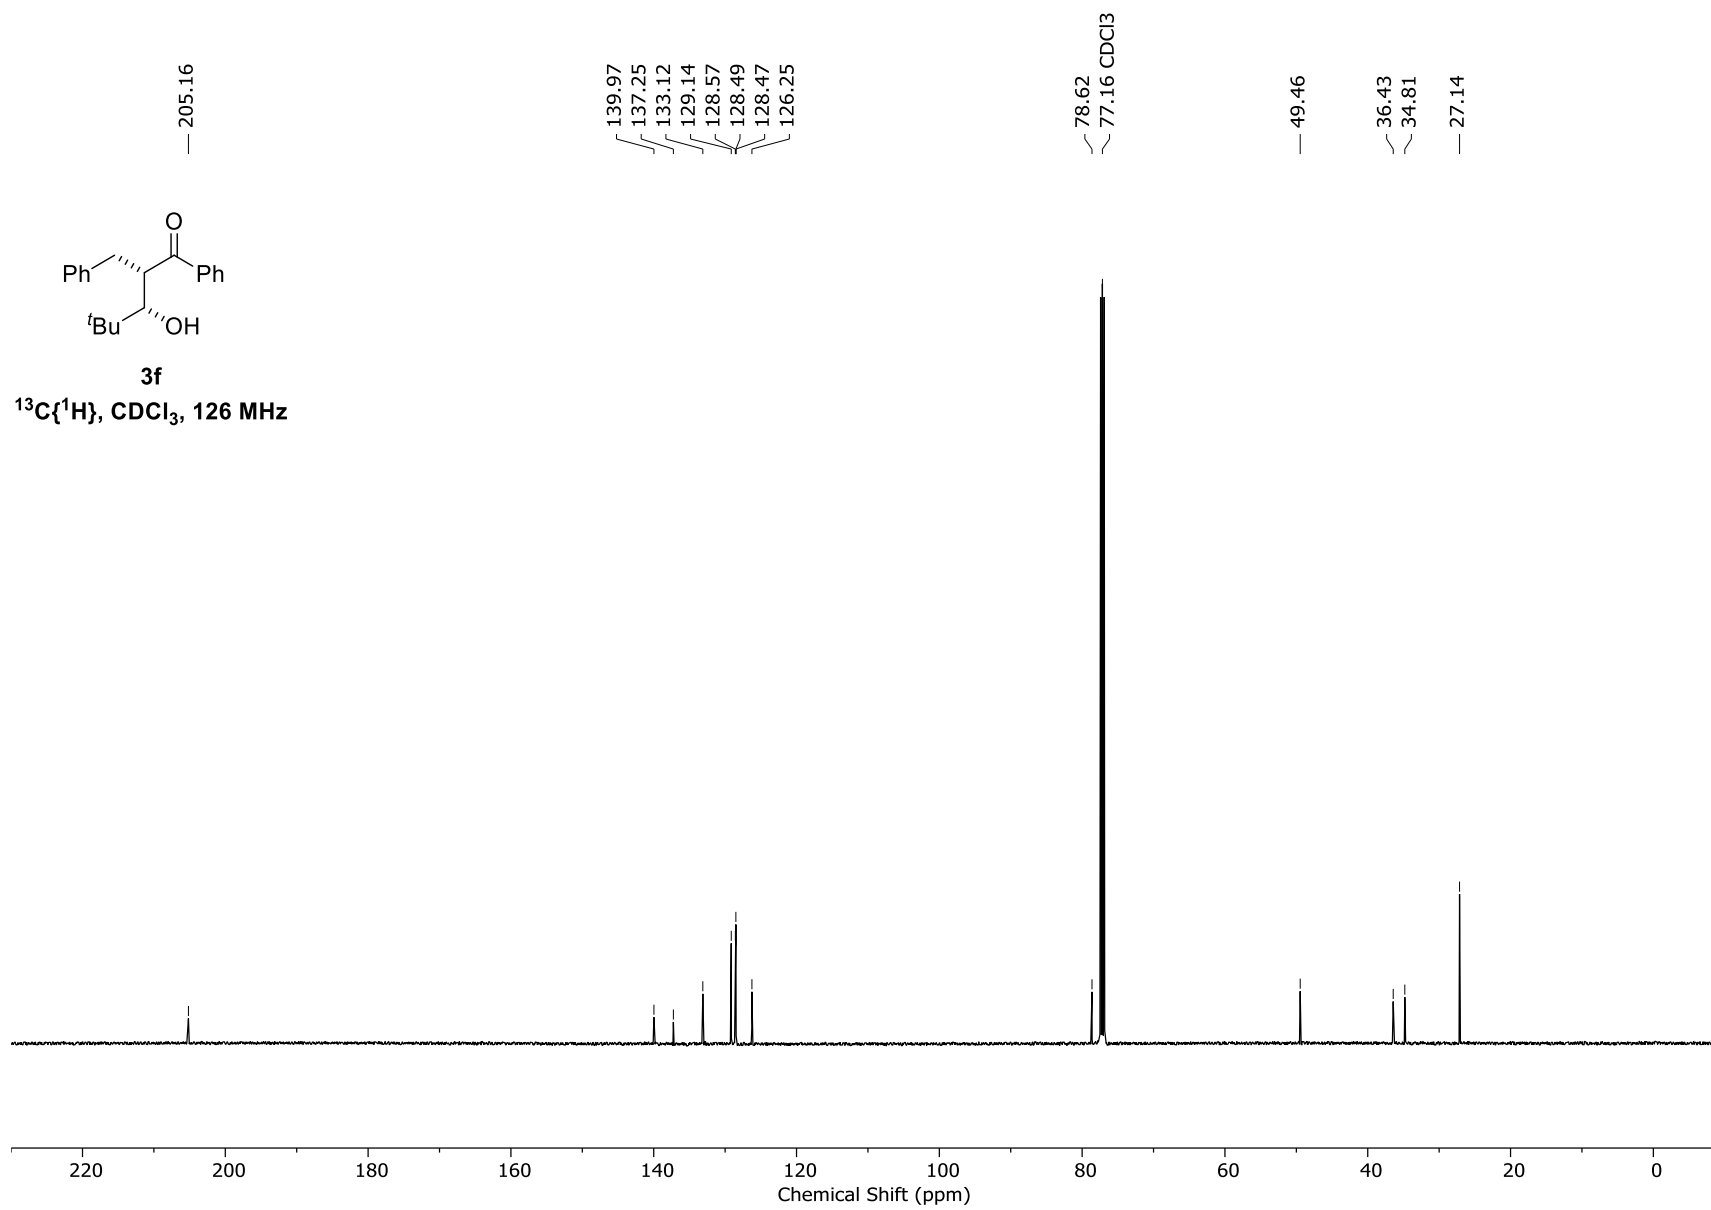

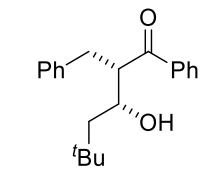

**3g**  
Crude Reaction  
 $^1\text{H}$ ,  $\text{CDCl}_3$ , 400 MHz

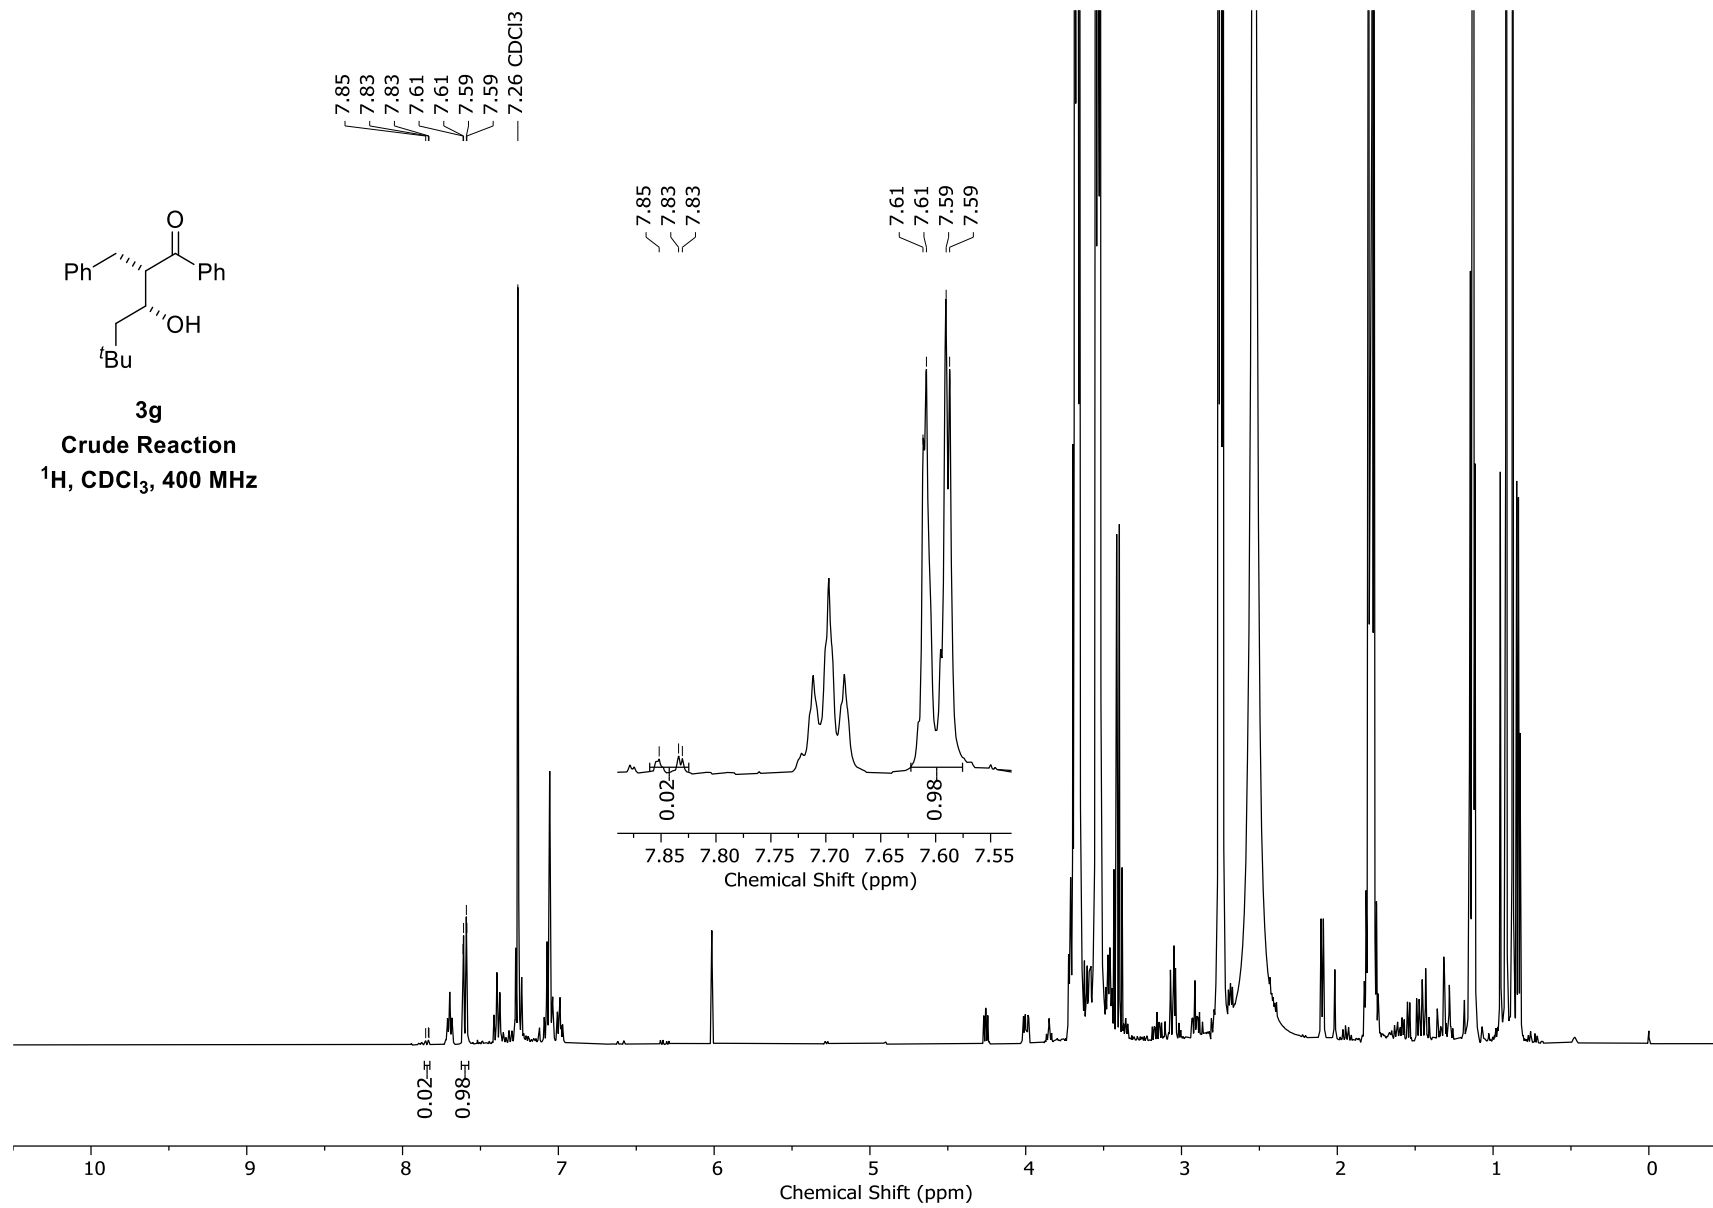

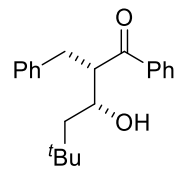

**3g**  
**<sup>1</sup>H, CDCl<sub>3</sub>, 500 MHz**

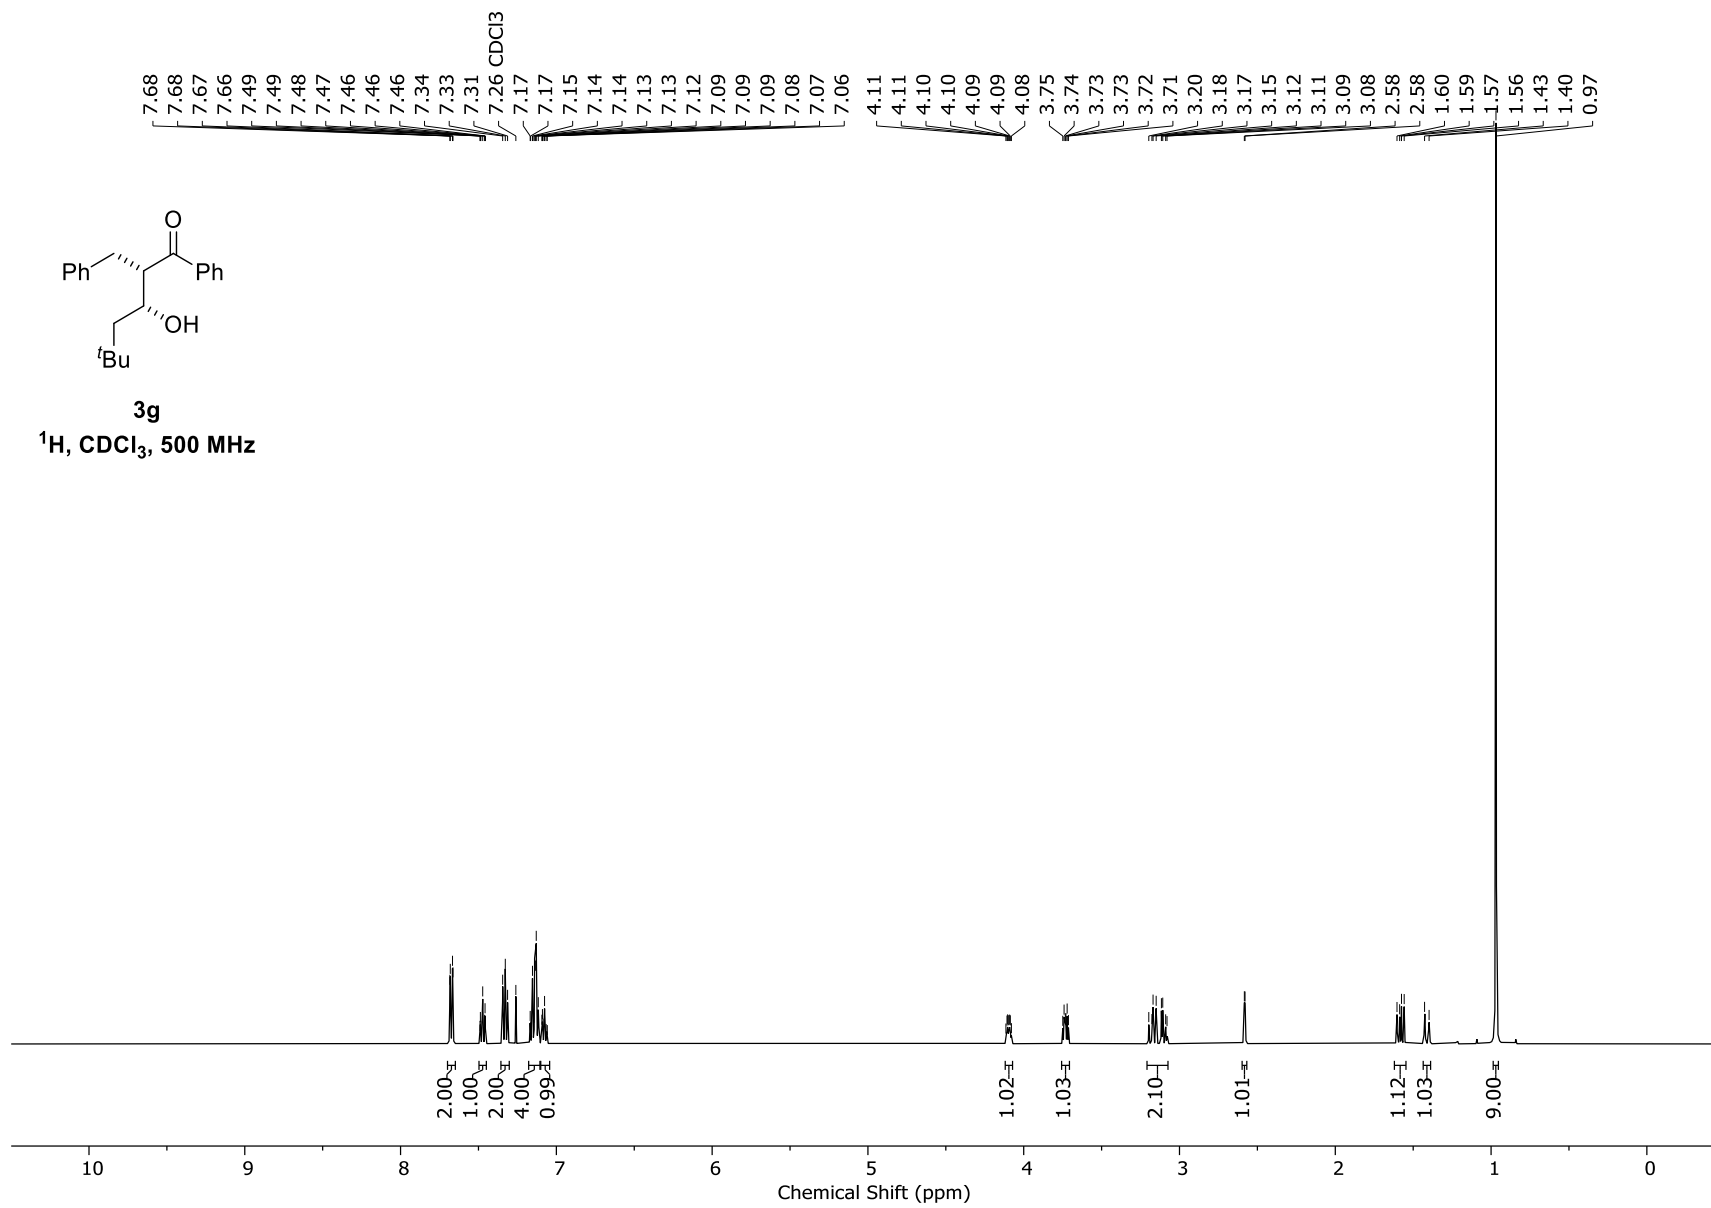

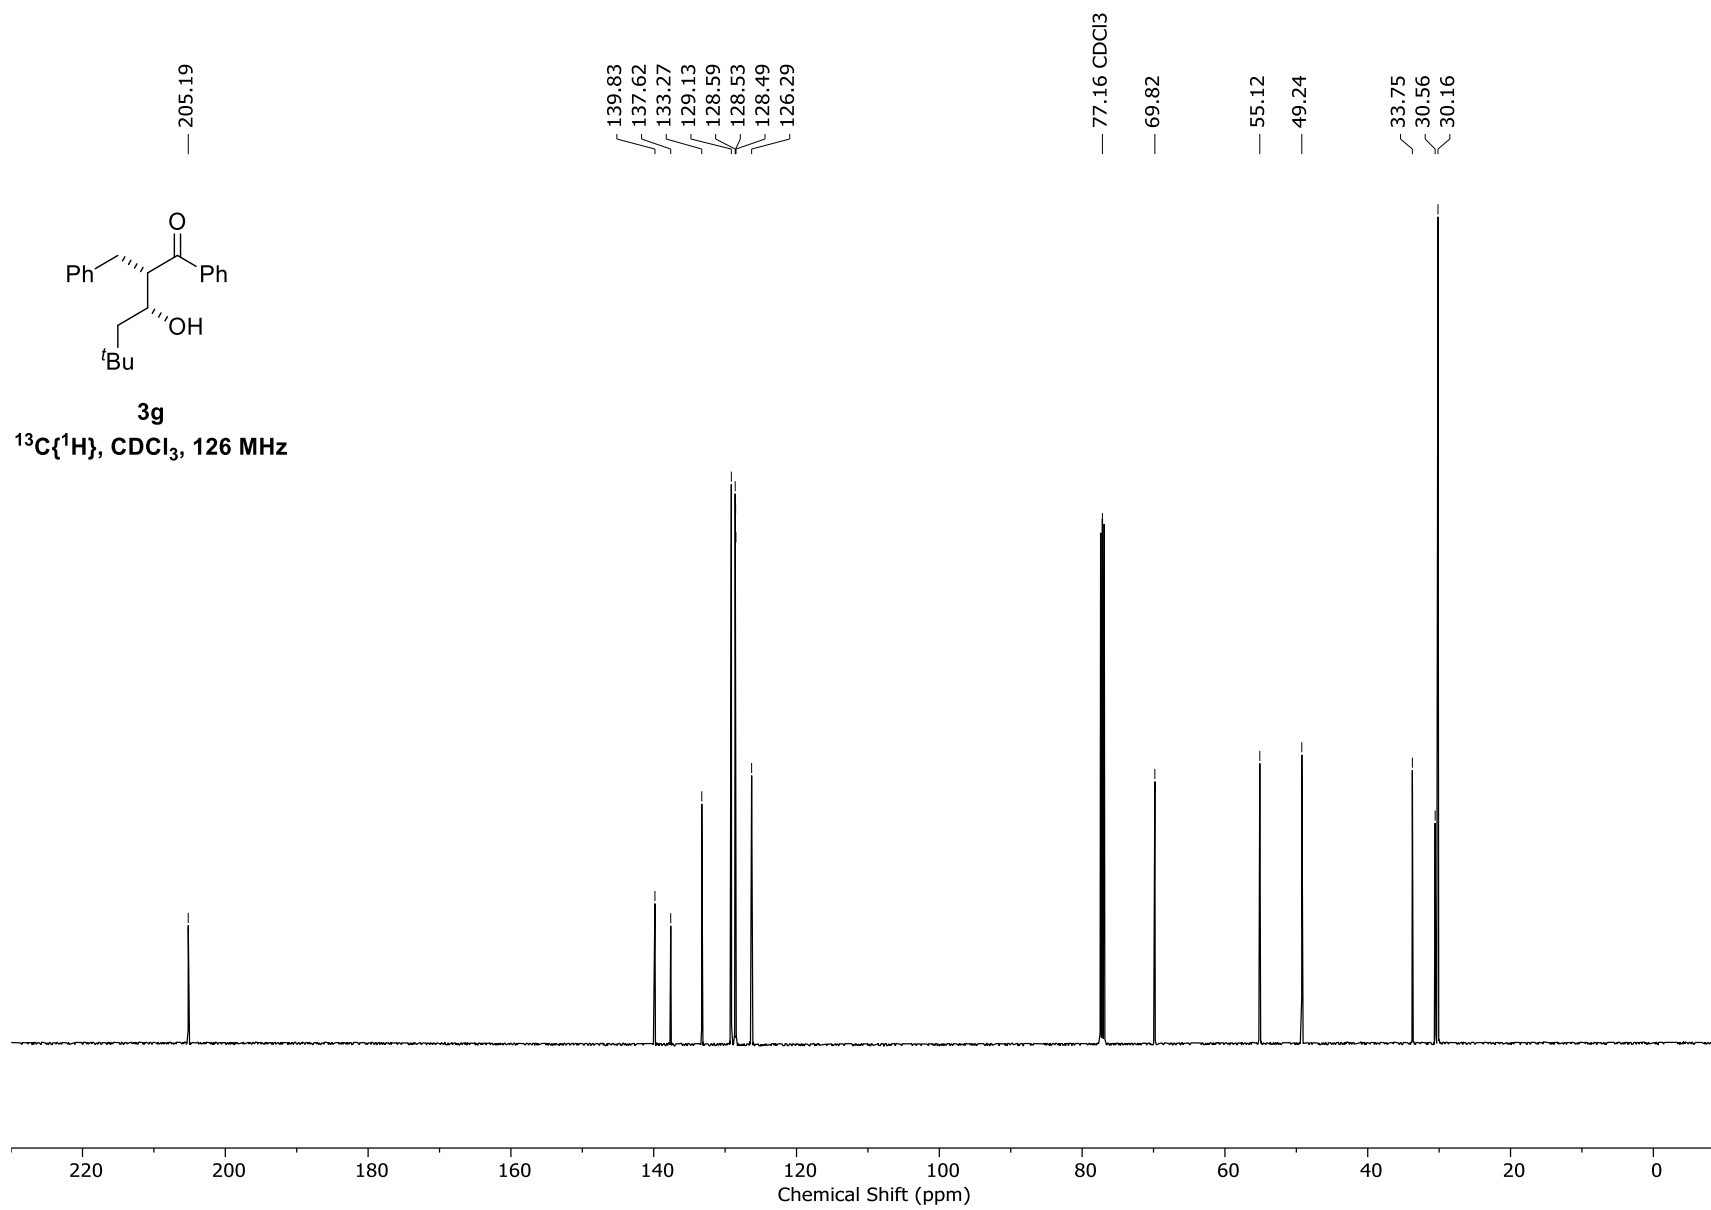

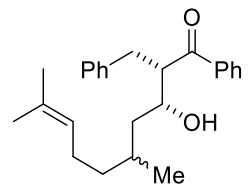

**3h**  
Crude Reaction  
 $^1\text{H}$ ,  $\text{CDCl}_3$ , 600 MHz

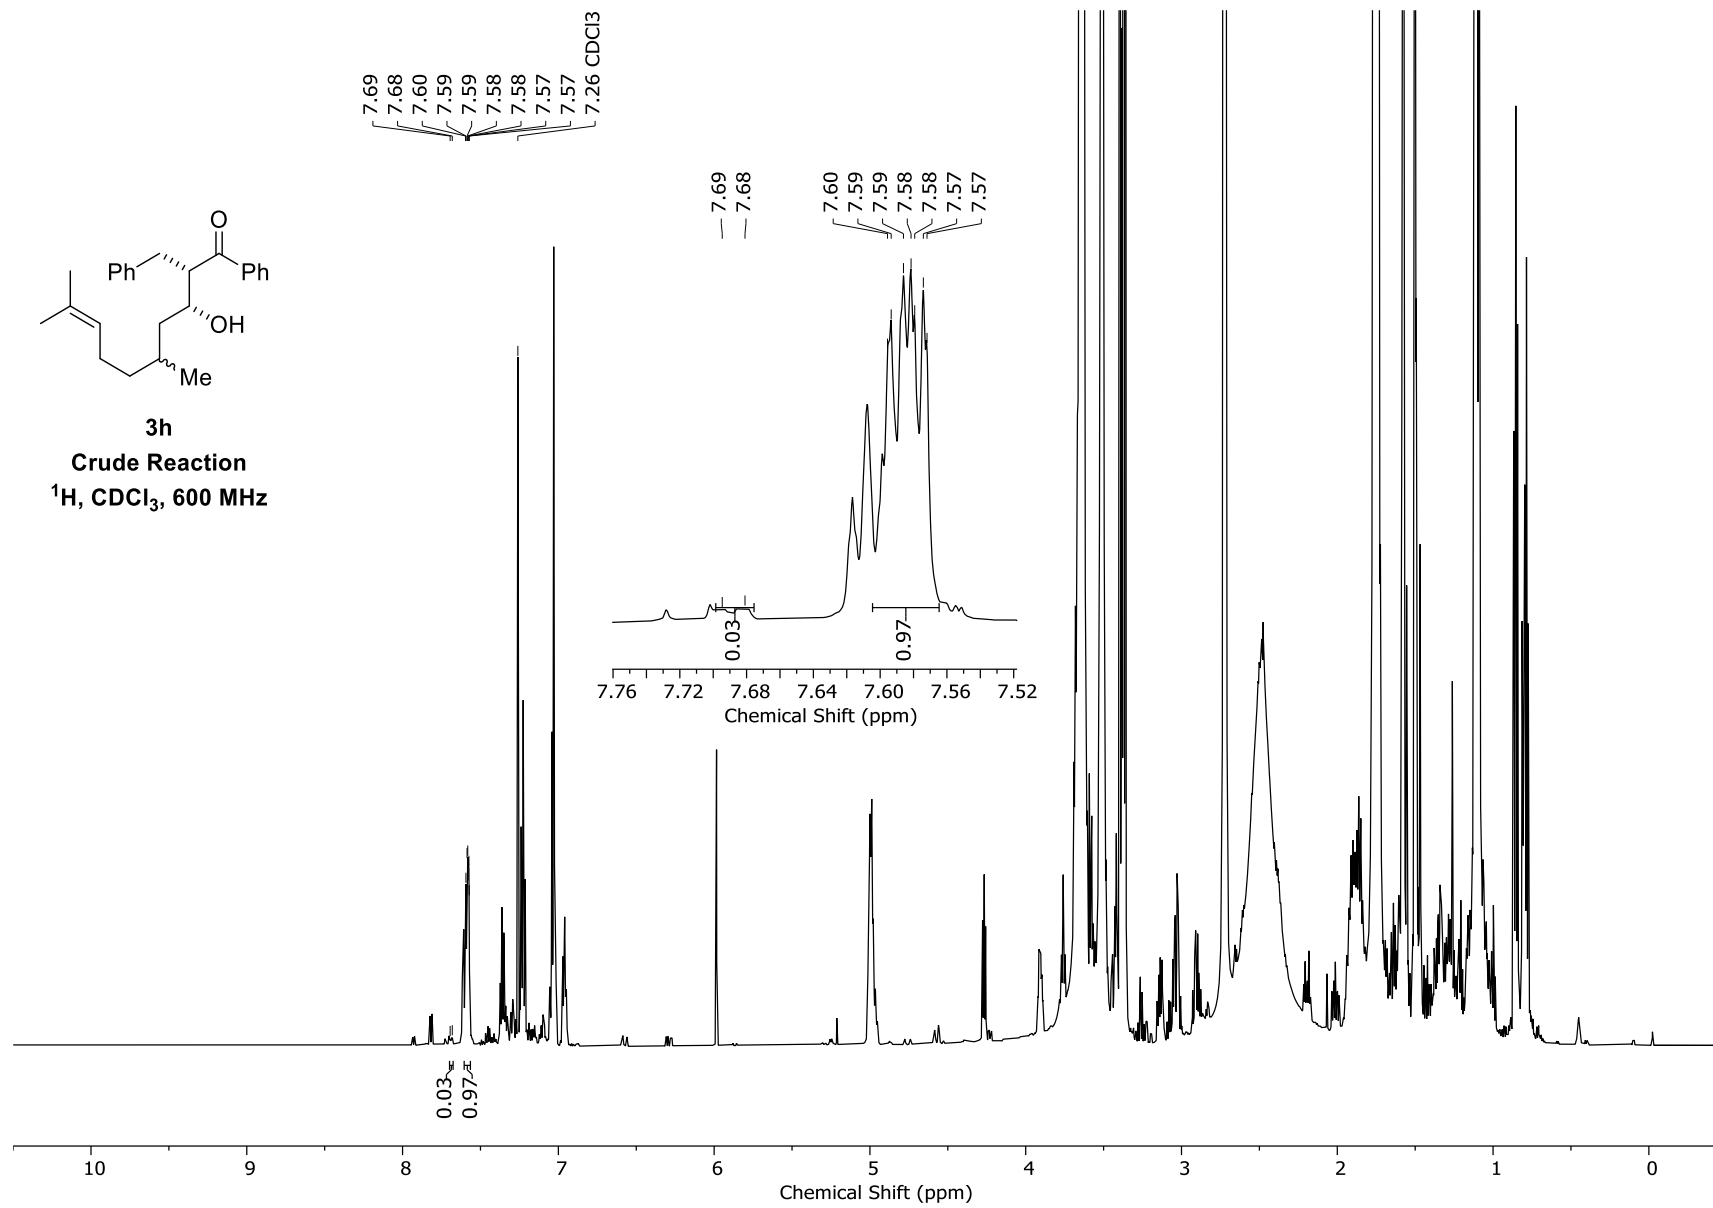

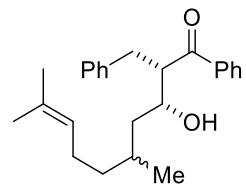

**3h**

<sup>1</sup>H, CDCl<sub>3</sub>, 500 MHz

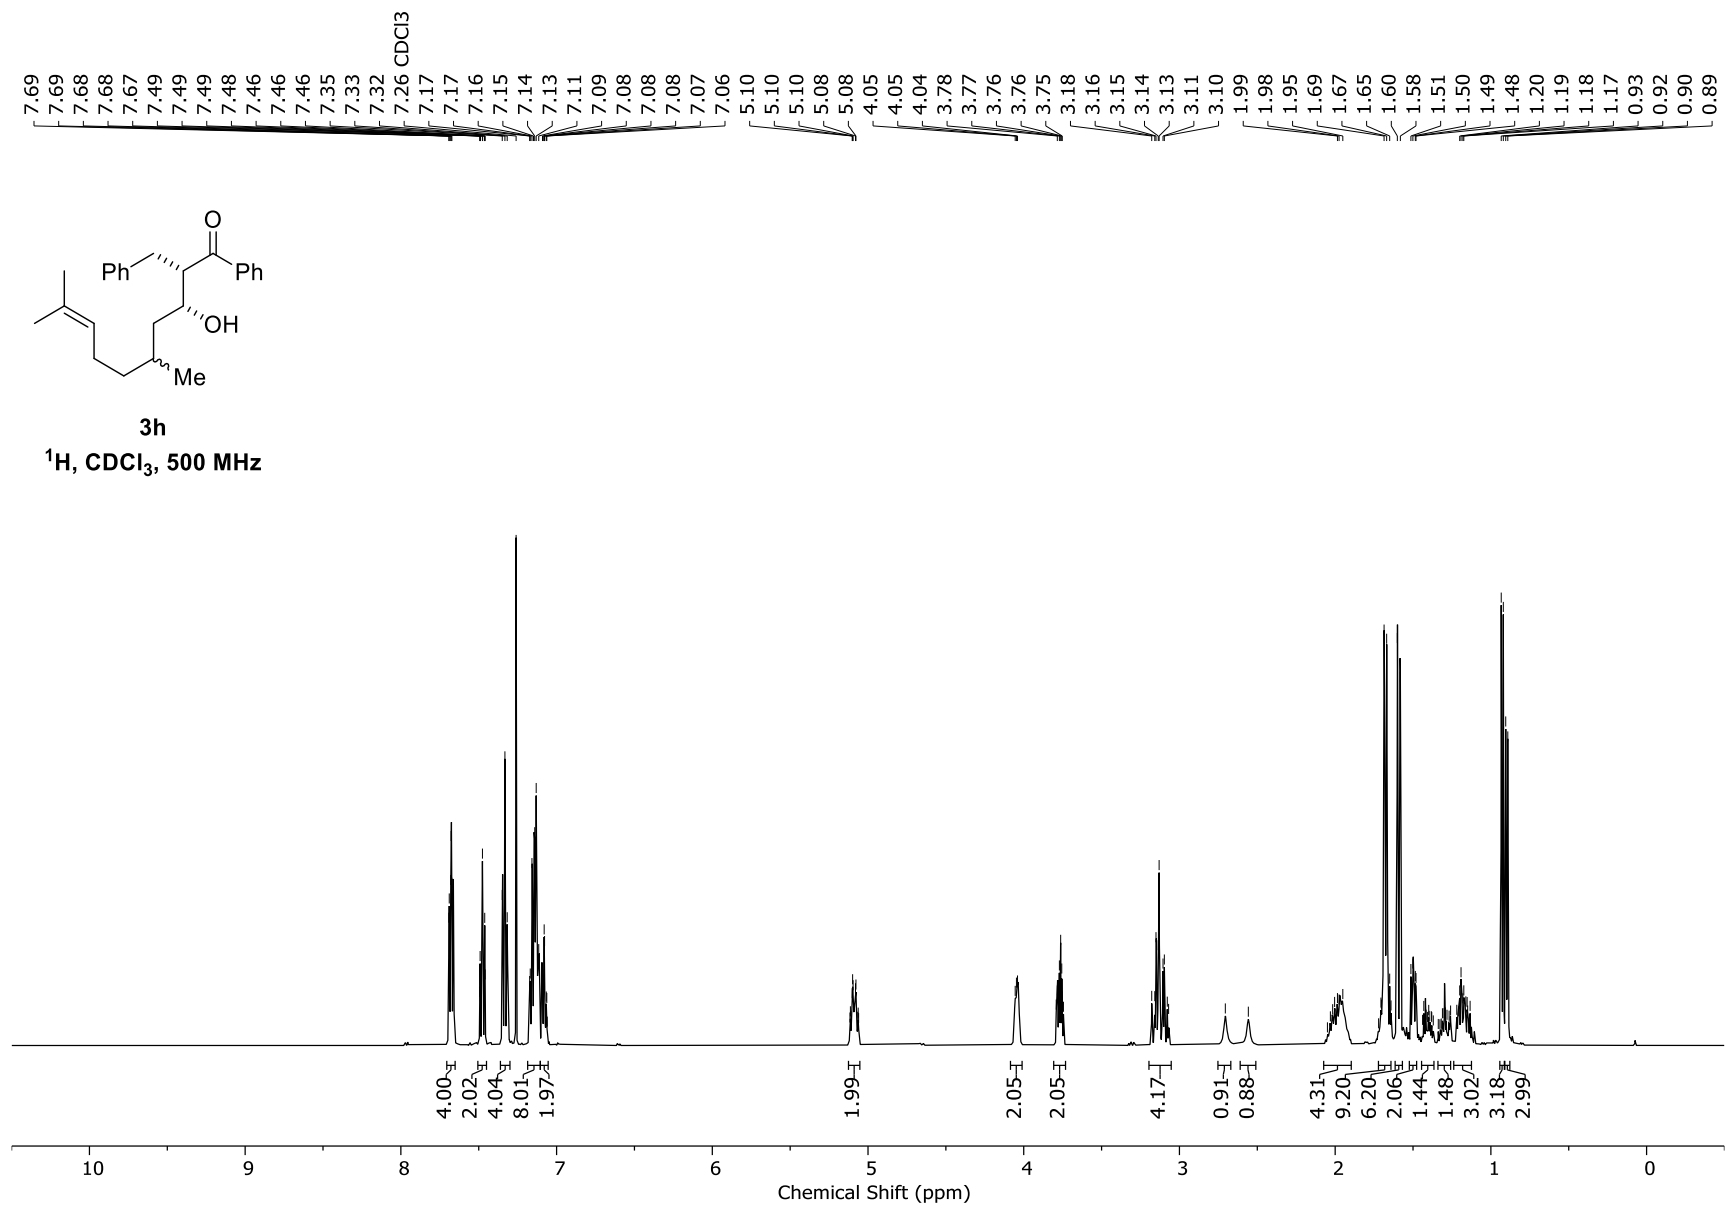

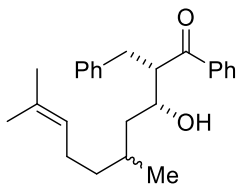

3h

$^{13}\text{C}\{^1\text{H}\}$ ,  $\text{CDCl}_3$ , 126 MHz

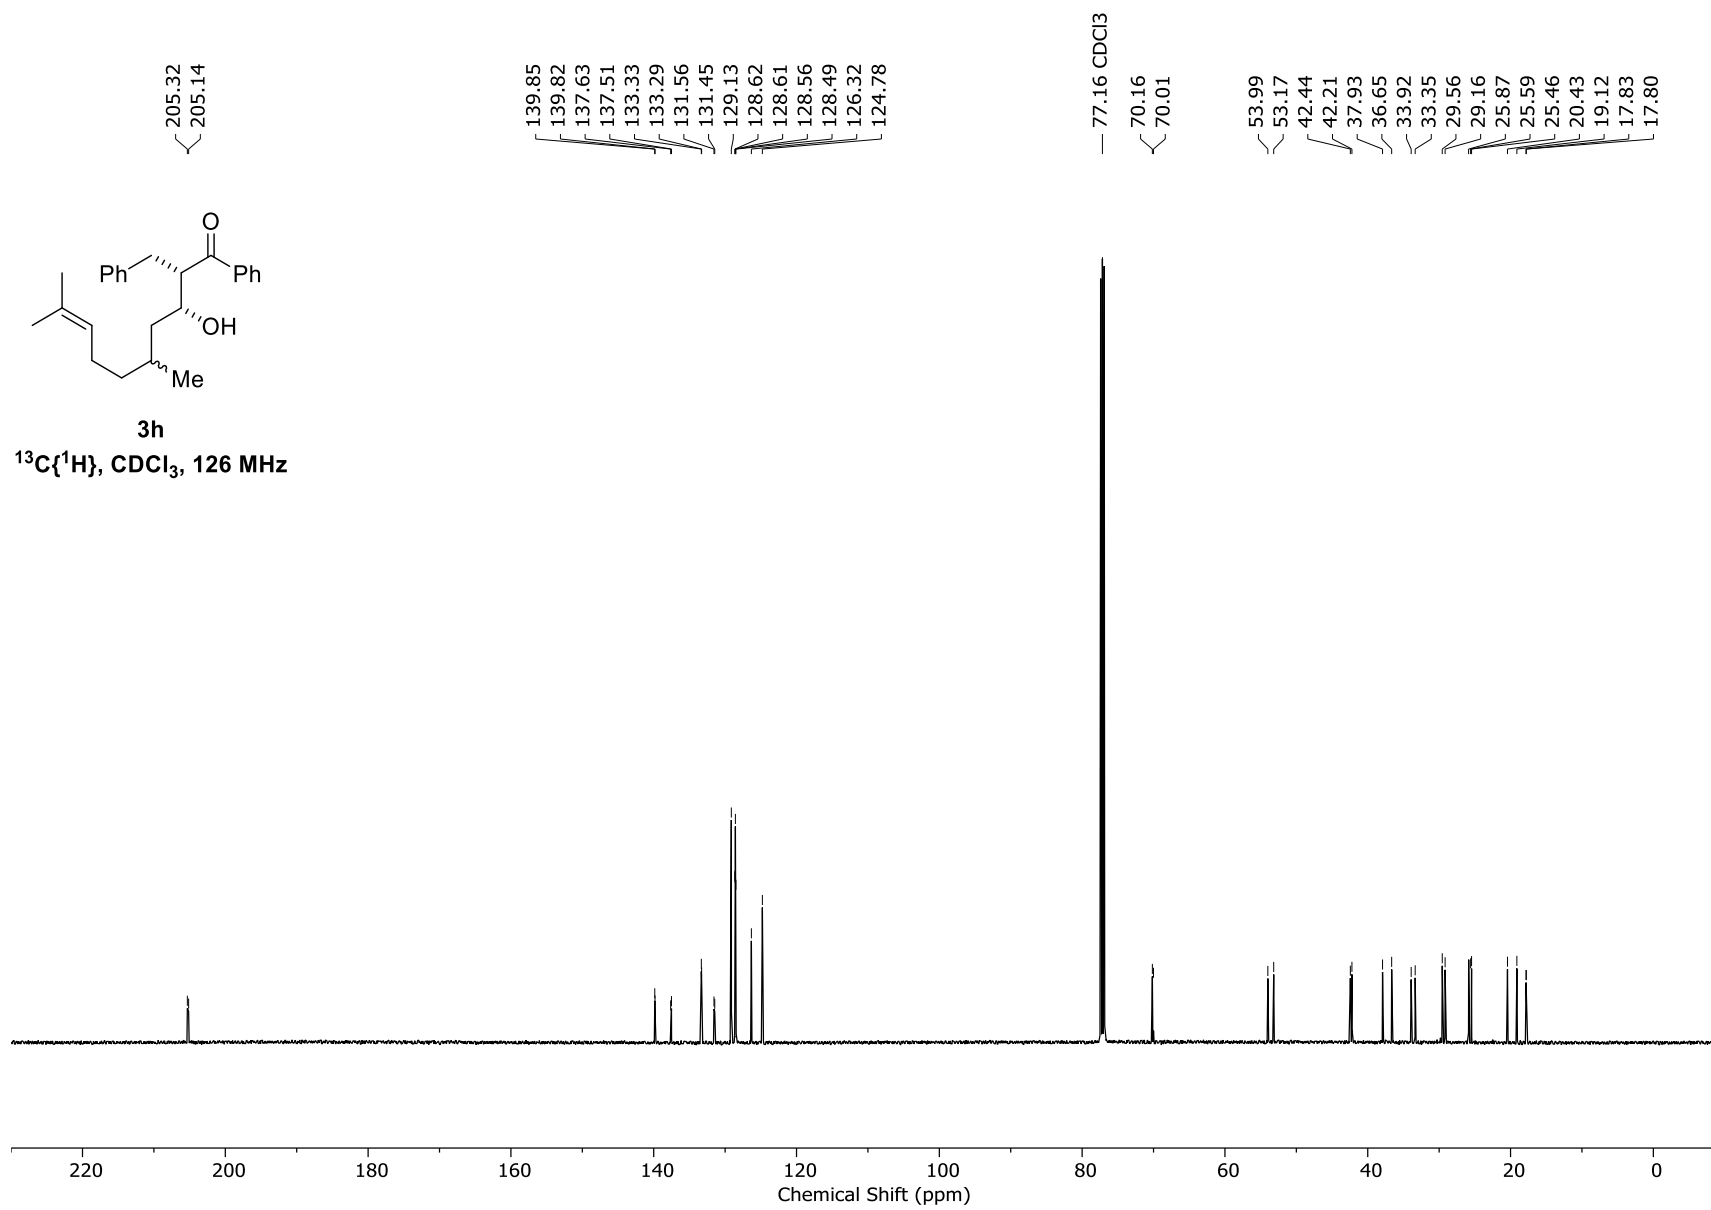

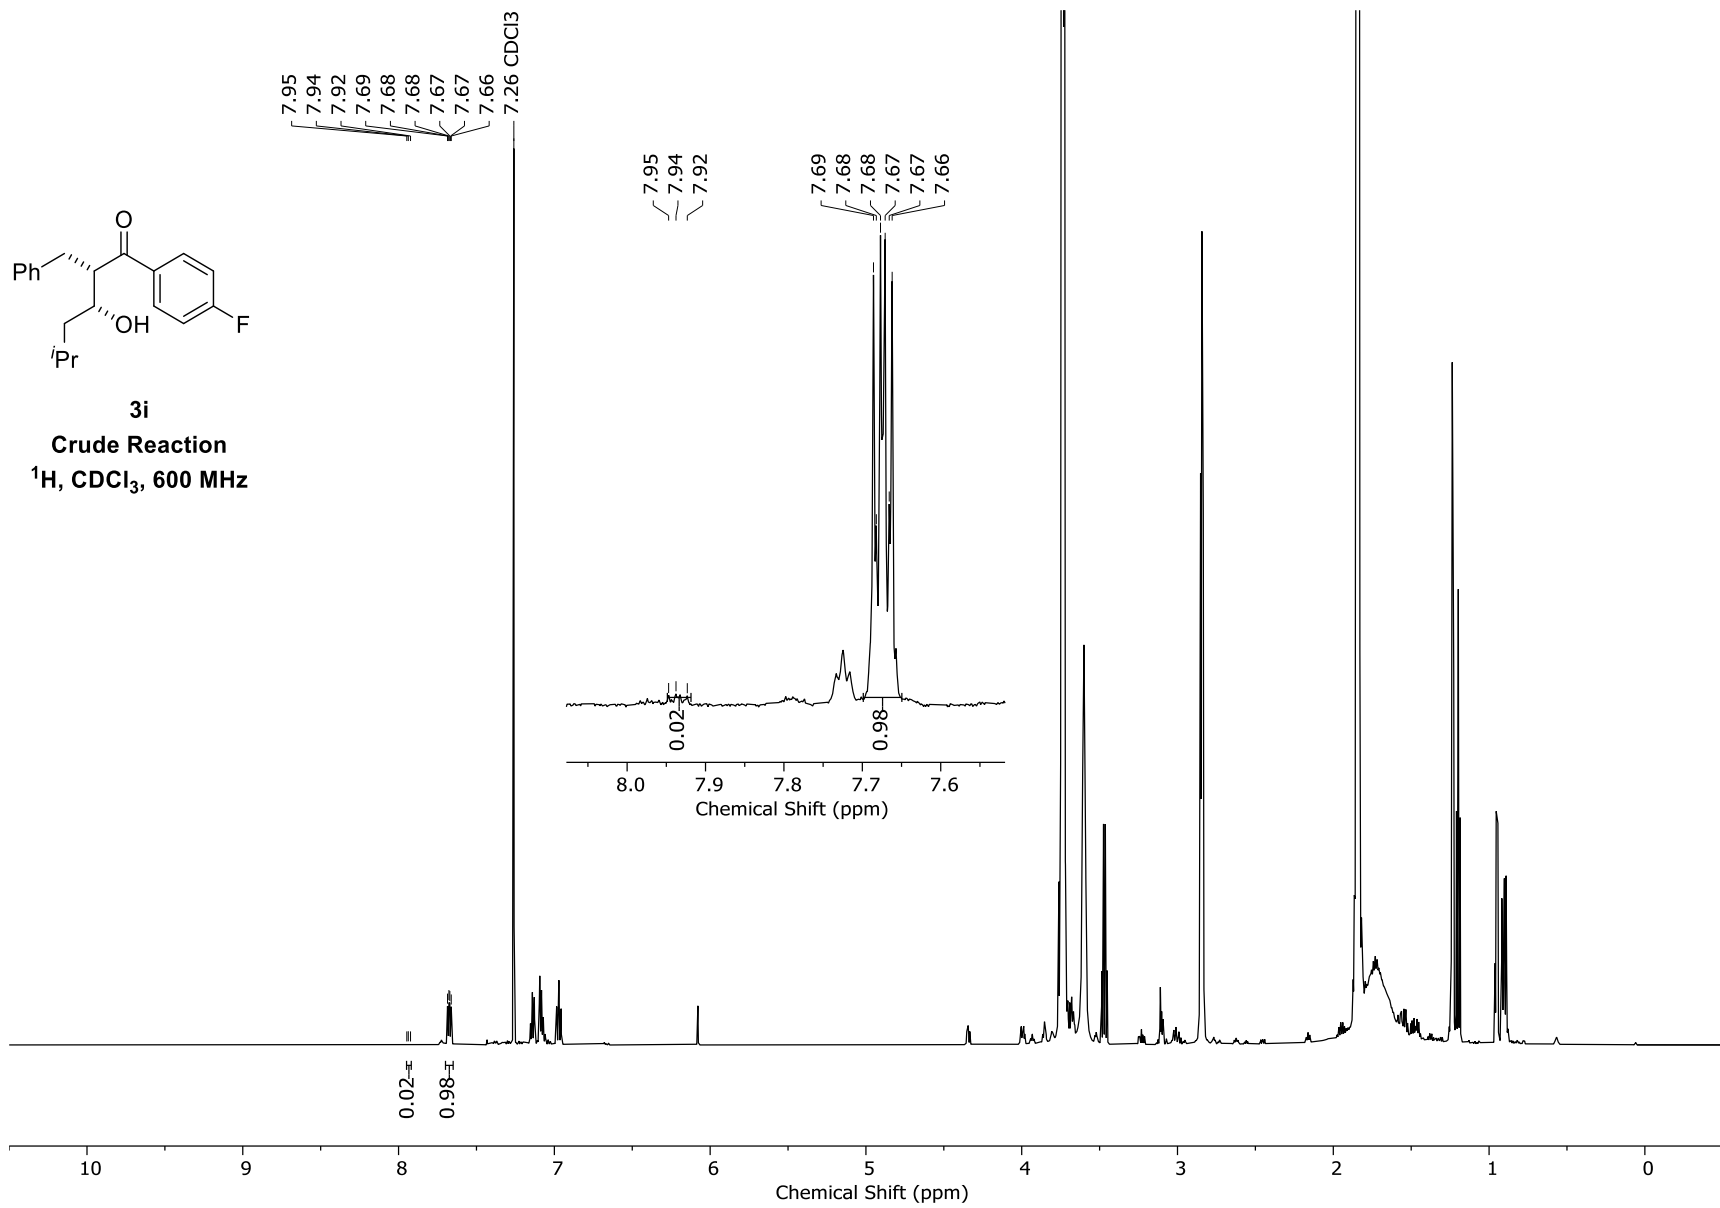

7.70  
7.70  
7.69  
7.69  
7.68  
7.68  
7.67  
7.26 CDCl3  
7.17  
7.17  
7.16  
7.16  
7.15  
7.15  
7.15  
7.15  
7.14  
7.14  
7.11  
7.11  
7.10  
7.10  
7.09  
7.09  
7.09  
7.08  
7.07  
7.07  
6.99  
6.99  
6.98  
6.96  
6.96  
4.04  
4.03  
4.02  
4.02  
4.01  
4.01  
4.00  
4.00  
3.72  
3.71  
3.71  
3.70  
3.69  
3.69  
3.13  
3.12  
3.11  
2.71  
1.85  
1.84  
1.84  
1.82  
1.62  
1.61  
1.60  
1.59  
1.58  
1.57  
1.56  
1.29  
1.28  
1.27  
1.26  
1.26  
1.25  
1.25  
1.24  
1.23  
0.94  
0.93  
0.92  
0.91

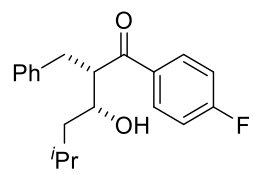

**3i**  
**<sup>1</sup>H, CDCl<sub>3</sub>, 500 MHz**

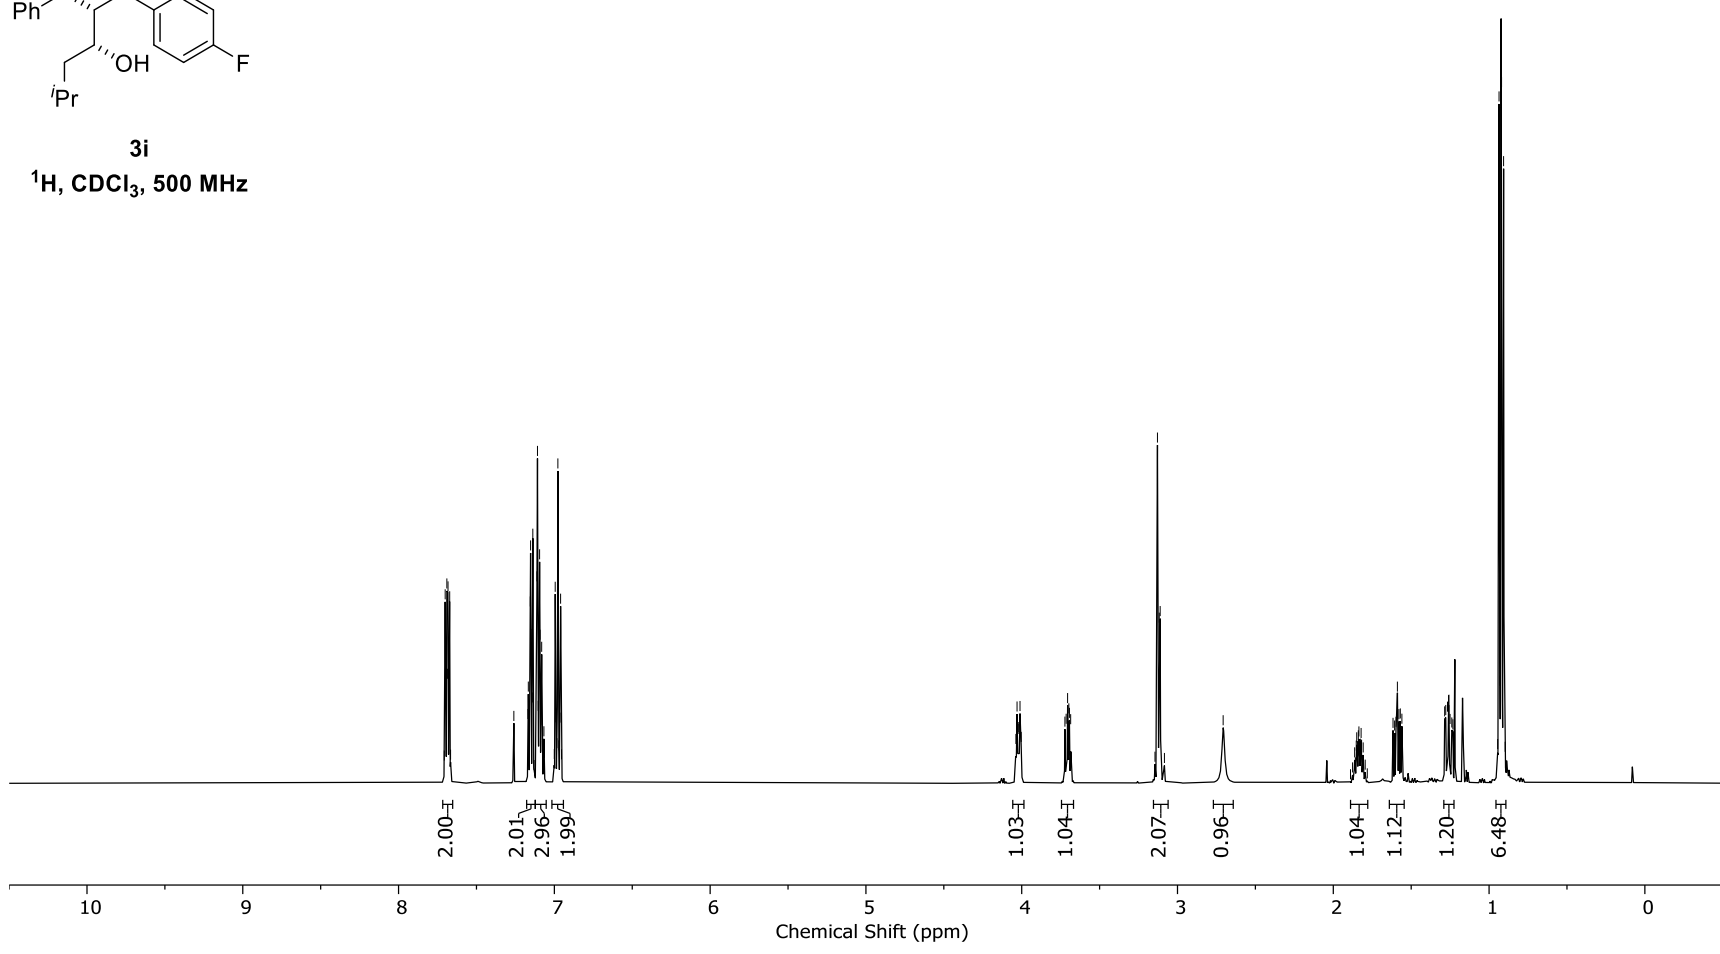

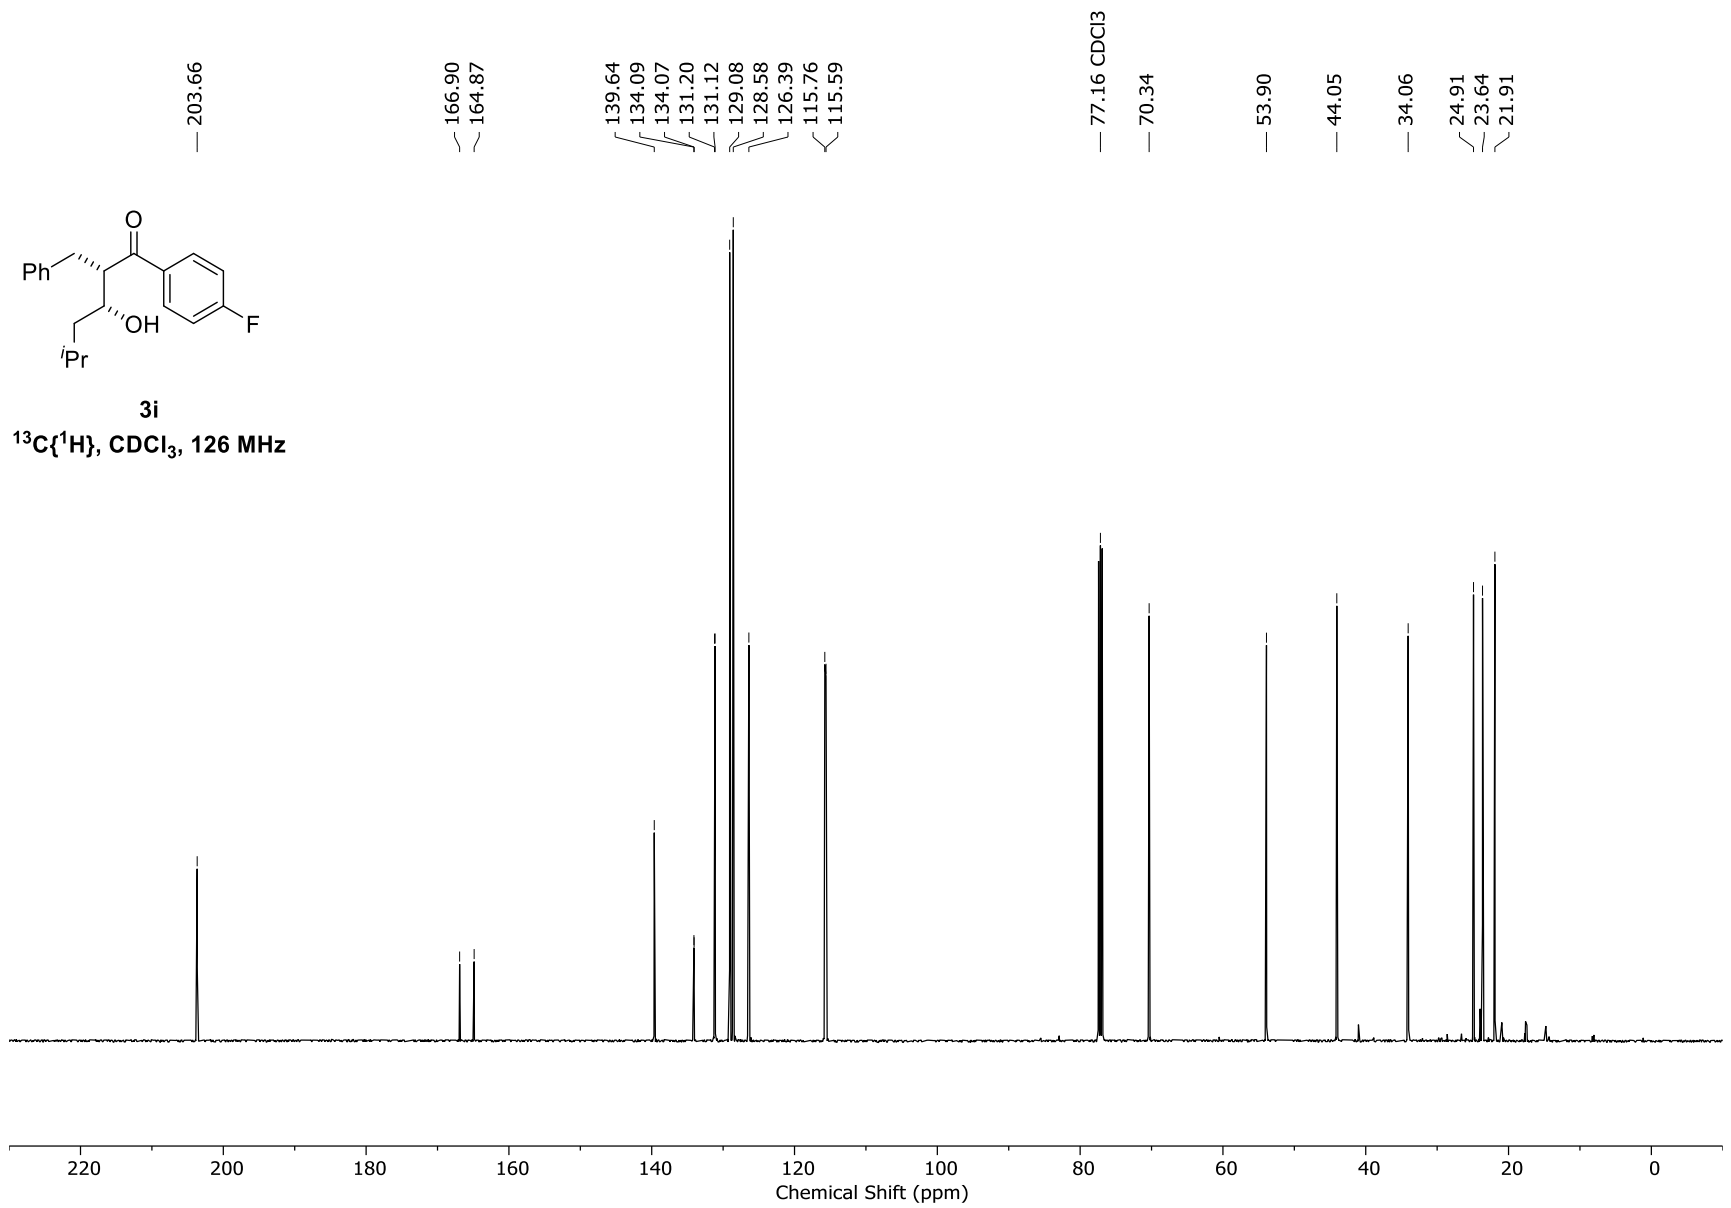

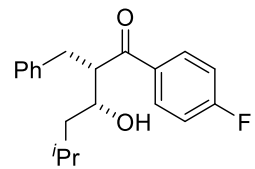

**3i**  
 $^{19}\text{F}\{^1\text{H}\}$ ,  $\text{CDCl}_3$ , 470 MHz

-104.84  
-104.86  
-104.86  
-104.87  
-104.87  
-104.88  
-104.89  
-104.89

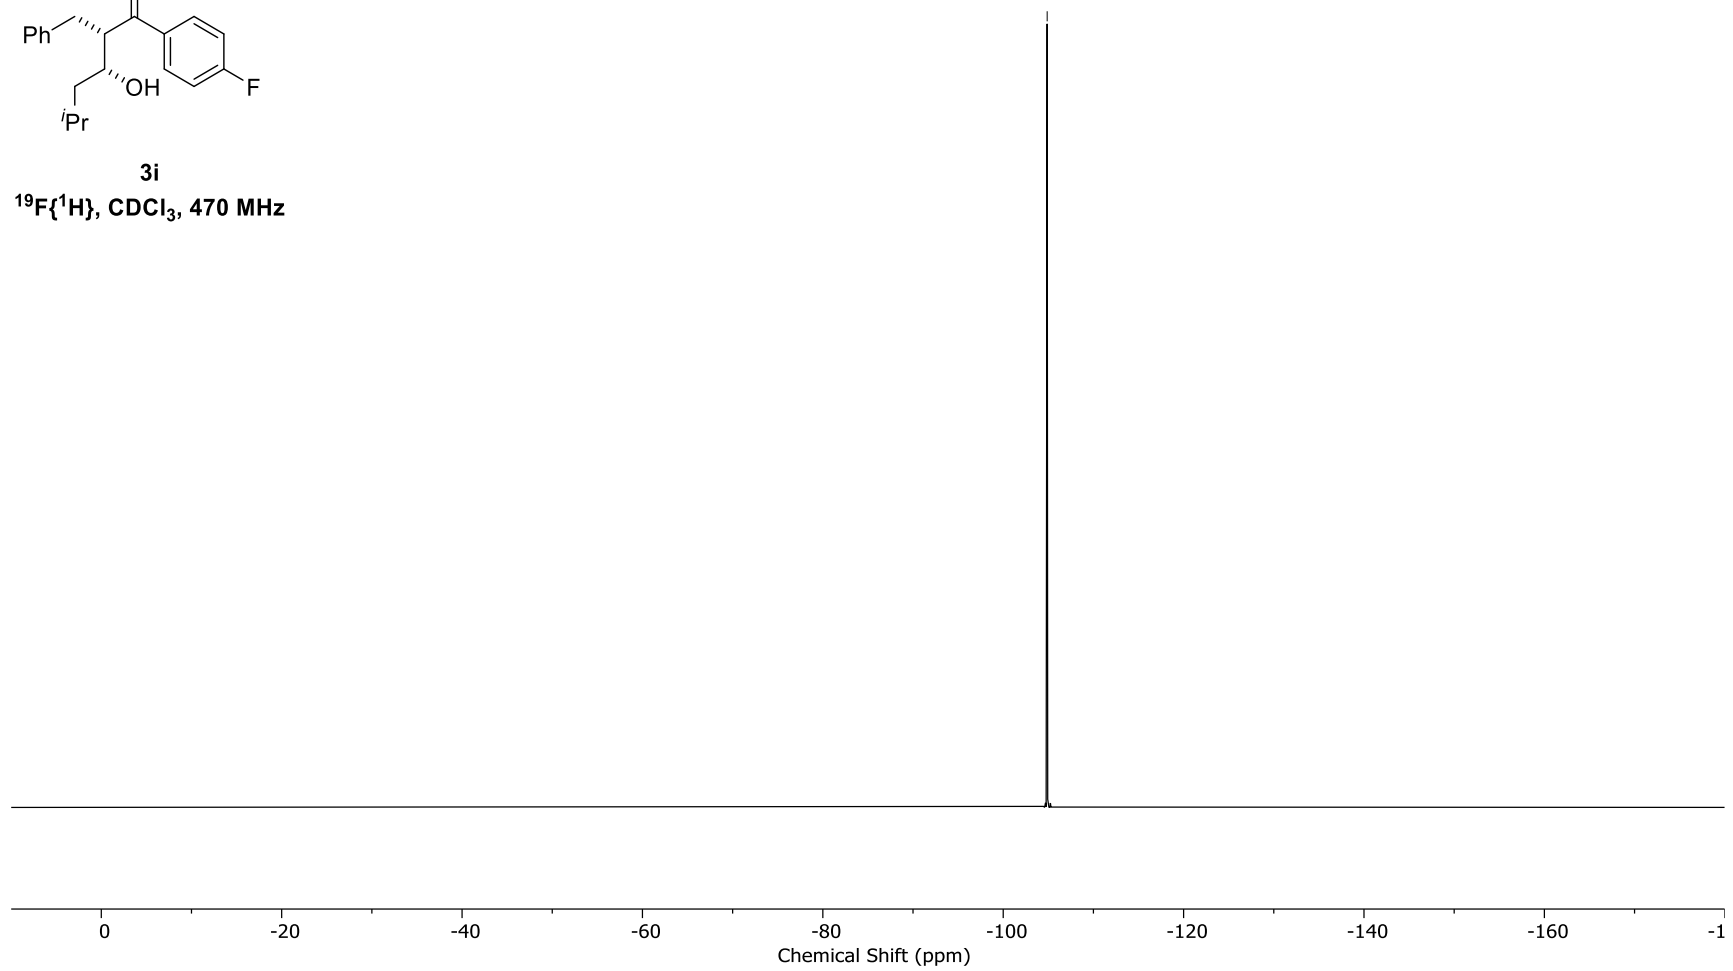

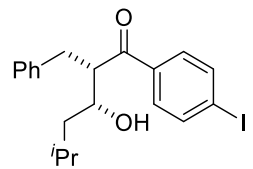

**3j**  
**Crude Reaction**  
 $^1\text{H}$ ,  $\text{CDCl}_3$ , 500 MHz

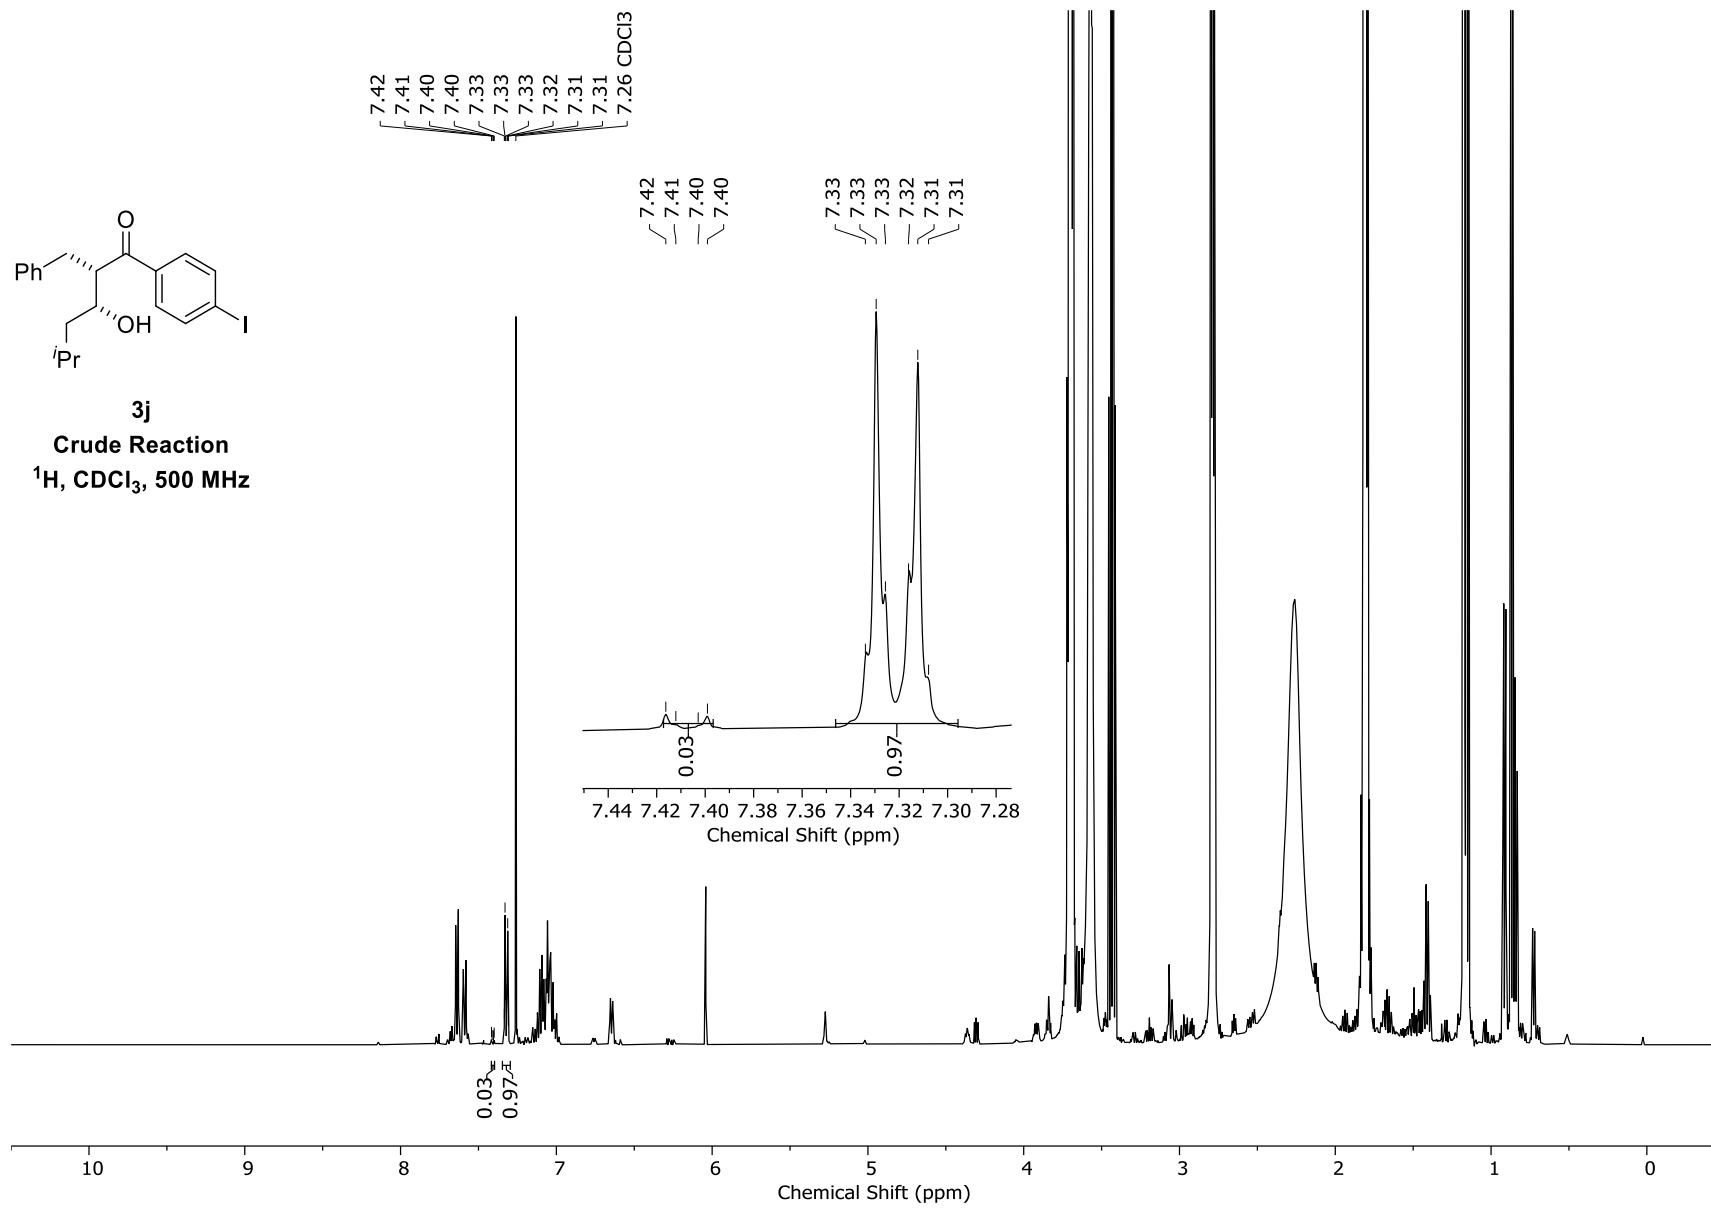

7.69  
7.69  
7.68  
7.67  
7.37  
7.36  
7.36  
7.35  
7.35  
7.34  
7.26 CDCl3  
7.18  
7.17  
7.17  
7.16  
7.16  
7.15  
7.15  
7.11  
7.10  
7.10  
7.09  
7.09  
7.08  
7.08  
4.02  
4.01  
4.00  
4.00  
4.00  
3.99  
3.98  
3.70  
3.69  
3.68  
3.68  
3.67  
3.66  
3.12  
3.10  
2.57  
2.57  
1.84  
1.84  
1.83  
1.82  
1.81  
1.80  
1.80  
1.59  
1.58  
1.58  
1.57  
1.56  
1.55  
1.54  
1.27  
1.26  
1.25  
1.24  
1.23  
0.93  
0.91  
0.91  
0.90

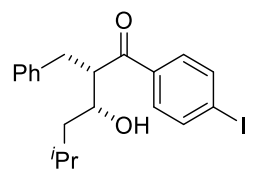

**3j**  
**<sup>1</sup>H, CDCl<sub>3</sub>, 500 MHz**

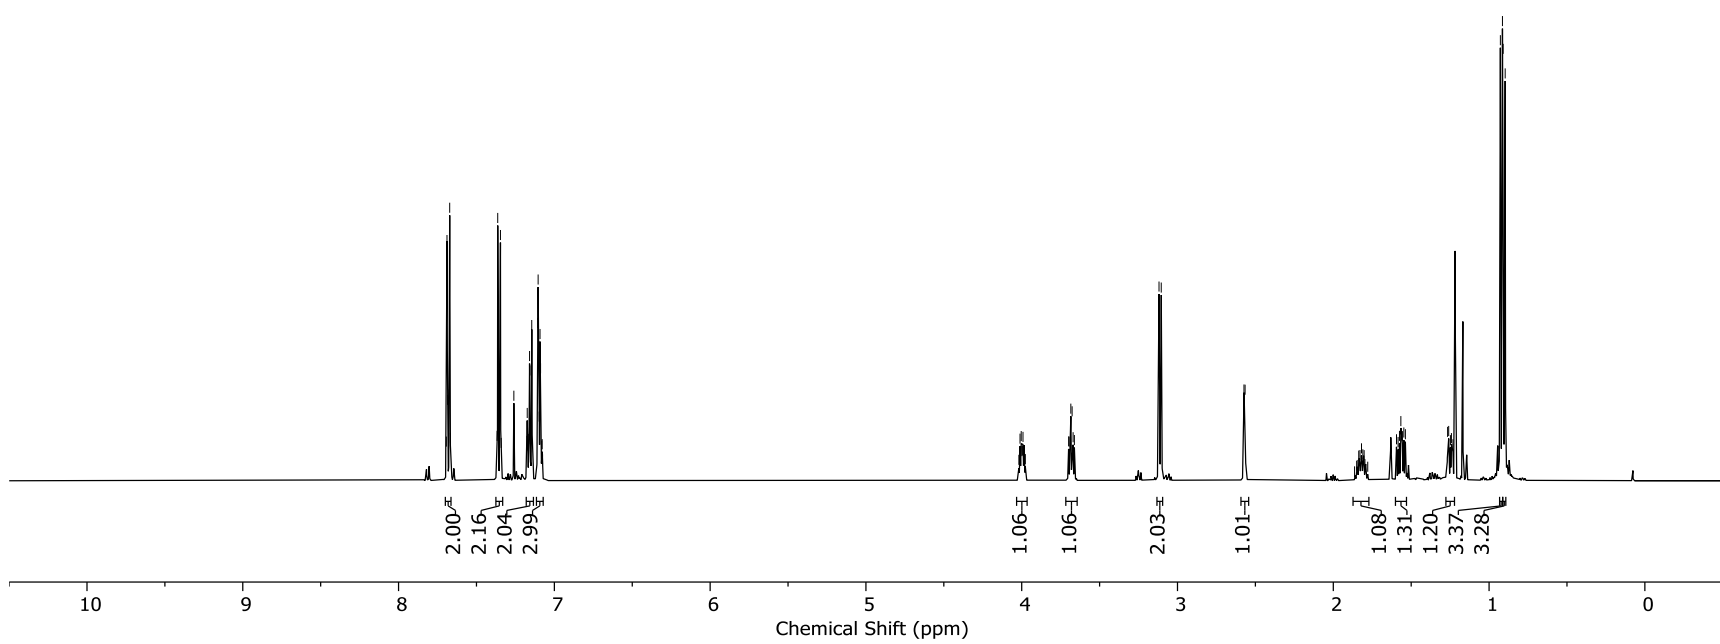

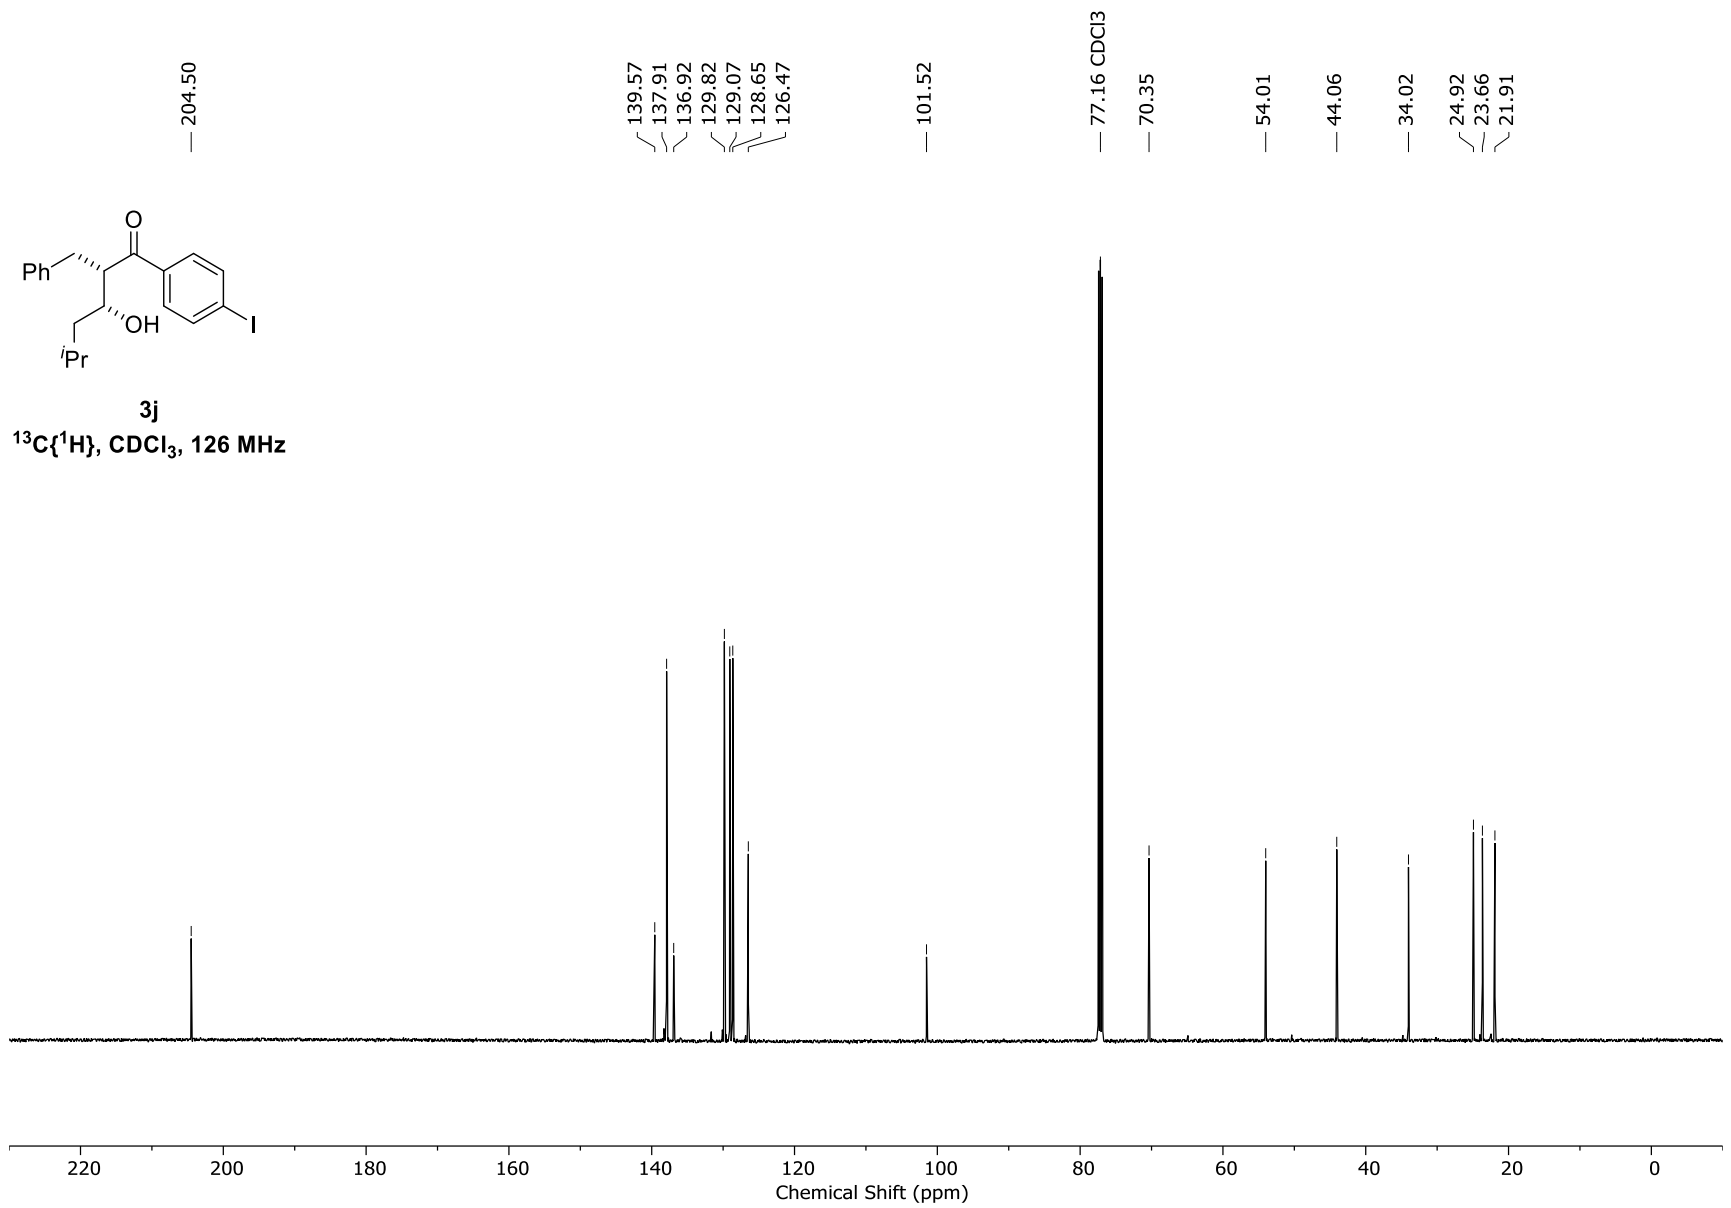

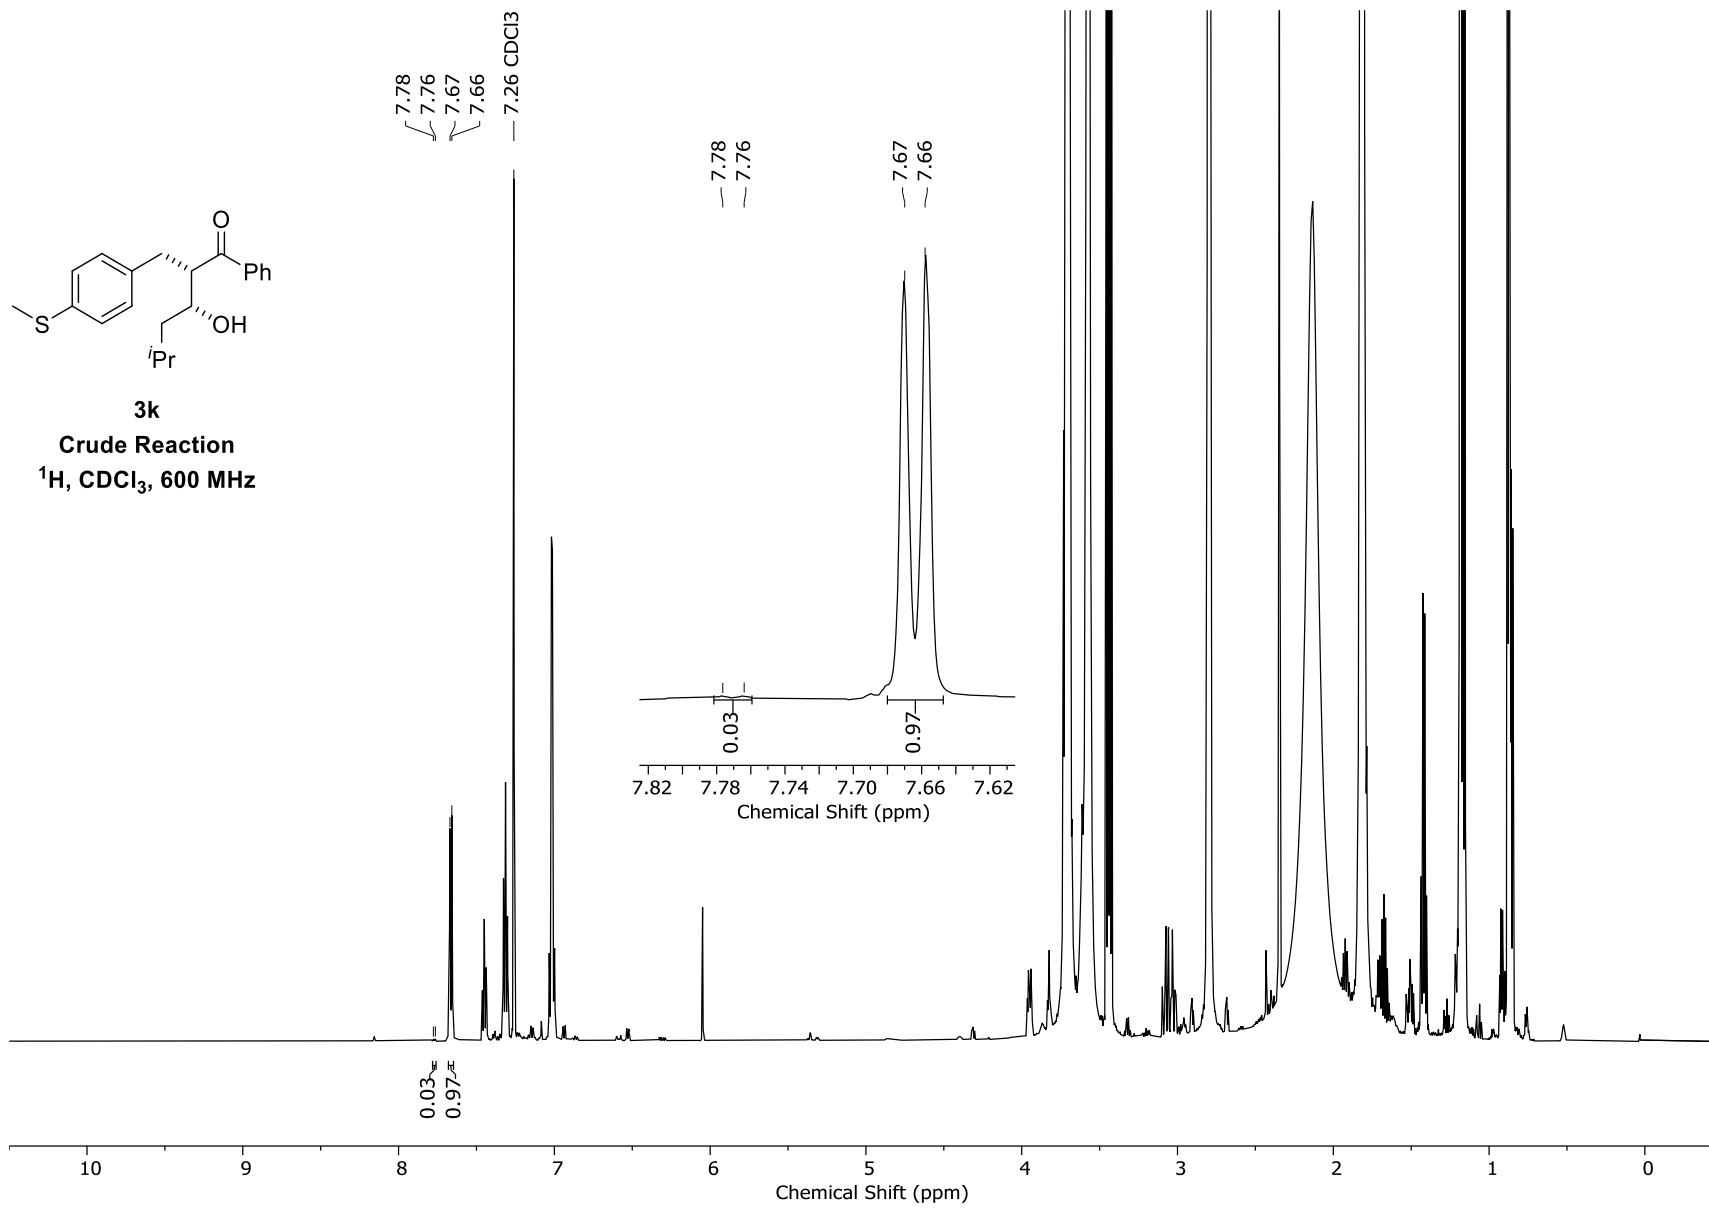

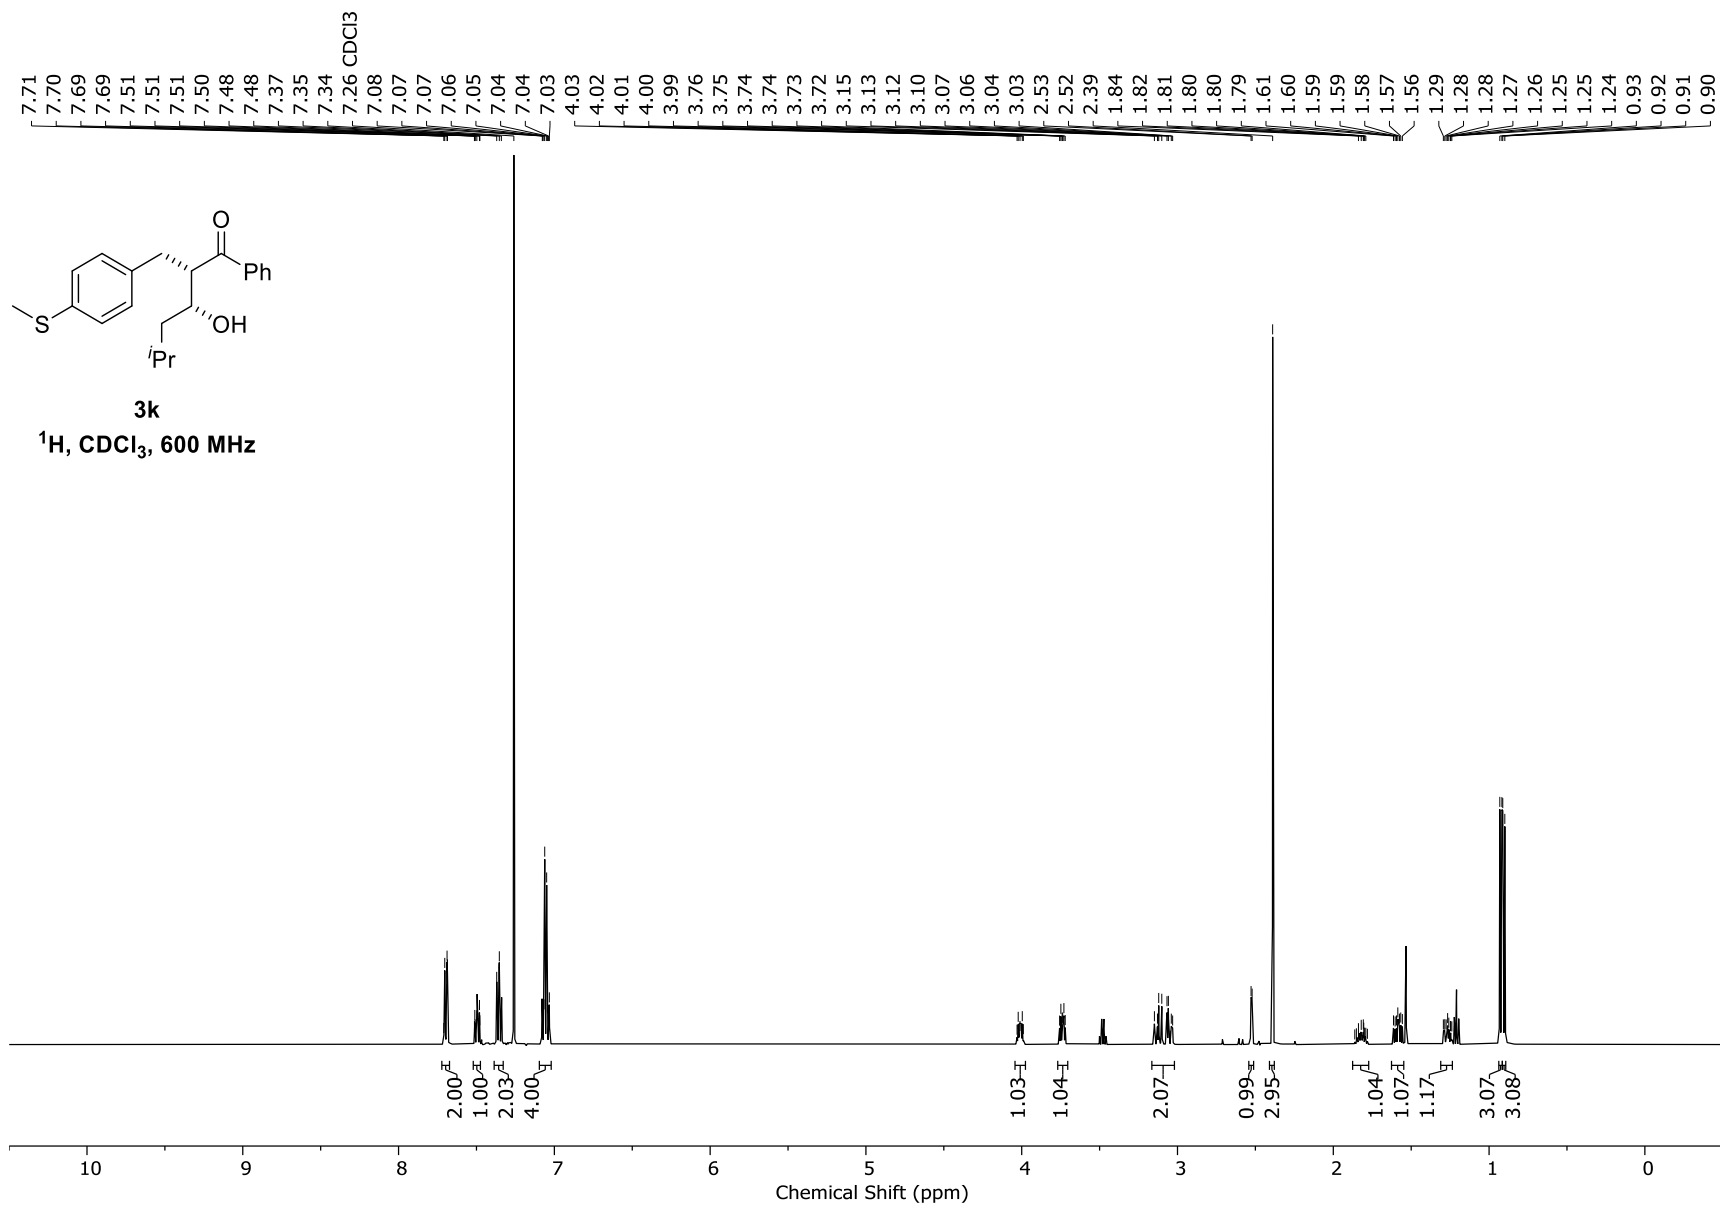

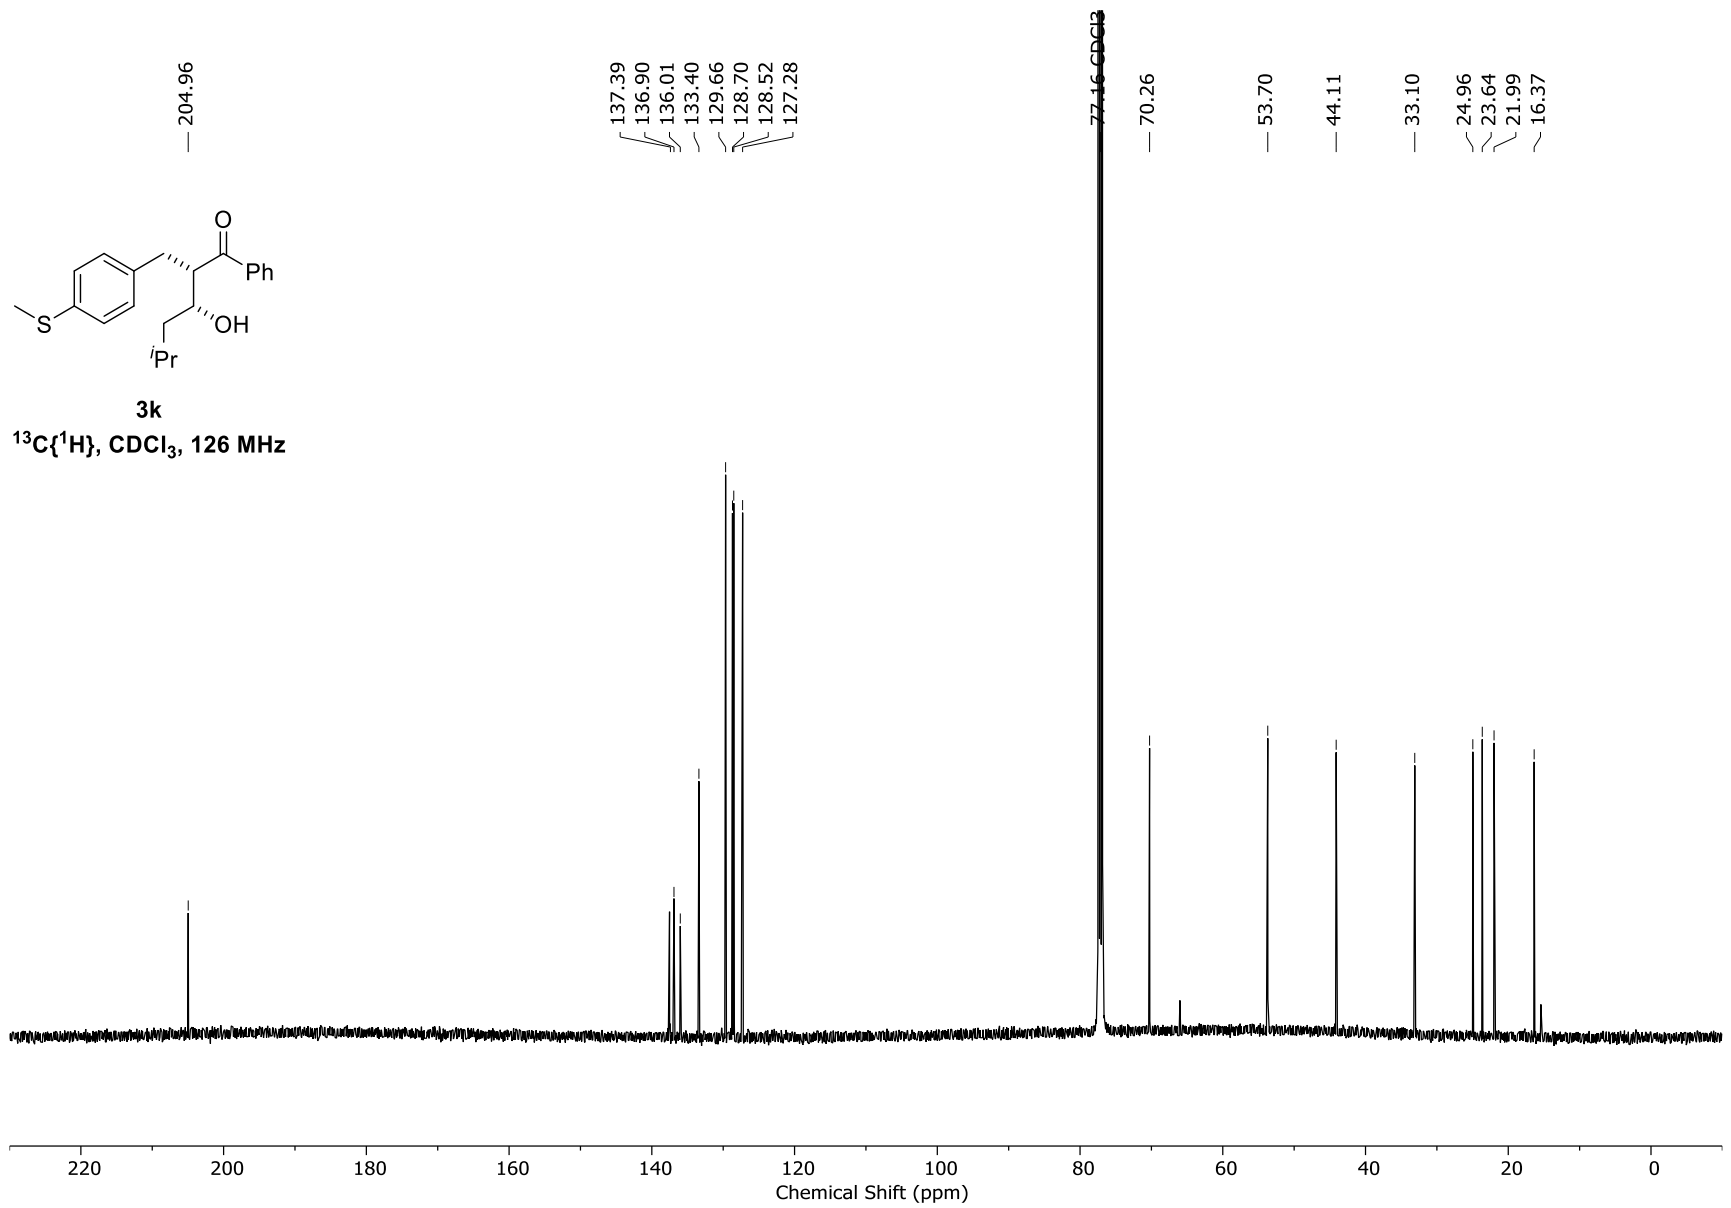

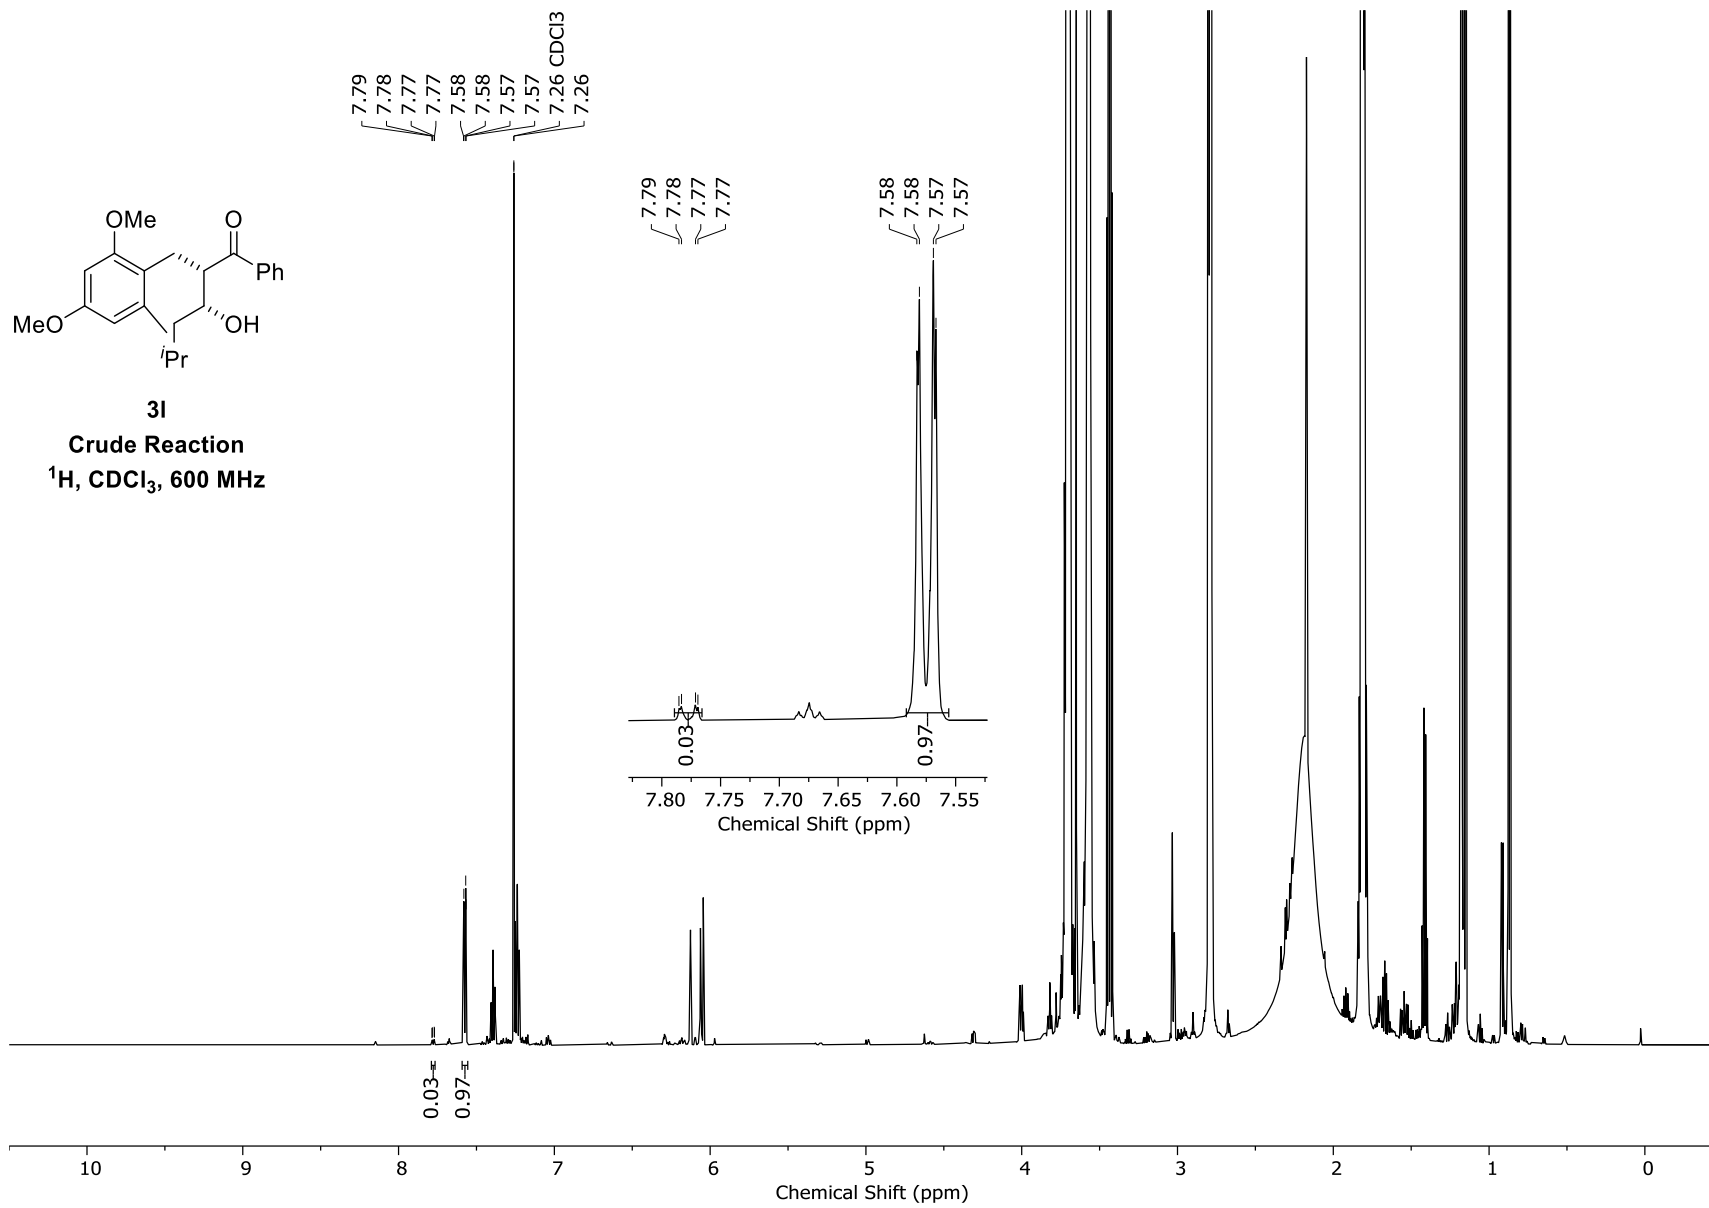

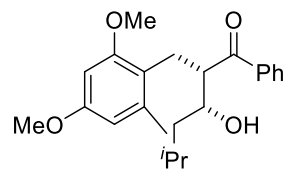

**3l**  
<sup>1</sup>H, CDCl<sub>3</sub>, 500 MHz

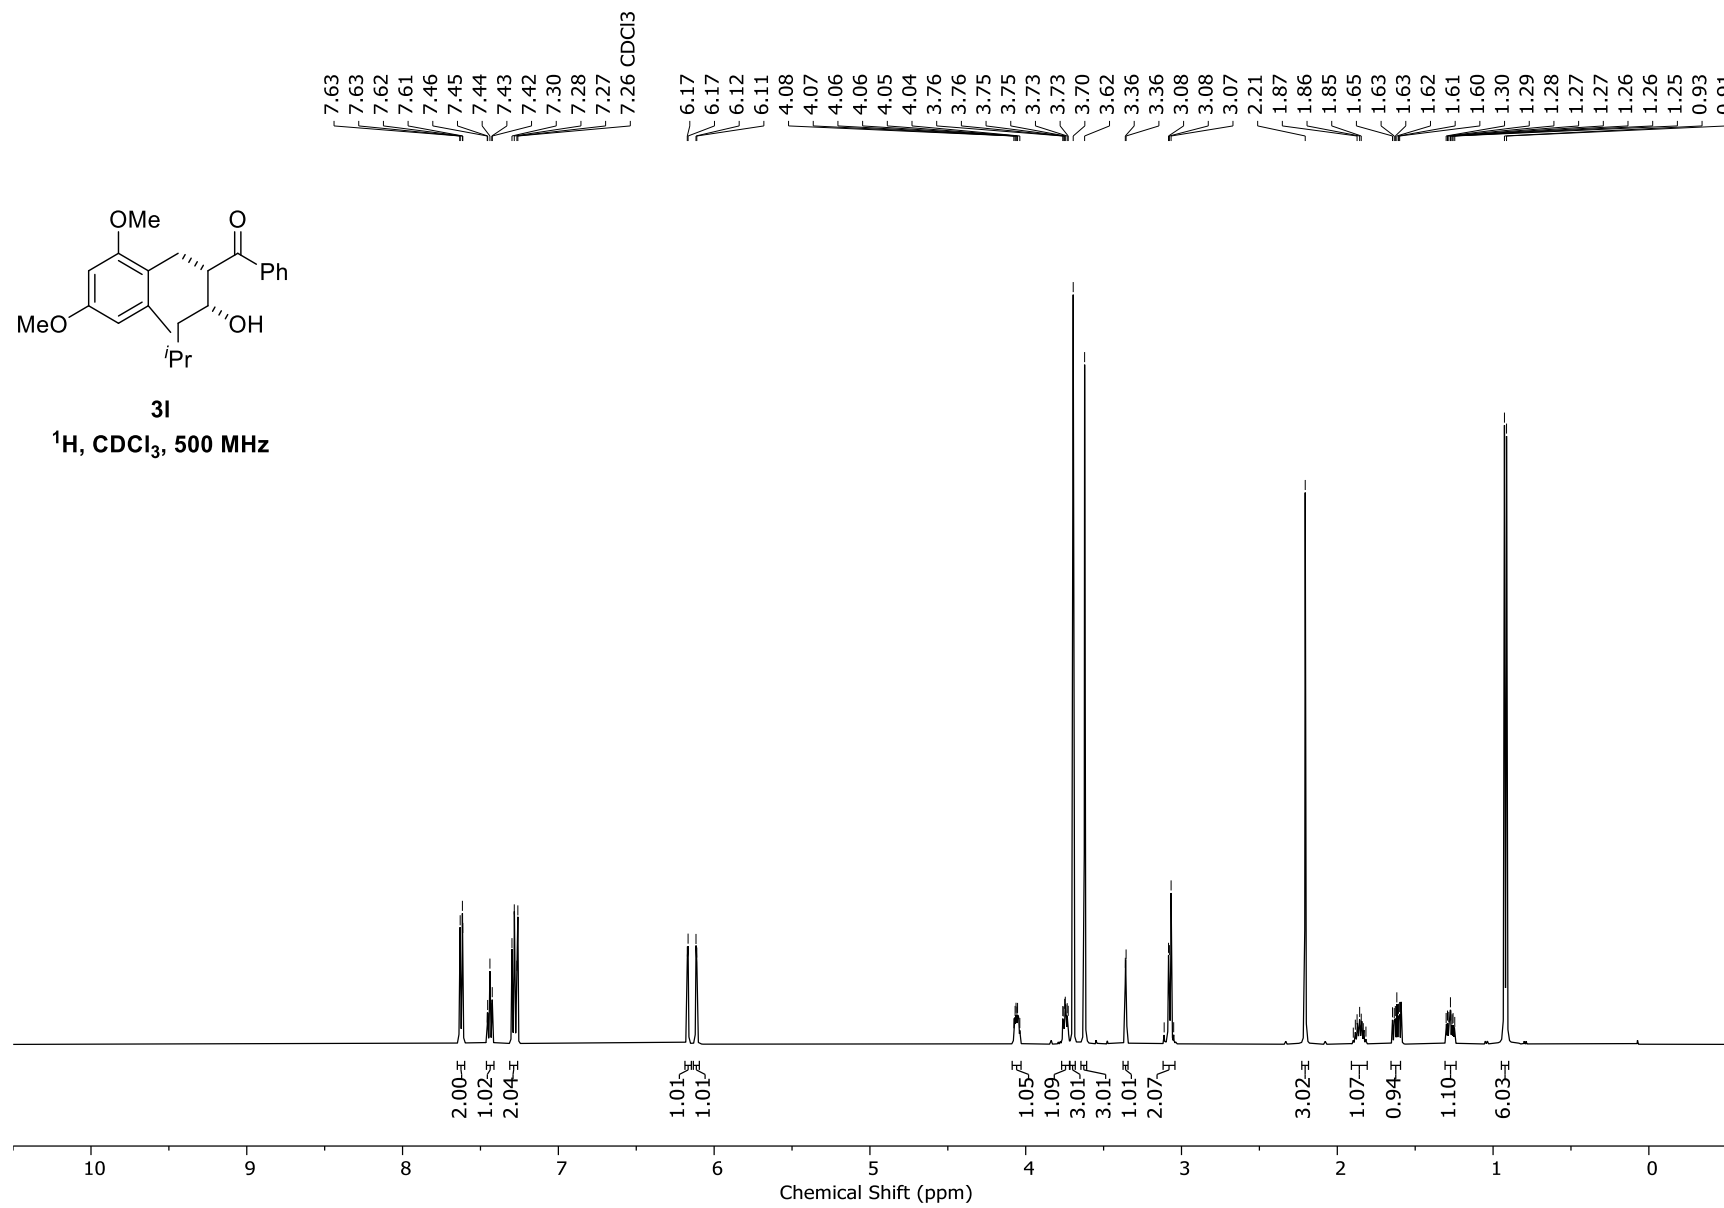

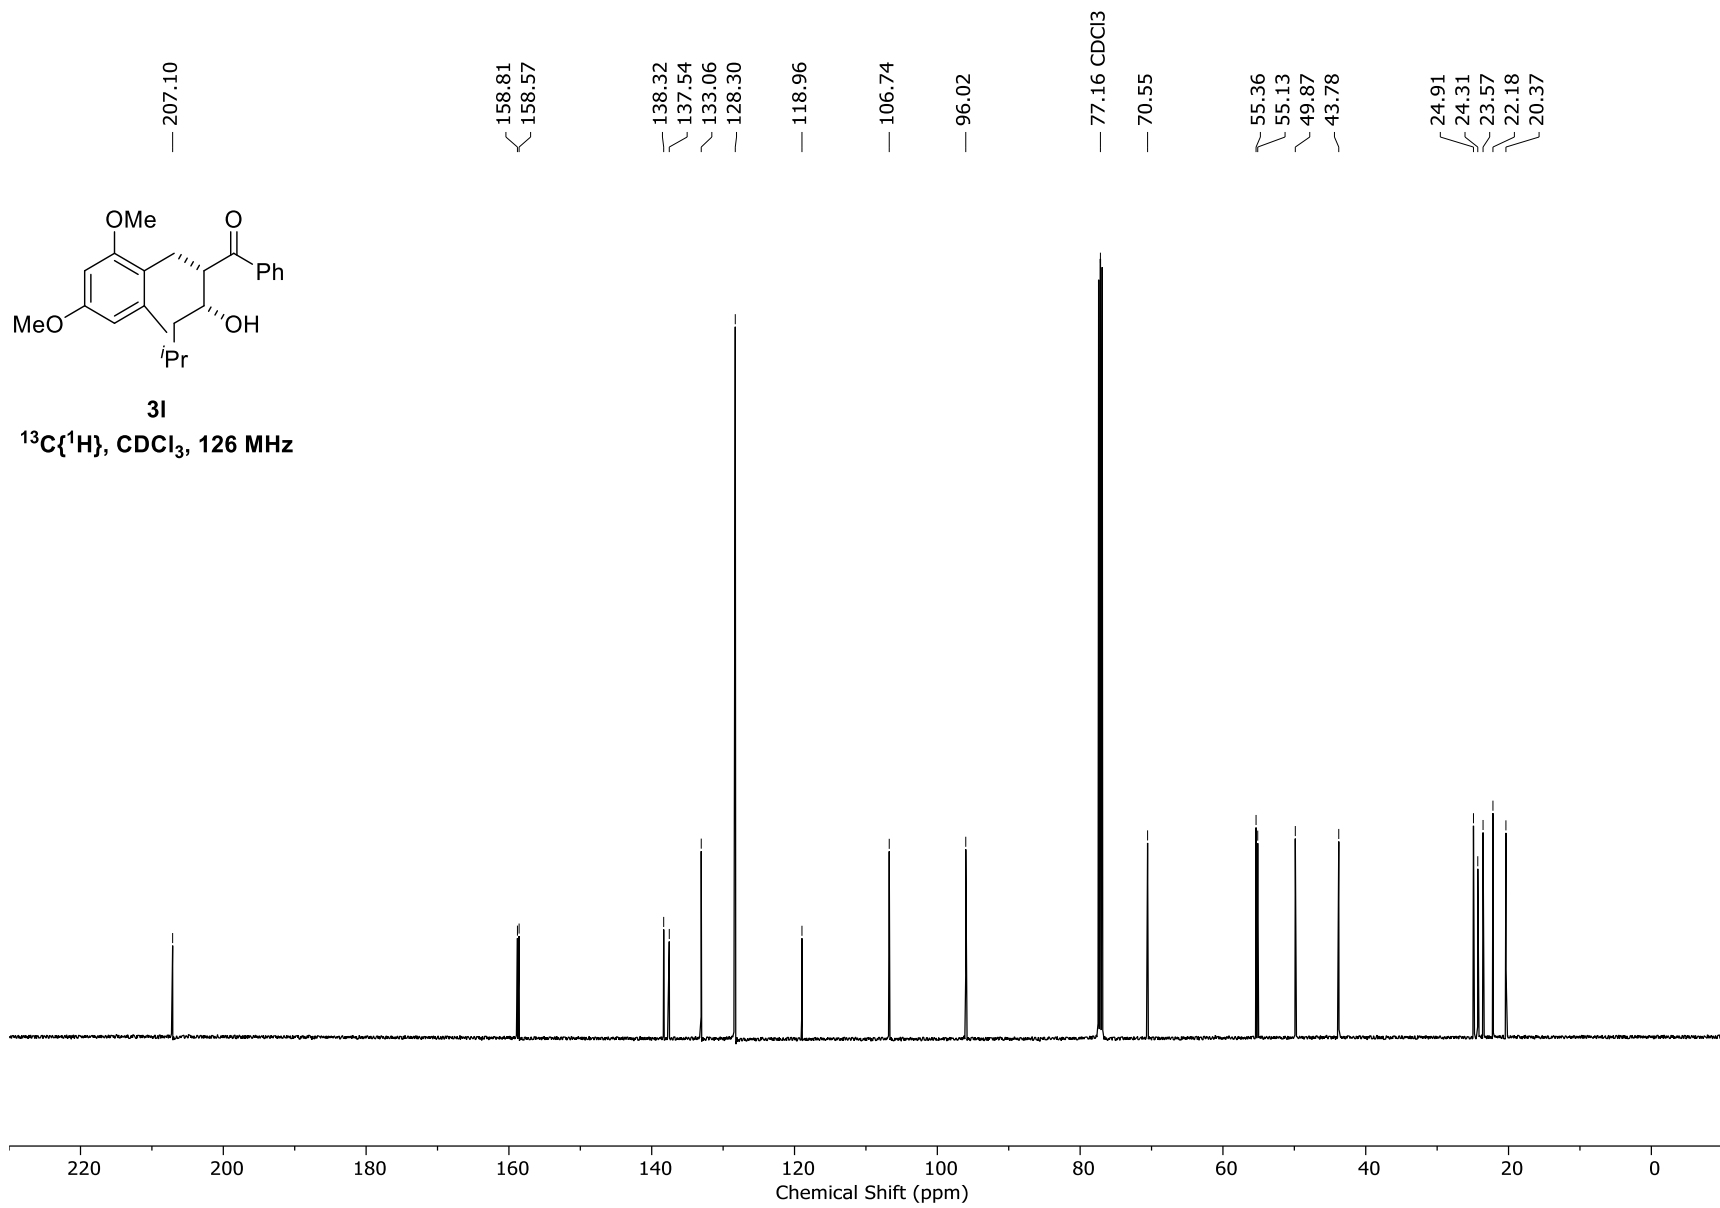

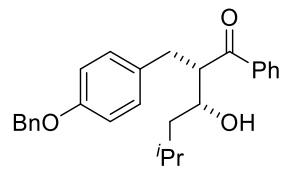

**3m**  
Crude Reaction  
<sup>1</sup>H, CDCl<sub>3</sub>, 600 MHz

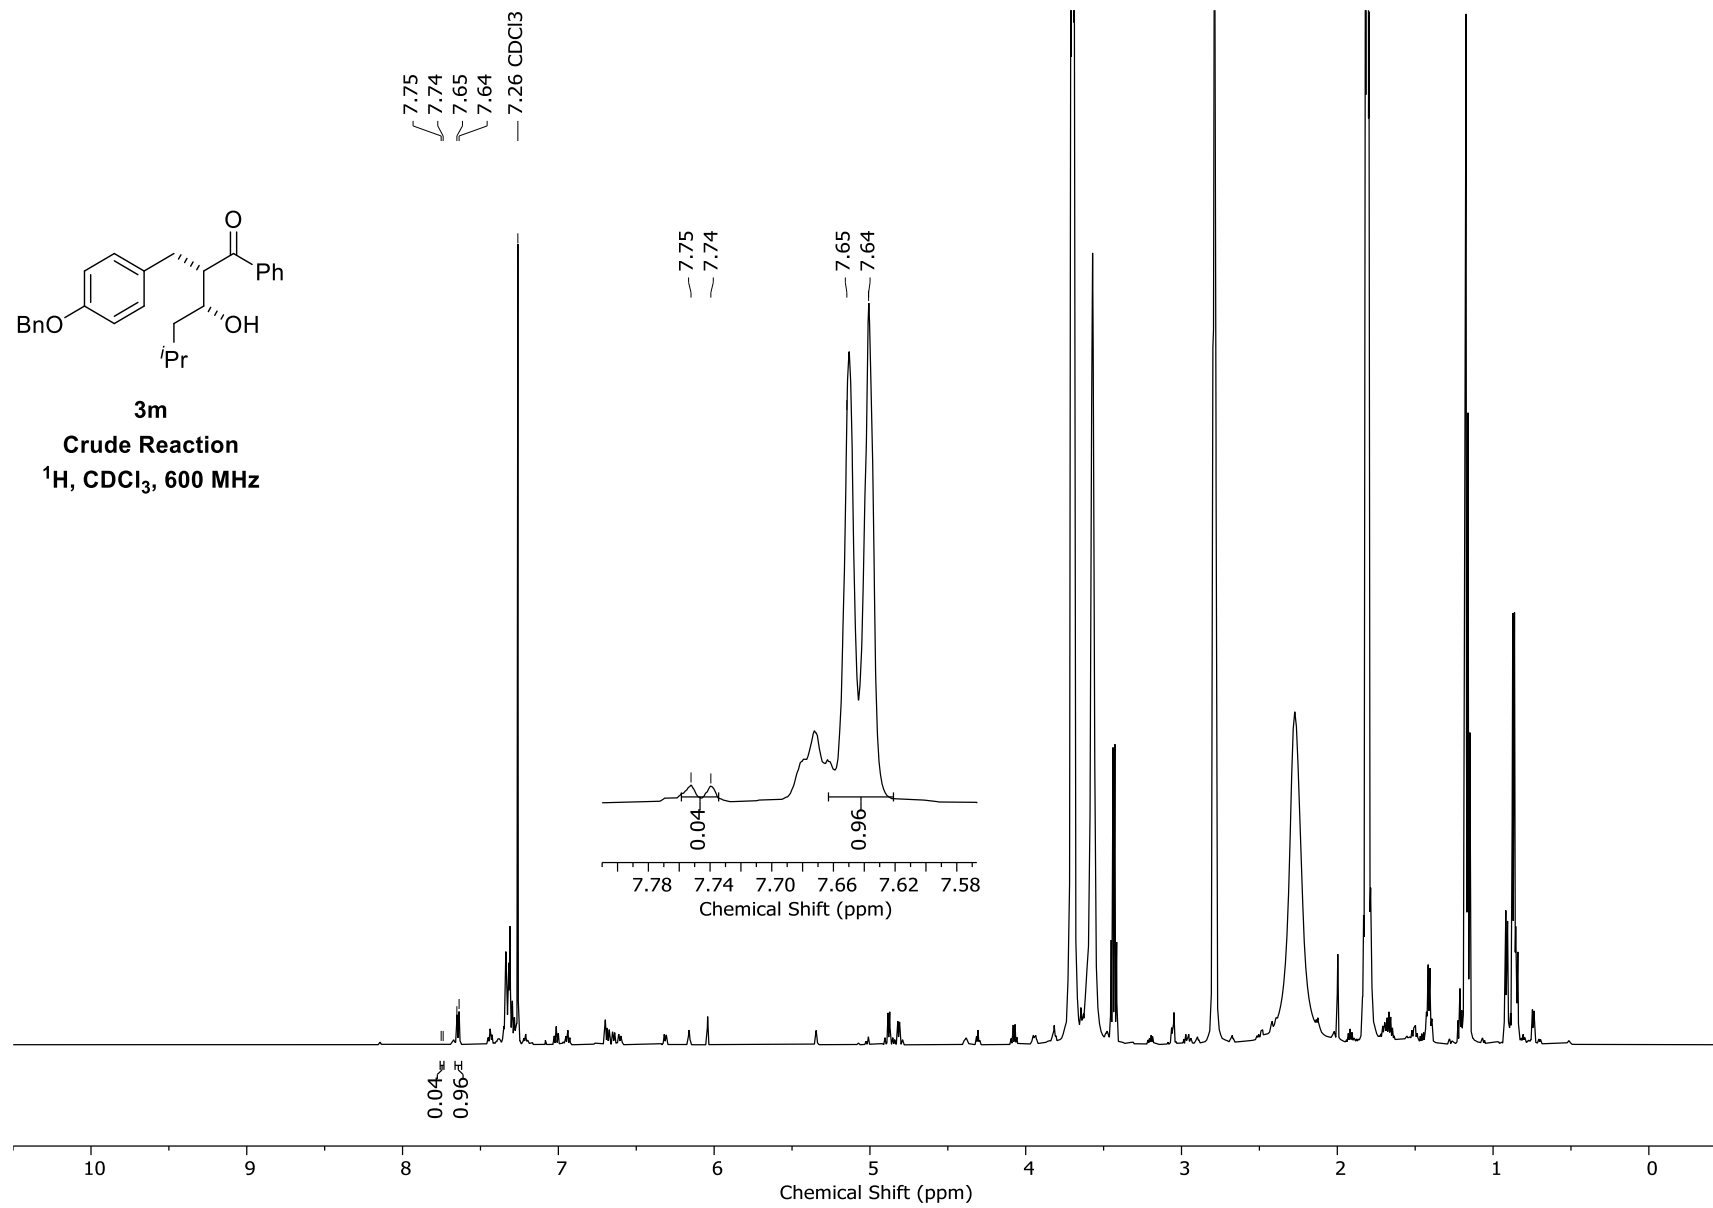

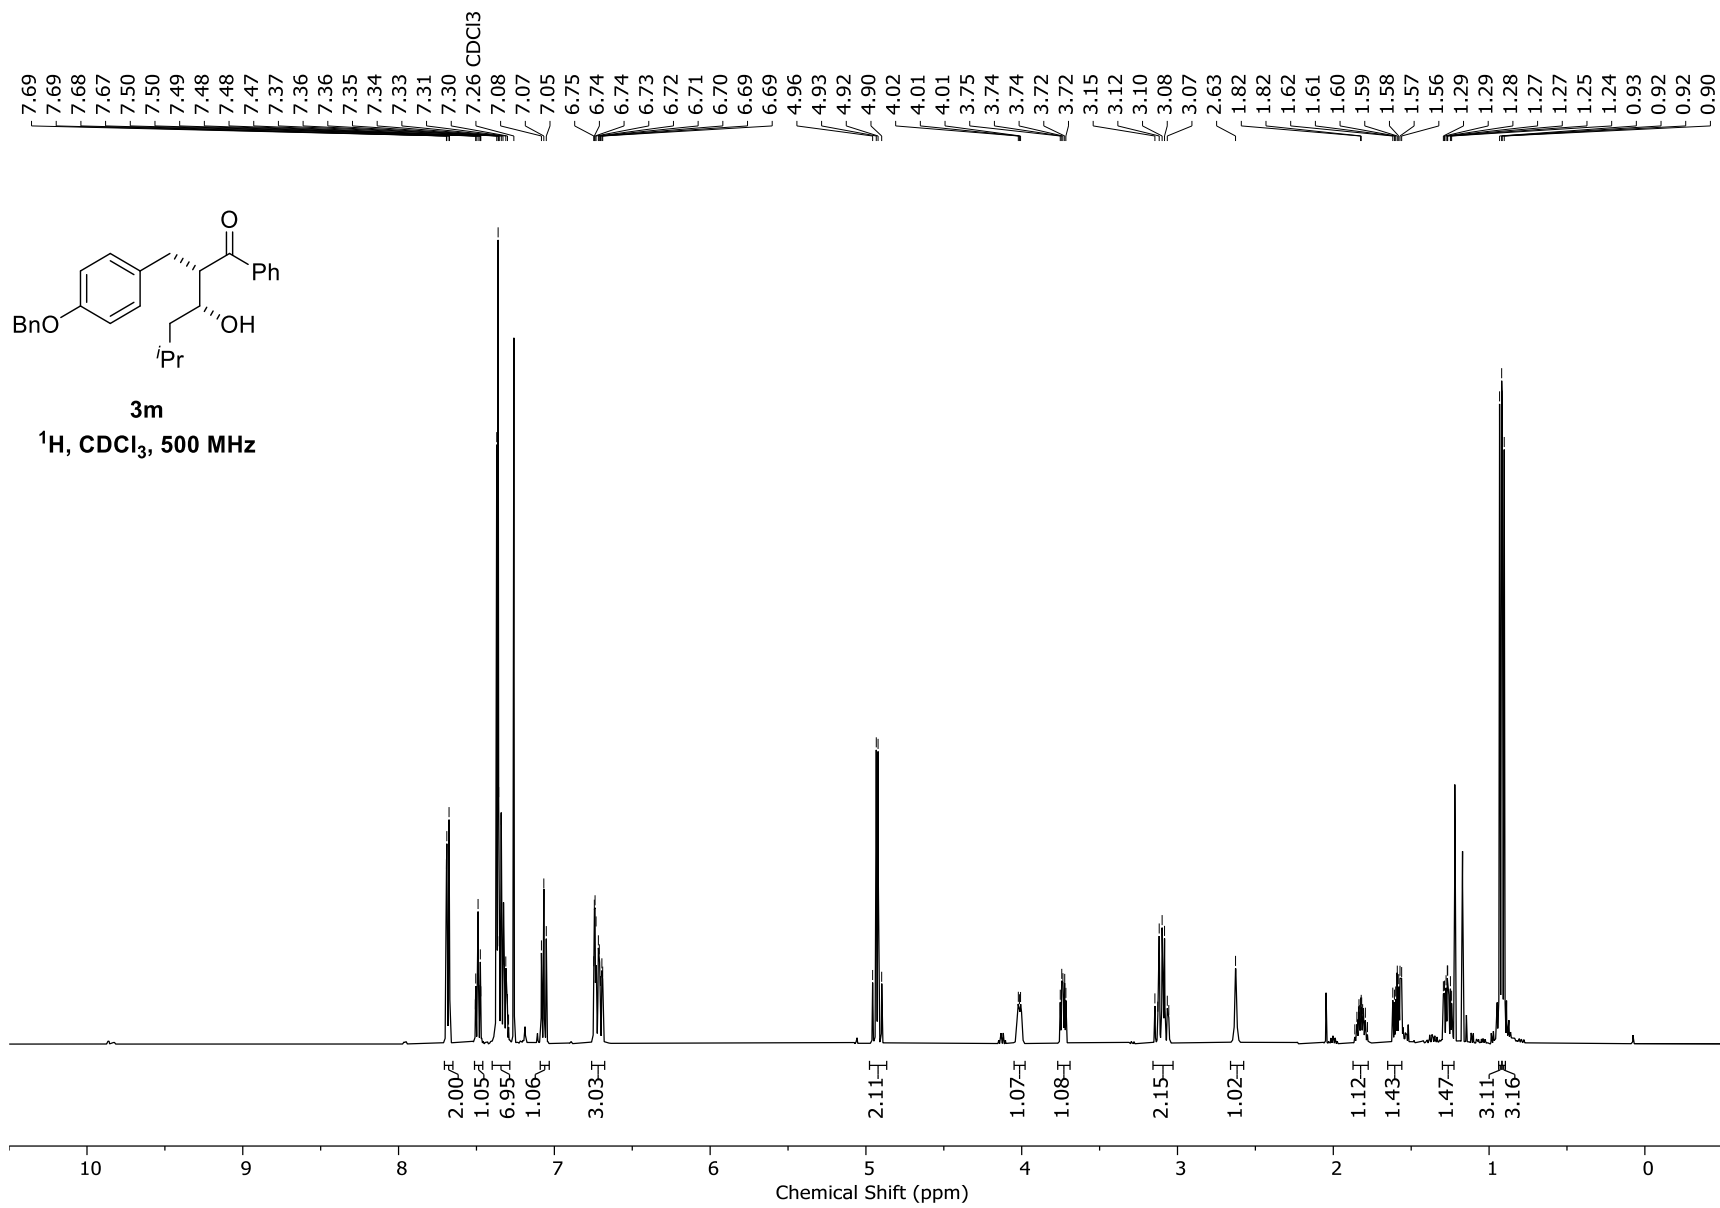

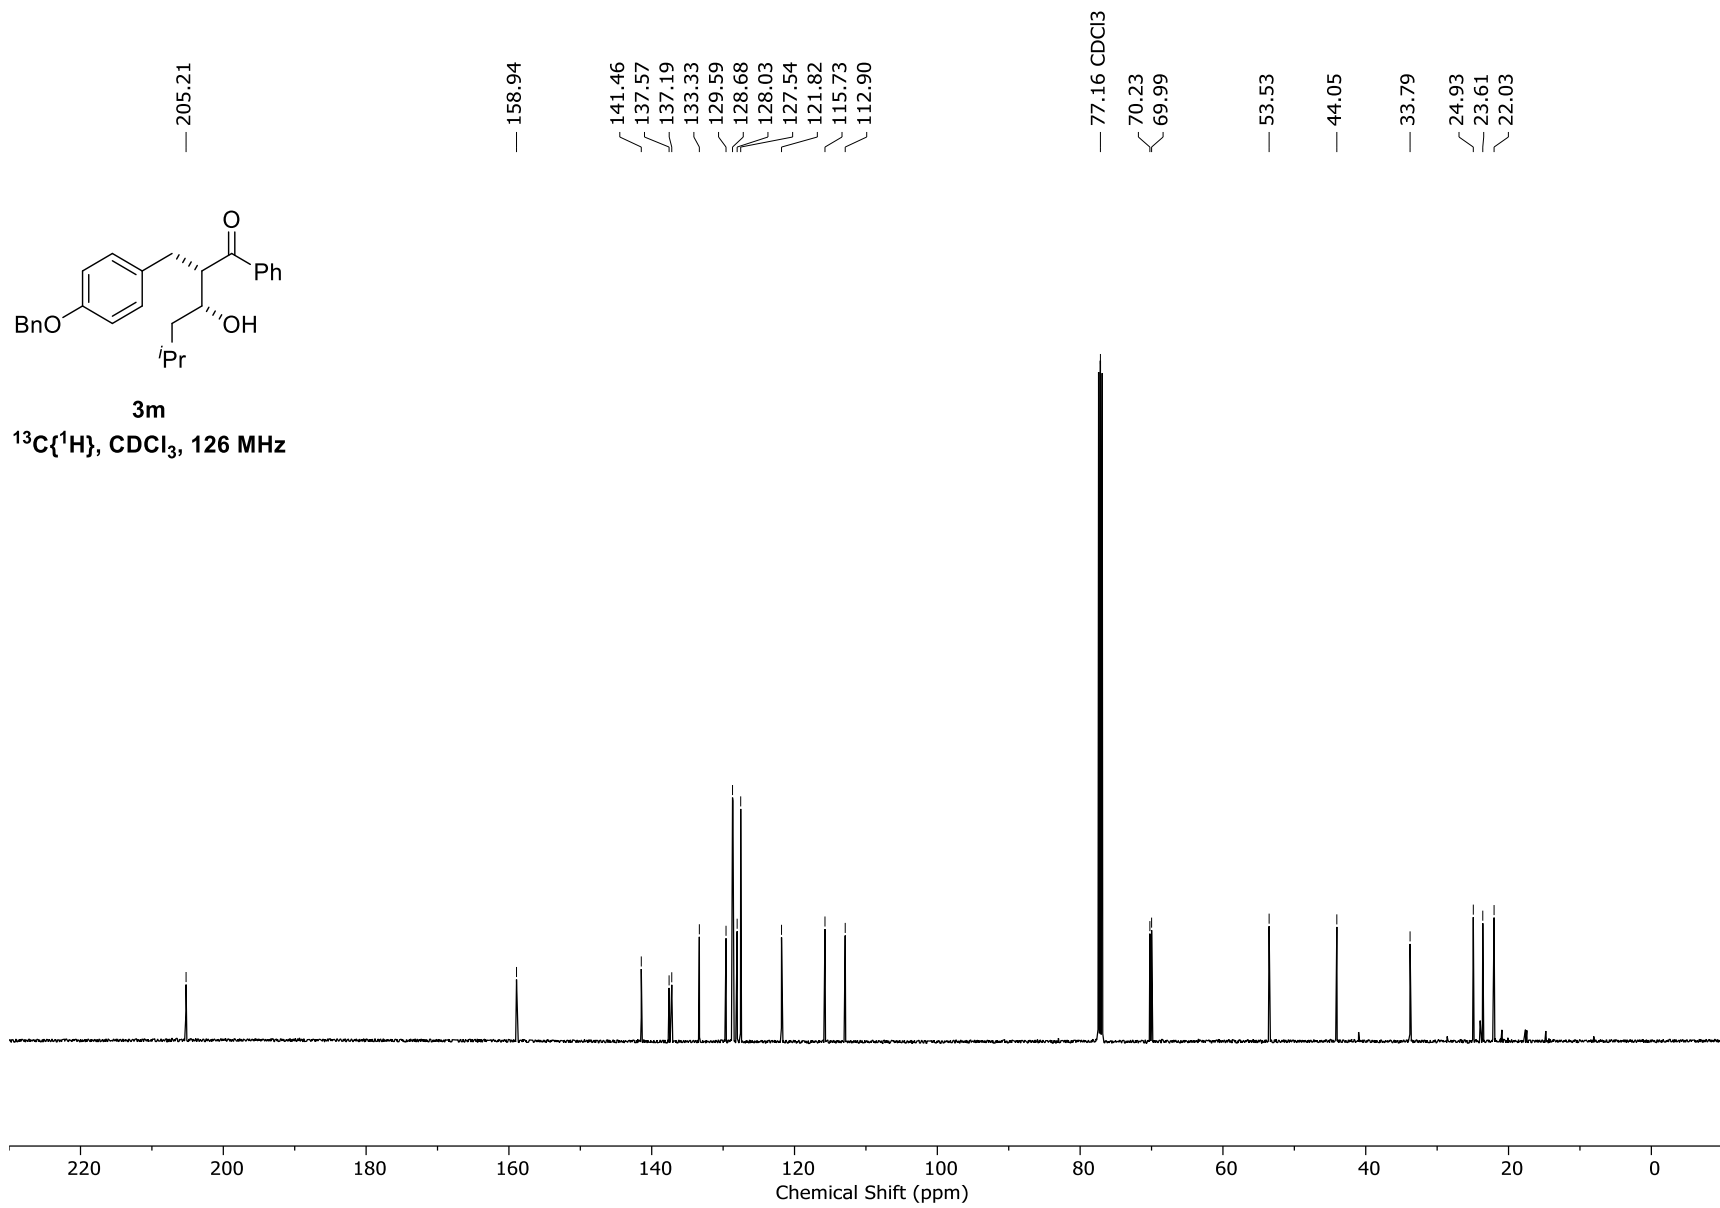

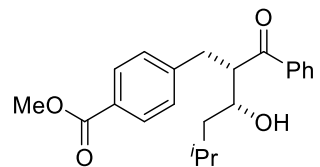

**3n**  
Crude Reaction  
 $^1\text{H}$ ,  $\text{CDCl}_3$ , 400 MHz

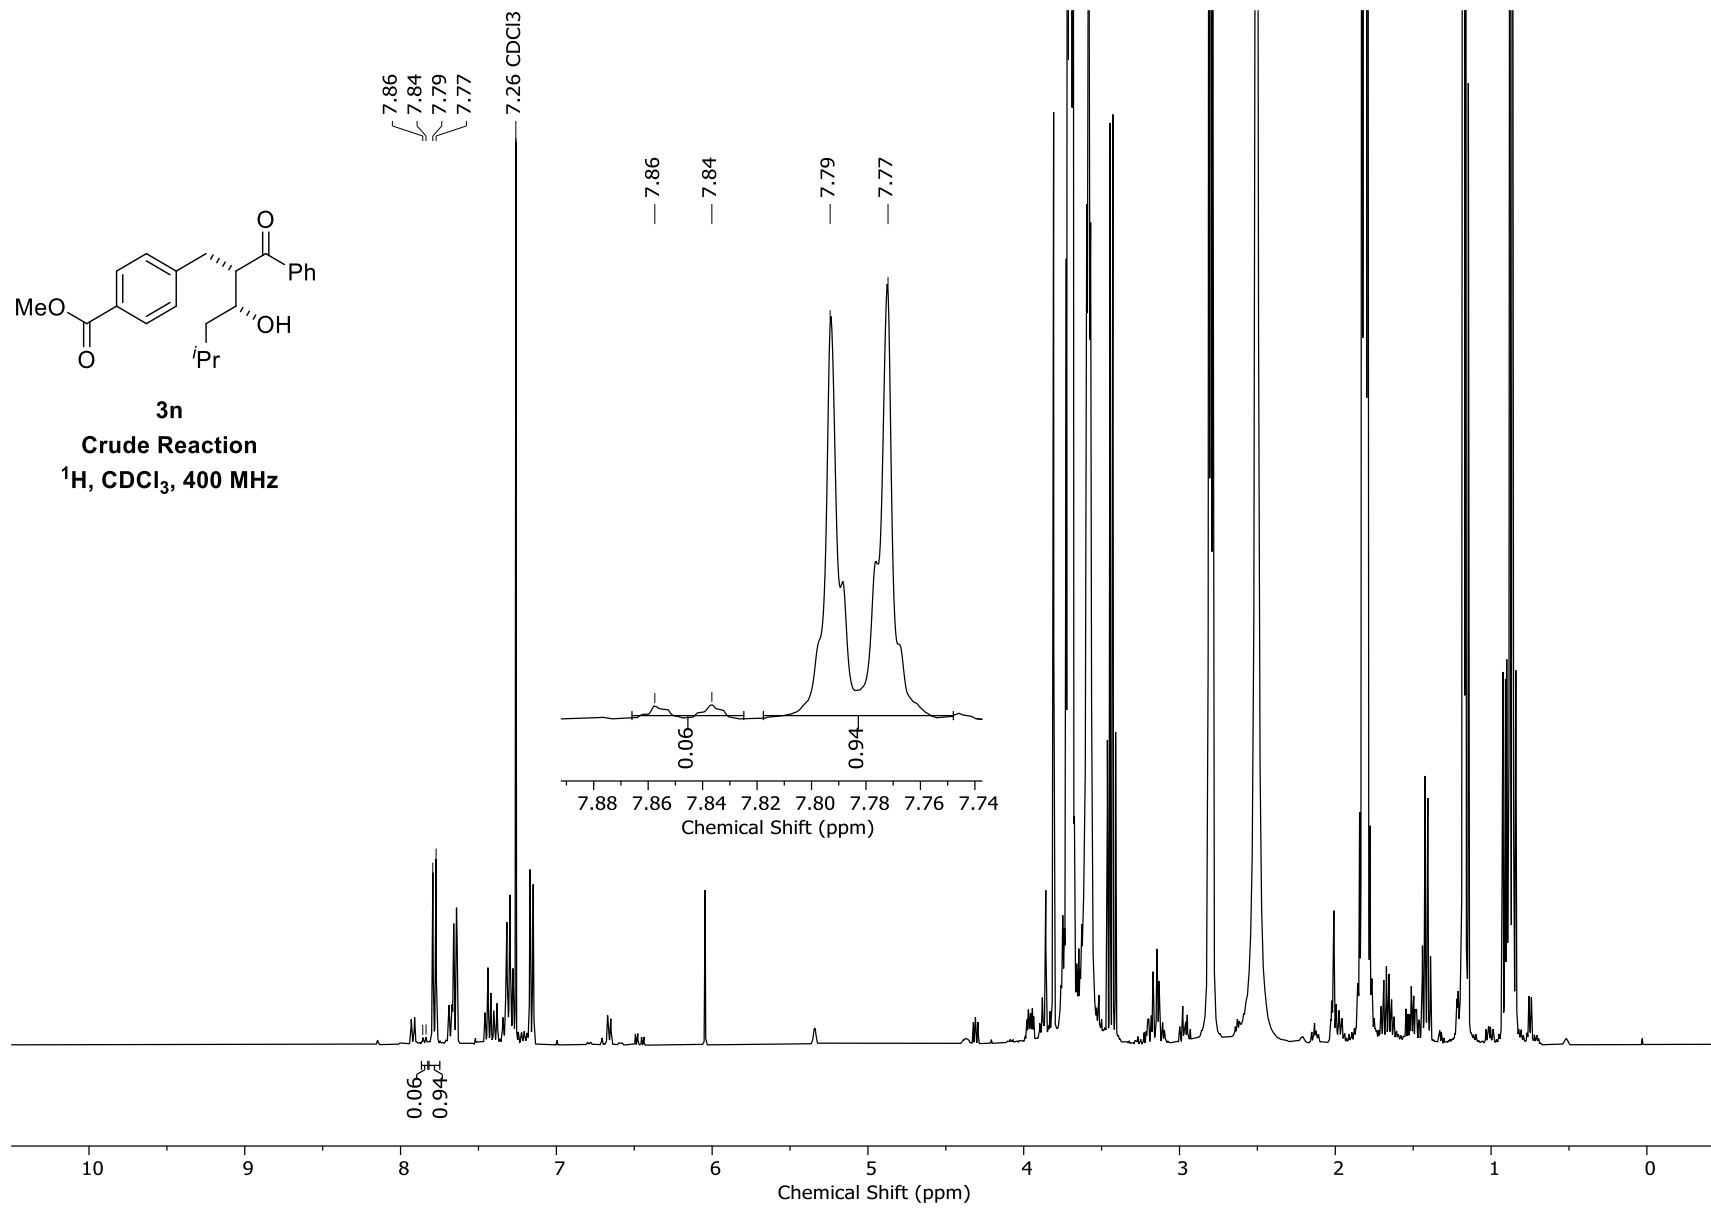

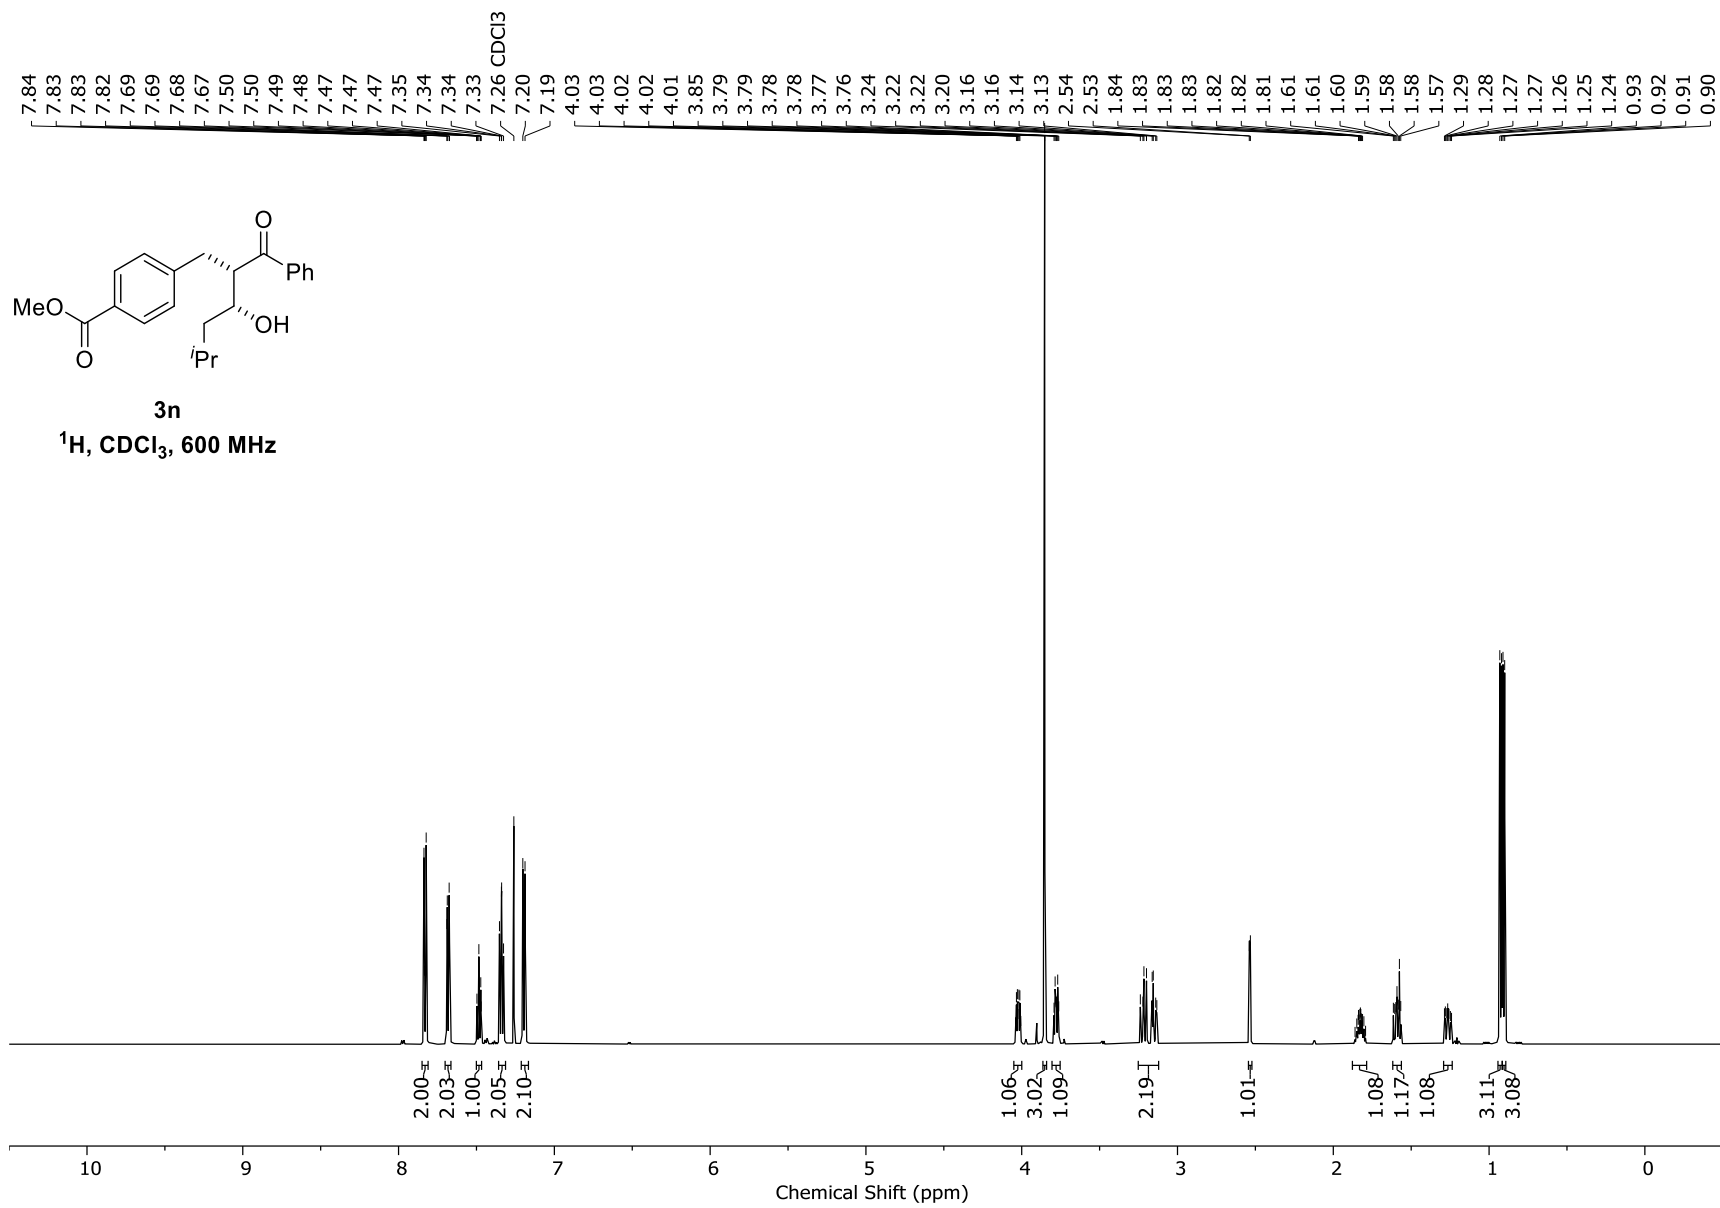

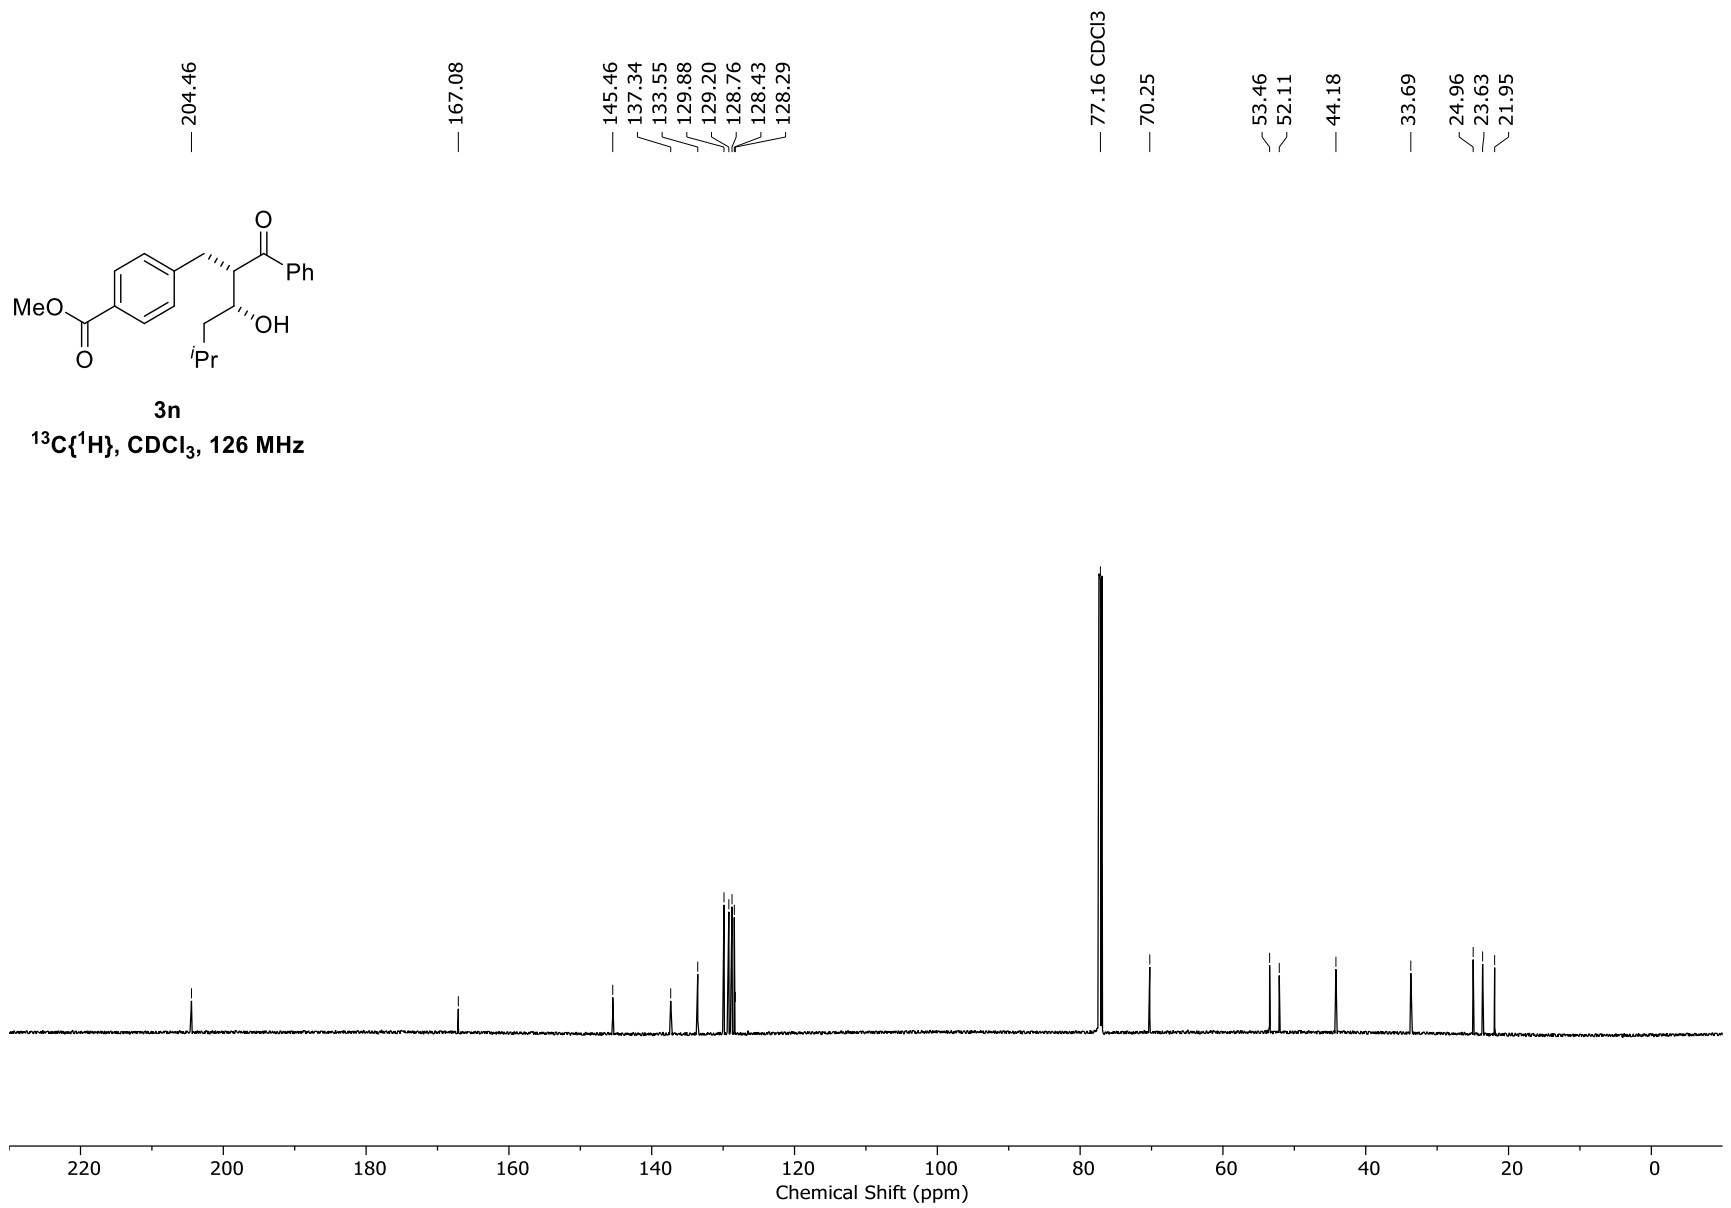

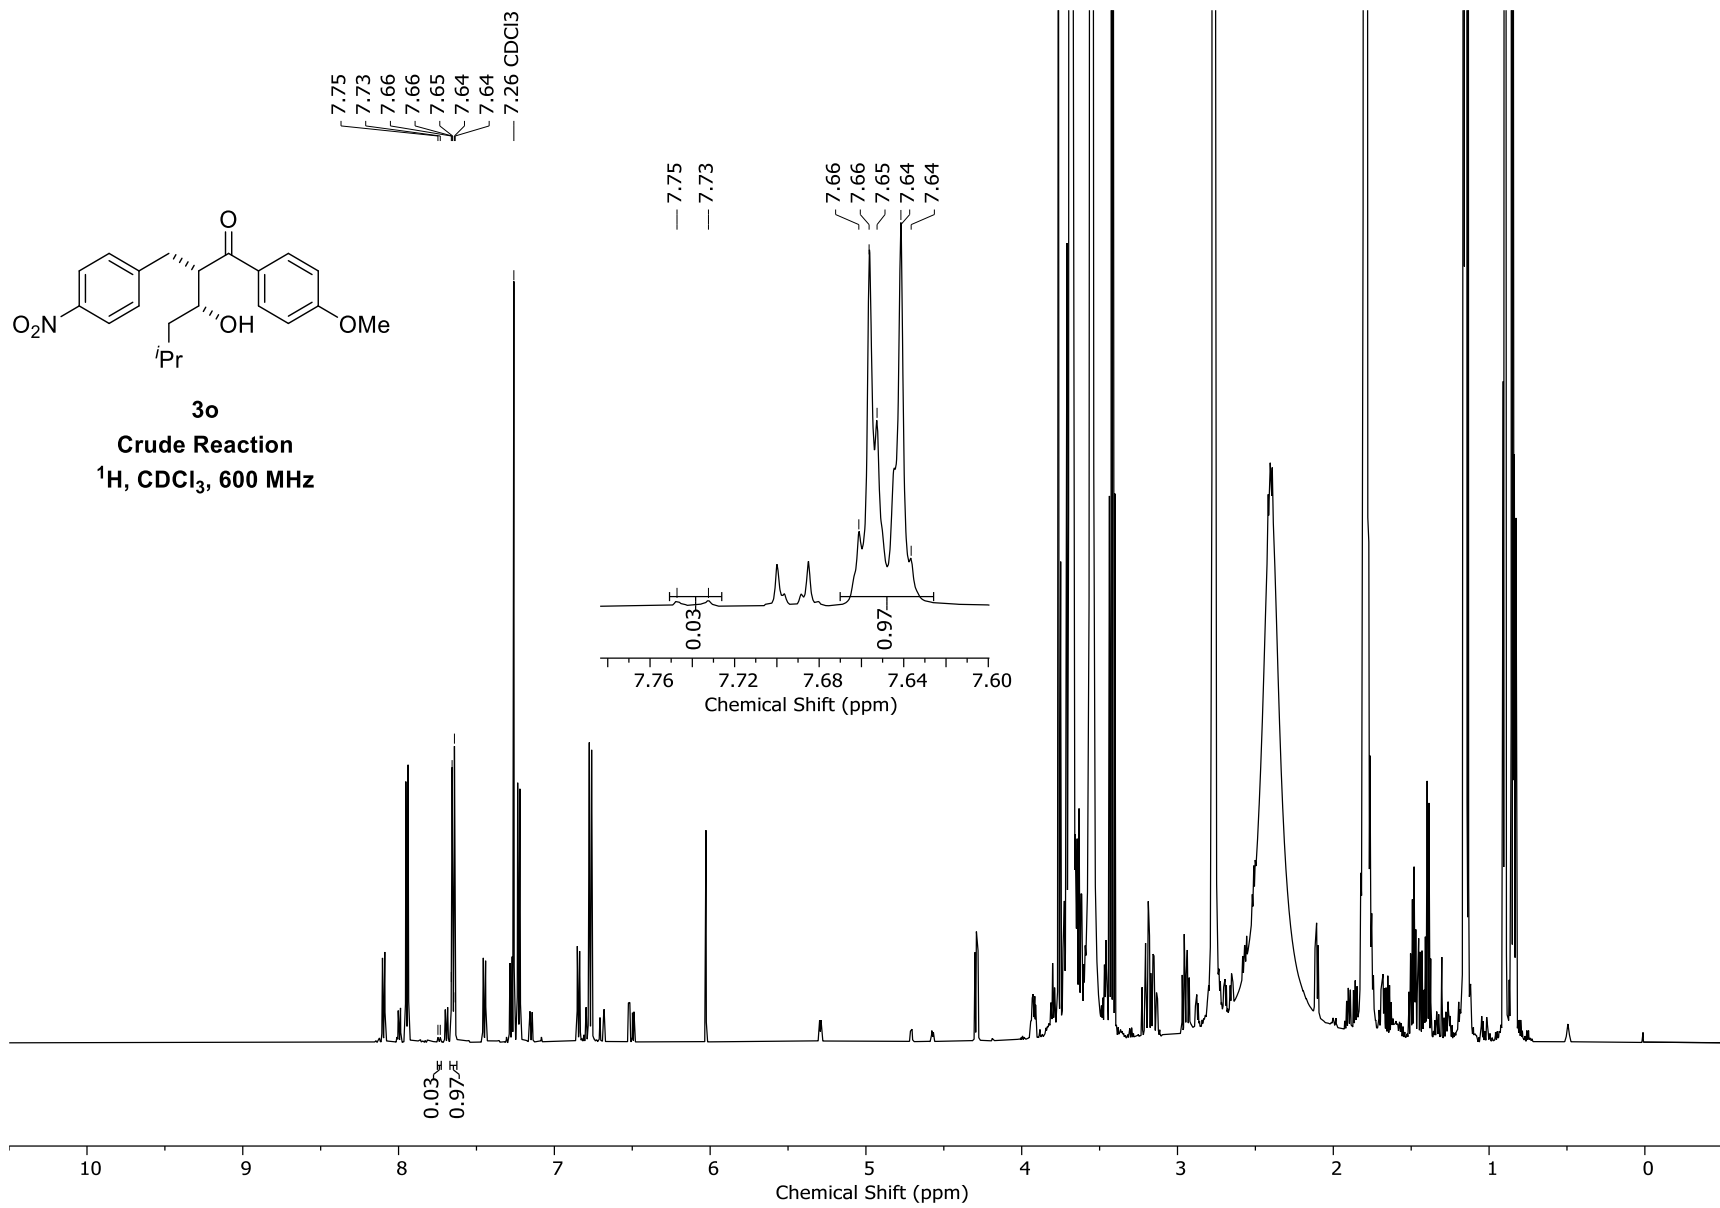

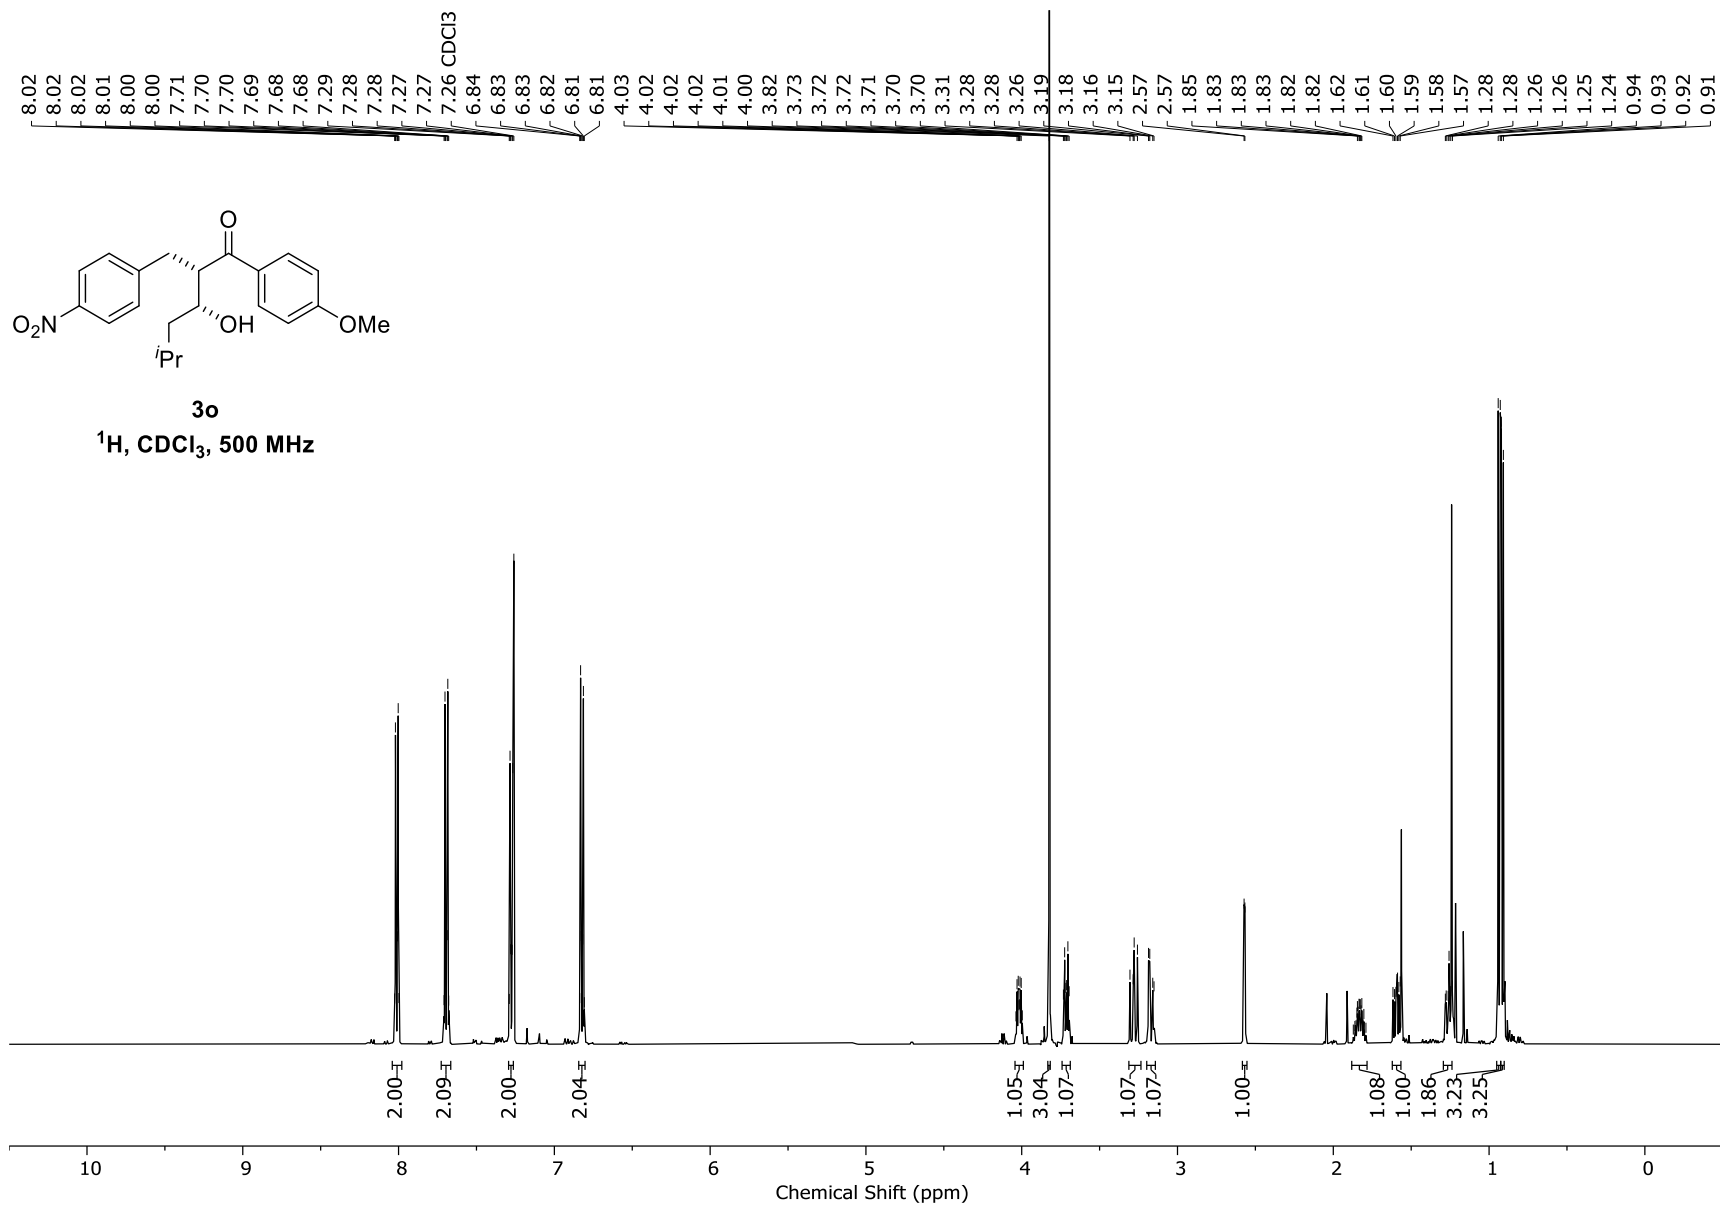

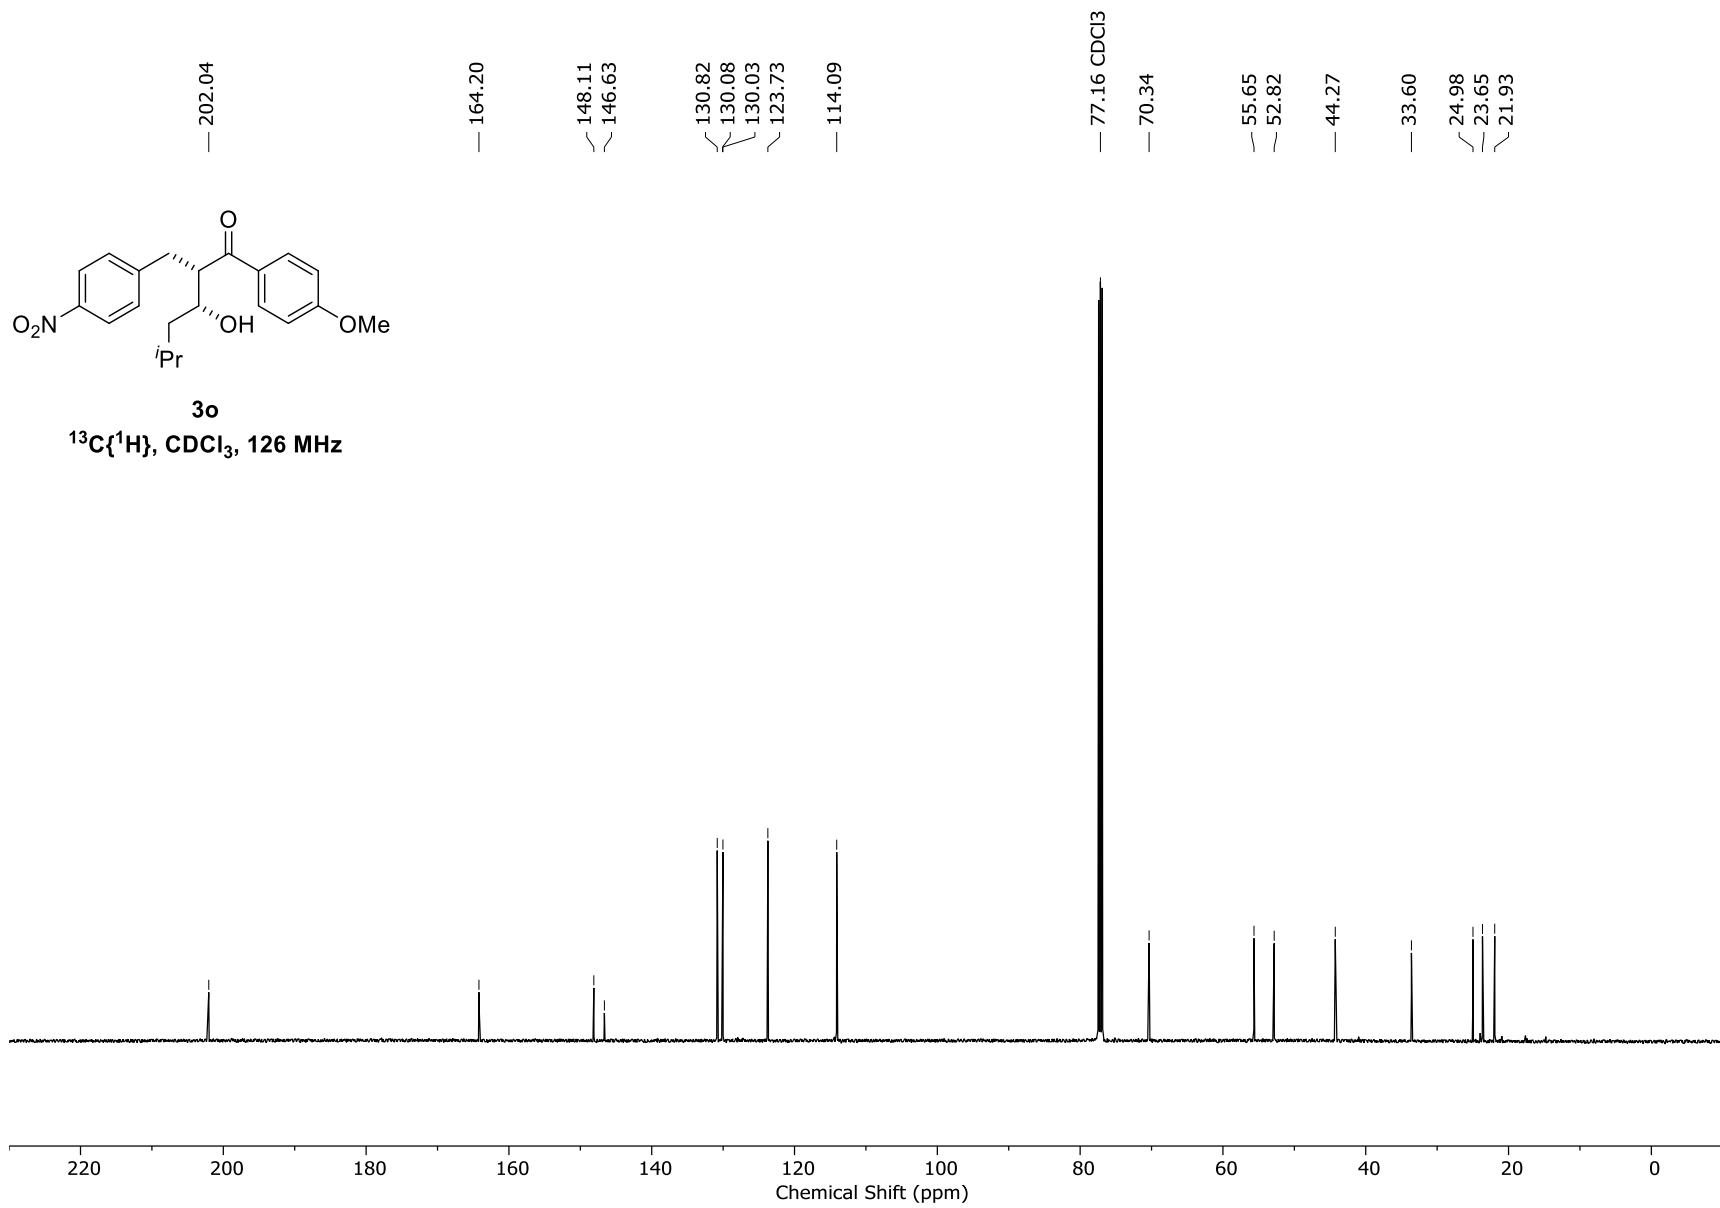

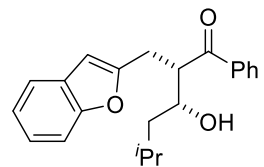

**3p**  
Crude Reaction  
 $^1\text{H}$ ,  $\text{CDCl}_3$ , 400 MHz

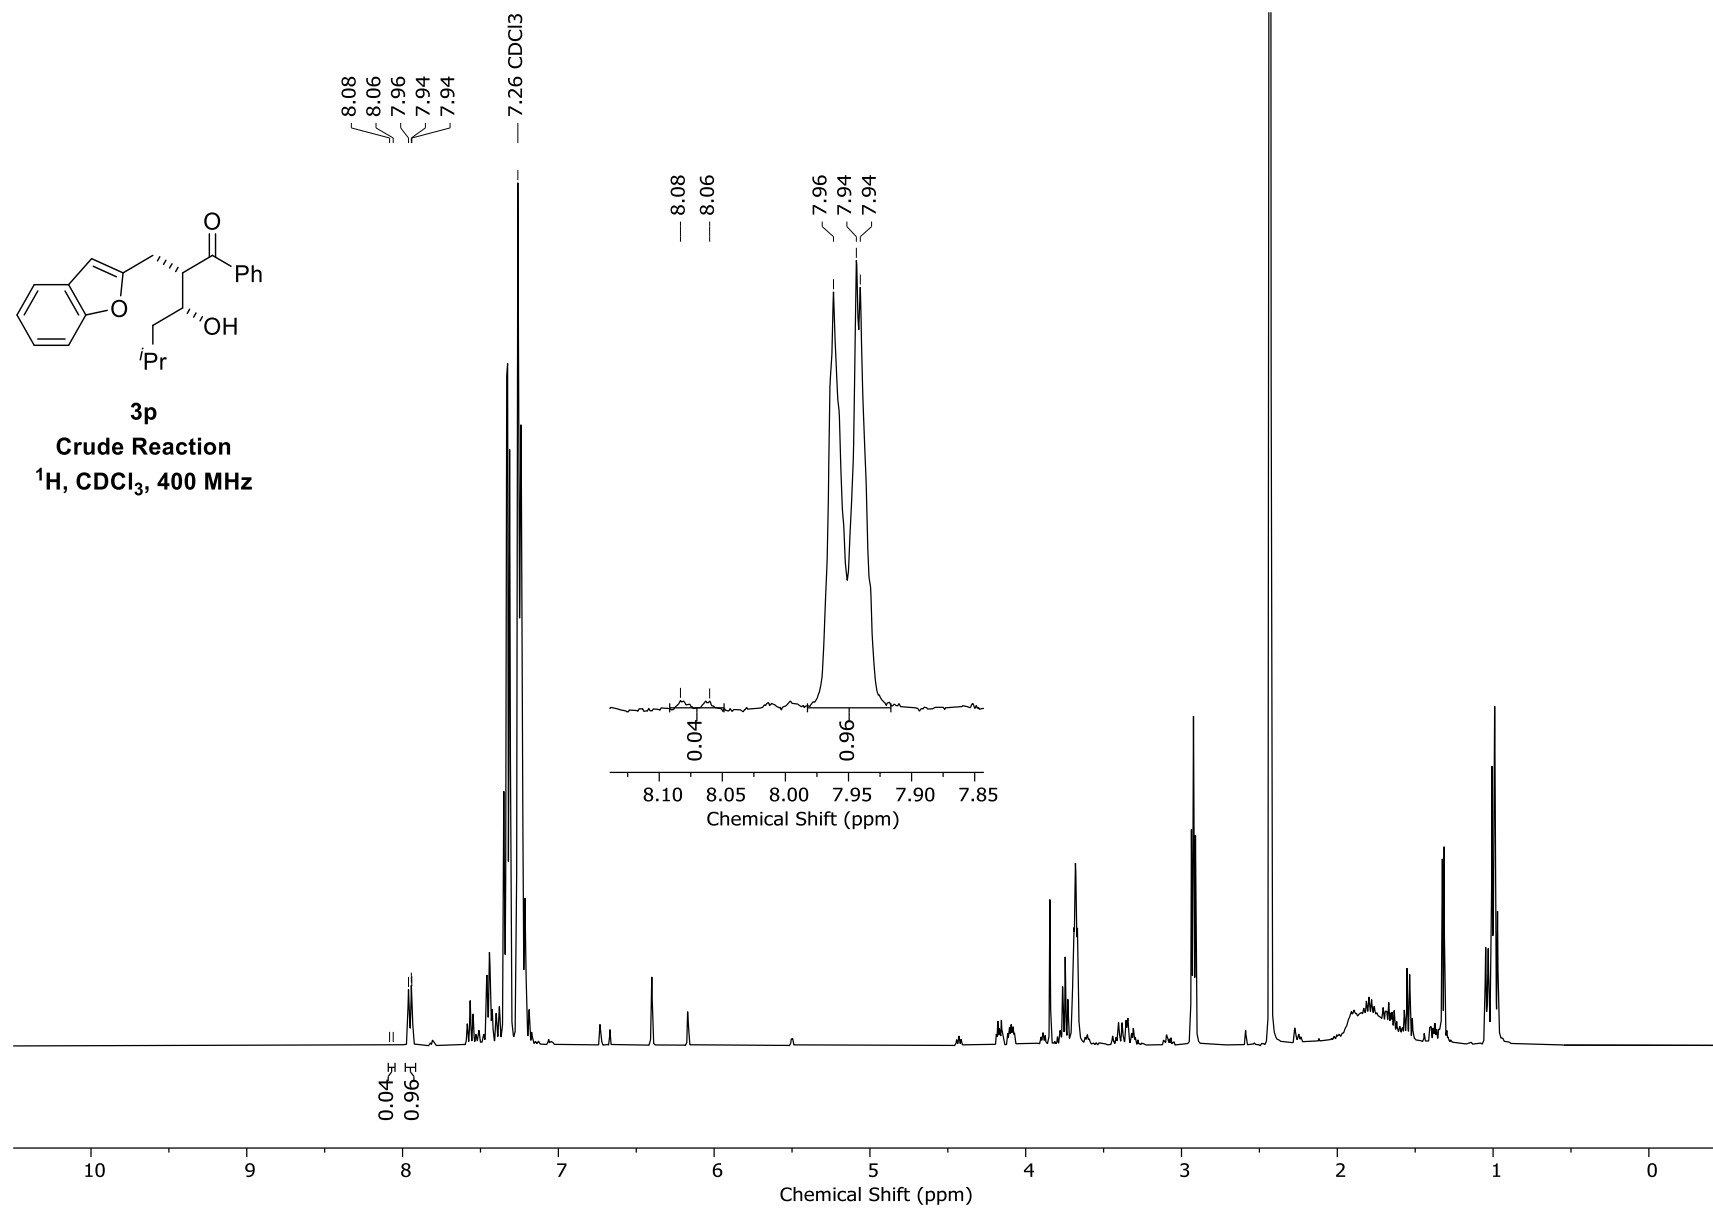

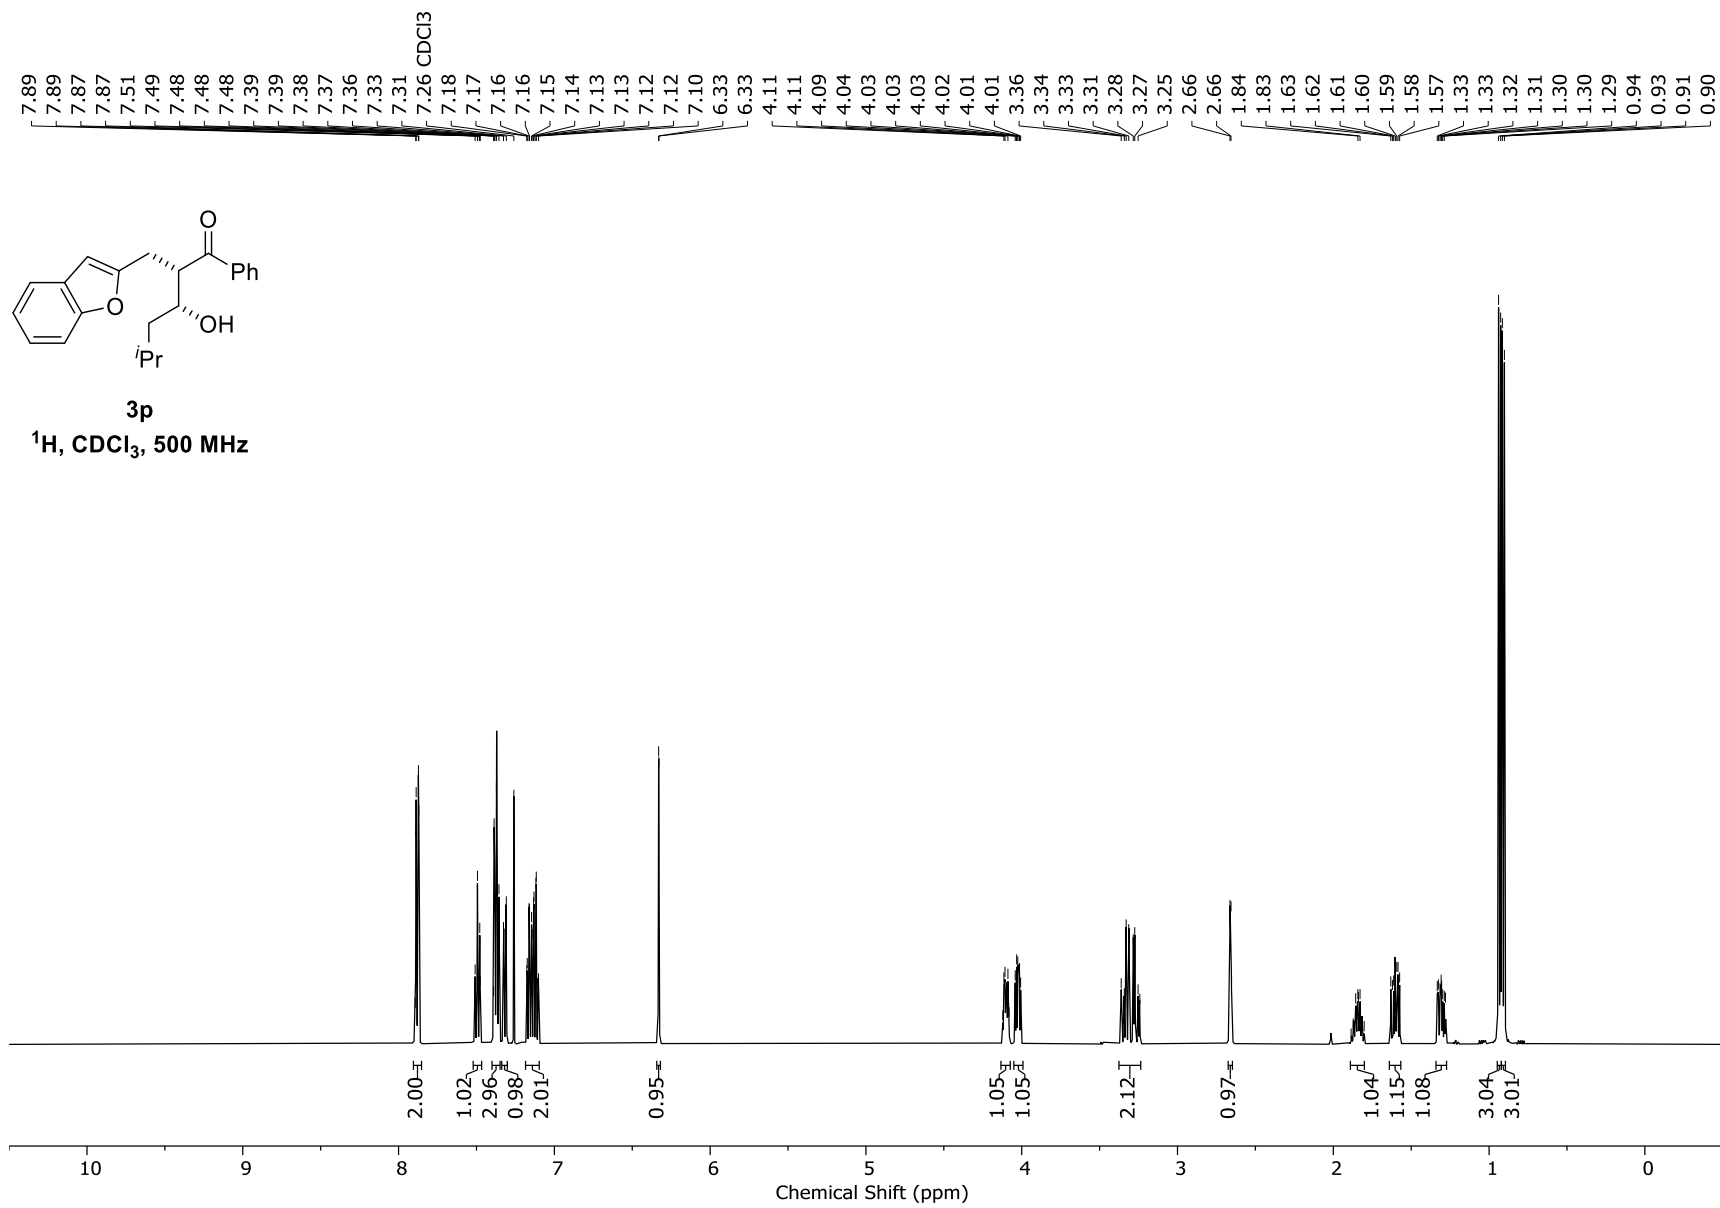

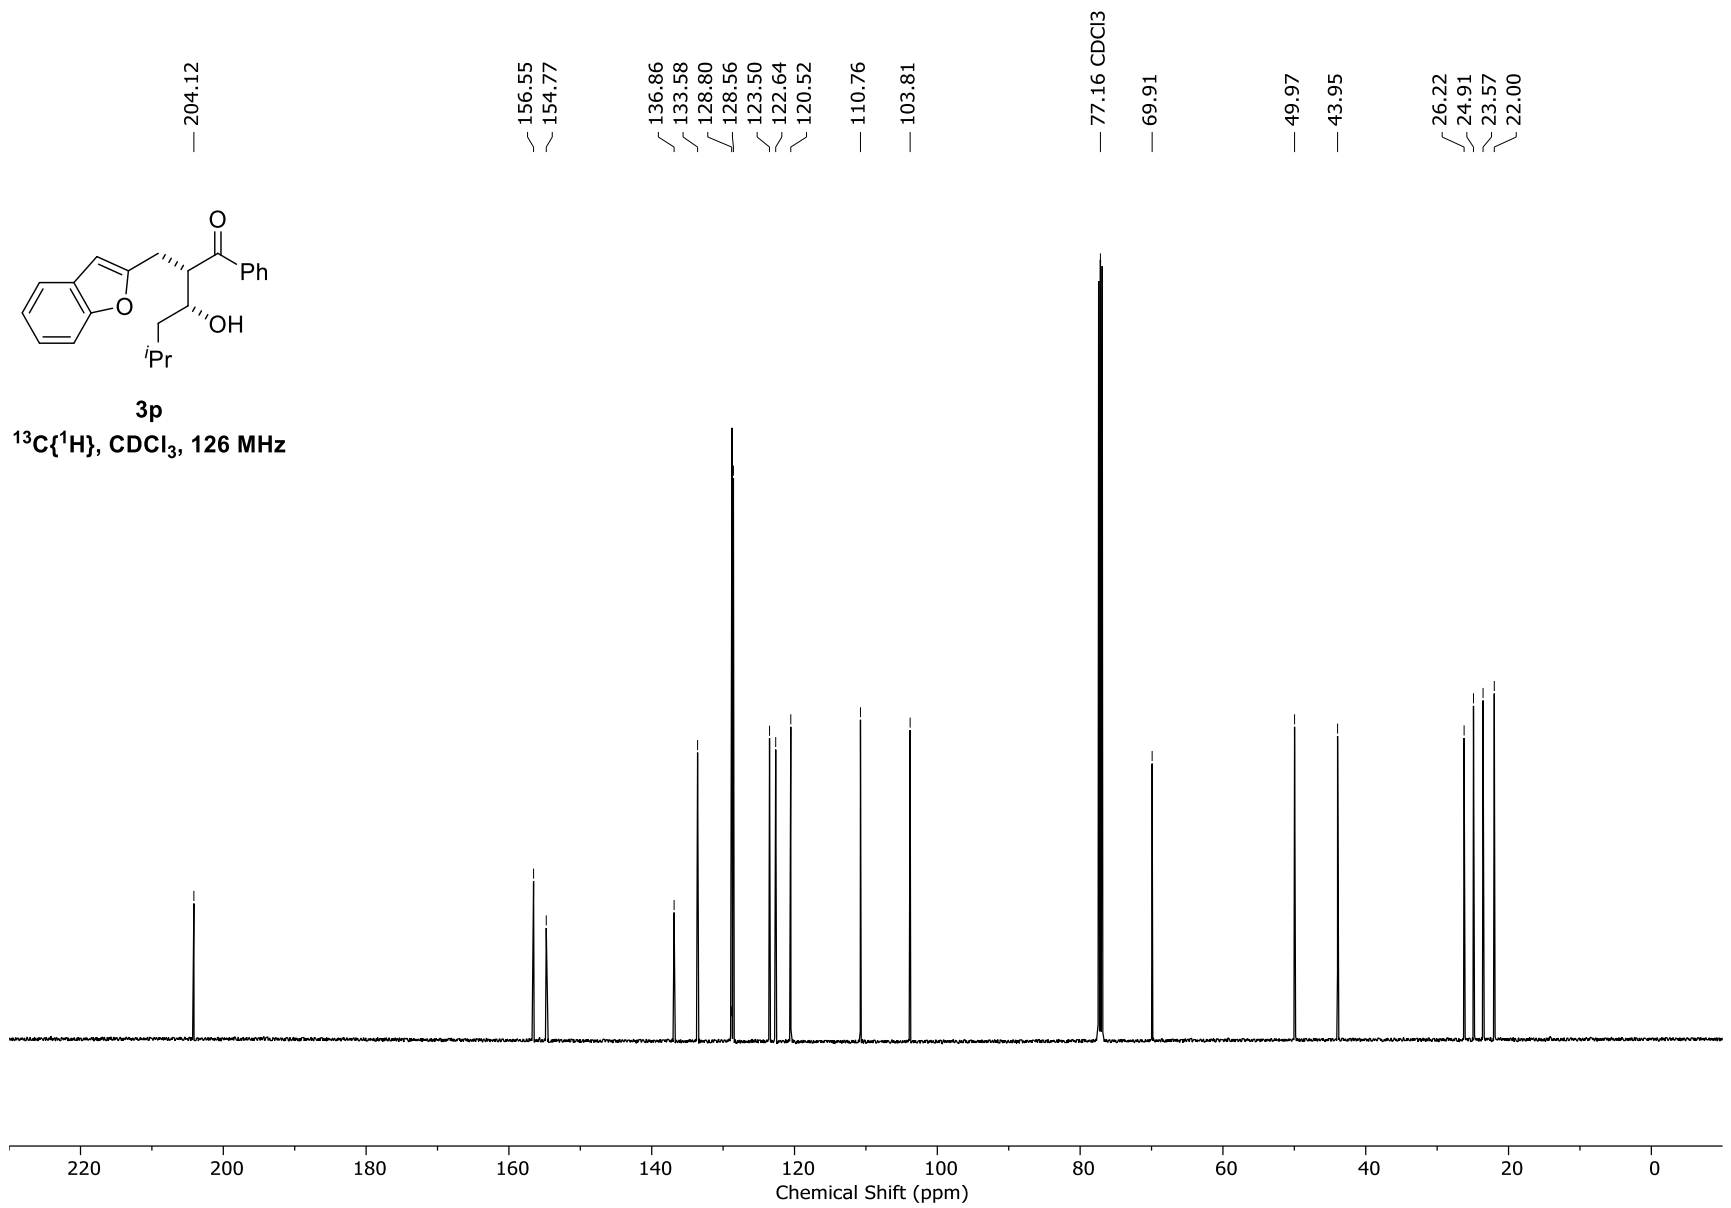

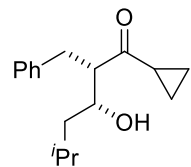

**3q**  
Crude Reaction  
 $^1\text{H}$ ,  $\text{CDCl}_3$ , 400 MHz

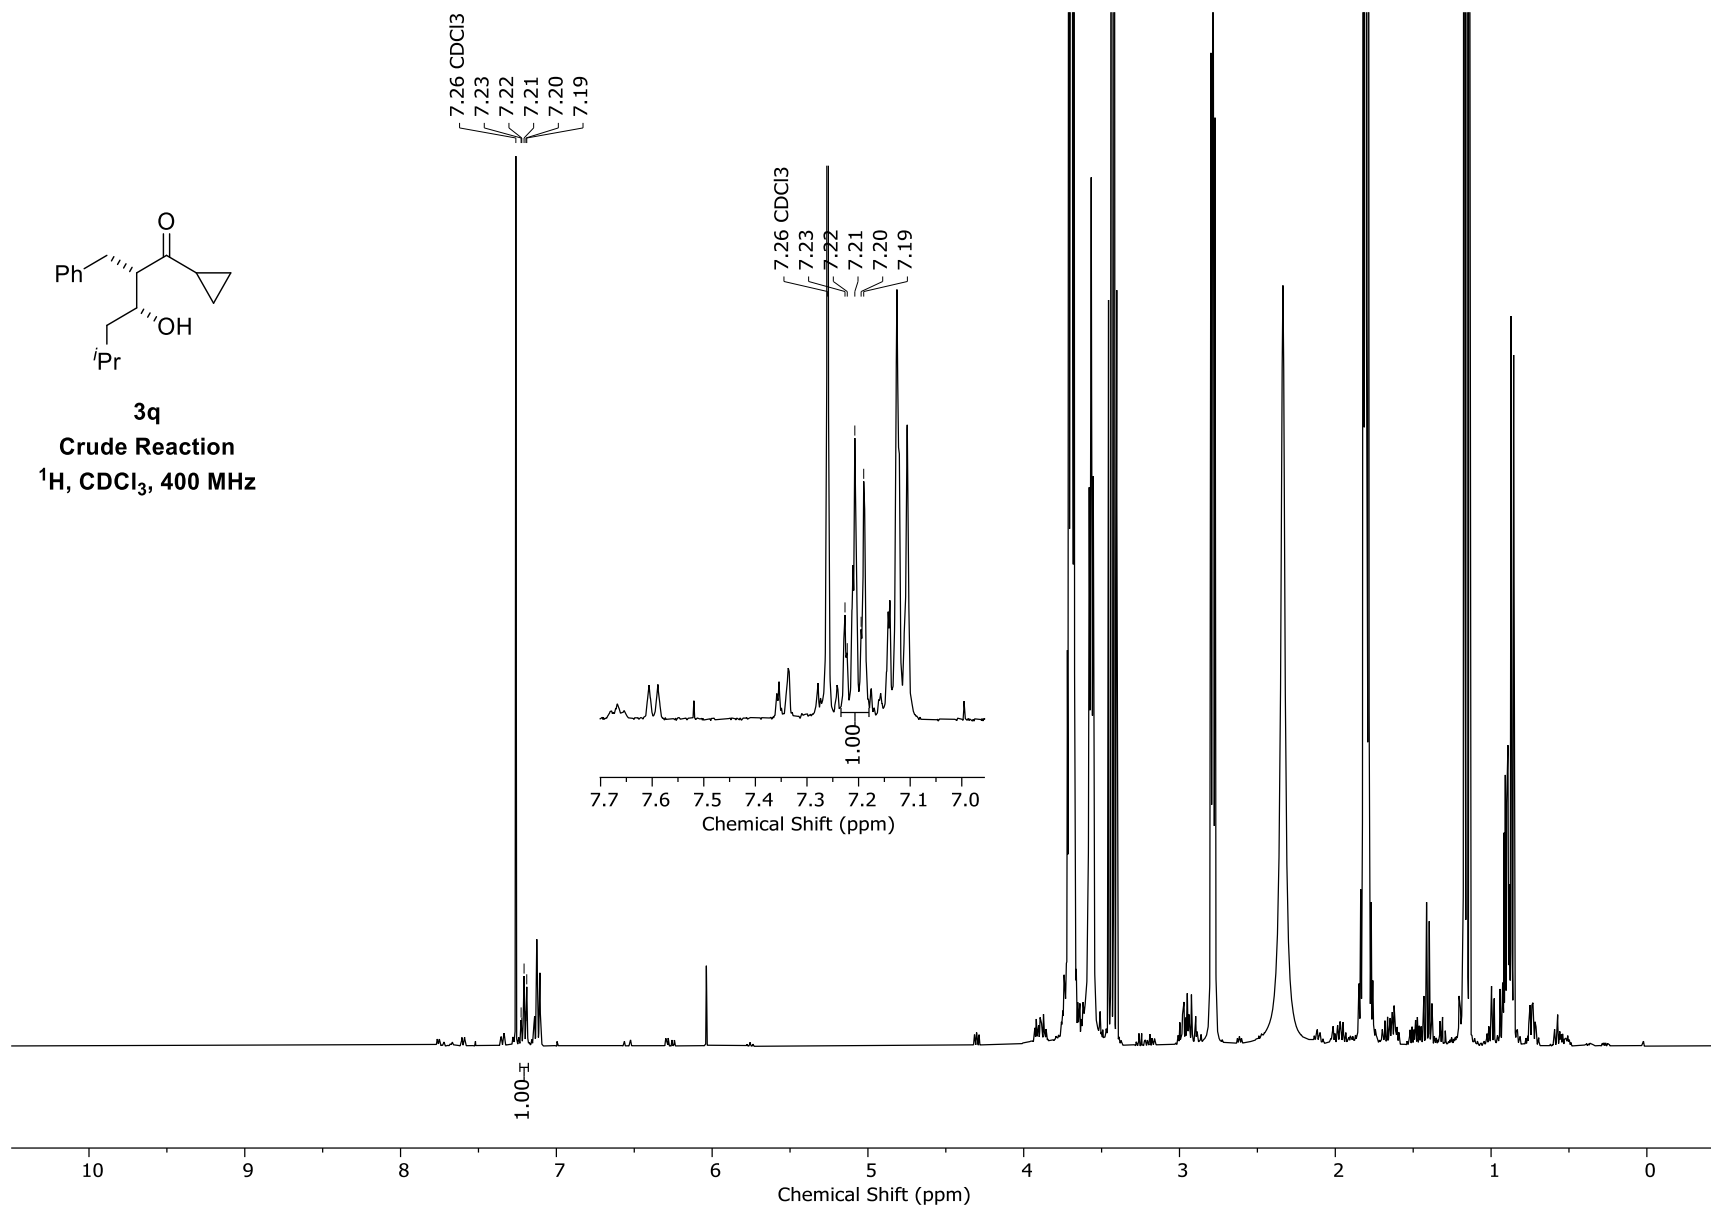

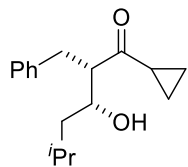

**3q**  
 $^1\text{H}$ ,  $\text{CDCl}_3$ , 500 MHz

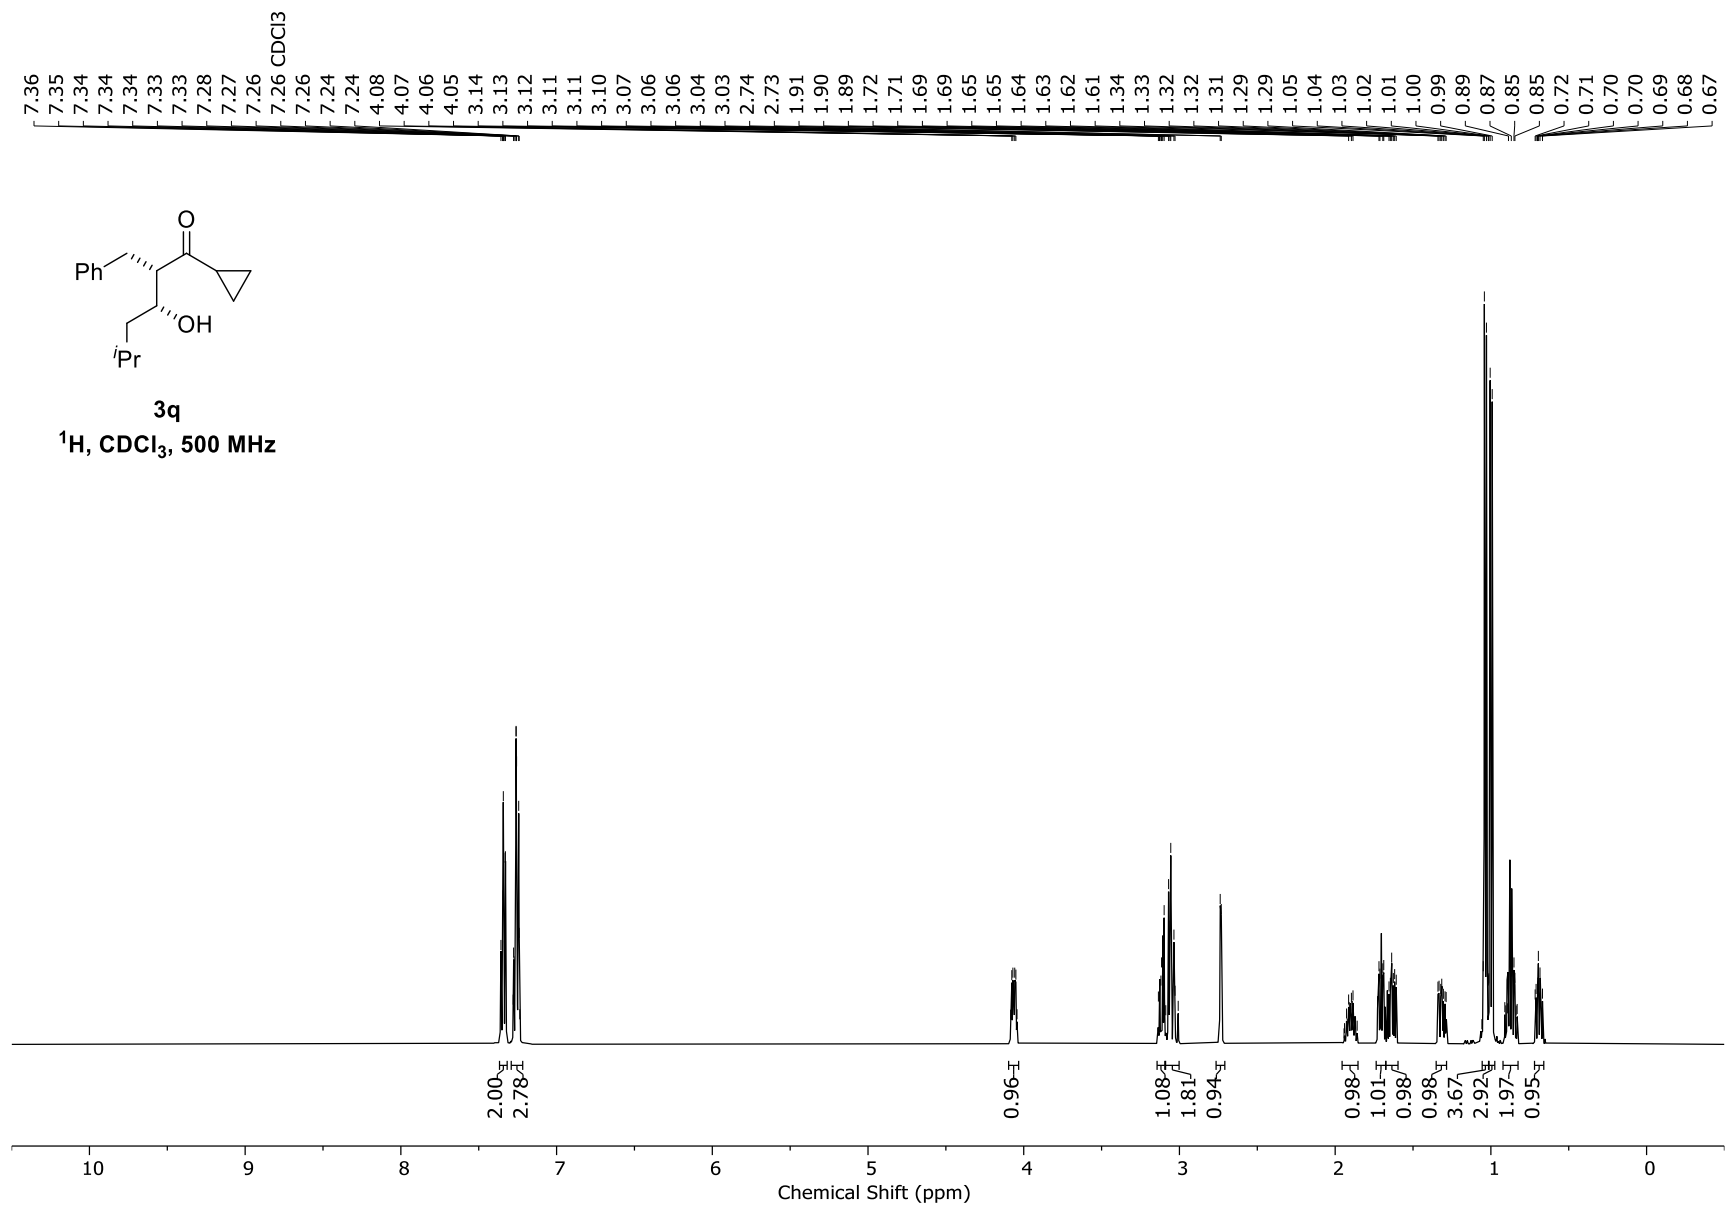

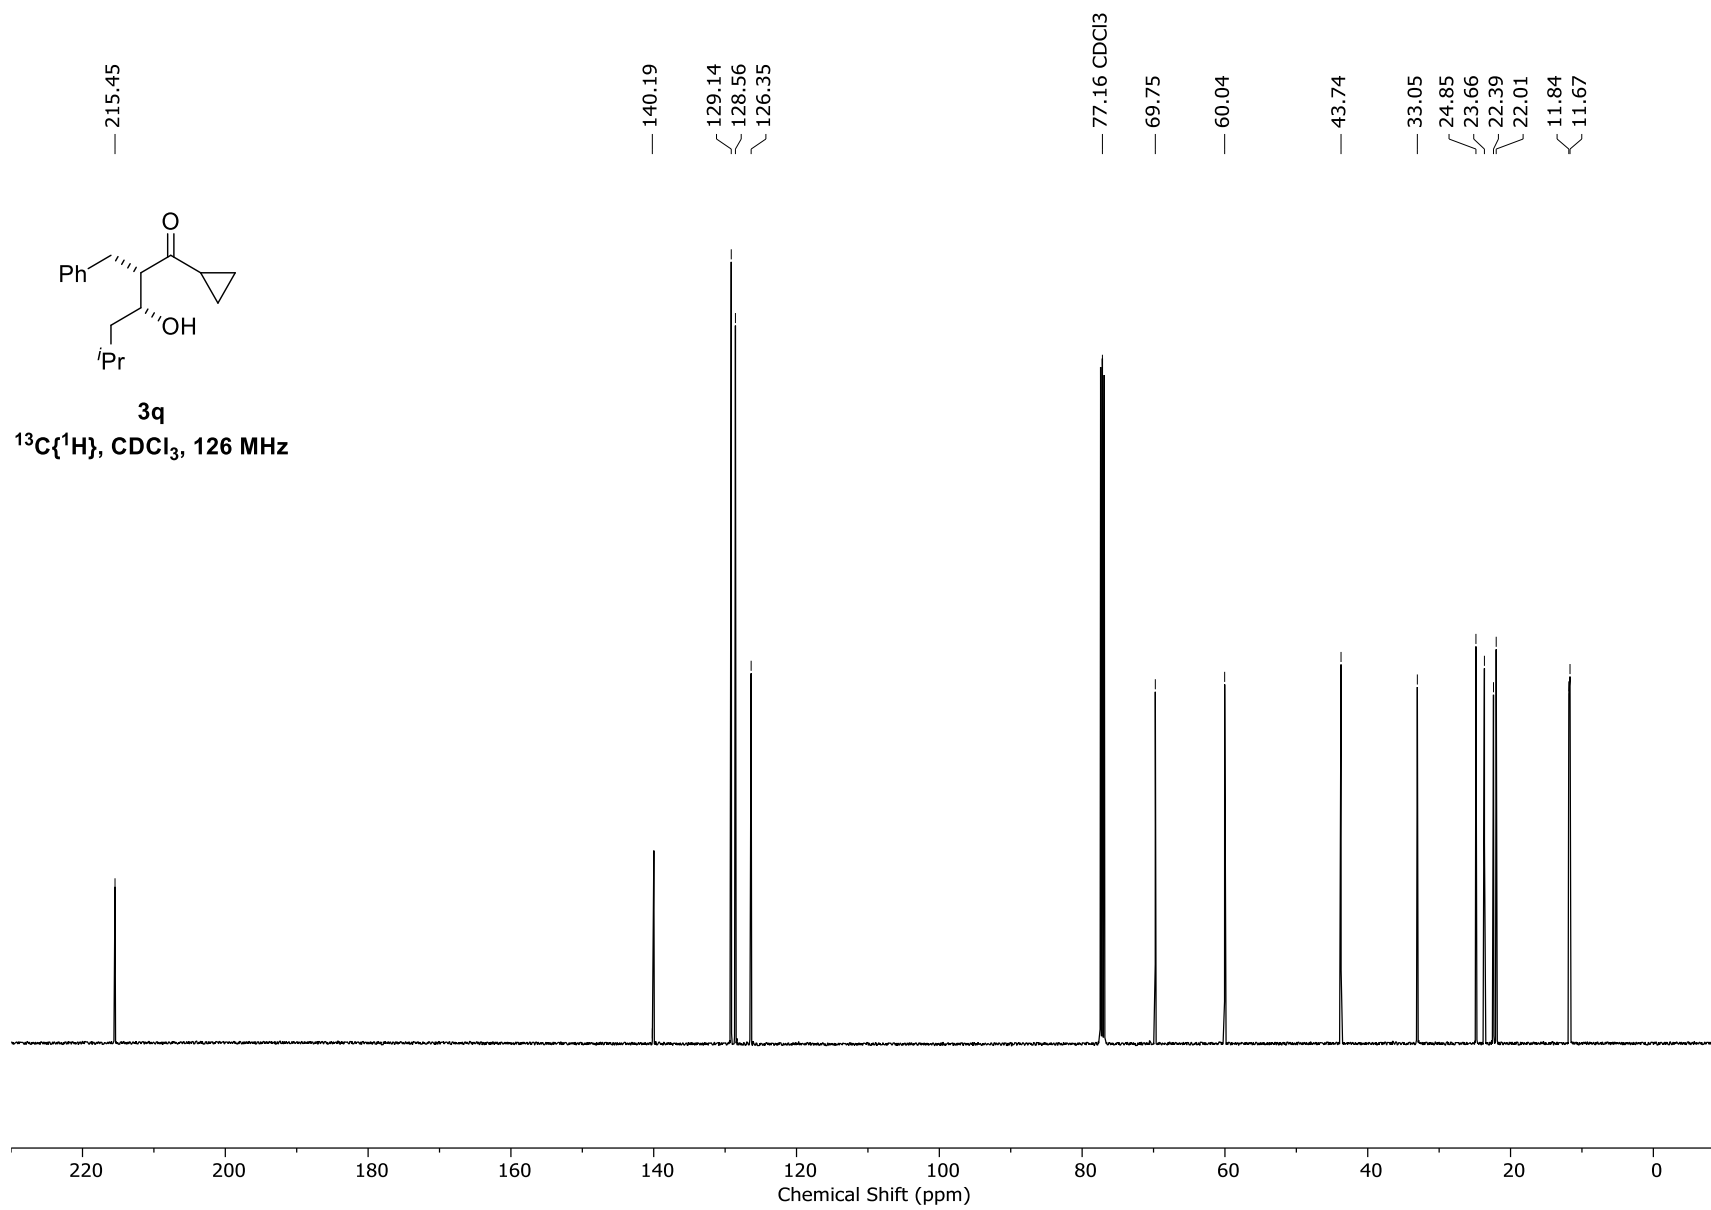

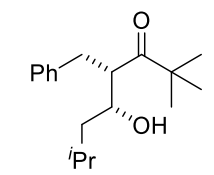

**3r**  
**Crude Reaction**  
**<sup>1</sup>H, CDCl<sub>3</sub>, 500 MHz**

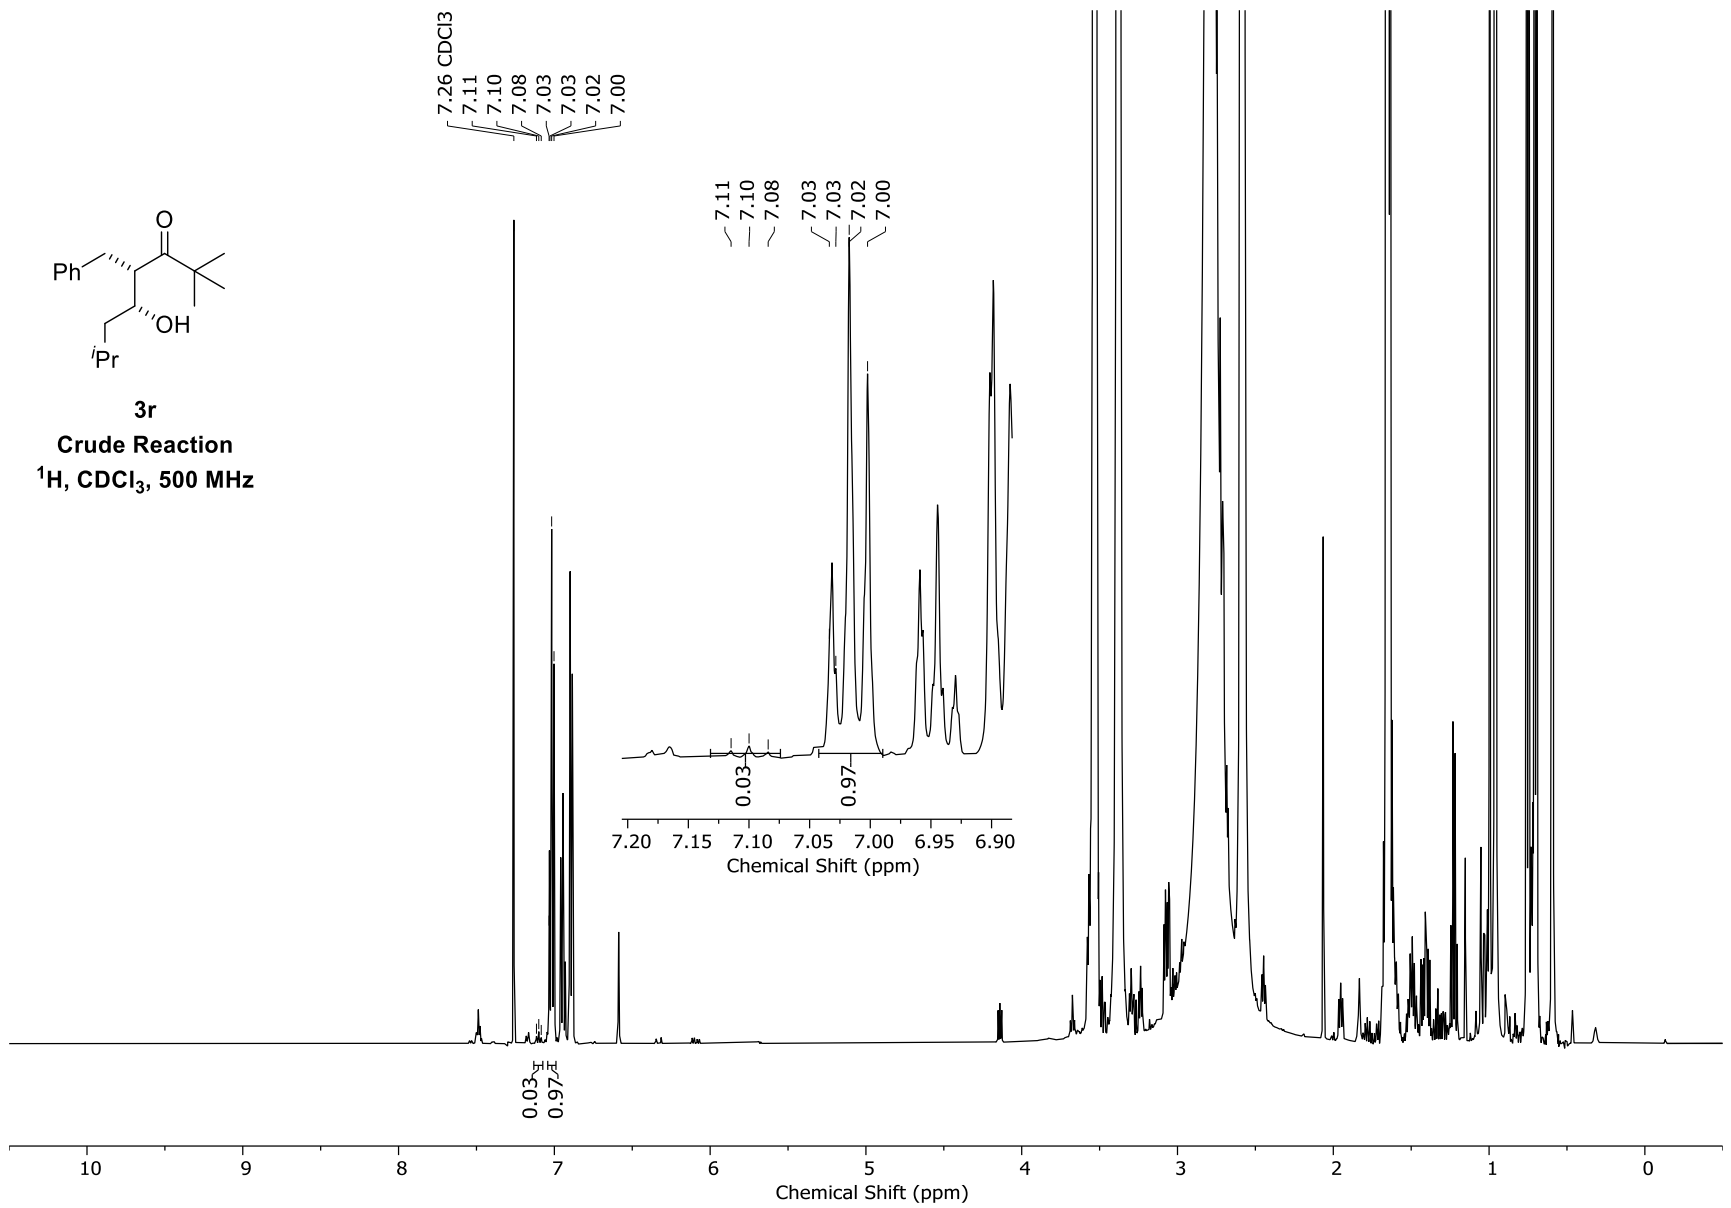

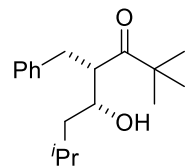

**3r**  
<sup>1</sup>H, CDCl<sub>3</sub>, 500 MHz

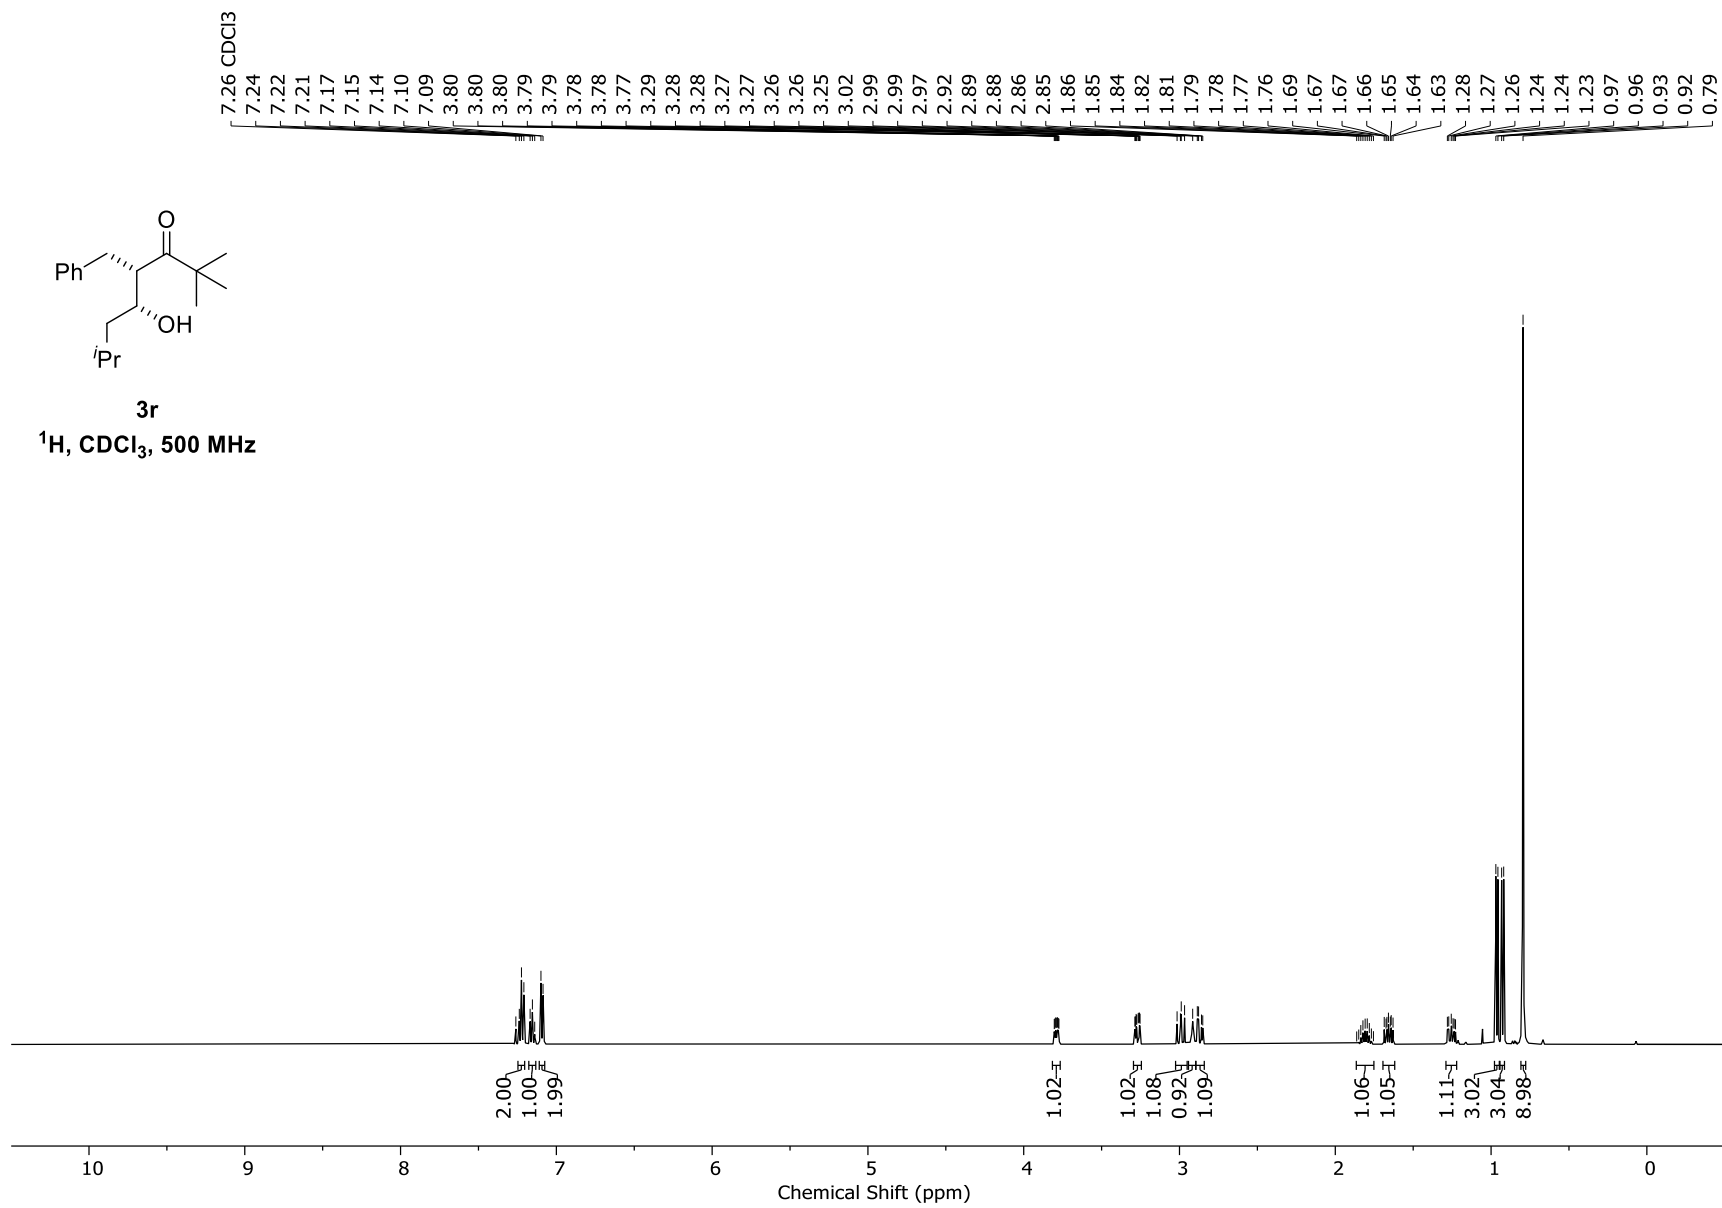

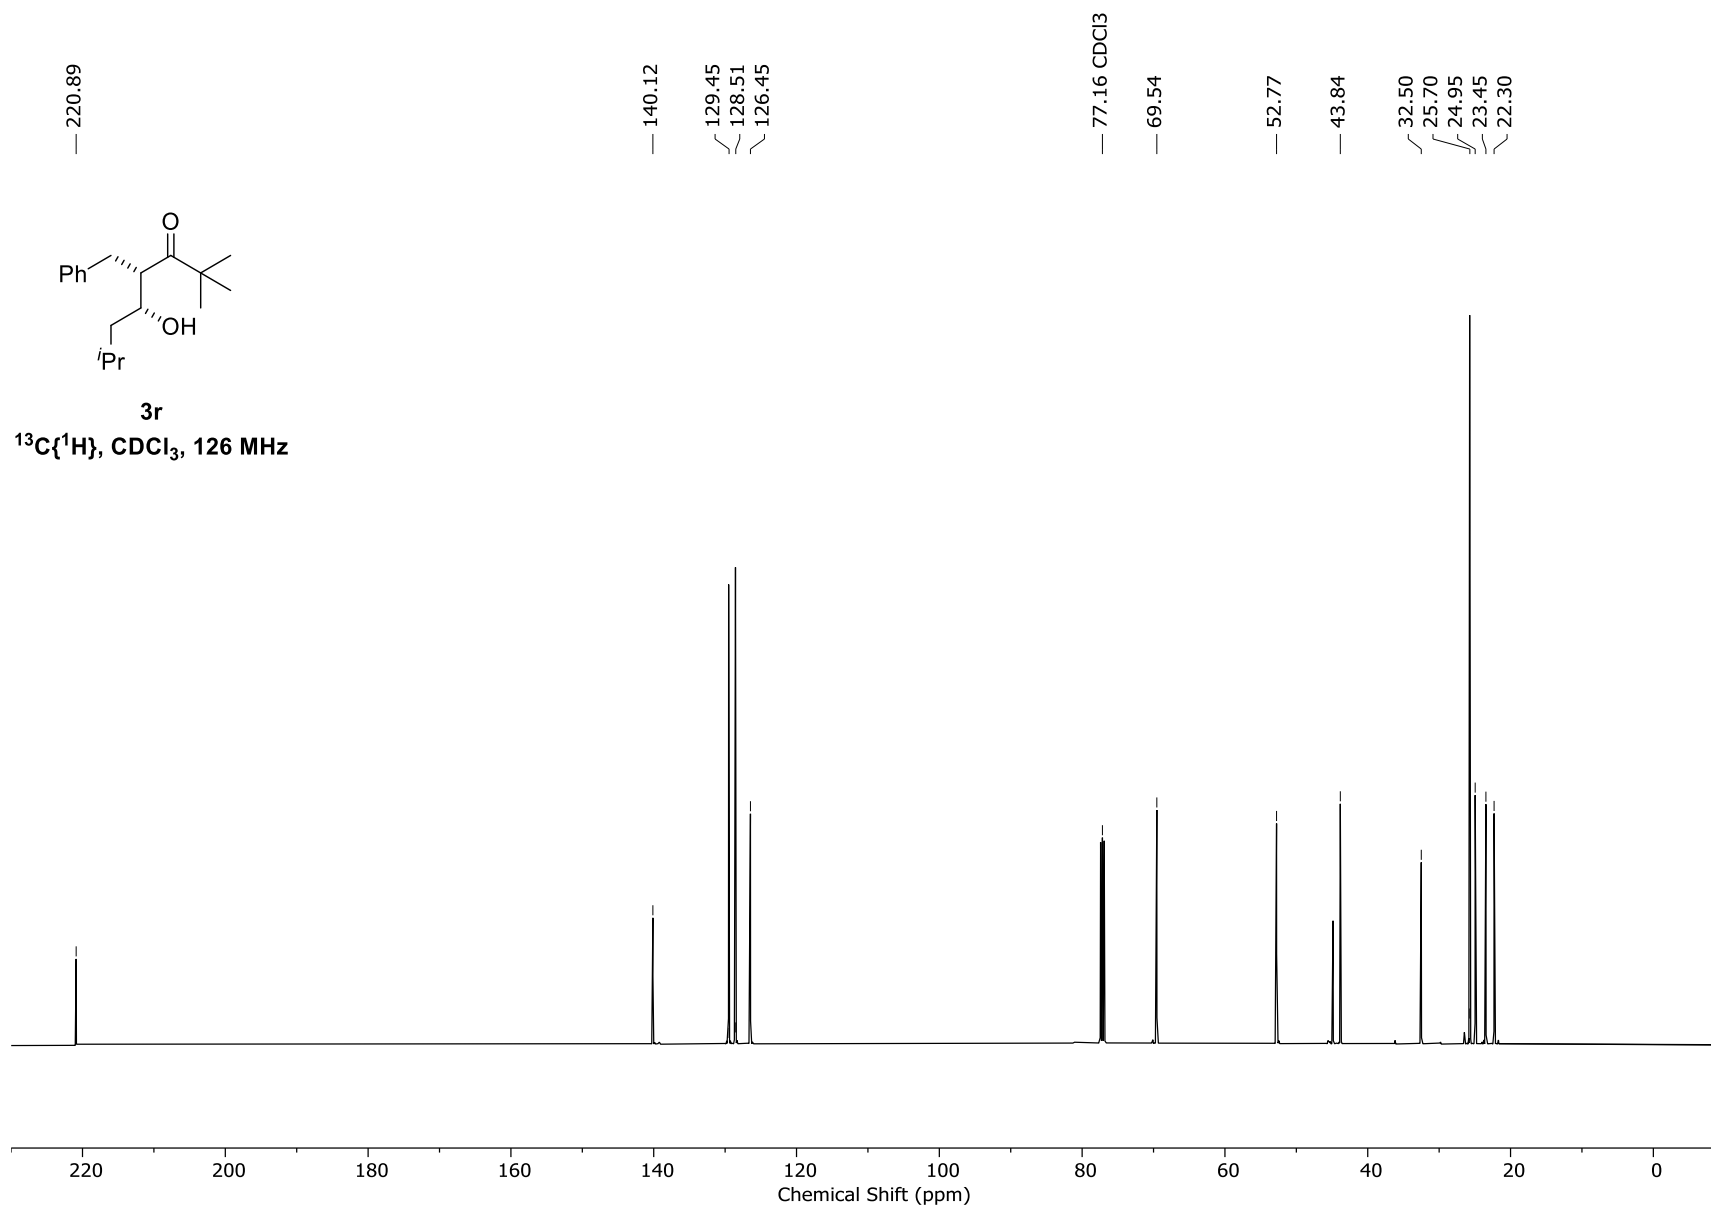

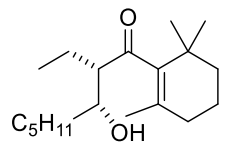

**3s**  
Crude Reaction  
<sup>1</sup>H, CDCl<sub>3</sub>, 600 MHz

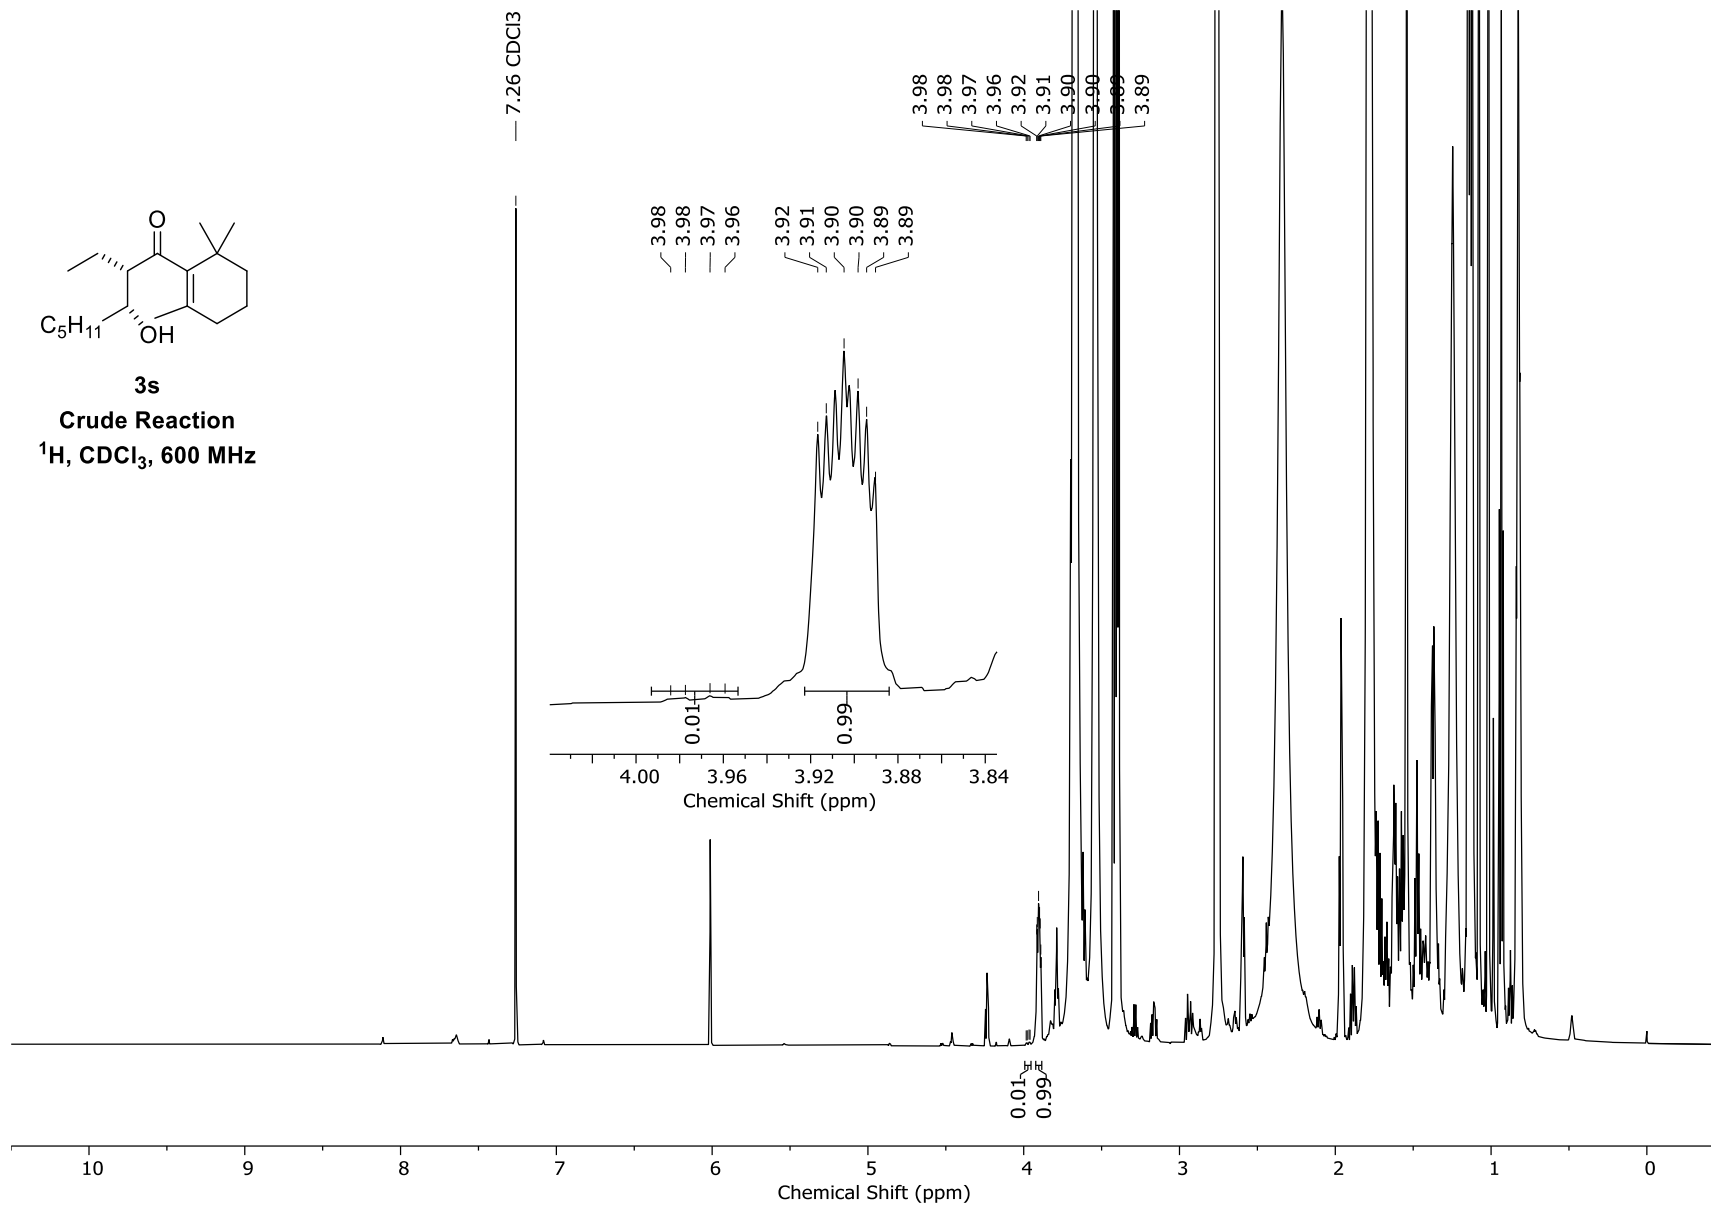

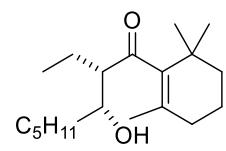

**3s**  
<sup>1</sup>H, CDCl<sub>3</sub>, 500 MHz

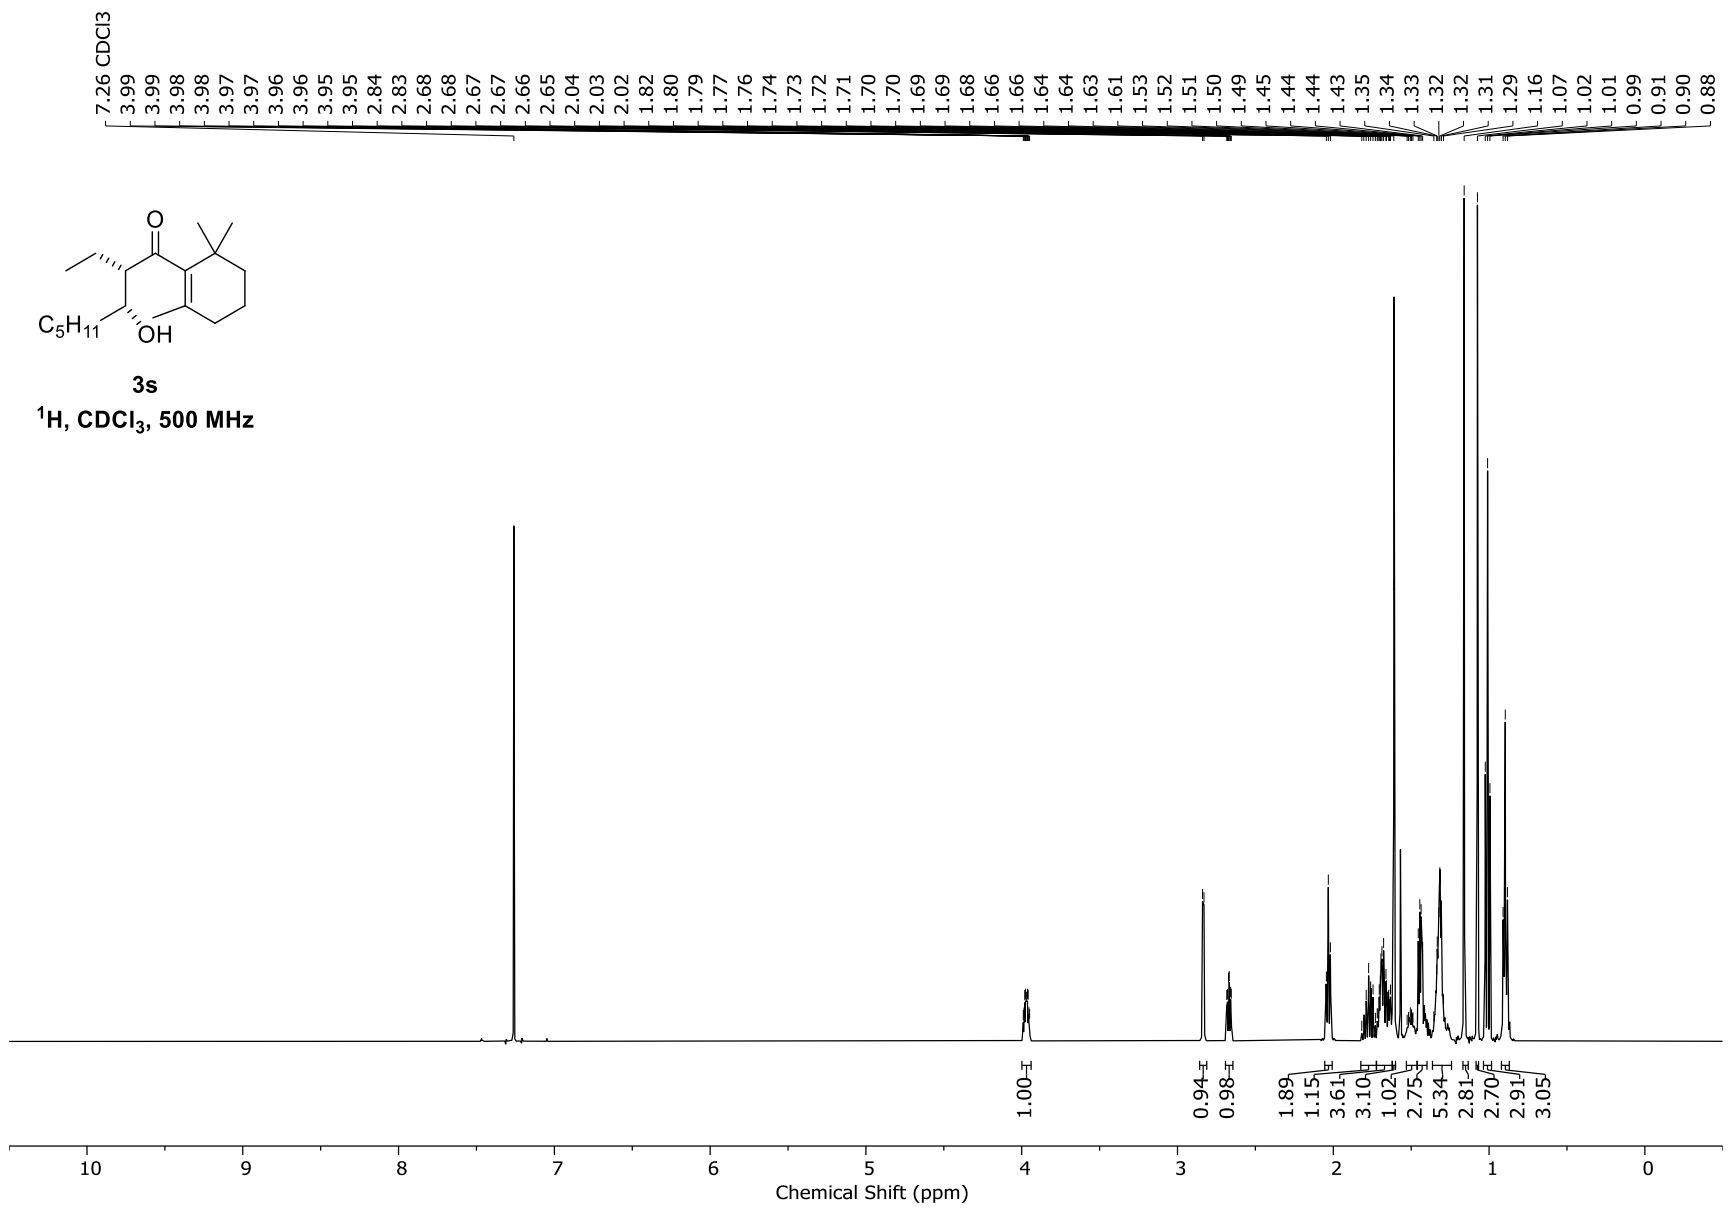

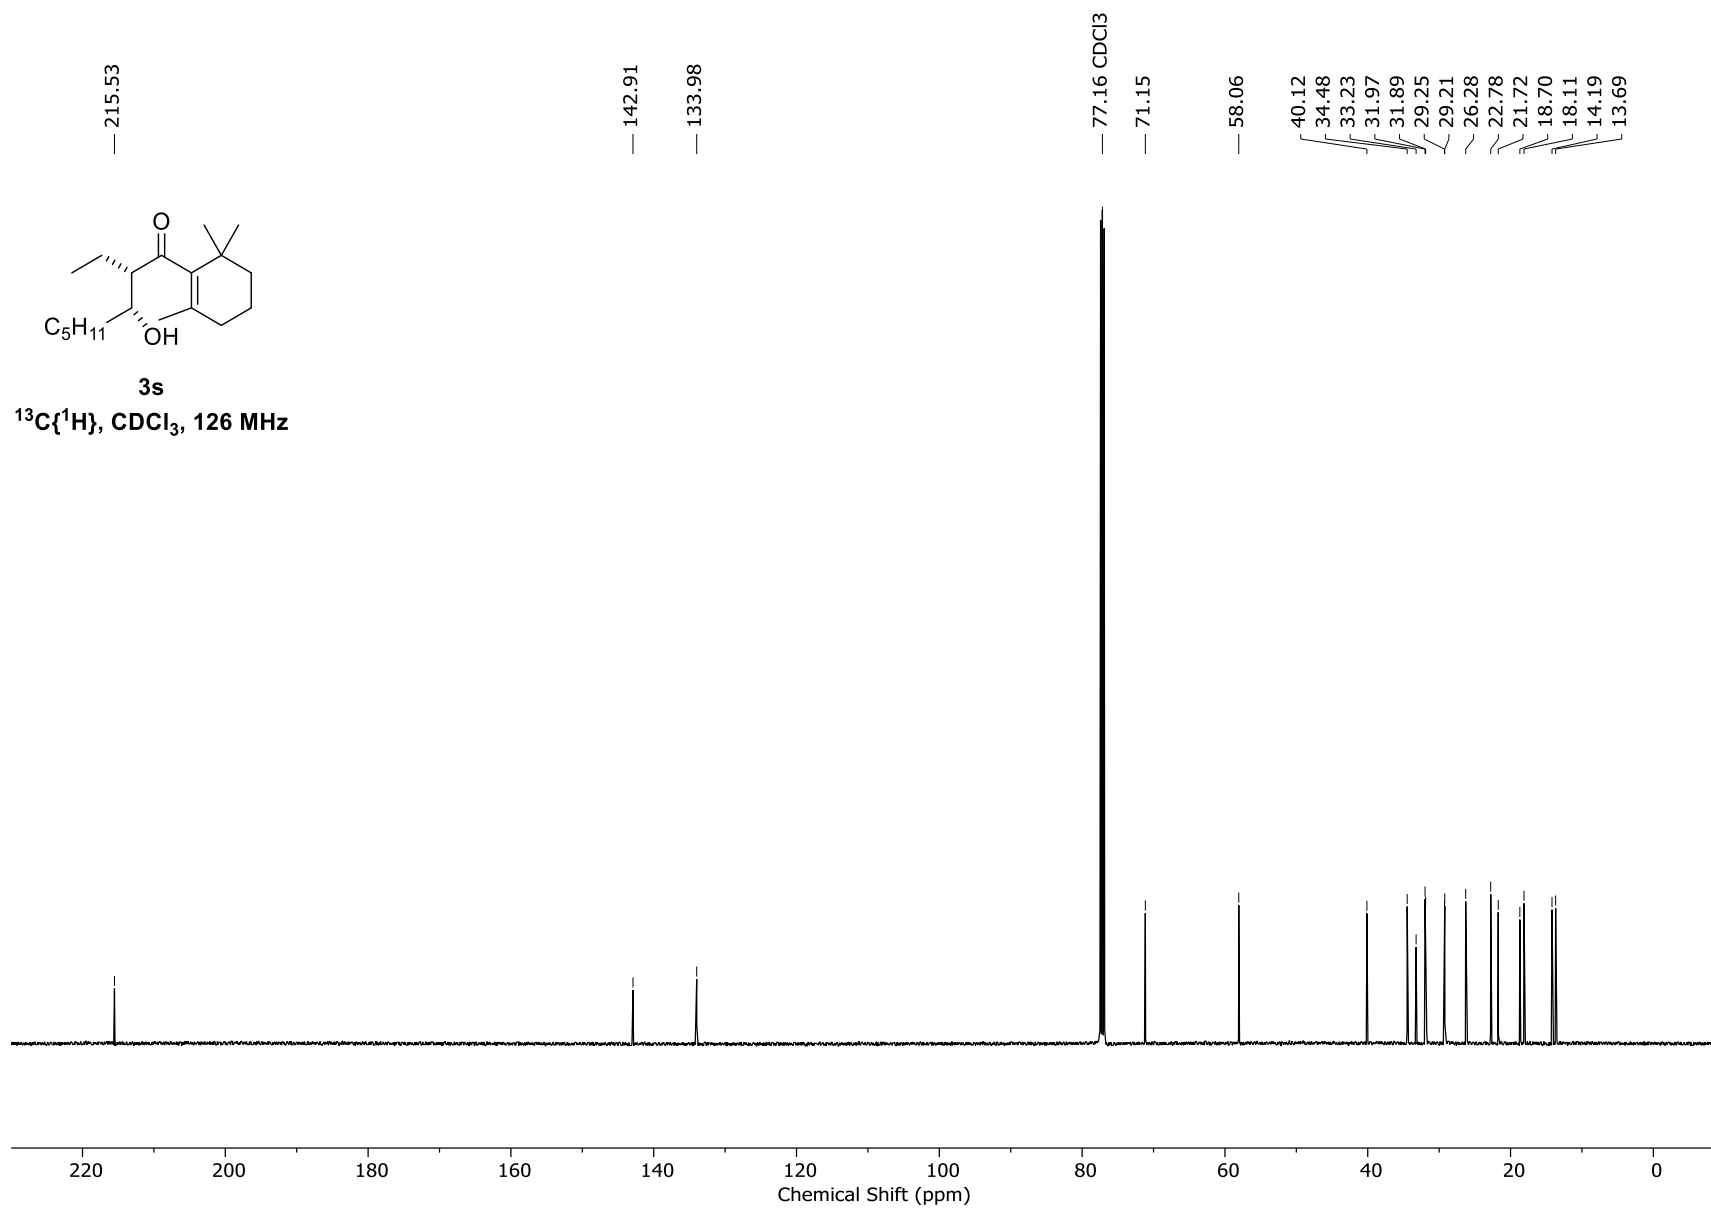

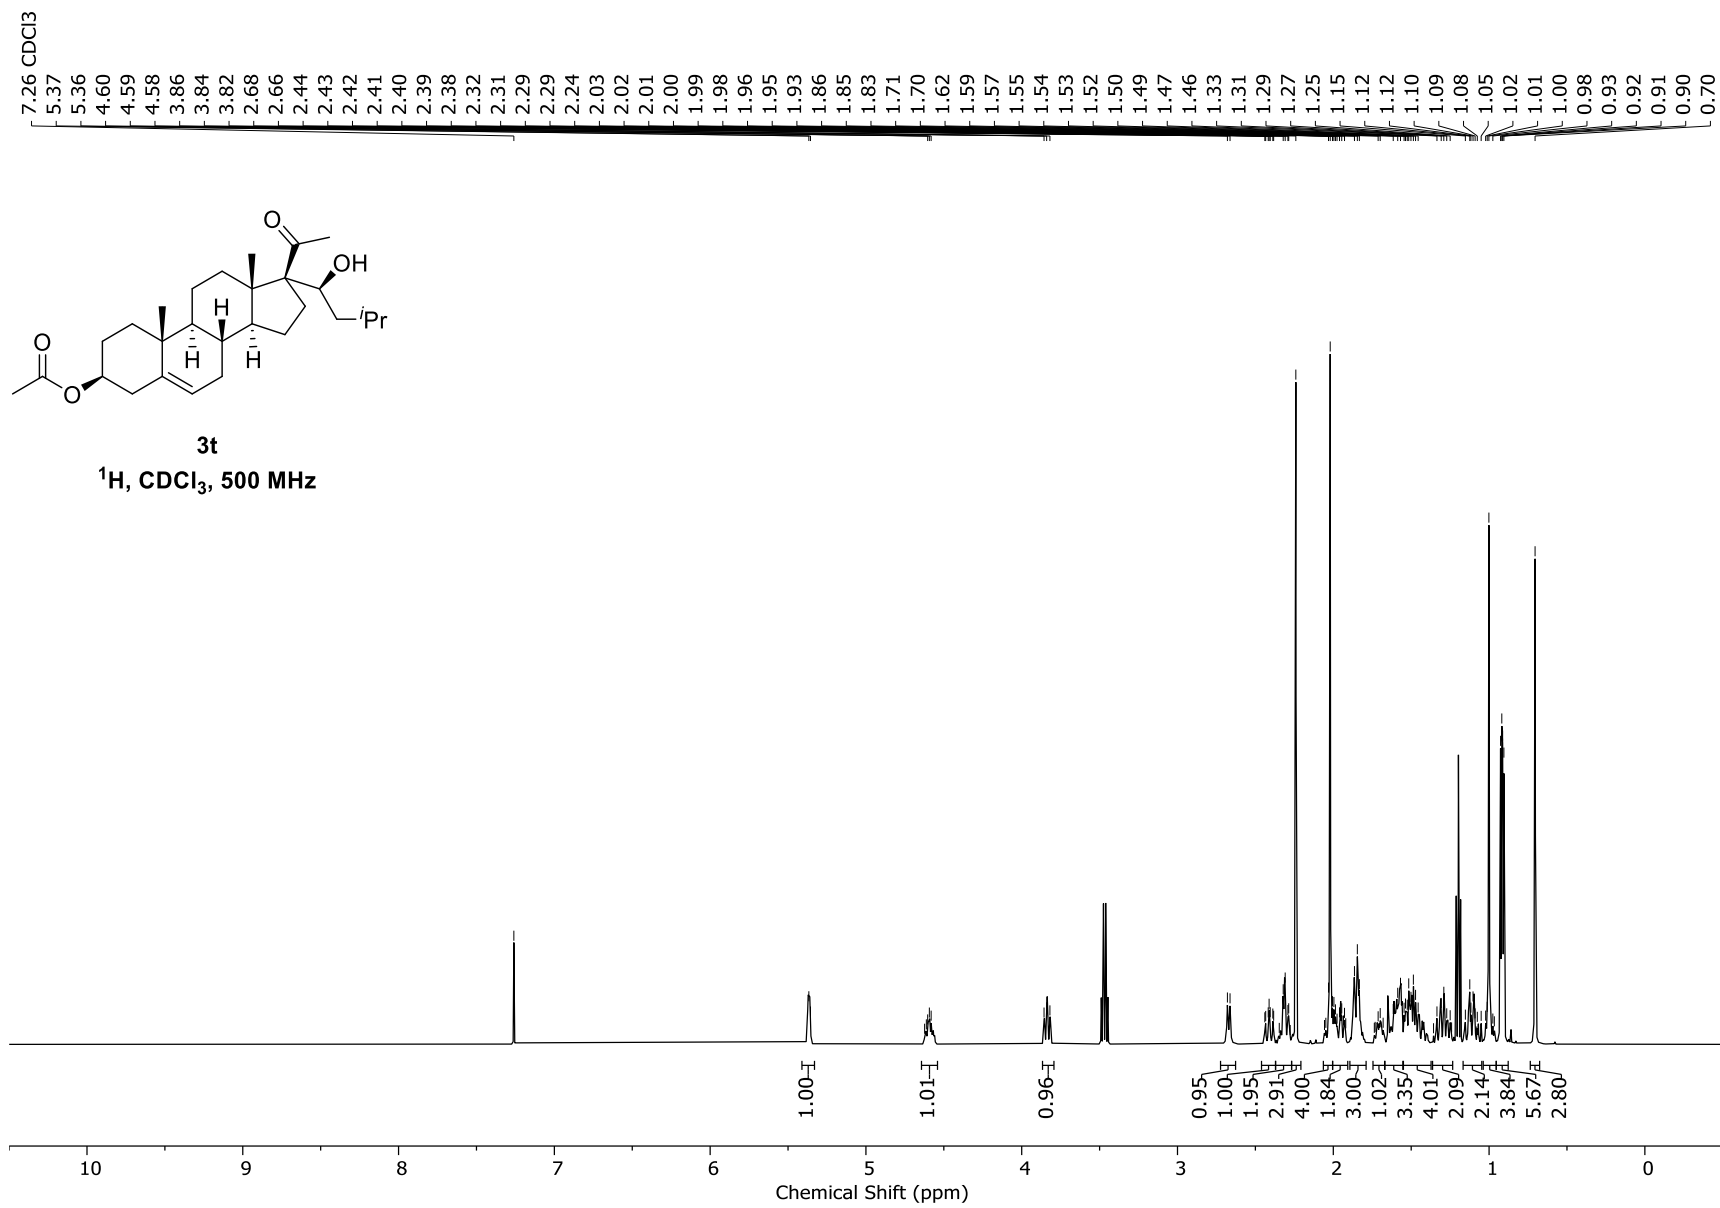

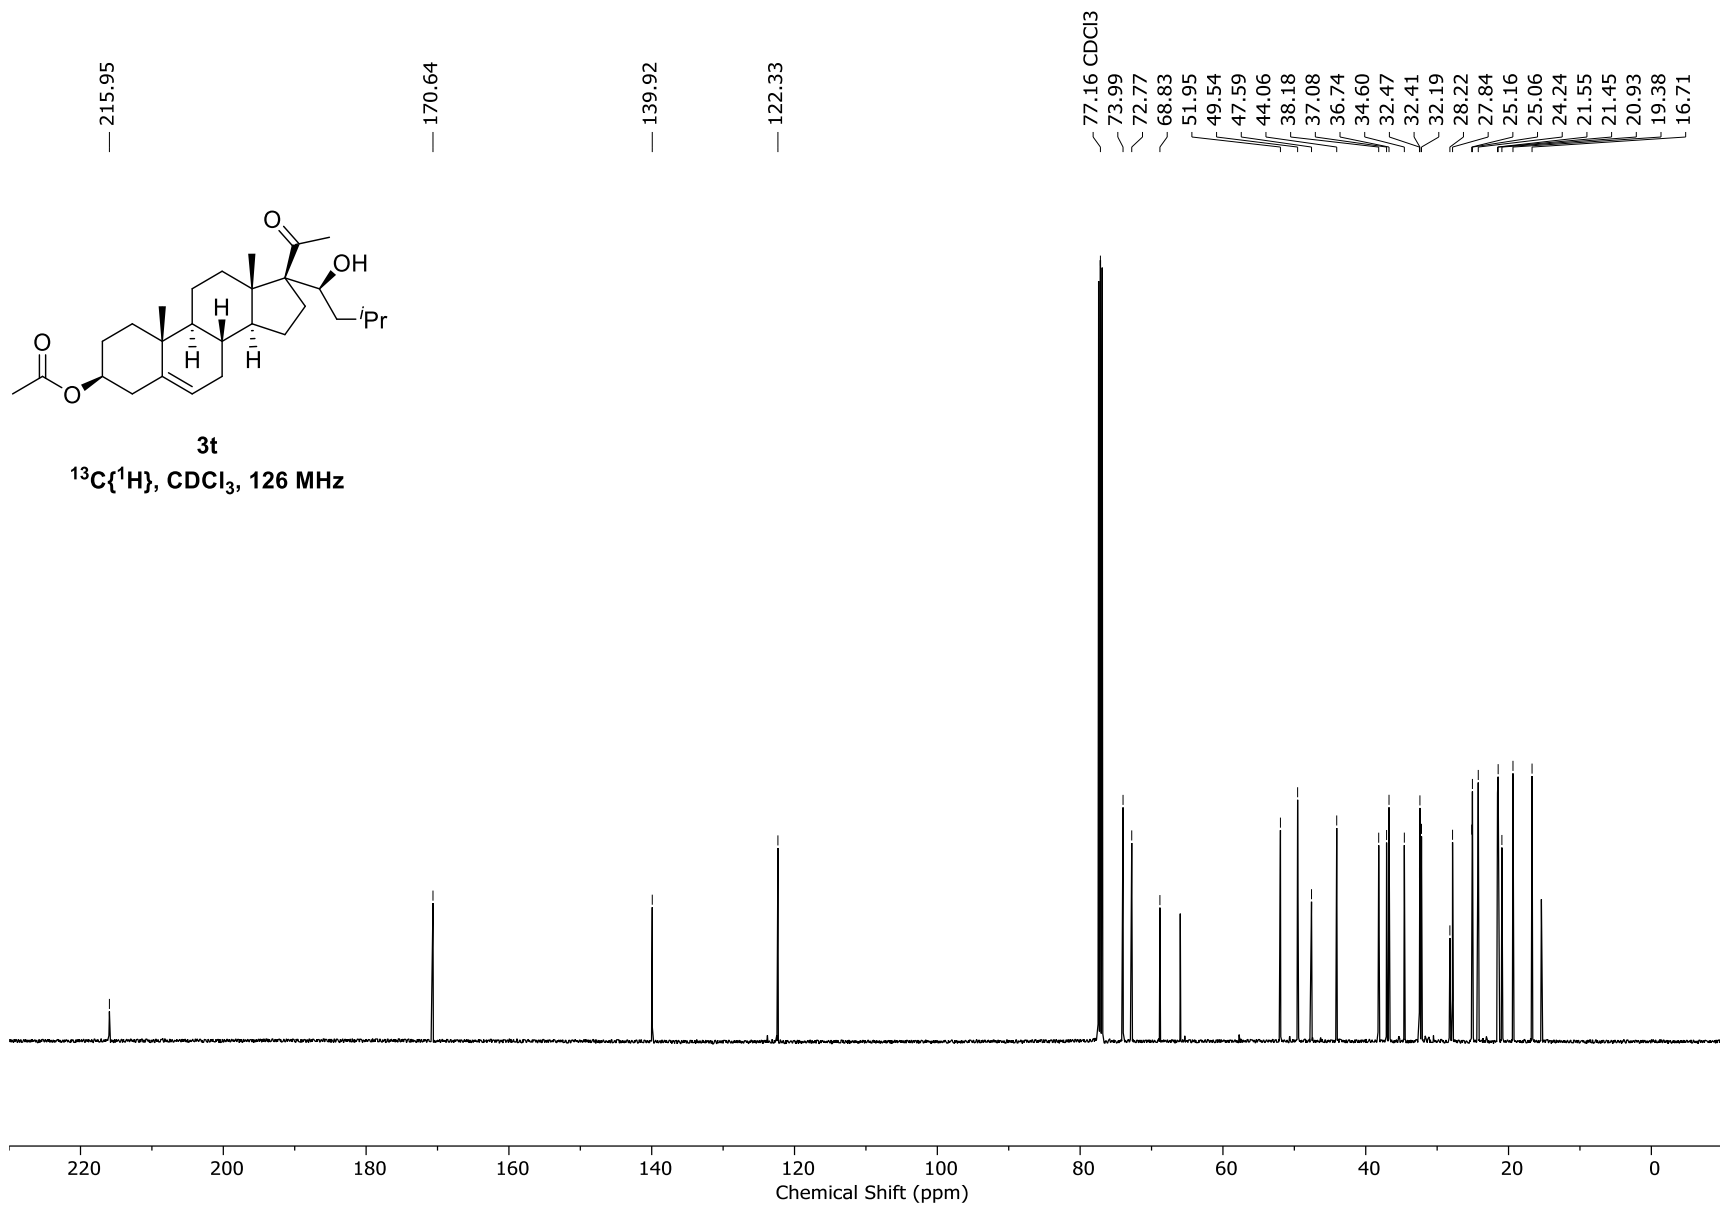

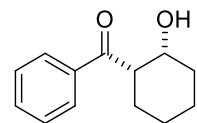

**6**  
Crude Reaction  
<sup>1</sup>H, CDCl<sub>3</sub>, 600 MHz

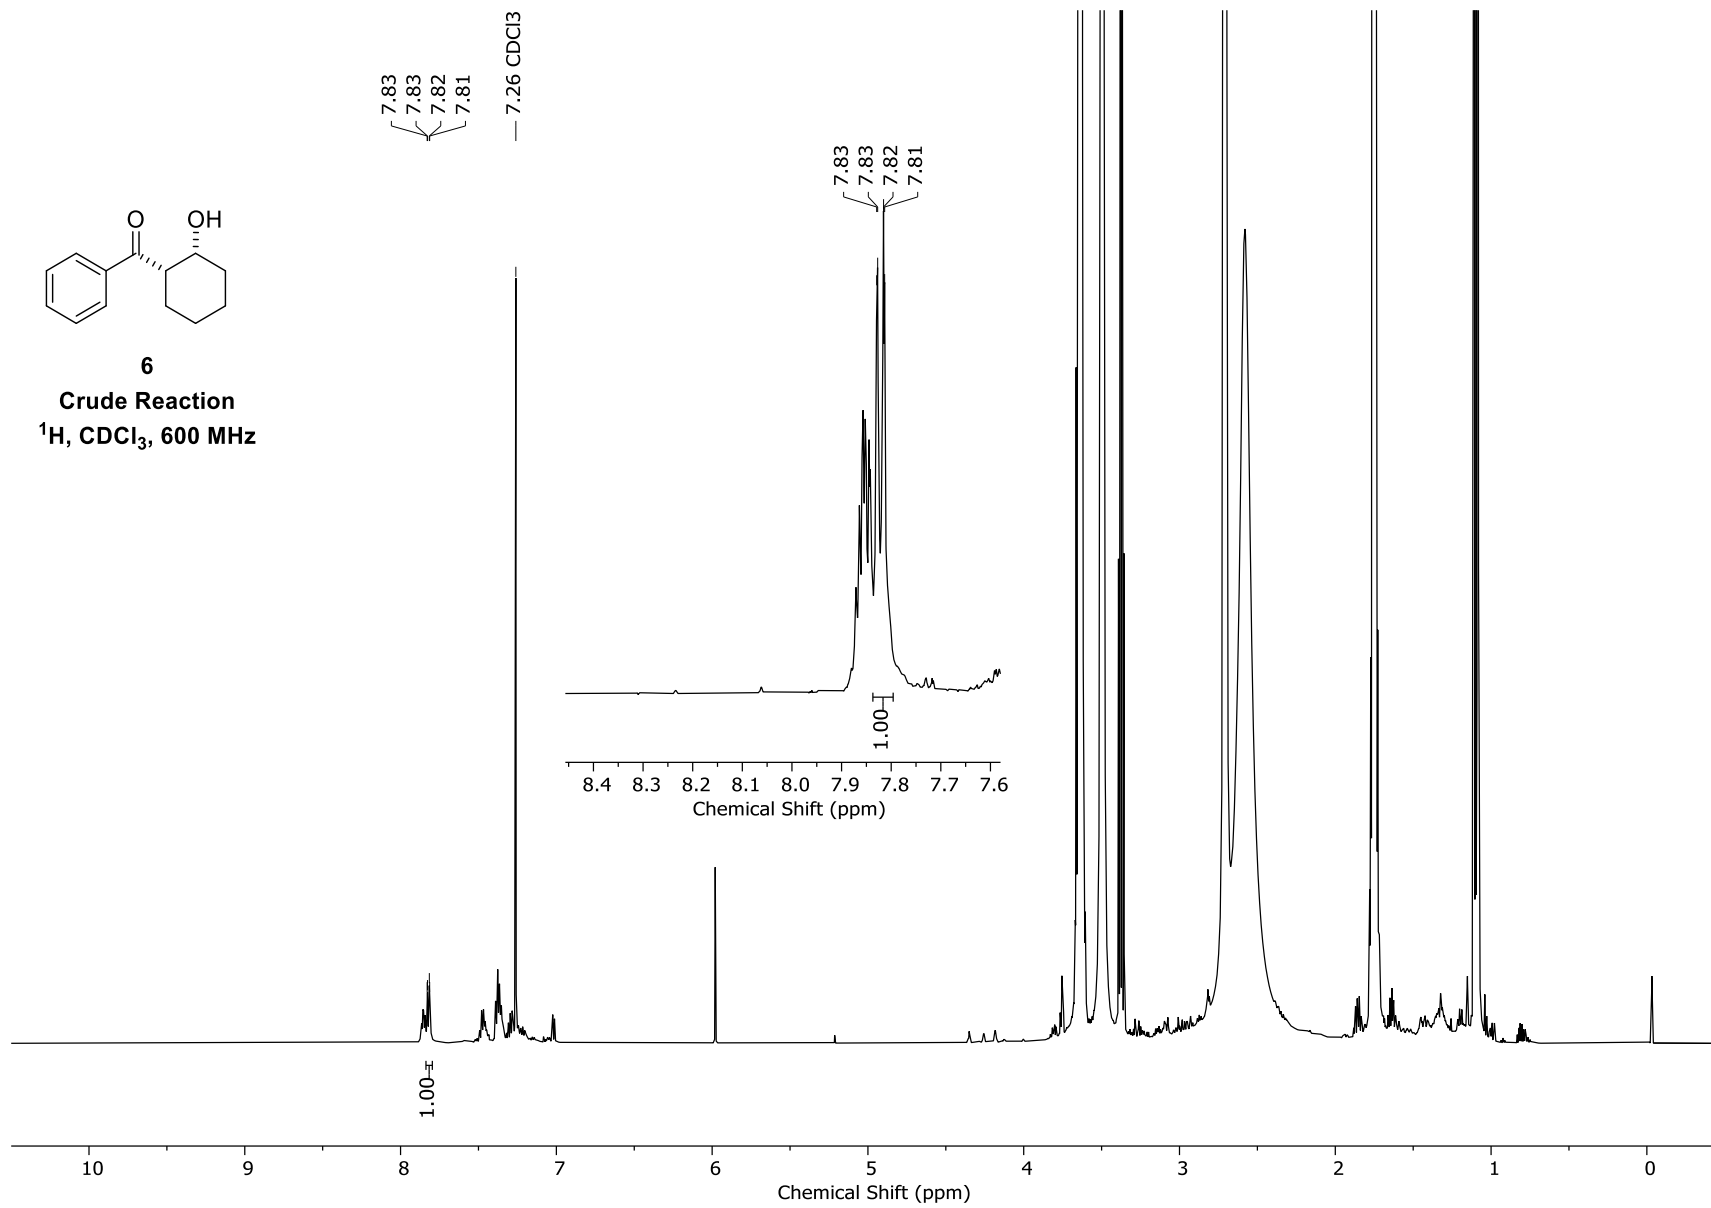

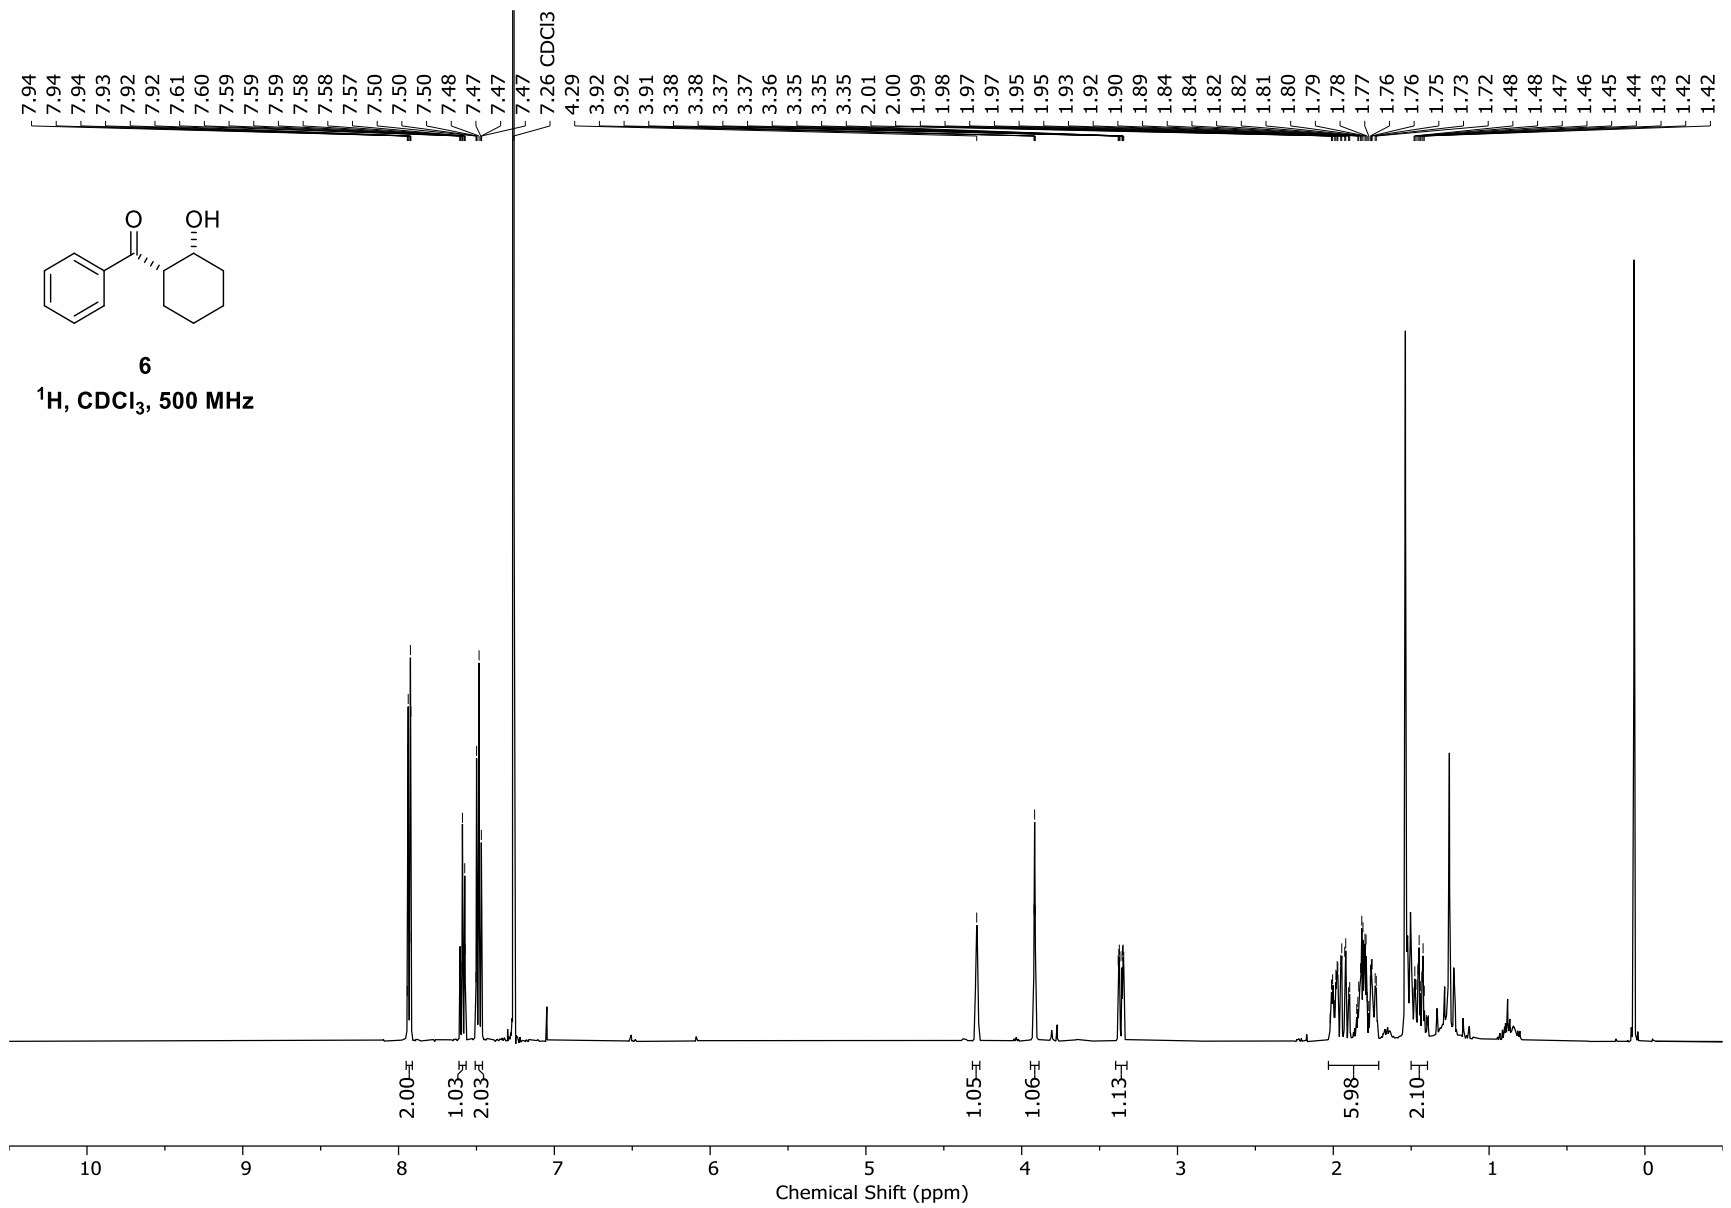

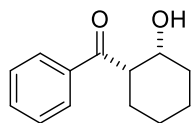

6

$^{13}\text{C}\{^1\text{H}\}$ ,  $\text{CDCl}_3$ , 126 MHz

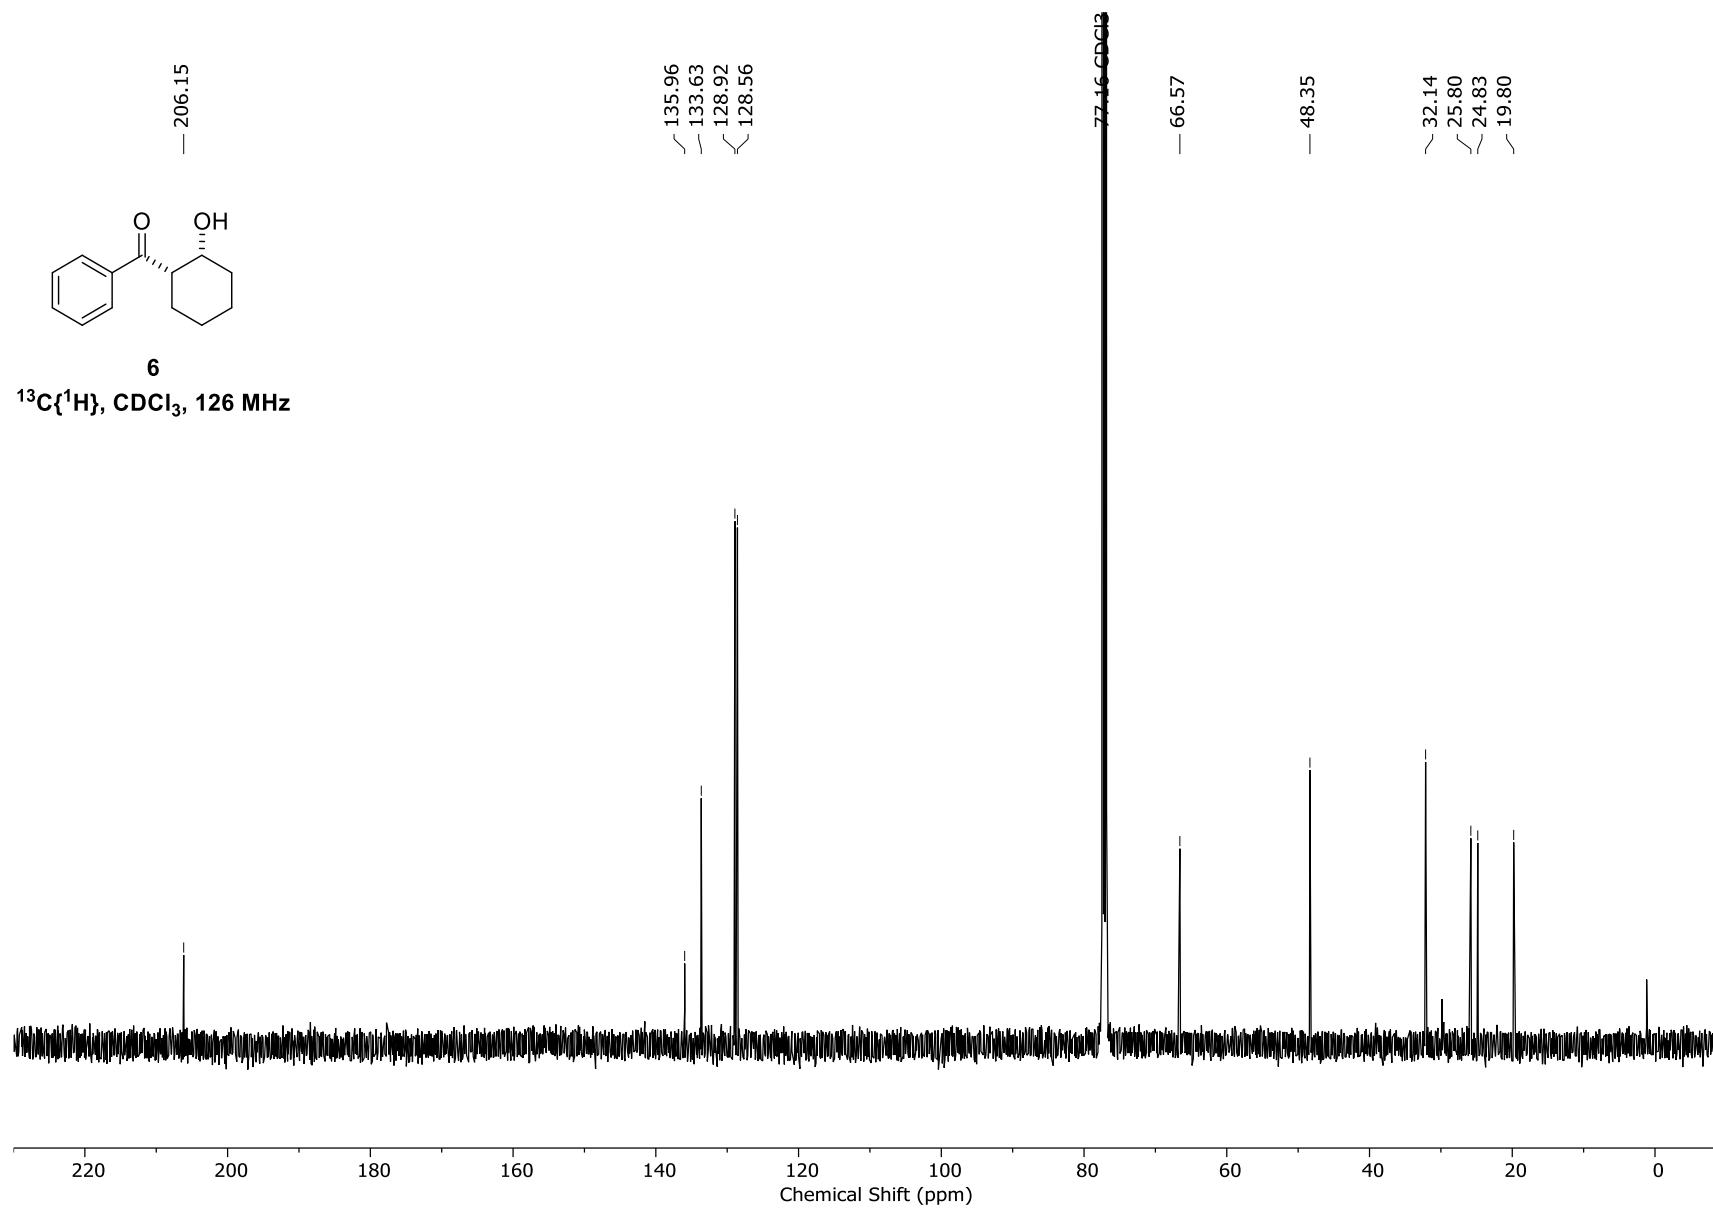

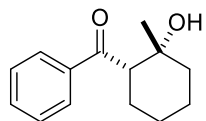

**8**  
Crude Reaction  
 $^1\text{H}$ ,  $\text{CDCl}_3$ , 500 MHz

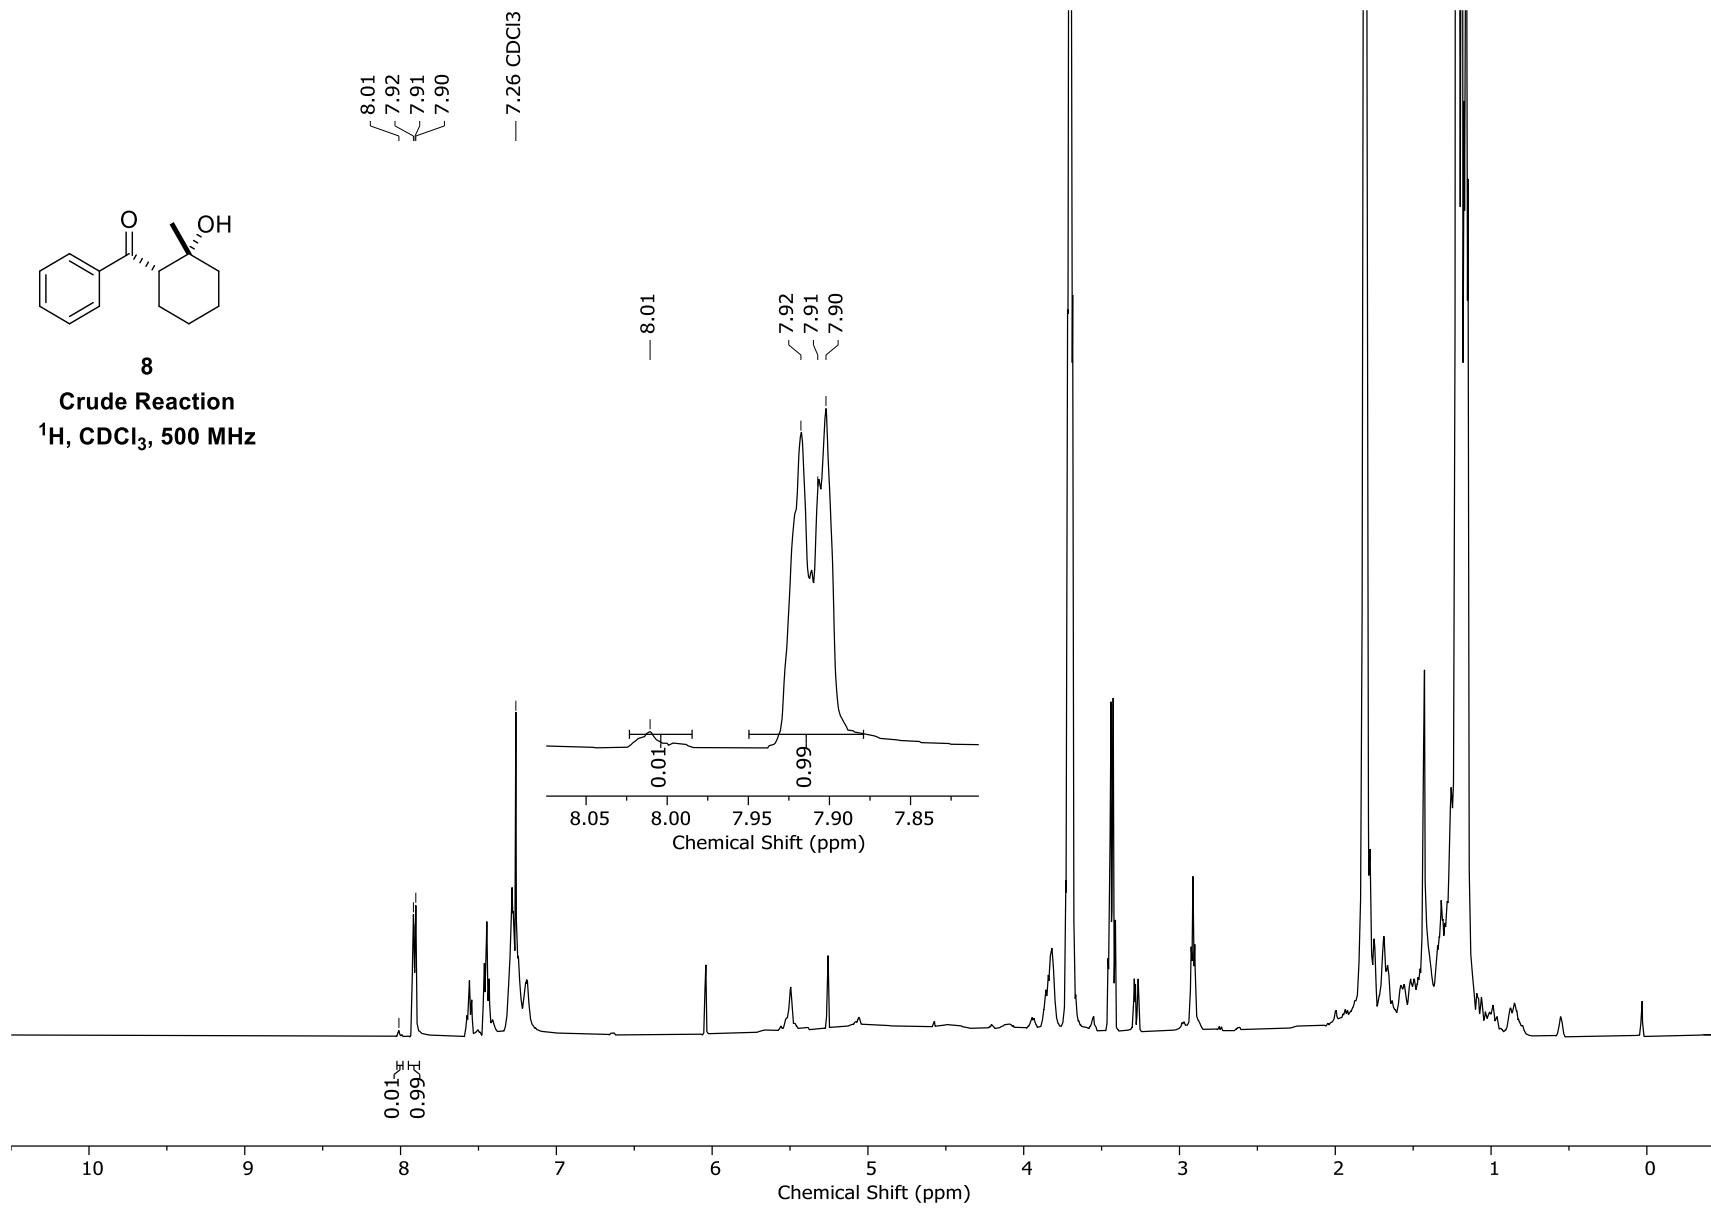

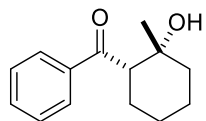

8

$^1\text{H}$ ,  $\text{CDCl}_3$ , 500 MHz

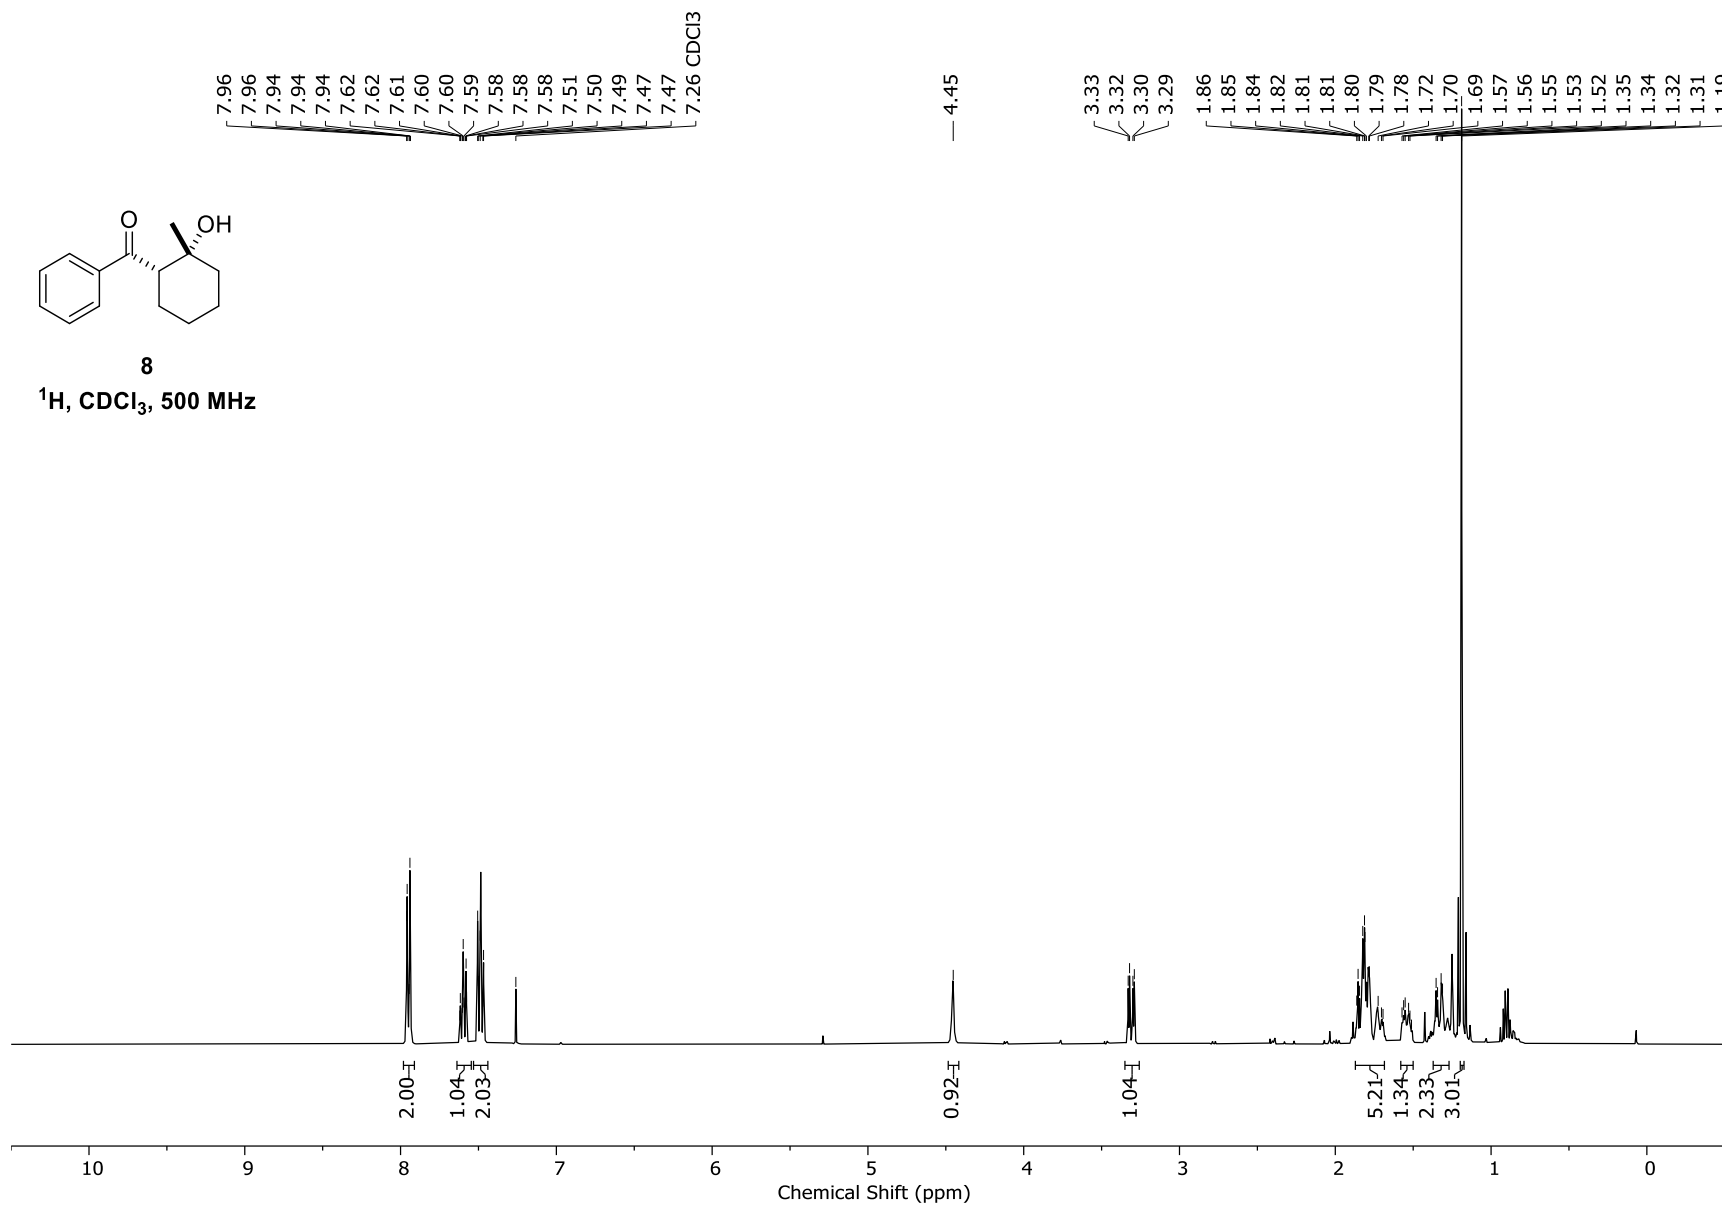

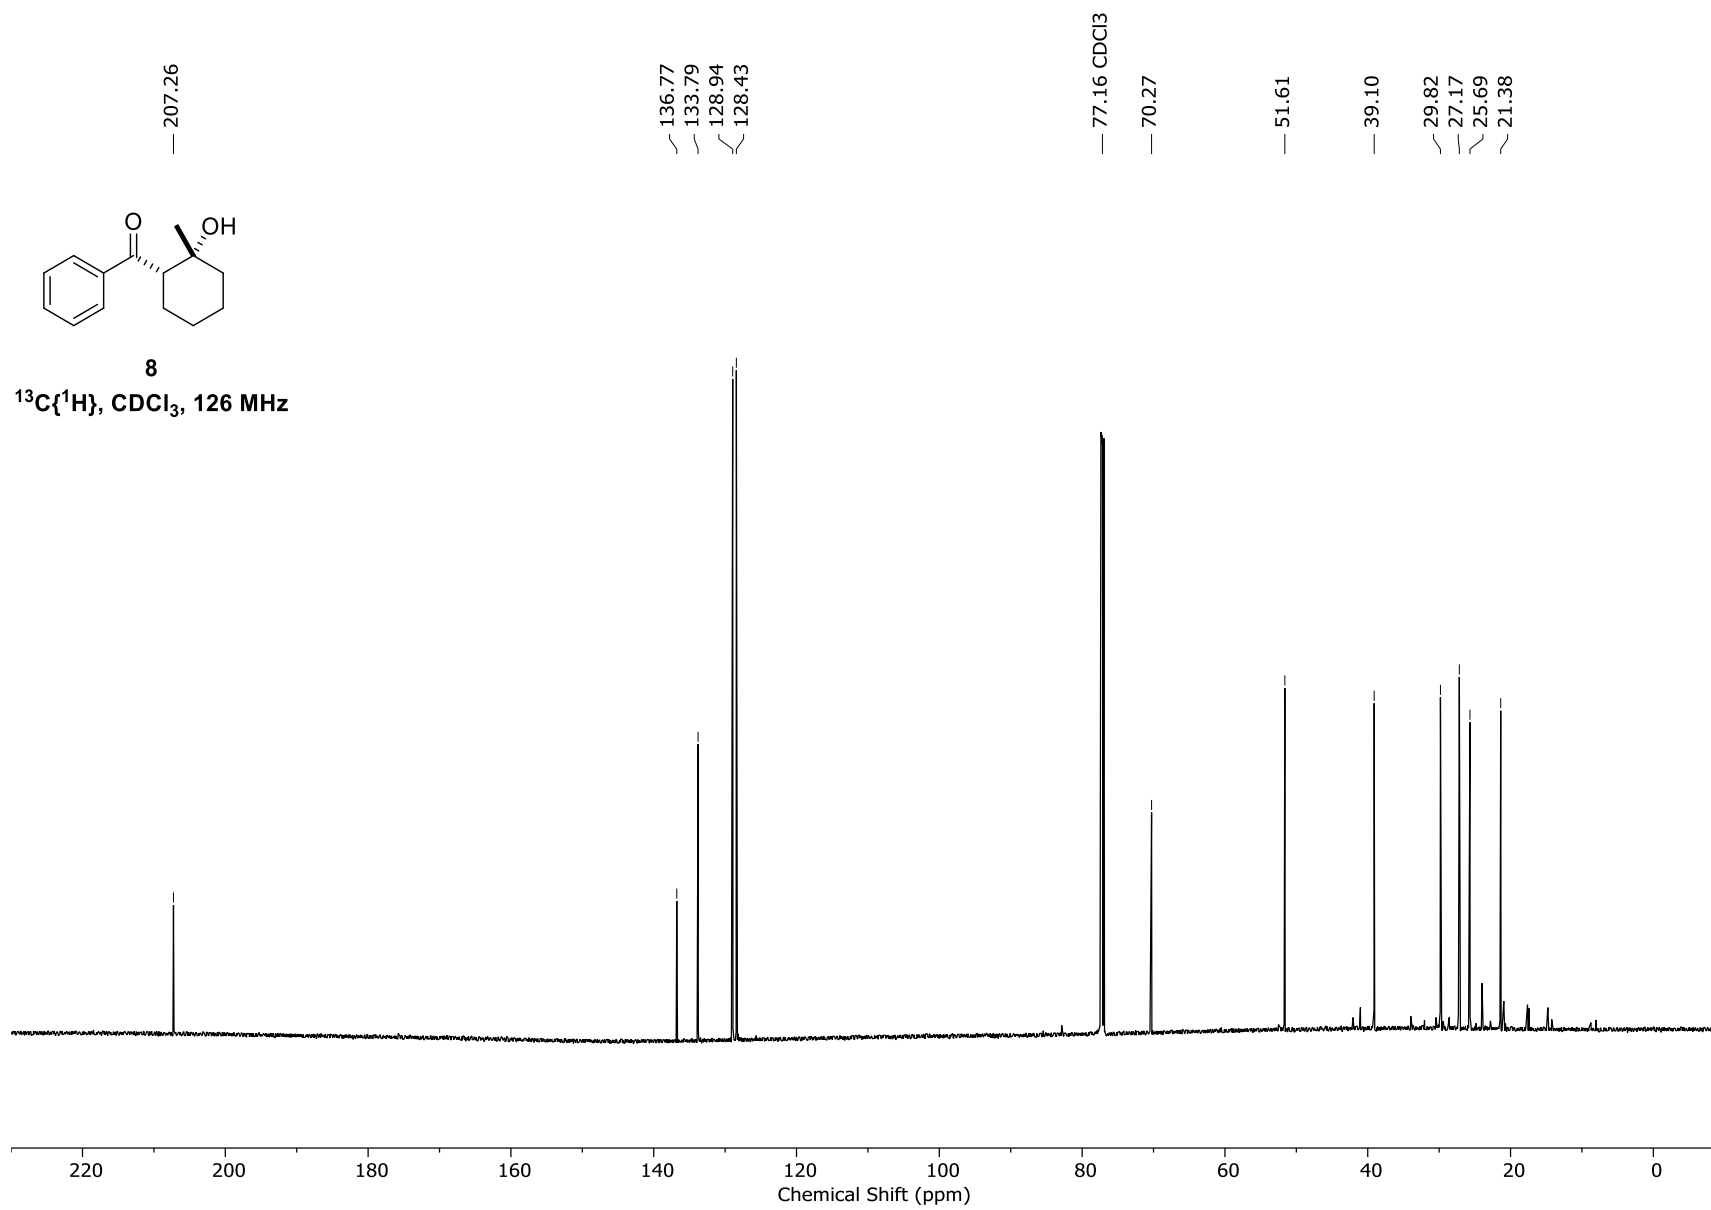

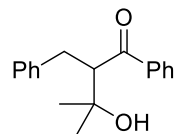

**10**  
<sup>1</sup>H, CDCl<sub>3</sub>, 500 MHz

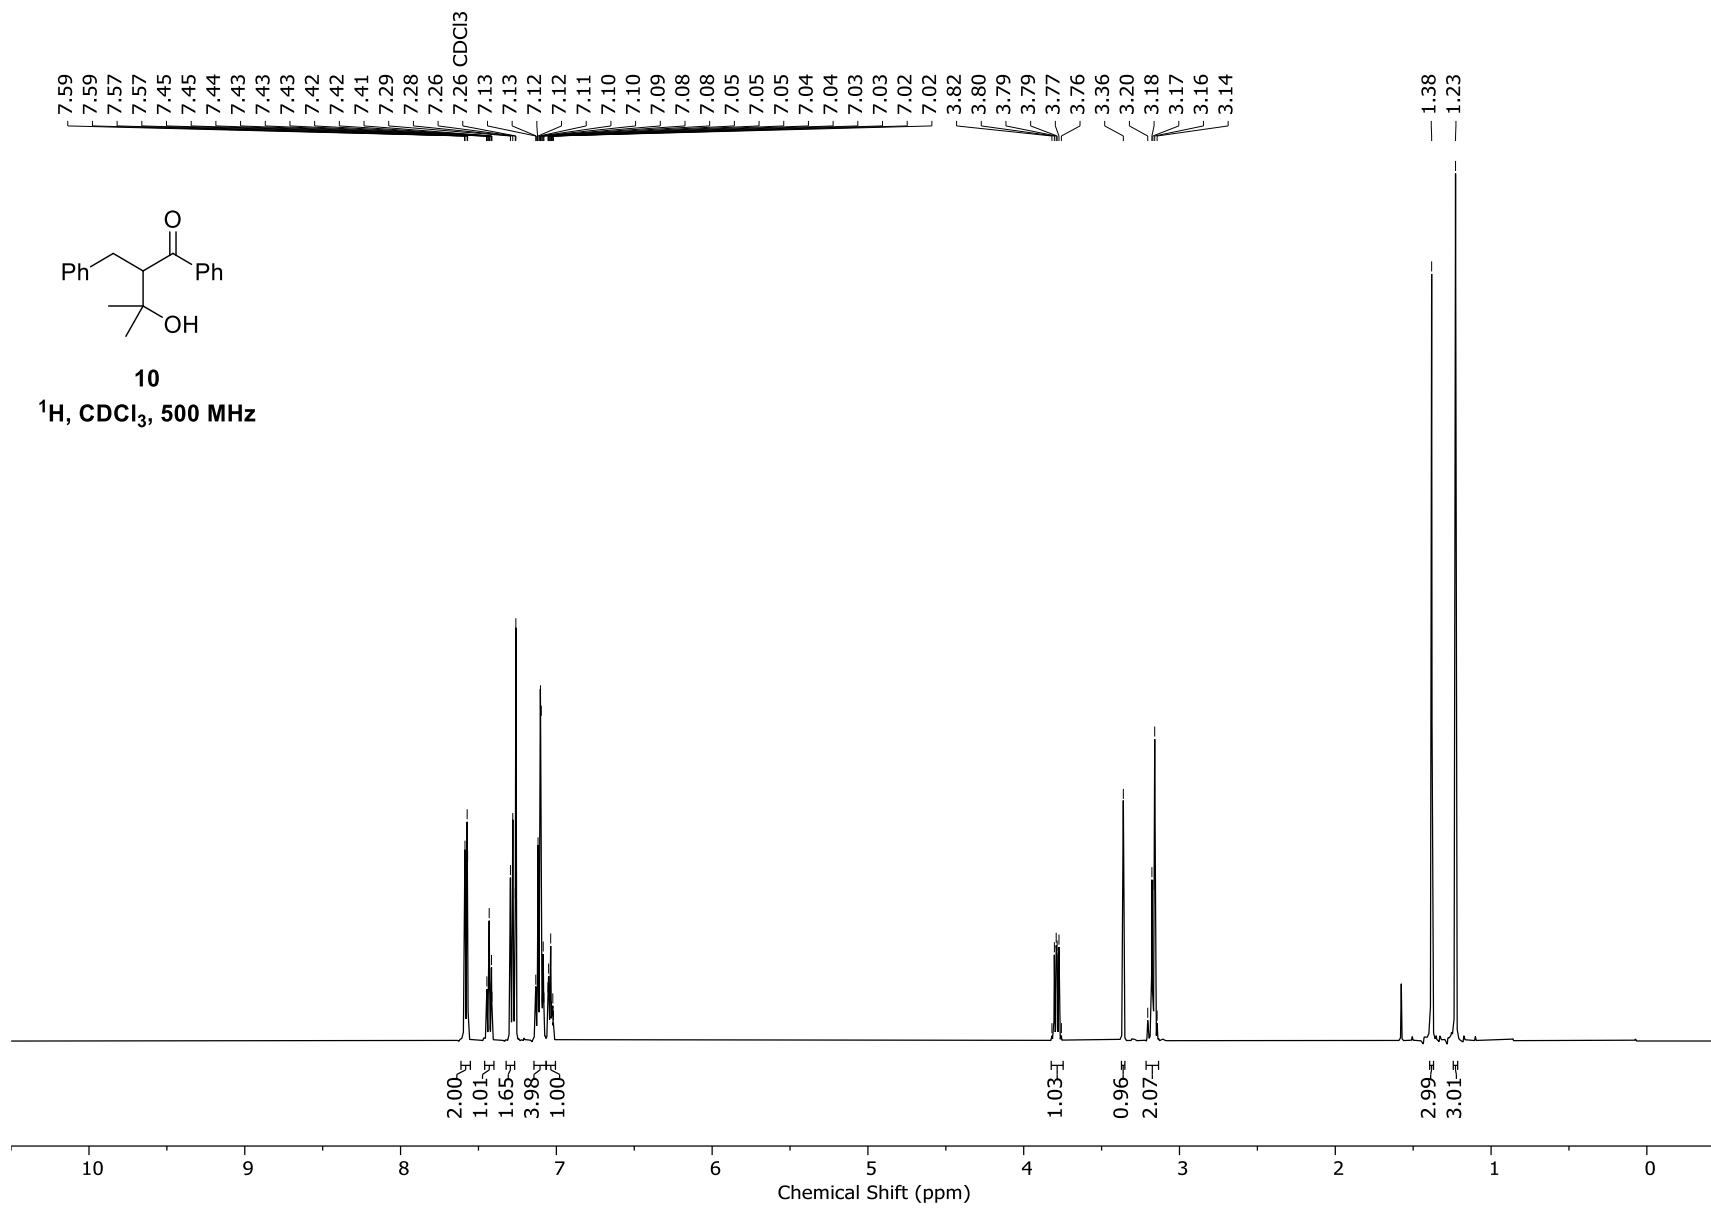

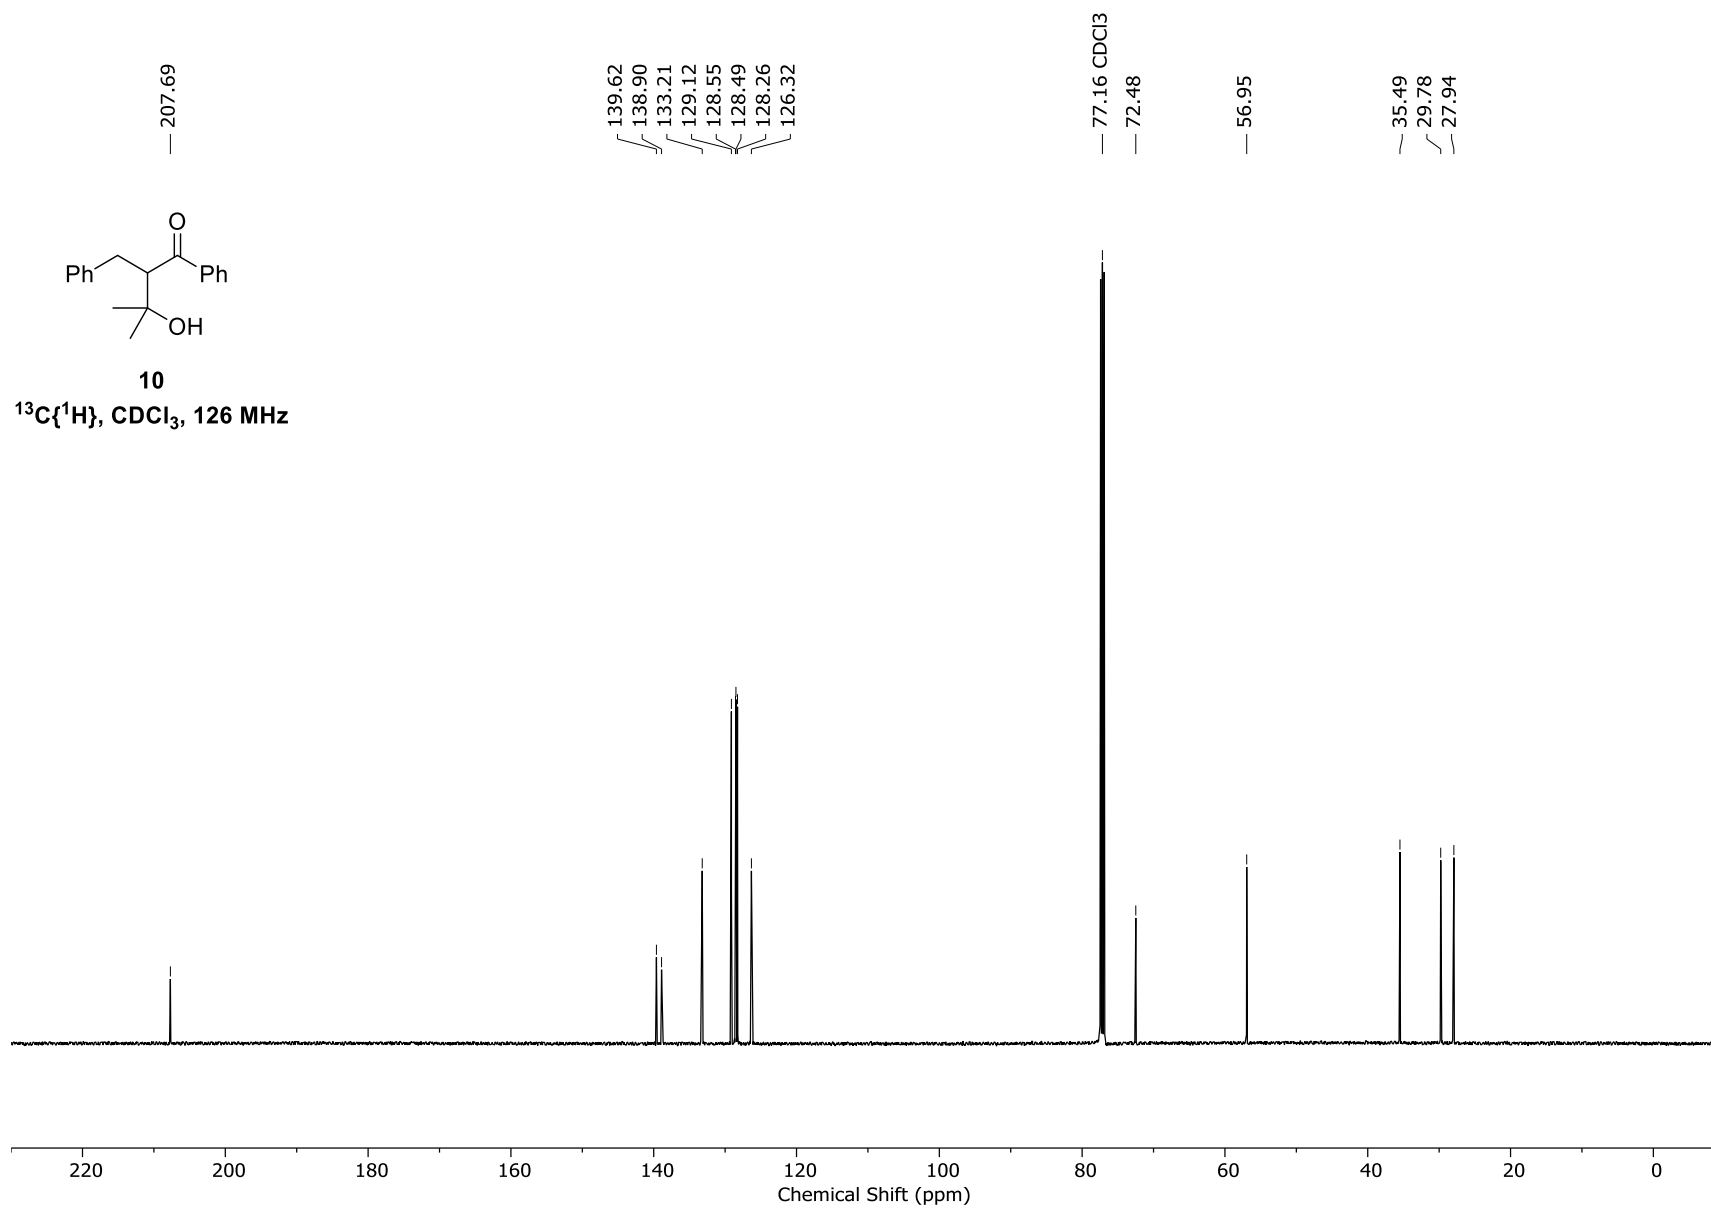

## Appendix II: HPLC Traces of Novel Compounds

### (2*S*,3*R*)-2-Benzyl-3-hydroxy-5-methyl-1-phenylhexan-1-one (3a)

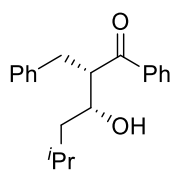

(2*S*,3*R*)-3a

CHIRALPAK IC, 95:5 *n*-hexane:isopropanol, flow rate 1.0 mL/min, 244 nm, 30 °C.  $t_R$  (2*R*,3*S*)-3a 7.9 min,  $t_R$  (2*S*,3*R*)-3a 8.9 min, 90:10 *e.r.*

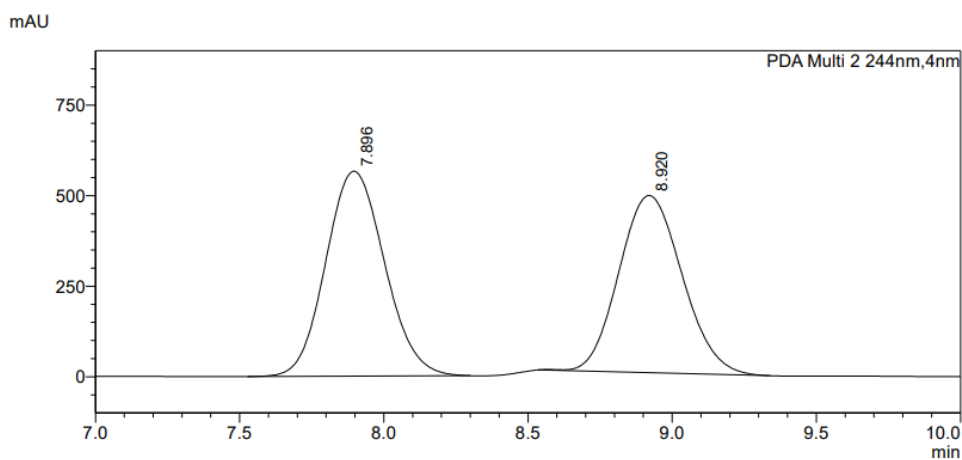

PDA Ch2 244nm

| Peak# | Ret. Time | Area     | Area%   |
|-------|-----------|----------|---------|
| 1     | 7.896     | 8041998  | 51.825  |
| 2     | 8.920     | 7475732  | 48.175  |
| Total |           | 15517730 | 100.000 |

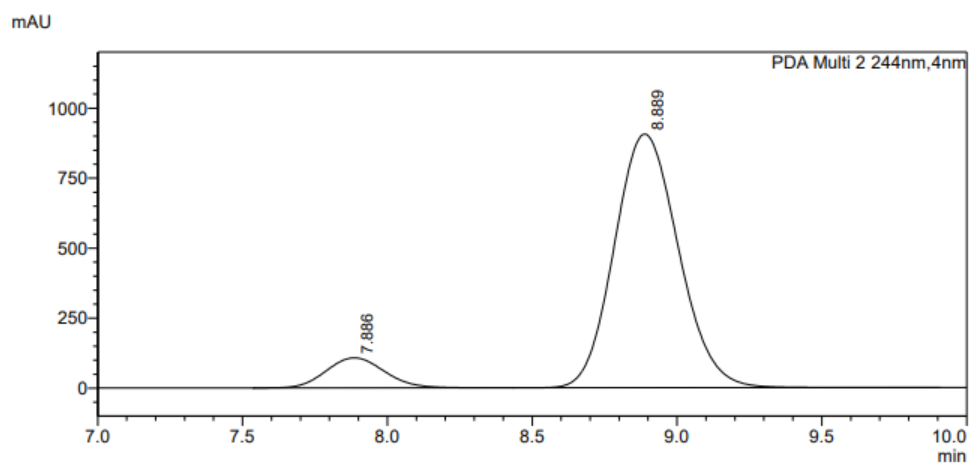

PDA Ch2 244nm

| Peak# | Ret. Time | Area     | Area%   |
|-------|-----------|----------|---------|
| 1     | 7.886     | 1503823  | 9.713   |
| 2     | 8.889     | 13979178 | 90.287  |
| Total |           | 15483001 | 100.000 |

CHIRALPAK IB, 95:5 *n*-hexane:isopropanol, flow rate 1.0 mL/min, 244 nm, 30 °C.  $t_R$  (**2S,3R**)-**3a** 6.7 min,  $t_R$  (**2R,3S**)-**3a** 9.3 min.  $t_R$  of single crystal (**2S,3R**)-**3a** 6.7 min

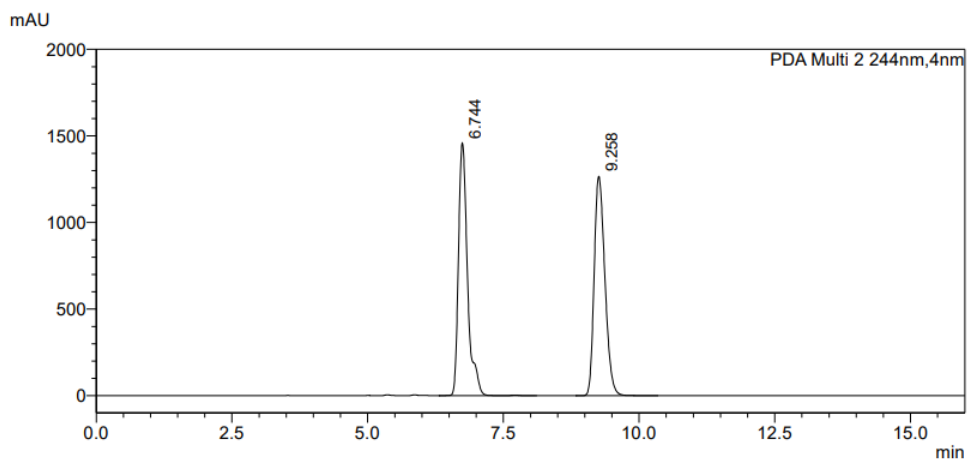

| PDA Ch2 244nm |           |          |         |
|---------------|-----------|----------|---------|
| Peak#         | Ret. Time | Area     | Area%   |
| 1             | 6.744     | 16949549 | 49.326  |
| 2             | 9.258     | 17412949 | 50.674  |
| Total         |           | 34362498 | 100.000 |

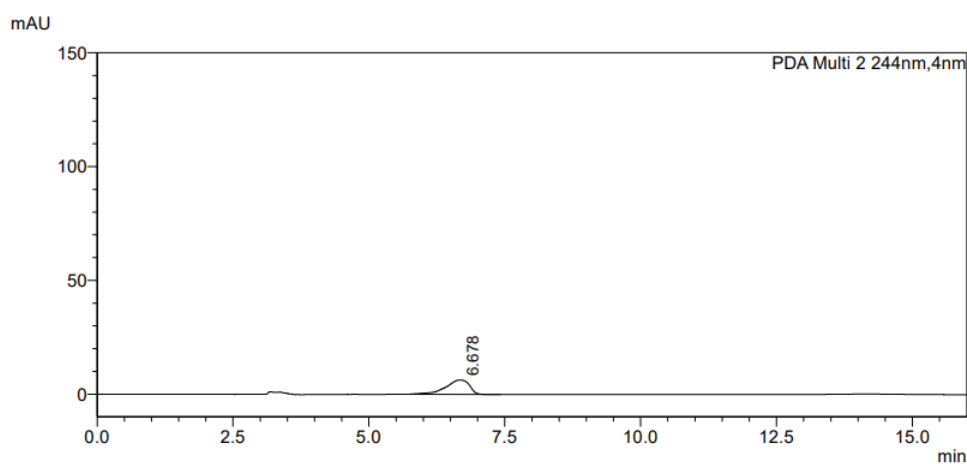

| PDA Ch2 244nm |           |        |         |
|---------------|-----------|--------|---------|
| Peak#         | Ret. Time | Area   | Area%   |
| 1             | 6.678     | 194367 | 100.000 |
| Total         |           | 194367 | 100.000 |

**(2*S*,3*R*)-2-Benzyl-3-cyclohexyl-3-hydroxy-1-phenylpropan-1-one (3e)**

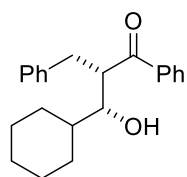

**(2*S*,3*R*)-3e**

CHIRALPAK IC, 95:5 *n*-hexane:isopropanol, flow rate 1.0 mL/min, 244 nm, 30 °C.  $t_R$  (2*R*,3*S*)-3e 10.8 min,  $t_R$  (2*S*,3*R*)-3e 12.7 min, 85:15 *e.r.*

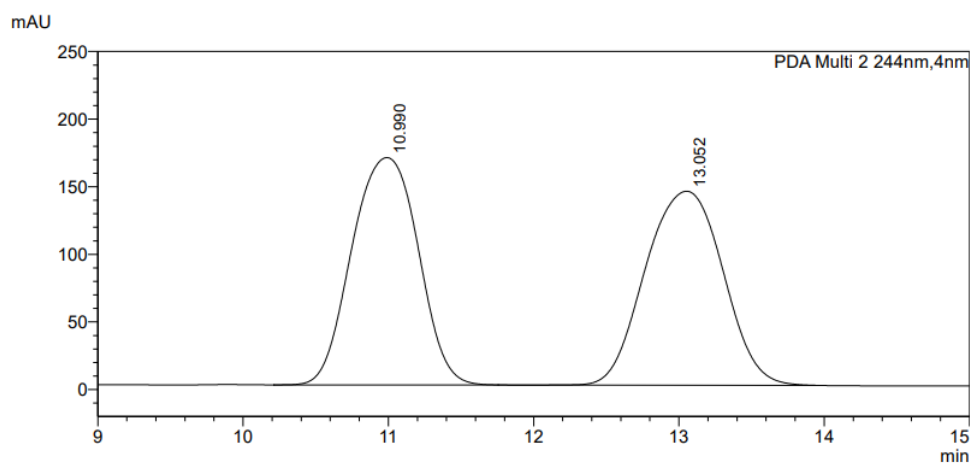

| PDA Ch2 244nm |           |          |         |
|---------------|-----------|----------|---------|
| Peak#         | Ret. Time | Area     | Area%   |
| 1             | 10.990    | 5350815  | 50.013  |
| 2             | 13.052    | 5347987  | 49.987  |
| Total         |           | 10698802 | 100.000 |

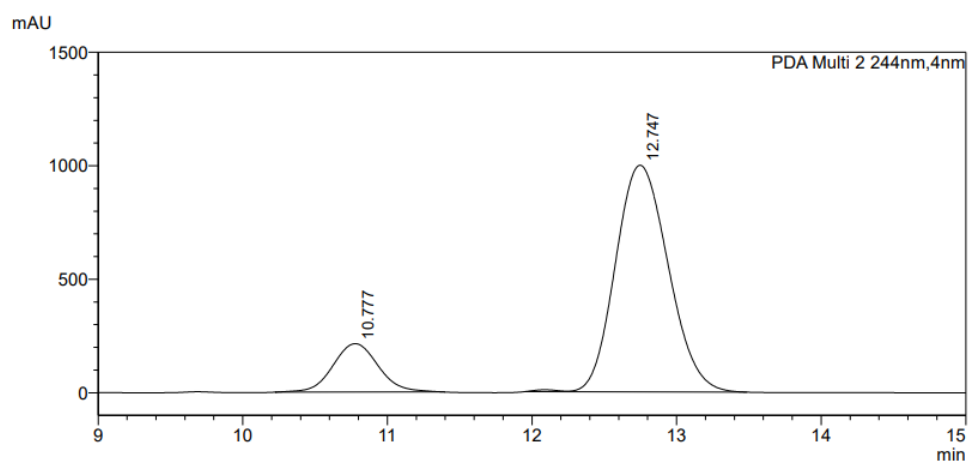

| PDA Ch2 244nm |           |          |         |
|---------------|-----------|----------|---------|
| Peak#         | Ret. Time | Area     | Area%   |
| 1             | 10.777    | 4662294  | 15.486  |
| 2             | 12.747    | 25444704 | 84.514  |
| Total         |           | 30106998 | 100.000 |

**(2S,3S)-2-Benzyl-3-hydroxy-4,4-dimethyl-1-phenylpentan-1-one (3f)**

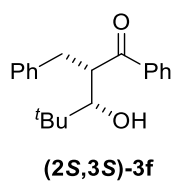

CHIRALPAK IC, 95:5 *n*-hexane:isopropanol, flow rate 1.0 mL/min, 244 nm, 30 °C.  $t_R$  (**2R,3R**)-**3f** 6.7 min,  $t_R$  (**2S,3S**)-**3f** 8.6 min, 86:14 *e.r.*

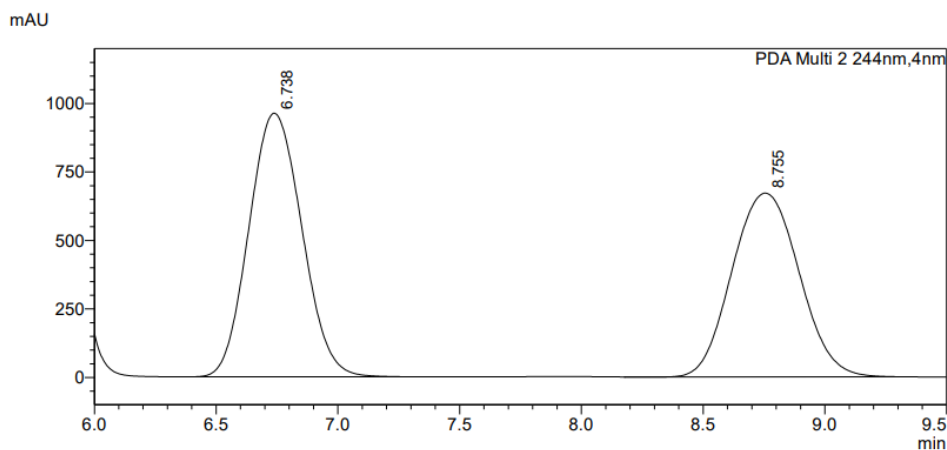

| PDA Ch2 244nm |           |          |         |
|---------------|-----------|----------|---------|
| Peak#         | Ret. Time | Area     | Area%   |
| 1             | 6.738     | 14579647 | 53.110  |
| 2             | 8.755     | 12871930 | 46.890  |
| Total         |           | 27451576 | 100.000 |

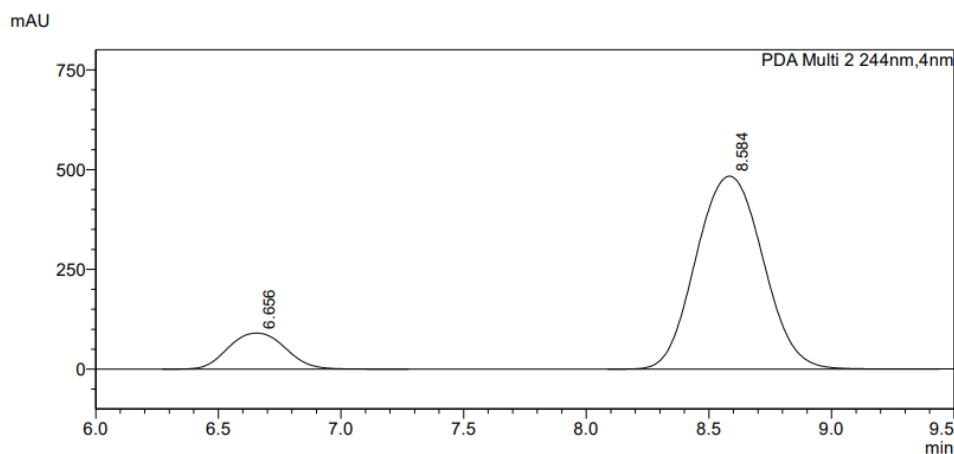

| PDA Ch2 244nm |           |          |         |
|---------------|-----------|----------|---------|
| Peak#         | Ret. Time | Area     | Area%   |
| 1             | 6.656     | 1459899  | 13.724  |
| 2             | 8.584     | 9177537  | 86.276  |
| Total         |           | 10637435 | 100.000 |

**(2S,3R)-2-Benzyl-1-(4-fluorophenyl)-3-hydroxy-5-methylhexan-1-one (3i)**

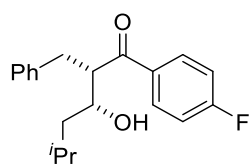

**(2S,3R)-3i**

CHIRALPAK IB, 95:5 *n*-hexane:isopropanol, flow rate 1.0 mL/min, 244 nm, 30 °C.  $t_R$  **(2S,3R)-3i** 6.9 min,  $t_R$  **(2R,3S)-3i** 10.7 min, 85:15 *e.r.*

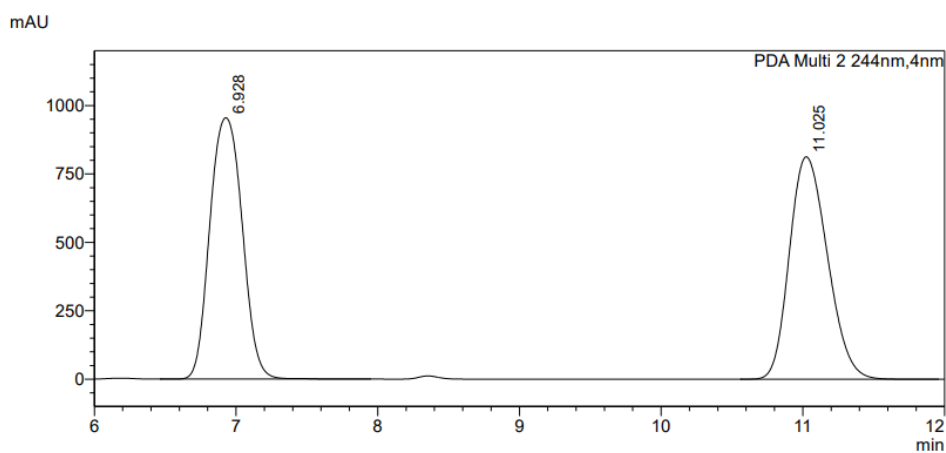

PDA Ch2 244nm

| Peak# | Ret. Time | Area     | Area%   |
|-------|-----------|----------|---------|
| 1     | 6.928     | 15225278 | 50.053  |
| 2     | 11.025    | 15192749 | 49.947  |
| Total |           | 30418026 | 100.000 |

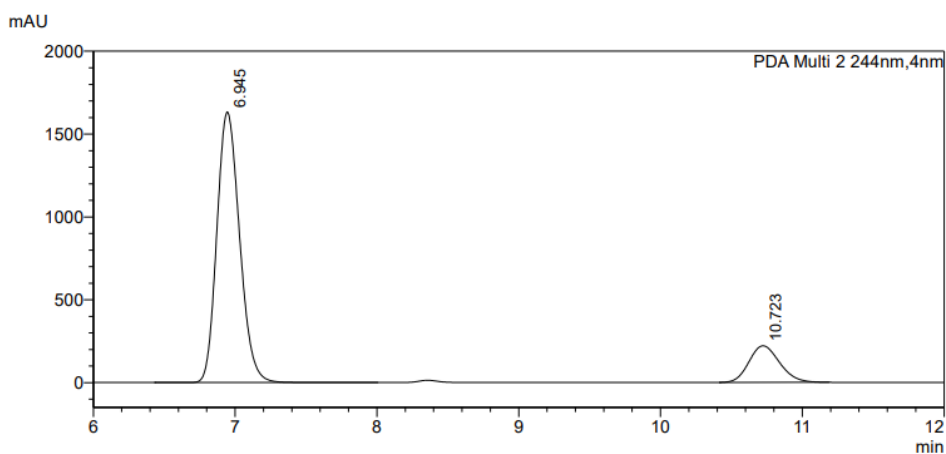

PDA Ch2 244nm

| Peak# | Ret. Time | Area     | Area%   |
|-------|-----------|----------|---------|
| 1     | 6.945     | 18158699 | 84.525  |
| 2     | 10.723    | 3324595  | 15.475  |
| Total |           | 21483295 | 100.000 |

**(2S,3R)-2-(2,4-Dimethoxy-6-methylbenzyl)-3-hydroxy-5-methyl-1-phenylhexan-1-one  
(3I)**

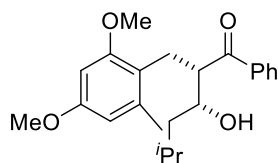

**(2S,3R)-3I**

CHIRALPAK IC, 95:5 *n*-hexane:isopropanol, flow rate 1.0 mL/min, 244 nm, 30 °C.  $t_R$  **(2R,3S)-3I** 12.0 min,  $t_R$  **(2S,3R)-3I** 19.3 min, 80:20 *e.r.*

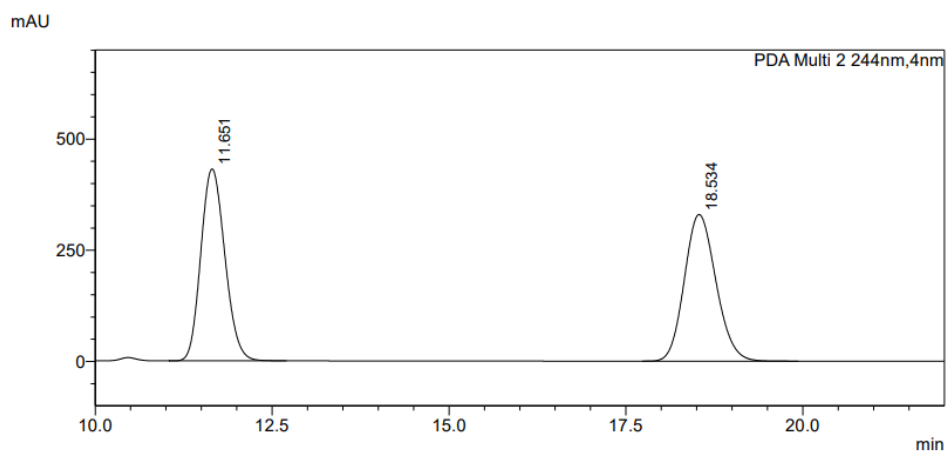

PDA Ch2 244nm

| Peak# | Ret. Time | Area     | Area%   |
|-------|-----------|----------|---------|
| 1     | 11.651    | 10203904 | 49.881  |
| 2     | 18.534    | 10252698 | 50.119  |
| Total |           | 20456602 | 100.000 |

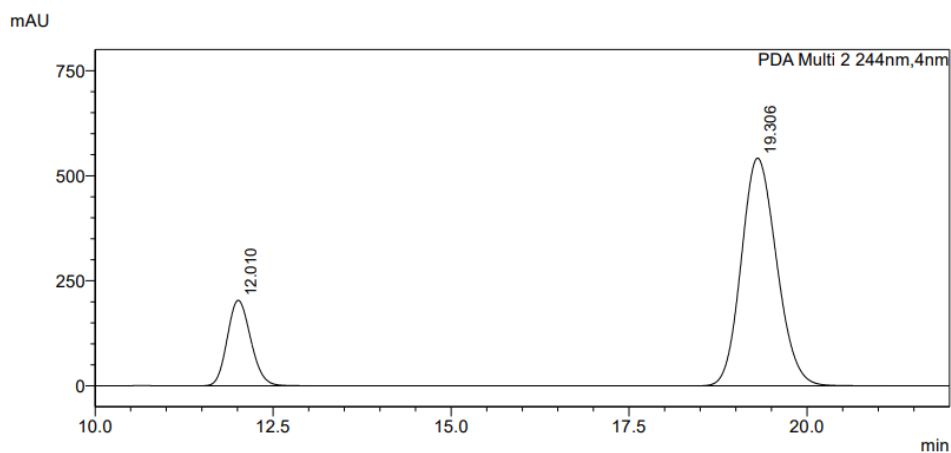

PDA Ch2 244nm

| Peak# | Ret. Time | Area     | Area%   |
|-------|-----------|----------|---------|
| 1     | 12.010    | 4661684  | 19.937  |
| 2     | 19.306    | 18720494 | 80.063  |
| Total |           | 23382178 | 100.000 |

**(2S,3R)-Methyl-4-(2-benzoyl-3-hydroxy-5-methylhexyl)benzoate (3n)**



**(2S,3R)-3n**

CHIRALPAK IC, 95:5 *n*-hexane:isopropanol, flow rate 1.0 mL/min, 244 nm, 30 °C.  $t_R$  (**2R,3S**)-3n 14.4 min,  $t_R$  (**2S,3R**)-3n 18.3 min, 84:16 e.r.

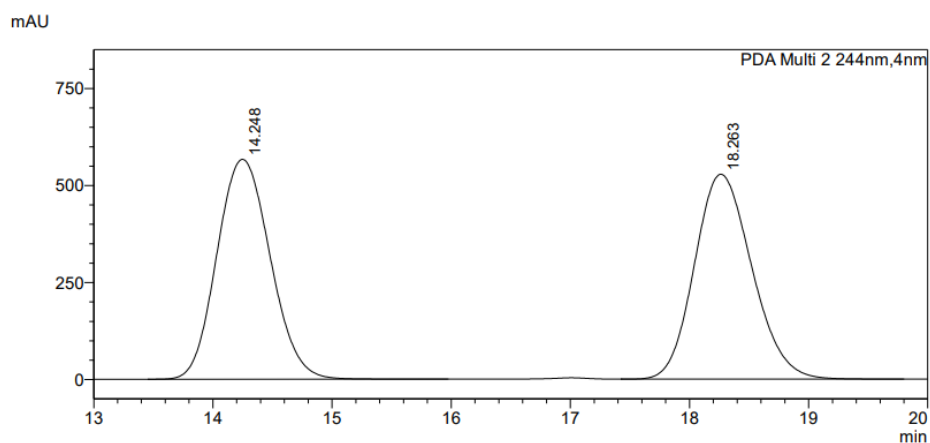

| Peak# | Ret. Time | Area     | Area%   |
|-------|-----------|----------|---------|
| 1     | 14.248    | 17632944 | 49.898  |
| 2     | 18.263    | 17705078 | 50.102  |
| Total |           | 35338022 | 100.000 |

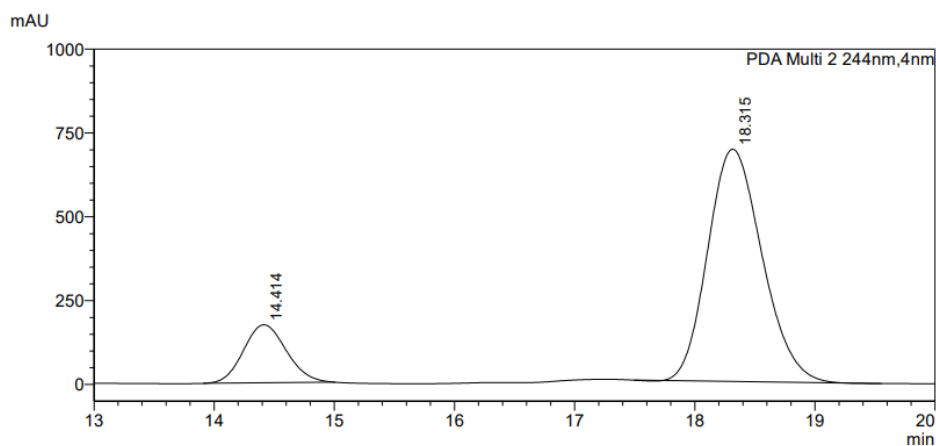

| Peak# | Ret. Time | Area     | Area%   |
|-------|-----------|----------|---------|
| 1     | 14.414    | 4293887  | 16.459  |
| 2     | 18.315    | 21794877 | 83.541  |
| Total |           | 26088764 | 100.000 |

**(2S,3R)-2-Benzyl-1-cyclopropyl-3-hydroxy-5-methylhexan-1-one (3q)**



**(2S,3R)-3q**

CHIRALPAK IC, 95:5 *n*-hexane:isopropanol, flow rate 1.0 mL/min, 210 nm, 30 °C.  $t_R$  (2R,3S)-3q 7.4 min,  $t_R$  (2S,3R)-3q 9.0 min, 80:20 e.r.

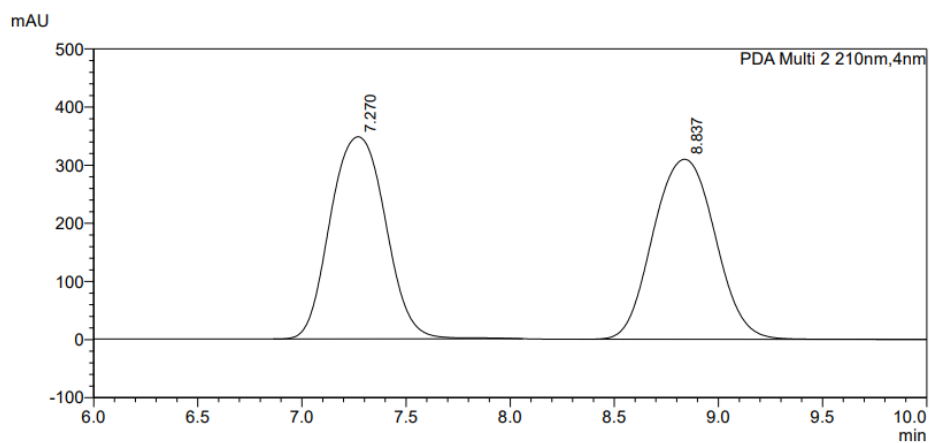

| PDA Ch2 210nm |           |          |         |
|---------------|-----------|----------|---------|
| Peak#         | Ret. Time | Area     | Area%   |
| 1             | 7.270     | 6428394  | 50.034  |
| 2             | 8.837     | 6419665  | 49.966  |
| Total         |           | 12848059 | 100.000 |

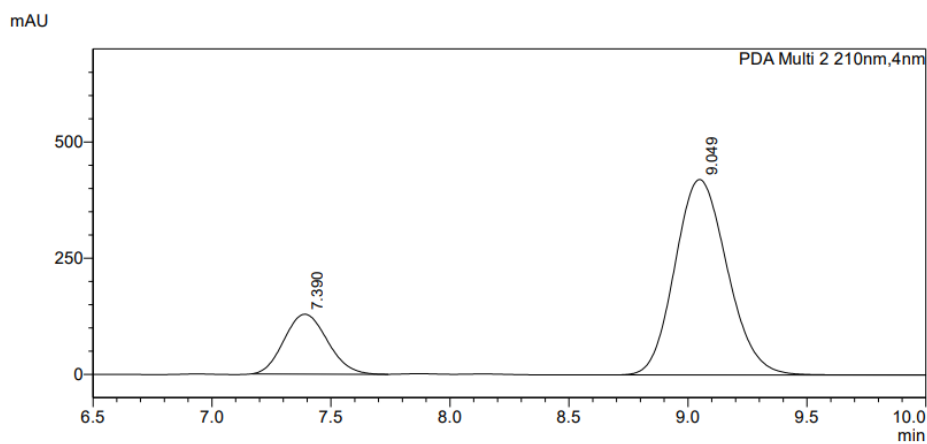

| PDA Ch2 210nm |           |         |         |
|---------------|-----------|---------|---------|
| Peak#         | Ret. Time | Area    | Area%   |
| 1             | 7.390     | 1630536 | 20.213  |
| 2             | 9.049     | 6436382 | 79.787  |
| Total         |           | 8066918 | 100.000 |

**(2S,3R)-4-Benzyl-5-hydroxy-2,2,7-trimethyloctan-3-one (3r)**



**(2S,3R)-3r**

CHIRALPAK IB, 95:5 *n*-hexane:isopropanol, flow rate 1.0 mL/min, 251 nm, 30 °C.  $t_R$  **(2S,3R)-3r** 8.3 min,  $t_R$  **(2R,3S)-3r** 10.7 min, 72:28 *e.r.*

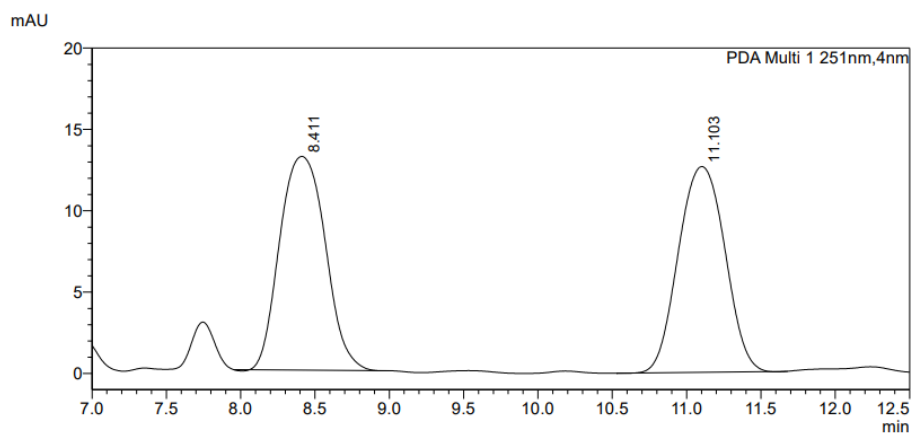

PDA Ch1 251nm

| Peak# | Ret. Time | Area   | Area%   |
|-------|-----------|--------|---------|
| 1     | 8.411     | 280789 | 50.438  |
| 2     | 11.103    | 275917 | 49.562  |
| Total |           | 556706 | 100.000 |

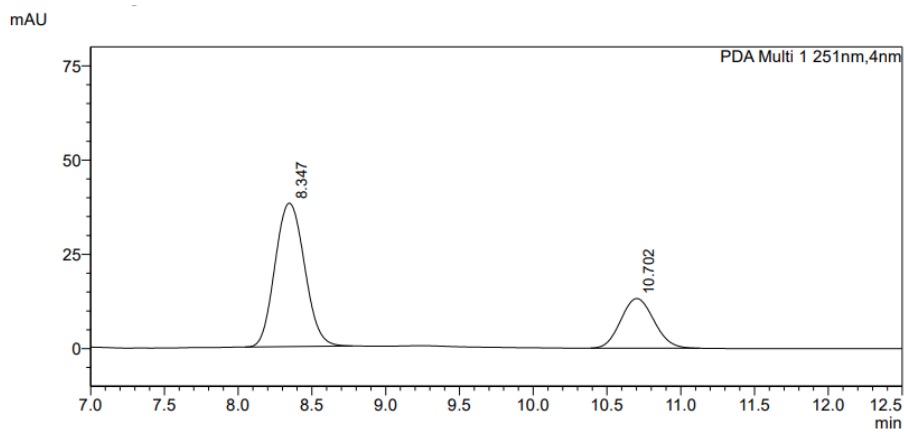

PDA Ch1 251nm

| Peak# | Ret. Time | Area   | Area%   |
|-------|-----------|--------|---------|
| 1     | 8.347     | 530933 | 72.102  |
| 2     | 10.702    | 205427 | 27.898  |
| Total |           | 736360 | 100.000 |

**(2*R*,3*R*)-2-Ethyl-3-hydroxy-1-(2,6,6-trimethylcyclohex-1-en-1-yl)octan-1-one (3s)**

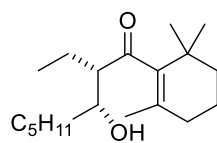

**(2*R*,3*R*)-3s**

CHIRALPAK IG, 99:1 *n*-hexane:isopropanol, flow rate 1.0 mL/min, 244 nm, 30 °C.  $t_R$  (**2*S*,3*S*)-3s** 17.2 min,  $t_R$  (**2*R*,3*R*)-3s** 18.5 min, 80:20 *e.r.*

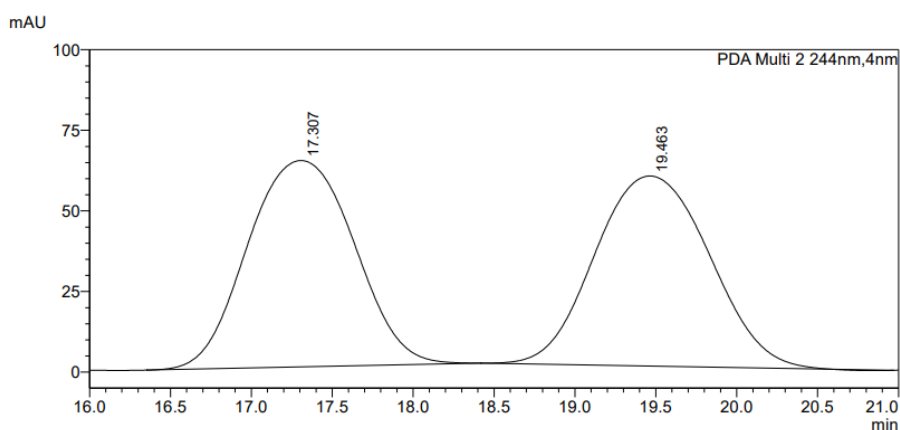

| PDA Ch2 244nm |           |         |         |
|---------------|-----------|---------|---------|
| Peak#         | Ret. Time | Area    | Area%   |
| 1             | 17.307    | 2935266 | 50.212  |
| 2             | 19.463    | 2910452 | 49.788  |
| Total         |           | 5845718 | 100.000 |

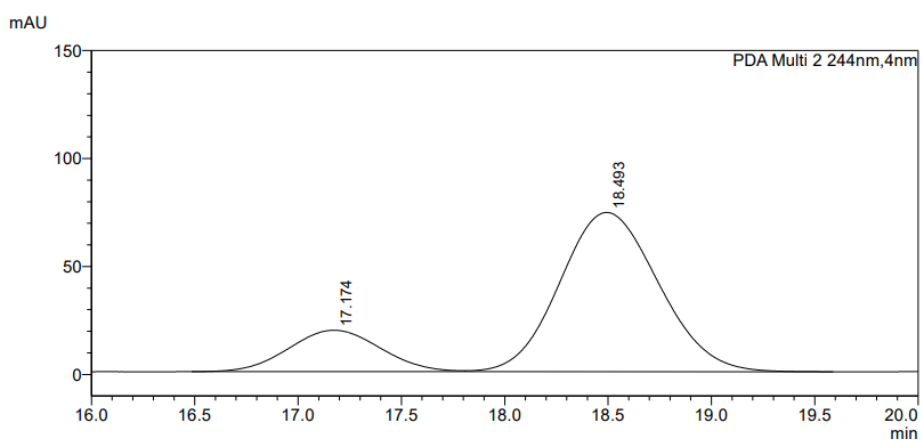

| PDA Ch2 244nm |           |         |         |
|---------------|-----------|---------|---------|
| Peak#         | Ret. Time | Area    | Area%   |
| 1             | 17.174    | 595291  | 19.510  |
| 2             | 18.493    | 2455975 | 80.490  |
| Total         |           | 3051267 | 100.000 |

## Appendix III: Single Crystal X-ray Diffraction Data

(3*S*,8*R*,9*S*,10*R*,13*S*,14*S*,17*S*)-17-Acetyl-17-((*S*)-1-hydroxy-3-methylbutyl)-10,13-dimethyl-2,3,4,7,8,9,10,11,12,13,14,15,16,17-tetradecahydro-1*H*-cyclopenta[*a*]-phenanthren-3-yl acetate (**3t**)

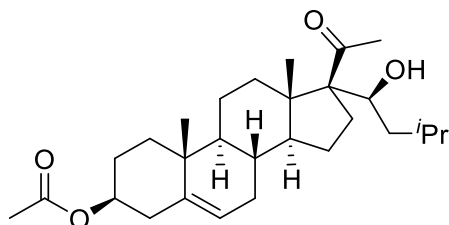

**3t**

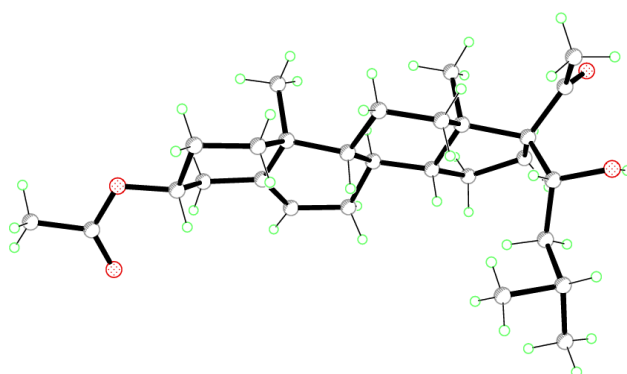

**$R_1=4.76\%$**

**Experimental.** Single clear colourless block-shaped crystals of **3t** (CCDC 2532648) recrystallised from diethyl ether by slow cooling. A suitable crystal with dimensions 0.25 × 0.20 × 0.18 mm<sup>3</sup> was selected and mounted on a mitegen tip in Paratone oil. on a XtaLAB Synergy R, HyPix-Arc 100 diffractometer. The crystal was kept at a steady  $T = 100.01(10)$  K during data collection. The structure was solved with the ShelXS (Sheldrick, 2008) solution program using direct methods and by using Olex2 1.5-beta (Dolomanov et al., 2009) as the graphical interface. The model was refined with ShelXL 2018/3 (Sheldrick, 2015) using full matrix least squares minimisation on  $F^2$ .

**Crystal Data.** C<sub>58.18</sub>H<sub>95.27</sub>O<sub>9.46</sub>,  $M_r = 946.04$ , monoclinic,  $P2_1$  (No. 4),  $a = 18.72992(14)$  Å,  $b = 7.65685(4)$  Å,  $c = 20.61406(15)$  Å,  $\beta = 116.1714(9)^\circ$ ,  $a = g = 90^\circ$ ,  $V = 2653.22(4)$  Å<sup>3</sup>,  $T = 100.01(10)$  K,  $Z = 2$ ,  $Z' = 1$ ,  $m(\text{Cu } K_\alpha) = 0.616$ , 102478 reflections measured, 11011 unique ( $R_{\text{int}} = 0.0327$ ) which were used in all calculations. The final  $wR_2$  was 0.1366 (all data) and  $R_1$  was 0.0476 ( $I \geq 2 \sigma(I)$ ).

**\_refine\_special\_details:** When both molecules had been modelled it was obvious from both displacement ellipsoids and residual peaks that a disordered mix of solvent was present. This was identified as a mix of diethyl ether (from crystallization) and water (present from prior work-up), modelled with similarity restraints.

| Compound                                       | 3t (CCDC 2532648)                                       |
|------------------------------------------------|---------------------------------------------------------|
| Formula                                        | C <sub>58.18</sub> H <sub>95.27</sub> O <sub>9.46</sub> |
| <i>D</i> <sub>calc.</sub> / g cm <sup>-3</sup> | 1.184                                                   |
| <i>m</i> /mm <sup>-1</sup>                     | 0.616                                                   |
| Formula Weight                                 | 946.04                                                  |
| Colour                                         | clear colourless                                        |
| Shape                                          | block-shaped                                            |
| Size/mm <sup>3</sup>                           | 0.25×0.20×0.18                                          |
| <i>T</i> /K                                    | 100.01(10)                                              |
| Crystal System                                 | monoclinic                                              |
| Flack Parameter                                | 0.02(3)                                                 |
| Hooft Parameter                                | 0.03(2)                                                 |
| Space Group                                    | <i>P</i> 2 <sub>1</sub>                                 |
| <i>a</i> /Å                                    | 18.72992(14)                                            |
| <i>b</i> /Å                                    | 7.65685(4)                                              |
| <i>c</i> /Å                                    | 20.61406(15)                                            |
| <i>a</i> <sup>°</sup>                          | 90                                                      |
| <i>b</i> <sup>°</sup>                          | 116.1714(9)                                             |
| <i>g</i> <sup>°</sup>                          | 90                                                      |
| <i>V</i> /Å <sup>3</sup>                       | 2653.22(4)                                              |
| <i>Z</i>                                       | 2                                                       |
| <i>Z</i> '                                     | 1                                                       |
| Wavelength/Å                                   | 1.54184                                                 |
| Radiation type                                 | Cu K <sub>α</sub>                                       |
| <i>Q</i> <sub>min</sub> <sup>°</sup>           | 2.388                                                   |
| <i>Q</i> <sub>max</sub> <sup>°</sup>           | 77.250                                                  |
| Measured Refl's.                               | 102478                                                  |
| Indep't Refl's                                 | 11011                                                   |
| Refl's I≥2 <i>s</i> (I)                        | 10705                                                   |
| <i>R</i> <sub>int</sub>                        | 0.0327                                                  |
| Parameters                                     | 855                                                     |
| Restraints                                     | 374                                                     |
| Largest Peak                                   | 0.601                                                   |
| Deepest Hole                                   | -0.302                                                  |
| GooF                                           | 1.059                                                   |
| <i>wR</i> <sub>2</sub> (all data)              | 0.1366                                                  |
| <i>wR</i> <sub>2</sub>                         | 0.1353                                                  |
| <i>R</i> <sub>1</sub> (all data)               | 0.0486                                                  |
| <i>R</i> <sub>1</sub>                          | 0.0476                                                  |

**(2*S*, 3*R*)-2-Benzyl-3-hydroxy-5-methyl-1-phenylhexan-1-one (3a)**

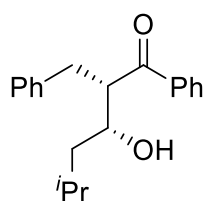

**(2*S*, 3*R*)-3a**

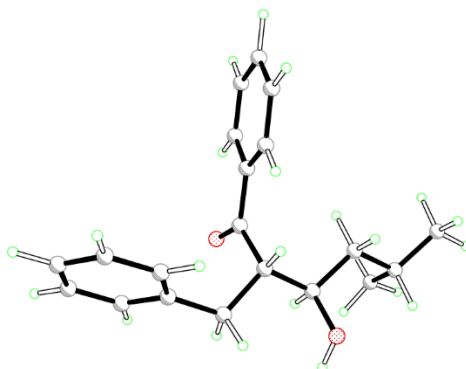

**$R_1=0.67\%$**

**Experimental.** Single colourless block-shaped crystals of **(2*S*, 3*R*)-3a** (CCDC 2532647). Slow cooling from hot ether. A suitable crystal with dimensions  $0.18 \times 0.11 \times 0.08 \text{ mm}^3$  was selected and mounted on a MITIGEN holder in Paratone oil. on a XtaLAB Synergy R, HyPix-Arc 100 diffractometer. The crystal was kept at a steady  $T = 100.00(10) \text{ K}$  during data collection. The structure was solved with the ShelXS (Sheldrick, 2008) solution program using direct methods and by using Olex2 1.5-beta (Dolomanov et al., 2009) as the graphical interface. The model was refined with olex2.refine 1.5-beta (Bourhis et al., 2015) using full matrix least squares minimisation on  $F^2$ .

**Crystal Data.**  $\text{C}_{20}\text{H}_{24}\text{O}_2$ ,  $M_r = 296.412$ , orthorhombic,  $P2_12_12_1$  (No. 19),  $a = 7.83692(3) \text{ \AA}$ ,  $b = 12.51912(4) \text{ \AA}$ ,  $c = 16.83910(5) \text{ \AA}$ ,  $a = b = c = 90^\circ$ ,  $V = 1652.106(9) \text{ \AA}^3$ ,  $T = 100.00(10) \text{ K}$ ,  $Z = 4$ ,  $Z' = 1$ ,  $m(\text{Cu K}\alpha) = 0.587$ , 106605 reflections measured, 3485 unique ( $R_{\text{int}} = 0.0206$ ) which were used in all calculations. The final  $wR_2$  was 0.0161 (all data) and  $R_1$  was 0.0067 ( $I \geq 2 \text{ s}(I)$ ).

*\_olex2\_refine\_details:* Refinement using NoSpherA2, an implementation of NON-SPHERICAL Atom-form-factors in Olex2. Please cite: F. Kleemiss et al. Chem. Sci. DOI 10.1039/D0SC05526C - 2021NoSpherA2 implementation of HAR makes use of tailor-made aspherical atomic form factors calculated on-the-fly from a Hirshfeld-partitioned electron density (ED) - not from spherical-atom form factors. The ED is calculated from a gaussian basis set single determinant SCF wavefunction - either Hartree-Fock or DFT using selected functionals - for a fragment of the crystal. This fragment can be embedded in an electrostatic crystal field by employing cluster charges or modelled using implicit solvation models, depending on the software used. The following options were used: SOFTWARE: ORCA 5.0 PARTITIONING: NoSpherA2 INT ACCURACY: Normal METHOD: r2SCAN BASIS SET: cc-pVTZ CHARGE: 0 MULTIPLICITY: 1 DATE: 2025-03-25\_09-55-17

| Compound                                       | (2 <i>S</i> , 3 <i>R</i> )-3a<br>(CCDC 2532647)       |
|------------------------------------------------|-------------------------------------------------------|
| Formula                                        | C <sub>20</sub> H <sub>24</sub> O <sub>2</sub>        |
| <i>D</i> <sub>calc.</sub> / g cm <sup>-3</sup> | 1.192                                                 |
| <i>m</i> /mm <sup>-1</sup>                     | 0.587                                                 |
| Formula Weight                                 | 296.412                                               |
| Colour                                         | colourless                                            |
| Shape                                          | block-shaped                                          |
| Size/mm <sup>3</sup>                           | 0.18×0.11×0.08                                        |
| <i>T</i> /K                                    | 100.00(10)                                            |
| Crystal System                                 | orthorhombic                                          |
| Flack Parameter                                | 0.011(13)                                             |
| Hoof Parameter                                 | 0.011(13)                                             |
| Space Group                                    | <i>P</i> 2 <sub>1</sub> 2 <sub>1</sub> 2 <sub>1</sub> |
| <i>a</i> /Å                                    | 7.83692(3)                                            |
| <i>b</i> /Å                                    | 12.51912(4)                                           |
| <i>c</i> /Å                                    | 16.83910(5)                                           |
| <i>a</i> <sup>°</sup>                          | 90                                                    |
| <i>b</i> <sup>°</sup>                          | 90                                                    |
| <i>g</i> <sup>°</sup>                          | 90                                                    |
| <i>V</i> /Å <sup>3</sup>                       | 1652.106(9)                                           |
| <i>Z</i>                                       | 4                                                     |
| <i>Z</i> '                                     | 1                                                     |
| Wavelength/Å                                   | 1.54184                                               |
| Radiation type                                 | Cu K <sub>α</sub>                                     |
| <i>Q</i> <sub>min</sub> <sup>°</sup>           | 4.40                                                  |
| <i>Q</i> <sub>max</sub> <sup>°</sup>           | 77.29                                                 |
| Measured Refl's.                               | 106605                                                |
| Indep't Refl's                                 | 3485                                                  |
| Refl's I≥2 s(I)                                | 3473                                                  |
| <i>R</i> <sub>int</sub>                        | 0.0206                                                |
| Parameters                                     | 415                                                   |
| Restraints                                     | 0                                                     |
| Largest Peak                                   | 0.0393                                                |
| Deepest Hole                                   | -0.0604                                               |
| GooF                                           | 1.7886                                                |
| <i>wR</i> <sub>2</sub> (all data)              | 0.0161                                                |
| <i>wR</i> <sub>2</sub>                         | 0.0161                                                |
| <i>R</i> <sub>1</sub> (all data)               | 0.0068                                                |
| <i>R</i> <sub>1</sub>                          | 0.0067                                                |
